# Supplementary material for: Single-Cell Analysis Uncovers Osteoblast Factor Growth Differentiation Factor 10 as Mediator of Vascular Smooth Muscle Cell Phenotypic Modulation Associated with Plaque Rupture in Human Carotid Artery Disease
Source: MDPI journal article supplement (doi:10.3390/ijms23031796), 2022-02-04
Supplement: s1 [file s1]

| p_val                | avg_logFC         | p_val_adj            | cluster | gene     |
|----------------------|-------------------|----------------------|---------|----------|
| 7.53904165908684e-38 | 0.948686432558543 | 1.04121704353648e-33 | 0       | Serpinf1 |
| 3.02703087813591e-33 | 1.20              | 4.18063234579351e-29 | 0       | Smoc2    |
| 1.49033217102682e-32 | 1.12              | 2.05829776140514e-28 | 0       | Abca8a   |
| 1.70962257550768e-28 | 1.44              | 2.36115973903366e-24 | 0       | F3       |
| 8.65323454389225e-28 | 0.978543581488903 | 1.19509822285696e-23 | 0       | Itgb1    |
| 1.5018306053642e-27  | 0.568905434097087 | 2.0741782490685e-23  | 0       | Cst3     |
| 6.18559756968191e-27 | 0.573160587944816 | 8.54292880348769e-23 | 0       | Col1a2   |
| 7.16040580555969e-25 | 1.33              | 9.88923645805849e-21 | 0       | Svep1    |
| 1.01526513774416e-24 | -1.26             | 1.40218268173845e-20 | 0       | Fn1      |
| 2.52813546351657e-24 | 0.659759485269025 | 3.49160788866274e-20 | 0       | Serping1 |
| 3.93286792466142e-24 | 0.647125287342419 | 5.43168389074988e-20 | 0       | Ctsl     |
| 5.12768170756052e-24 | 1.43              | 7.08184120631184e-20 | 0       | Gdf10    |
| 6.6453474771548e-23  | 0.904448910943556 | 9.17788940069849e-19 | 0       | Mfap4    |
| 2.78538237379201e-22 | 0.739483551418517 | 3.84689159644415e-18 | 0       | Pcolce   |
| 7.97423531906271e-22 | -1.18             | 1.10132163991575e-17 | 0       | Clu      |
| 1.25241601459942e-21 | 0.735049015271517 | 1.72971175776326e-17 | 0       | Fbln1    |
| 3.18010716608493e-21 | 1.02              | 4.39204600707989e-17 | 0       | Pdlim2   |
| 3.97256236111789e-21 | 1.31              | 5.48650587693992e-17 | 0       | Cpxm2    |
| 4.03974302917851e-21 | 1.50              | 5.57928909759844e-17 | 0       | Hsd11b1  |
| 9.55479525478003e-21 | 0.741015205601852 | 1.31961277263767e-16 | 0       | Pdgfra   |
| 0.00                 | 1.25              | 1.57266635179138e-16 | 0       | Fmod     |
| 1.96150883885884e-20 | 0.794623590107641 | 2.70903985734795e-16 | 0       | Abcc9    |
| 2.49144445674566e-20 | 0.667815335043508 | 3.44093393921143e-16 | 0       | Igfbp4   |
| 2.79041984795978e-20 | 0.54              | 3.85384885201726e-16 | 0       | Col1a1   |
| 3.42203142664774e-20 | 0.639679957411341 | 4.72616760334319e-16 | 0       | Ppap2b   |
| 3.50467468124023e-20 | 0.91              | 4.84030620226088e-16 | 0       | Cpxm1    |
| 4.07748665919897e-20 | 0.952739502278437 | 5.6314168250197e-16  | 0       | Dpep1    |
| 1.29303905247809e-19 | 0.59              | 1.78581623537749e-15 | 0       | Ogn      |
| 2.81496945955959e-19 | 0.859432861568306 | 3.88775432059774e-15 | 0       | Colec12  |
| 3.33951770492811e-19 | 0.650673170487534 | 4.61220790227622e-15 | 0       | Fmo2     |
| 4.8585323692514e-19  | 0.999038606431661 | 6.71011905517311e-15 | 0       | Clec11a  |
| 1.38440531079684e-18 | 0.90              | 1.91200217474151e-14 | 0       | Lama2    |
| 1.6773203809779e-18  | 0.492756977745771 | 2.31654717816858e-14 | 0       | Sepp1    |
| 1.73453858116848e-18 | 0.870137658705037 | 2.39557123445179e-14 | 0       | Nr2f2    |
| 7.63489775657294e-18 | 0.906969982153074 | 1.05445572916029e-13 | 0       | Tgfb1    |
| 8.32868769401732e-18 | 0.501186202789802 | 1.15027505742073e-13 | 0       | Dcn      |
| 2.36898162871974e-17 | 0.668232933724475 | 3.27180052742484e-13 | 0       | Adamts2  |
| 2.8325890472428e-17  | 1.10              | 3.91208873314703e-13 | 0       | Ndufa4l2 |
| 3.32277292753953e-17 | -1.16             | 4.58908169022485e-13 | 0       | Serpine2 |
| 4.74483293106772e-17 | 0.597104914356998 | 6.55308876109763e-13 | 0       | Dpt      |
| 8.10134123352963e-17 | -1.71             | 1.11887623776278e-12 | 0       | Ncam1    |
| 8.77127250637106e-17 | 0.364887927390828 | 1.21140044585491e-12 | 0       | Timp2    |
| 1.11154647859283e-16 | 0.784840235680463 | 1.53515684158455e-12 | 0       | Entpd2   |
| 2.11519606910416e-16 | 0.630971378983956 | 2.92129729103976e-12 | 0       | Cygb     |
| 2.51076202065463e-16 | -1.67             | 3.46761342672611e-12 | 0       | Tagln    |
| 3.6558717626155e-16  | -1.53             | 5.04912449134827e-12 | 0       | Pdlim1   |
| 5.81696647020935e-16 | 0.455479670062435 | 8.03381239200614e-12 | 0       | Gsn      |
| 7.17789652954249e-16 | -1.58             | 9.91339289695114e-12 | 0       | Synpo2   |
| 7.21689148801741e-16 | 0.870732052874177 | 9.96724883410084e-12 | 0       | Pltp     |
| 7.39655501947491e-16 | 0.997796614898677 | 1.02153821373968e-11 | 0       | Rbp4     |
| 8.95490119358801e-16 | -1.18             | 1.23676140384644e-11 | 0       | Myh11    |
| 9.13319234562263e-16 | 0.655428069023715 | 1.26138519485394e-11 | 0       | Col14a1  |
| 1.65225956849323e-15 | 0.403221565165966 | 2.28193569004599e-11 | 0       | Cd63     |
| 1.12446960258085e-14 | 1.04              | 1.55300496812441e-10 | 0       | Sfrp2    |
| 1.61299729645707e-14 | 0.719357208761395 | 2.22771056613687e-10 | 0       | Nucb2    |

|                      |                    |                      |   |          |
|----------------------|--------------------|----------------------|---|----------|
| 2.30239005525905e-14 | 0.727824618811614  | 3.17983090531827e-10 | 0 | Akap12   |
| 2.36626440352715e-14 | 1.46               | 3.26804776771135e-10 | 0 | Pex5l    |
| 3.13362515764771e-14 | 1.03               | 4.32784970522726e-10 | 0 | Podn     |
| 5.68285840782025e-14 | -0.852087851538703 | 7.84859574704055e-10 | 0 | Flna     |
| 5.95392431293756e-14 | 0.42               | 8.22296486859807e-10 | 0 | C1ra     |
| 1.1546599061472e-13  | 0.769870388106378  | 1.59470079637989e-09 | 0 | Clec3b   |
| 1.42881865195874e-13 | 0.971104128774017  | 1.97334144022022e-09 | 0 | Ntf3     |
| 1.44804202296925e-13 | 0.783573189223584  | 1.99989083792283e-09 | 0 | Bicc1    |
| 1.50462534874758e-13 | -0.947702126688808 | 2.07803806915529e-09 | 0 | Tpm1     |
| 1.72965302933743e-13 | 1.19               | 2.38882379881793e-09 | 0 | Pdgfrl   |
| 1.78550131059321e-13 | 0.649031786220351  | 2.46595586006028e-09 | 0 | Cd302    |
| 2.42350984149252e-13 | 0.549647800804438  | 3.34710944208532e-09 | 0 | Crispld2 |
| 2.55494461209002e-13 | 0.753186464070216  | 3.52863400375753e-09 | 0 | Igf1     |
| 4.56307238939547e-13 | -1.83              | 6.30205927699408e-09 | 0 | Mcam     |
| 8.83856035361262e-13 | 0.777263078877313  | 1.22069357043744e-08 | 0 | Olfml3   |
| 9.45688303117415e-13 | 0.401366497538366  | 1.30609011543546e-08 | 0 | Aebp1    |
| 1.07111162995823e-12 | 0.483047399392857  | 1.47931227213532e-08 | 0 | Tcf4     |
| 1.49628571555288e-12 | -1.17              | 2.06652020175009e-08 | 0 | Epas1    |
| 1.59649619953133e-12 | 0.417500296596018  | 2.20492090117272e-08 | 0 | Prelp    |
| 1.70896152771787e-12 | 0.425730585161959  | 2.36024676593115e-08 | 0 | Lum      |
| 2.3464537641286e-12  | 0.934944902327652  | 3.24068729363801e-08 | 0 | Dio2     |
| 2.85043482968281e-12 | -0.983459269304994 | 3.93673554327493e-08 | 0 | Postn    |
| 3.6451888855834e-12  | -1.18              | 5.03437036987923e-08 | 0 | Sparcl1  |
| 4.57410535827366e-12 | 1.07               | 6.31729691031175e-08 | 0 | Mdk      |
| 4.8556680854653e-12  | 0.662329800691227  | 6.70616319283613e-08 | 0 | Hexa     |
| 5.33240111332206e-12 | 1.53               | 7.3645791776091e-08  | 0 | Hhip     |
| 6.09560893855269e-12 | -2.02              | 8.41864550503512e-08 | 0 | Cnn1     |
| 7.22327896839952e-12 | 0.40               | 9.97607058325657e-08 | 0 | Rcn3     |
| 0.00                 | 1.04               | 1.02422940516822e-07 | 0 | Tmem204  |
| 8.02413234941918e-12 | -1.20              | 1.10821291877828e-07 | 0 | Wwp2     |
| 8.34197715684696e-12 | 1.23               | 1.15211046513213e-07 | 0 | Wnt5a    |
| 9.20805310502715e-12 | 0.654732151459167  | 1.2717242143353e-07  | 0 | Cebpd    |
| 9.35649828421837e-12 | 0.309301146207243  | 1.2922259780334e-07  | 0 | Timp3    |
| 1.1361620292118e-11  | 0.973030560525908  | 1.56915337854441e-07 | 0 | Sorcs2   |
| 1.31375102993119e-11 | 0.291455493654014  | 1.81442154743796e-07 | 0 | Nfib     |
| 1.42001701135066e-11 | 0.500799600548679  | 1.9611854943764e-07  | 0 | C1s1     |
| 1.55733630081702e-11 | 0.375659370632103  | 2.15083716505839e-07 | 0 | Serpinh1 |
| 1.61247206674755e-11 | 0.518158730538254  | 2.22698517138504e-07 | 0 | Islr     |
| 1.66139881080935e-11 | 0.35               | 2.29455789760879e-07 | 0 | Hsp90b1  |
| 1.68435171723736e-11 | 0.782548087309278  | 2.32625815667651e-07 | 0 | Scara5   |
| 1.78858518414653e-11 | 0.560315861669211  | 2.47021499782477e-07 | 0 | Abi3bp   |
| 1.88143773021227e-11 | 0.34               | 2.59845364919617e-07 | 0 | Lrp1     |
| 2.35950007275663e-11 | 1.15               | 3.25870555048418e-07 | 0 | Gpnmb    |
| 2.7547869831102e-11  | 0.438547767193759  | 3.80463630237349e-07 | 0 | Rnase4   |
| 2.78153412797857e-11 | -1.42              | 3.8415767841512e-07  | 0 | Cbr2     |
| 4.20169139681972e-11 | 0.349255560949269  | 5.80295598814771e-07 | 0 | Cfh      |
| 4.36924359314708e-11 | -1.19              | 6.03436232649543e-07 | 0 | Col18a1  |
| 4.56126553219126e-11 | -1.59              | 6.29956382650935e-07 | 0 | Pgm5     |
| 4.83155655981267e-11 | 0.599699720436588  | 6.67286276475727e-07 | 0 | Tmed3    |
| 5.15080851225914e-11 | -1.34              | 7.1137816362811e-07  | 0 | Itga8    |
| 5.24723423964606e-11 | 0.655699794151996  | 7.24695520837517e-07 | 0 | Mmp23    |
| 6.13022188813328e-11 | 0.57               | 8.46644944970087e-07 | 0 | Loxl1    |
| 6.56350517501366e-11 | 0.545273070056423  | 9.06485699721137e-07 | 0 | Plxdc2   |
| 6.60862571707465e-11 | 0.758738421096505  | 9.12717297785181e-07 | 0 | Aspn     |
| 7.9570385626347e-11  | 0.392087582025282  | 1.09894659588548e-06 | 0 | Tuba1a   |
| 8.48274195139484e-11 | 0.686183561191548  | 1.17155149090714e-06 | 0 | Boc      |

|                      |                    |                      |   |            |
|----------------------|--------------------|----------------------|---|------------|
| 1.00744159816642e-10 | -1.63              | 1.39137759122764e-06 | 0 | Tspan2     |
| 1.07806341242473e-10 | 0.536365026177494  | 1.48891337889979e-06 | 0 | Cyp1b1     |
| 1.1124076771587e-10  | 0.386315667747261  | 1.53634624292388e-06 | 0 | Mettl7a1   |
| 1.11974213929813e-10 | 0.606700547844863  | 1.54647586858465e-06 | 0 | Gm2a       |
| 1.19902715273018e-10 | 0.285043406785377  | 1.65597640063565e-06 | 0 | Pmp22      |
| 1.2842917258286e-10  | 0.40               | 1.77373530254187e-06 | 0 | Mfap5      |
| 1.52594856306247e-10 | -1.90              | 2.10748756044558e-06 | 0 | Sh3bgr     |
| 1.69508271259758e-10 | 0.641460658613215  | 2.34107873436852e-06 | 0 | Pcolce2    |
| 2.13084502325643e-10 | 0.395539123653319  | 2.94291006161945e-06 | 0 | Pi16       |
| 2.49046327908457e-10 | 0.644467585127004  | 3.4395788347437e-06  | 0 | Pdgfrb     |
| 2.57705674912224e-10 | 0.870818237259123  | 3.55917307621272e-06 | 0 | Ms4a4d     |
| 2.60963449881259e-10 | -1.93              | 3.60416620631007e-06 | 0 | Ecscr      |
| 2.81667838352808e-10 | 0.838020510874898  | 3.89011451549063e-06 | 0 | Lbh        |
| 3.53210028214562e-10 | 1.35               | 4.87818369967132e-06 | 0 | D630003M21 |
| 3.59841406299643e-10 | -0.930842355086839 | 4.96976966240437e-06 | 0 | Pdlim3     |
| 3.64995282536674e-10 | 1.25               | 0.00                 | 0 | Glt8d2     |
| 3.70578012236677e-10 | -2.04              | 5.11805292700075e-06 | 0 | Tinagl1    |
| 3.85976665456042e-10 | -1.33              | 5.3307237266134e-06  | 0 | Enah       |
| 4.90834679449474e-10 | -1.76              | 6.77891775787669e-06 | 0 | Npnt       |
| 5.28365658536959e-10 | 0.798342221108697  | 7.29725811005394e-06 | 0 | Col4a4     |
| 6.26746399834948e-10 | 0.755061271250469  | 8.65599452812046e-06 | 0 | Fmo1       |
| 6.50235855118001e-10 | 0.468594734858688  | 8.98040739503471e-06 | 0 | Ntn1       |
| 7.88749819152594e-10 | 0.396892342943088  | 1.08934237523165e-05 | 0 | Il11ra1    |
| 8.63752619376676e-10 | 0.33               | 1.19292874262113e-05 | 0 | Mt1        |
| 8.67114629678505e-10 | 0.278830775836894  | 1.19757201504898e-05 | 0 | Sptbn1     |
| 8.72127076944399e-10 | -1.78              | 1.20449470596791e-05 | 0 | Tek        |
| 1.09664778356359e-09 | 1.56               | 1.51458025387968e-05 | 0 | Gfra2      |
| 1.12679428761827e-09 | -1.32              | 1.5562155906296e-05  | 0 | Cd97       |
| 1.20829430978955e-09 | 0.514336152643474  | 1.66877527125035e-05 | 0 | Vkorc1     |
| 1.25407379713042e-09 | 0.528051502557503  | 1.73200132121682e-05 | 0 | Meg3       |
| 1.46848707483231e-09 | -1.95              | 2.02812749905091e-05 | 0 | Myom1      |
| 1.51537074738256e-09 | 0.647217250510793  | 2.09287853921006e-05 | 0 | Gas1       |
| 1.5486129620642e-09  | 1.16               | 2.13878936190687e-05 | 0 | Tmem119    |
| 1.75389050456484e-09 | -0.651830750601069 | 2.4222981758545e-05  | 0 | Utn        |
| 1.93910658207647e-09 | -0.991948702439684 | 2.67810010050581e-05 | 0 | Acta2      |
| 2.16412824233157e-09 | 0.628705862873742  | 2.98887751548414e-05 | 0 | Slit3      |
| 2.20456944664823e-09 | -1.05              | 3.04473086276587e-05 | 0 | Aoc3       |
| 2.28355241945514e-09 | 0.737465511122363  | 3.1538142465095e-05  | 0 | Aldh1a1    |
| 2.45463108342625e-09 | 0.350948487382684  | 3.39009098931999e-05 | 0 | Ppib       |
| 3.6008174041998e-09  | 0.619876348917895  | 4.97308891694034e-05 | 0 | Atf5       |
| 3.86259593719781e-09 | 0.487829114534937  | 5.33463124886389e-05 | 0 | Dnajc3     |
| 3.9916514482811e-09  | -1.22              | 5.51286981522102e-05 | 0 | Cdh13      |
| 4.06275904237635e-09 | 0.563542993297322  | 5.61107651342598e-05 | 0 | Add3       |
| 4.12143198508835e-09 | 0.984916167759888  | 5.69210971460552e-05 | 0 | Kcnj8      |
| 4.19587270933259e-09 | 0.539110807004194  | 5.79491979885925e-05 | 0 | Fkbp7      |
| 4.24206516859173e-09 | -1.50              | 5.85871620434203e-05 | 0 | Efnb2      |
| 4.42477449411229e-09 | 1.01               | 6.11105605381848e-05 | 0 | Arhgap20   |
| 4.43290942486884e-09 | 1.13               | 6.12229120668636e-05 | 0 | Shisa3     |
| 4.63378134618662e-09 | 0.486072151338765  | 6.39971541721835e-05 | 0 | Ssr4       |
| 4.9812506870009e-09  | 0.677147095277005  | 6.87960532381694e-05 | 0 | Pkd2       |
| 5.24239229122264e-09 | 0.53               | 7.24026799340759e-05 | 0 | Gpx8       |
| 5.34647653163678e-09 | 0.601223638870754  | 7.38401873784355e-05 | 0 | Lpar1      |
| 5.95974539749778e-09 | -0.668300715684147 | 8.23100436848419e-05 | 0 | Pdlim7     |
| 6.11366707132889e-09 | 1.68               | 8.44358559221233e-05 | 0 | Al507597   |
| 6.45044833838285e-09 | 0.272346751972493  | 8.90871420014055e-05 | 0 | Anxa5      |
| 7.19480690936187e-09 | -0.814132160114915 | 9.93674782251968e-05 | 0 | Ktn1       |

|                      |                    |                      |   |             |
|----------------------|--------------------|----------------------|---|-------------|
| 7.76269864637238e-09 | 0.51               | 0.000107210631005049 | 0 | Atp6ap2     |
| 8.31383806097696e-09 | 1.07               | 0.000114822417460153 | 0 | Adamtsl2    |
| 8.45789517764565e-09 | 0.305335415875986  | 0.000116811990298464 | 0 | Col3a1      |
| 8.53757295246088e-09 | 0.892784992521013  | 0.000117912420046437 | 0 | Bace2       |
| 8.78533343630196e-09 | 0.368469825678334  | 0.000121334240088766 | 0 | Gas6        |
| 8.96682516659092e-09 | -1.27              | 0.000123840822375787 | 0 | Bcam        |
| 9.1952336821633e-09  | 0.979407176281109  | 0.000126995372384357 | 0 | Inmt        |
| 9.9096340267241e-09  | 0.733268960929139  | 0.000136861955543087 | 0 | Ppm1d       |
| 1.00796195470833e-08 | -1.34              | 0.000139209625564767 | 0 | Limch1      |
| 1.0741268193876e-08  | -0.706650378535855 | 0.000148347655025621 | 0 | Lpp         |
| 1.19324350554548e-08 | -1.02              | 0.000164798860550886 | 0 | Itih4       |
| 1.20220229479431e-08 | -0.963580156203032 | 0.000166036158934043 | 0 | Cav1        |
| 1.25182463645601e-08 | -0.973184259694637 | 0.00017288950054094  | 0 | Csrp1       |
| 1.28423059235256e-08 | 0.580192911447656  | 0.000177365087109813 | 0 | Runx1t1     |
| 1.28880020441299e-08 | -1.69              | 0.000177996196231478 | 0 | Hspb6       |
| 1.3044162704278e-08  | 0.993481170997198  | 0.000180152931108783 | 0 | C1qtnf2     |
| 1.34917926021558e-08 | 0.309513923185901  | 0.000186335147628373 | 0 | Selm        |
| 1.48586672887756e-08 | -1.84              | 0.00020521305392528  | 0 | Cd93        |
| 1.76819866625235e-08 | -0.934433013299971 | 0.000244205917796112 | 0 | Xpr1        |
| 1.83991539489155e-08 | 0.357655605558587  | 0.000254110715188472 | 0 | Col6a1      |
| 1.86489000198474e-08 | 1.06               | 0.000257559958174113 | 0 | Aspa        |
| 2.00741575052513e-08 | 0.375809825581602  | 0.000277244189305026 | 0 | Gstm2       |
| 2.10150377432841e-08 | 1.29               | 0.000290238686272497 | 0 | Angptl7     |
| 3.0278900664264e-08  | -1.35              | 0.00041818189707415  | 0 | Pcp4l1      |
| 3.07255921141286e-08 | 0.535702320367972  | 0.00042435115268823  | 0 | Fcgrt       |
| 3.16756507524734e-08 | 1.03               | 0.00043747241254241  | 0 | Fzd2        |
| 3.19340663625437e-08 | -1.35              | 0.000441041390533091 | 0 | Ehd4        |
| 3.24938273860423e-08 | -1.38              | 0.000448772250028631 | 0 | Lims2       |
| 3.30452520861961e-08 | -0.579850113110261 | 0.000456387976562455 | 0 | Dpysl3      |
| 3.31750871131583e-08 | 0.887011089122679  | 0.00045818112811983  | 0 | Trib2       |
| 3.55128740217385e-08 | -1.06              | 0.00049046830311423  | 0 | Pkp4        |
| 3.68675657945296e-08 | 0.822802382600096  | 0.000509177951188248 | 0 | Lrp6        |
| 3.88555175644627e-08 | 0.881504851997374  | 0.000536633553082795 | 0 | Fbln7       |
| 4.29324735045317e-08 | 0.814577007795649  | 0.000592940391571087 | 0 | Epha3       |
| 4.34862298580609e-08 | -1.71              | 0.000600588320569679 | 0 | Vwf         |
| 4.6132743220561e-08  | 0.562558452705735  | 0.000637139316619168 | 0 | Leprel2     |
| 4.7003323228044e-08  | -0.854468887202705 | 0.000649162897102515 | 0 | Ppp1r12a    |
| 4.90955275319577e-08 | 0.561594897982186  | 0.000678058330743867 | 0 | Prrx1       |
| 5.35697785363855e-08 | -1.83              | 0.00073985221136602  | 0 | Emb         |
| 5.64781532703948e-08 | -1.39              | 0.000780019774817423 | 0 | Srgn        |
| 5.69951377411723e-08 | 0.622885417828221  | 0.00078715984734333  | 0 | Hexb        |
| 5.80149543400901e-08 | 0.502040032780116  | 0.000801244534390984 | 0 | Chpf        |
| 5.8584780673317e-08  | -0.999865307184346 | 0.000809114405879181 | 0 | Mrvi1       |
| 6.13346072385668e-08 | -0.994478820498319 | 0.000847092260571845 | 0 | Mustn1      |
| 6.27742812748056e-08 | 0.89               | 0.00086697559868634  | 0 | Kcne4       |
| 6.56552169685571e-08 | -1.22              | 0.000906764201552742 | 0 | Dsp         |
| 6.68863938712972e-08 | 1.09               | 0.000923767985756485 | 0 | Deptor      |
| 6.95705254104321e-08 | 0.970092685778236  | 0.000960838526443478 | 0 | Slc38a4     |
| 7.40499094974638e-08 | 0.612495849814001  | 0.00102270330006947  | 0 | Epb4.1l2    |
| 7.41338965949802e-08 | -1.64              | 0.00102386324587327  | 0 | Nes         |
| 7.57651833541618e-08 | 0.319123261407228  | 0.00104639294730433  | 0 | Sec62       |
| 8.13215200730959e-08 | 0.340410585787533  | 0.00112313151372953  | 0 | Bmp4        |
| 9.07896953261712e-08 | -1.09              | 0.00125389648214975  | 0 | Inpp5a      |
| 1.05885346671105e-07 | 1.08               | 0.00146238252287463  | 0 | Slc1a3      |
| 1.10505786400443e-07 | -1.22              | 0.00152619541597652  | 0 | Entpd1      |
| 1.18396340719794e-07 | 1.08               | 0.00163517186168108  | 0 | 5031426D15f |



|                      |                    |                     |   |         |
|----------------------|--------------------|---------------------|---|---------|
| 1.18528519549048e-07 | 0.630456788614335  | 0.00163699738349191 | 0 | Igfbp5  |
| 1.19489116794128e-07 | -1.02              | 0.0016502641920437  | 0 | Cav2    |
| 1.28776338664079e-07 | -1.12              | 0.00177853001328959 | 0 | Mylk    |
| 1.30701725286191e-07 | 0.427919624403393  | 0.00180512152792759 | 0 | Fkbp9   |
| 1.33331899027852e-07 | 0.758289598951928  | 0.00184144685747367 | 0 | Gli1    |
| 1.39705533611381e-07 | 0.337381713544265  | 0.00192947312470678 | 0 | Rarres2 |
| 1.44926541043856e-07 | -1.31              | 0.0020015804583567  | 0 | Tpm2    |
| 1.47274726120643e-07 | -0.591481274151776 | 0.0020340112424522  | 0 | Actn4   |
| 1.6170439639735e-07  | -0.660708889103685 | 0.0022332994186438  | 0 | Pdgfa   |
| 1.71264526217686e-07 | -0.695582647728284 | 0.00236533437159246 | 0 | Zyx     |
| 1.76296153698731e-07 | 0.301125202933143  | 0.00243482617873318 | 0 | Fosb    |
| 1.77475644148306e-07 | 0.358795796644146  | 0.00245111612133225 | 0 | Gm      |
| 1.78096634568384e-07 | 1.39               | 0.00245969262002396 | 0 | Omd     |
| 1.81892871819181e-07 | 1.09               | 0.00251212245269471 | 0 | Cntn6   |
| 1.84948907864309e-07 | 0.275075468261048  | 0.00255432936651397 | 0 | Wfdc1   |
| 1.92286116595471e-07 | 0.366822264295442  | 0.00265566355630004 | 0 | Fam198b |
| 1.94919603292478e-07 | 0.718975898590896  | 0.00269203464107241 | 0 | Dab2    |
| 2.24882037217964e-07 | 0.349341554648635  | 0.0031058458160173  | 0 | Lamb2   |
| 2.34554134463355e-07 | 0.313127438545116  | 0.00323942715107339 | 0 | Celf2   |
| 2.5100544372077e-07  | 0.492807640039877  | 0.00346663618322755 | 0 | Scn7a   |
| 2.67619869873316e-07 | -0.796276789197797 | 0.00369609802282037 | 0 | Rab11a  |
| 2.88673683475249e-07 | 0.851386828617457  | 0.00398687224247667 | 0 | G0s2    |
| 2.99112570296978e-07 | 0.465431567732884  | 0.00413104370837156 | 0 | Fuca1   |
| 3.25143019109735e-07 | 0.597364562197213  | 0.00449055023692455 | 0 | Ctsk    |
| 3.44830253417477e-07 | 0.280719432598625  | 0.00476245062994877 | 0 | Rbms3   |
| 3.52556230902655e-07 | -0.691689129314132 | 0.00486915410499657 | 0 | Actn1   |
| 3.67100576317582e-07 | 0.944756993210765  | 0.00507002605952213 | 0 | Dtx4    |
| 3.76824259143971e-07 | 0.326161611139119  | 0.00520431984303739 | 0 | Ackr3   |
| 4.01111285848517e-07 | 0.283616416462959  | 0.00553974796885386 | 0 | Fbln5   |
| 4.33788975552029e-07 | 0.659113379419781  | 0.00599105954134907 | 0 | C7      |
| 4.79021765880427e-07 | -0.494227819945403 | 0.00661576960857458 | 0 | Tmsb4x  |
| 5.58171036278441e-07 | 0.898365113330684  | 0.00770890018204155 | 0 | Vstm4   |
| 6.18914055520324e-07 | -0.715055553707996 | 0.00854782202079119 | 0 | Kif1c   |
| 6.73111366812763e-07 | -1.43              | 0.00929634108705107 | 0 | Efhd1   |
| 6.86985038077045e-07 | 0.312968555840807  | 0.00948795036088206 | 0 | Slc43a3 |
| 6.87408825048661e-07 | 0.982620790546952  | 0.00949380328274705 | 0 | Colec11 |
| 7.20272183018077e-07 | 1.16               | 0.00994767911966266 | 0 | Lamc3   |
| 7.26584424060271e-07 | -1.09              | 0.0100348574806964  | 0 | Asap2   |
| 7.81265575166492e-07 | -1.08              | 0.0107900588586244  | 0 | Rcan2   |
| 7.91022268044068e-07 | 0.42               | 0.0109248085439566  | 0 | Cfb     |
| 8.19360618554305e-07 | -0.546885391203143 | 0.0113161895028535  | 0 | Map1b   |
| 8.56270081001328e-07 | 0.436334707974773  | 0.0118259460887093  | 0 | Atp1a2  |
| 8.70061895596715e-07 | -0.840034879802548 | 0.0120164248400862  | 0 | Stk38l  |
| 8.7544135281677e-07  | 0.336757466339993  | 0.0120907205237524  | 0 | Mmp2    |
| 1.03421906027933e-06 | 0.708078545573693  | 0.0142835994415179  | 0 | Pid1    |
| 1.04500020302176e-06 | -1.06              | 0.0144324978039335  | 0 | Speg    |
| 1.17260222656835e-06 | 0.420236925079748  | 0.0161948093511355  | 0 | Twsg1   |
| 1.2020792855104e-06  | -2.17              | 0.0166019170121842  | 0 | Mmm2    |
| 1.23469912113093e-06 | -1.01              | 0.0170524295619393  | 0 | Hbegf   |
| 1.37067090188918e-06 | 0.309403670985782  | 0.0189303358259914  | 0 | Nid1    |
| 1.45013592623565e-06 | 0.700130685957676  | 0.0200278272772406  | 0 | Qpct    |
| 1.48022072981531e-06 | -2.15              | 0.0204433284994792  | 0 | Egfl7   |
| 1.51376974320943e-06 | -1.70              | 0.0209066739234654  | 0 | Tie1    |
| 1.51413673414904e-06 | 0.45               | 0.0209117424353324  | 0 | Ddost   |
| 1.51542627069042e-06 | -0.764850559216914 | 0.0209295522245054  | 0 | Kcnmb1  |
| 1.59646500610047e-06 | -1.95              | 0.0220487781992536  | 0 | Stab1   |

|                      |                    |                    |   |             |
|----------------------|--------------------|--------------------|---|-------------|
| 1.62339983136438e-06 | -0.787126319376538 | 0.0224207750709735 | 0 | Phldb2      |
| 1.62800604209839e-06 | -0.320698063450097 | 0.0224843914474208 | 0 | Vim         |
| 1.69593512337269e-06 | -1.36              | 0.0234225599889003 | 0 | Ptprb       |
| 1.7317794017353e-06  | 0.671114465560063  | 0.0239176053173662 | 0 | Igfbp6      |
| 1.75361060278634e-06 | 0.336058478165391  | 0.0242191160350822 | 0 | Pdia3       |
| 1.78784418977847e-06 | -0.748080741794056 | 0.0246919161050305 | 0 | Flnb        |
| 1.95278291699851e-06 | 1.03               | 0.0269698848666664 | 0 | Wisp2       |
| 1.98811320023297e-06 | -0.808008825047034 | 0.0274578314084176 | 0 | Dstn        |
| 2.0240154473705e-06  | -0.466633130285766 | 0.0279536773436339 | 0 | Aplp2       |
| 2.11595454937376e-06 | -0.822701804790141 | 0.029223448281401  | 0 | Sfxn3       |
| 2.14141382268092e-06 | 0.394677510494168  | 0.0295750663050462 | 0 | Pbx1        |
| 2.14780843967342e-06 | 0.363331102421946  | 0.0296633823603296 | 0 | Cebpb       |
| 2.18717740460402e-06 | 0.38               | 0.0302071071349861 | 0 | Ctsz        |
| 2.21250646288582e-06 | 1.03               | 0.0305569267589161 | 0 | Mpg         |
| 2.26123116339036e-06 | 0.785892051696547  | 0.0312298635975842 | 0 | Flt3l       |
| 2.43771862501665e-06 | 0.845644287672594  | 0.0336673319301049 | 0 | Fst         |
| 2.4571420308807e-06  | 0.772609132840955  | 0.0339355885884934 | 0 | Ntrk2       |
| 2.49118156561202e-06 | -0.615476355216175 | 0.0344057086026676 | 0 | Tgfb1       |
| 2.50294707197644e-06 | -0.812002500603307 | 0.0345682020110666 | 0 | Hspb2       |
| 2.59186192294107e-06 | -0.926686681762644 | 0.0357962050177392 | 0 | Crim1       |
| 2.6033049485424e-06  | -1.31              | 0.0359542446443191 | 0 | Rgs4        |
| 2.61950983607057e-06 | -0.521890006114694 | 0.0361780503459707 | 0 | Sypl        |
| 2.66055565112729e-06 | -1.18              | 0.036744934097719  | 0 | 2900026A02F |
| 2.69589258372064e-06 | 0.750344361151981  | 0.0372329724737658 | 0 | Col8a2      |
| 2.72318203487765e-06 | -0.866390579513155 | 0.0376098670836952 | 0 | Cmip        |
| 2.79145697701475e-06 | -0.533442329158931 | 0.0385528123095507 | 0 | Hspb1       |
| 2.91205992122902e-06 | -0.436519471396339 | 0.040218459572094  | 0 | Nek9        |
| 0.00                 | -1.11              | 0.0412334493289828 | 0 | Susd5       |
| 3.00811593704102e-06 | -0.844126965135679 | 0.0415450892064735 | 0 | Cdc42ep3    |
| 3.20015828438046e-06 | 0.91               | 0.0441973860655786 | 0 | Prss12      |
| 3.21582153043887e-06 | 0.821069724073539  | 0.0444137111568912 | 0 | Sfrp4       |
| 3.25203520211807e-06 | -0.651743187252763 | 0.0449138581764527 | 0 | Btg1        |
| 3.43179027684794e-06 | -0.678614068551395 | 0.0473964555135469 | 0 | Kank1       |
| 3.45622507017313e-06 | -0.651391578037937 | 0.047733924444161  | 0 | Tgm2        |
| 3.57013679581789e-06 | -0.76              | 0.0493071592870409 | 0 | Pbxip1      |
| 3.6299953044243e-06  | -0.749590593247228 | 0.050133865149404  | 0 | Rhog        |
| 4.07740693668704e-06 | 0.339394108403063  | 0.0563130672025847 | 0 | Rpn2        |
| 4.10468710888288e-06 | -0.686804503323013 | 0.0566898336607814 | 0 | Id1         |
| 4.13591171961501e-06 | -1.19              | 0.057121076759603  | 0 | Uchl1       |
| 4.1880418245579e-06  | -0.919305606589236 | 0.0578410456389692 | 0 | Ptpla       |
| 4.54624266500626e-06 | -1.03              | 0.0627881574464015 | 0 | Rcan1       |
| 4.79247439914027e-06 | -0.410591144119959 | 0.0661888639265263 | 0 | Crip2       |
| 4.81883513535936e-06 | -1.20              | 0.0665529320544481 | 0 | Cspg4       |
| 4.82339933705725e-06 | 0.319842645590037  | 0.0666159682440977 | 0 | Il33        |
| 4.90338244334548e-06 | -0.817148562133745 | 0.0677206149250445 | 0 | Itga5       |
| 4.93644661958442e-06 | -0.697965244907626 | 0.0681772642630805 | 0 | Gstk1       |
| 5.03215265249228e-06 | -0.764572691028077 | 0.0694990602835709 | 0 | Gucy1a3     |
| 5.13649760855528e-06 | -0.403785056639439 | 0.070940168471757  | 0 | Eif6        |
| 5.19354445228041e-06 | 0.67               | 0.0717280424304447 | 0 | Mrc2        |
| 5.4792685010863e-06  | -0.590336797791403 | 0.0756741772685028 | 0 | Coro1c      |
| 5.6554502937629e-06  | 0.291637553646146  | 0.0781074240071594 | 0 | Atf4        |
| 5.77854639849217e-06 | 0.93               | 0.0798075043095753 | 0 | Tspan11     |
| 5.80457412577149e-06 | -1.99              | 0.08               | 0 | Icam2       |
| 6.51705043784689e-06 | -0.736215019719654 | 0.0900069835971034 | 0 | Marveld1    |
| 6.79410139785809e-06 | -1.20              | 0.0938333344058181 | 0 | Sost        |
| 7.12859316121104e-06 | 0.910516550413663  | 0.0984530001494857 | 0 | Slc22a17    |

|                      |                    |                    |   |             |
|----------------------|--------------------|--------------------|---|-------------|
| 7.23462212149688e-06 | -1.56              | 0.0999173661199934 | 0 | Selp        |
| 7.25999169174386e-06 | -0.644389977751488 | 0.100267745254674  | 0 | Sdhhd       |
| 7.34952891172821e-06 | 0.925299157704718  | 0.101504343799878  | 0 | Gria4       |
| 7.38495255255495e-06 | -0.387377103323817 | 0.101993579703336  | 0 | Trim47      |
| 7.50617637661849e-06 | -0.389427146641548 | 0.103667801937478  | 0 | Tagln2      |
| 0.00                 | 0.338194448641404  | 0.105432105695575  | 0 | Ctsh        |
| 7.68923892739167e-06 | -0.623226084390234 | 0.106196078826206  | 0 | Dhrs3       |
| 7.80295024004705e-06 | -1.05              | 0.11               | 0 | Cytl1       |
| 8.64594712480789e-06 | 0.859875133604798  | 0.119409175740722  | 0 | Enpp3       |
| 8.71920430911983e-06 | -0.478203327335583 | 0.120420930713254  | 0 | Hes1        |
| 1.02144773800665e-05 | -0.516186281724379 | 0.141072147096099  | 0 | Hip1        |
| 1.03027810618164e-05 | 0.591742515660465  | 0.142291709244747  | 0 | Kazald1     |
| 1.07081900471266e-05 | -0.514212206757569 | 0.147890812740866  | 0 | Tm4sf1      |
| 1.17044381251207e-05 | 0.495586475576504  | 0.161649994946042  | 0 | Daam1       |
| 1.17169127340382e-05 | 0.620895721299361  | 0.161822281769801  | 0 | Ptprd       |
| 1.29416437699226e-05 | -1.53              | 0.18               | 0 | Pecam1      |
| 1.31845685742133e-05 | 0.40               | 0.18               | 0 | Adam22      |
| 1.35635474018922e-05 | -1.92              | 0.187326153167534  | 0 | Bmx         |
| 1.41784822594923e-05 | -0.808755740850134 | 0.195819018485848  | 0 | Nxn         |
| 1.46638444392398e-05 | 0.600475788961782  | 0.202522355550341  | 0 | Gns         |
| 1.50362969635323e-05 | -0.501529882892509 | 0.207666297363345  | 0 | Kcnma1      |
| 1.52524042328944e-05 | 0.581985517083789  | 0.210650954860505  | 0 | Herpud1     |
| 1.54028970126331e-05 | 0.594537263684968  | 0.212729410641476  | 0 | Nbl1        |
| 1.5942393231846e-05  | 0.936970088834794  | 0.220180392925025  | 0 | Chst2       |
| 1.59855598421489e-05 | -1.26              | 0.220776566979918  | 0 | Ldb3        |
| 1.60501671871438e-05 | -1.31              | 0.221668859021643  | 0 | Parm1       |
| 1.63019988345459e-05 | -1.32              | 0.225146905903914  | 0 | E030013119R |
| 1.65703342546699e-05 | -1.03              | 0.228852886391246  | 0 | Atp8b1      |
| 1.68734381987193e-05 | -1.50              | 0.233039054962512  | 0 | Gm13889     |
| 1.69244025160208e-05 | -0.541617637560429 | 0.233742923148764  | 0 | Il1r1       |
| 1.70135269562058e-05 | -0.77              | 0.234973820792158  | 0 | Smarcd3     |
| 1.7505184224854e-05  | -0.606898615811739 | 0.241764099329459  | 0 | Pdcl3       |
| 1.97023286391581e-05 | -0.945351742011897 | 0.272108860835412  | 0 | Notch1      |
| 1.97864169412098e-05 | 0.296334738581938  | 0.273270204375048  | 0 | Mmp3        |
| 2.20564540410267e-05 | -1.47              | 0.30               | 0 | Fbxo32      |
| 2.24769764939259e-05 | 0.568242291311789  | 0.31               | 0 | Medag       |
| 2.32248803981978e-05 | -0.564327992970032 | 0.32               | 0 | Fam71a      |
| 2.37960310429556e-05 | 0.668707291751086  | 0.328646984734259  | 0 | Cacna1g     |
| 2.53237825528611e-05 | 0.733473979570368  | 0.349746760837565  | 0 | Mfap2       |
| 2.53354645673957e-05 | -0.868659619420643 | 0.349908101140302  | 0 | Mob2        |
| 2.63645920418875e-05 | -1.38              | 0.364121380690508  | 0 | Rgs7bp      |
| 2.65082112045405e-05 | -0.366222447892031 | 0.366104904945908  | 0 | Cyb5r3      |
| 2.65204433688568e-05 | 0.37               | 0.366273843367282  | 0 | S100a10     |
| 2.66365131466917e-05 | -0.920696139800994 | 0.367876883068959  | 0 | Ptprj       |
| 2.71176812507574e-05 | -0.503504396067904 | 0.37               | 0 | Rassf3      |
| 2.72066510952416e-05 | 0.707940281696932  | 0.375751058276382  | 0 | Ank2        |
| 2.91955999389133e-05 | -0.57              | 0.403220430756332  | 0 | Vcl         |
| 2.98773102359757e-05 | 0.801868534872112  | 0.41               | 0 | Abca8b      |
| 3.01689885701904e-05 | -0.624162199771044 | 0.42               | 0 | Sfrp1       |
| 3.07705789380506e-05 | 0.785532393620295  | 0.424972465713416  | 0 | Igsf10      |
| 3.12843416570333e-05 | 0.515831075606791  | 0.432068042625287  | 0 | Cbx5        |
| 3.15359808563496e-05 | 0.389620142966921  | 0.435543431607044  | 0 | Sdf4        |
| 3.27866654755613e-05 | -0.392411568281605 | 0.452816636882976  | 0 | Pfdn1       |
| 3.31383465318368e-05 | 0.851074240289992  | 0.457673703951197  | 0 | Rnf144a     |
| 3.38789764813469e-05 | -0.534170421842087 | 0.467902544183882  | 0 | Slc25a39    |
| 3.59843729358246e-05 | -0.681399742702175 | 0.496980174616674  | 0 | Uhrf1bp1l   |

|                      |                    |                   |   |             |
|----------------------|--------------------|-------------------|---|-------------|
| 3.60250256122508e-05 | 0.549066803395676  | 0.497541628730795 | 0 | Pik3r1      |
| 3.67441845990067e-05 | -1.35              | 0.507473933496882 | 0 | Ctla2a      |
| 3.68995286139514e-05 | -0.592872785381884 | 0.509619389687282 | 0 | Agm         |
| 3.88192990645759e-05 | -0.452666348460013 | 0.536133339380858 | 0 | Bnip2       |
| 4.08964614923107e-05 | -0.643606092192681 | 0.564821029670303 | 0 | Abl2        |
| 4.14388342563639e-05 | -0.501706619531278 | 0.572311739914642 | 0 | Map2k3      |
| 4.17234314630768e-05 | 0.792679538017593  | 0.576242311936553 | 0 | Hlf         |
| 4.18830824092573e-05 | 0.764303547817119  | 0.578447251154253 | 0 | Col4a3      |
| 4.28178548879319e-05 | -0.735787963907802 | 0.591357393857227 | 0 | Rnf150      |
| 4.28865362503219e-05 | -0.709742992044346 | 0.592305952153196 | 0 | Arl4a       |
| 4.35265086449244e-05 | -0.965307380081205 | 0.601144610895051 | 0 | Arl6ip5     |
| 4.45849075795308e-05 | 0.574059162962882  | 0.62              | 0 | Mlec        |
| 4.50819438489146e-05 | 0.663851392976331  | 0.62              | 0 | Dact1       |
| 4.53678987607666e-05 | -0.36              | 0.626576049784948 | 0 | Psmd8       |
| 4.58833600029523e-05 | 0.325338354829256  | 0.633695085000774 | 0 | Tmed10      |
| 4.64930201816446e-05 | 0.855788716981328  | 0.642115101728694 | 0 | Heph        |
| 4.65580568076488e-05 | 0.404097305952636  | 0.643013322570437 | 0 | Itm2c       |
| 4.78456441385169e-05 | -1.91              | 0.660796191197057 | 0 | Cdh5        |
| 4.80178551072426e-05 | 0.616814858845533  | 0.663174596886128 | 0 | Cacna2d3    |
| 4.86911409706774e-05 | 0.637492466896491  | 0.672473347946026 | 0 | Fmn12       |
| 5.05994034386219e-05 | -1.91              | 0.698828360890807 | 0 | Ptpnz1      |
| 5.16139860306844e-05 | -0.527837965352239 | 0.712840761069782 | 0 | Atp2b4      |
| 5.20296872721653e-05 | 0.353732167254629  | 0.718582010915874 | 0 | Nr3c1       |
| 5.22427380587309e-05 | -1.36              | 0.721524455329132 | 0 | Actg2       |
| 5.30187455238497e-05 | 0.491368293863049  | 0.732241894429888 | 0 | Gaa         |
| 5.3026278176475e-05  | -0.832564640554798 | 0.732345927895297 | 0 | Ier5l       |
| 5.30535903210503e-05 | 0.341287145779734  | 0.732723135924026 | 0 | Stat3       |
| 5.43221890779248e-05 | -1.24              | 0.750243753355219 | 0 | Tnfaip2     |
| 5.52824437276162e-05 | 0.634331291868843  | 0.763505830322107 | 0 | Mxra7       |
| 5.5971955245059e-05  | 0.675838298073134  | 0.77              | 0 | Thy1        |
| 5.67220081629629e-05 | 0.797951553230519  | 0.783387654738681 | 0 | Rftn1       |
| 5.80884174377025e-05 | -0.438396163810284 | 0.802259133232109 | 0 | Zfp704      |
| 5.90287331611711e-05 | -0.500052254133833 | 0.815245833688934 | 0 | Fam3c       |
| 6.30615911385776e-05 | 0.668882518204708  | 0.870943635214896 | 0 | Reck        |
| 6.36542821560485e-05 | -0.491550203939648 | 0.879129290857186 | 0 | 0610010K14f |
| 6.51033840443017e-05 | -0.757402581713422 | 0.899142837035851 | 0 | Perp        |
| 6.53699044539041e-05 | -0.345022942757876 | 0.902823750412869 | 0 | Adarb1      |
| 6.58460442080776e-05 | 0.593119936972311  | 0.91              | 0 | Tnfsf12     |
| 6.78335273389042e-05 | 0.369029968546746  | 0.936848846077605 | 0 | Thbd        |
| 6.86812540062324e-05 | -0.455934034679284 | 0.948556799080076 | 0 | Capzb       |
| 6.95799030314519e-05 | 0.374891891542713  | 0.960968040767382 | 0 | Adamts5     |
| 7.04707140766304e-05 | 0.568978686907931  | 0.973271032112343 | 0 | Slc29a3     |
| 7.09675164729136e-05 | 0.378230007934966  | 0.98              | 0 | Frmf6       |
| 7.21056603898155e-05 | -0.575817891217621 | 0.995851275643741 | 0 | Cops6       |
| 7.27167448067703e-05 | 0.72               | 1.00              | 0 | Gnptg       |
| 7.32342845244491e-05 | 0.460383005968742  | 1.00              | 0 | Prdx4       |
| 7.38628933363363e-05 | -1.27              | 1.00              | 0 | Gucy1b3     |
| 7.53644905135428e-05 | -0.470056349616899 | 1.00              | 0 | Gbp2        |
| 7.65166379356428e-05 | -0.921795127806601 | 1.00              | 0 | Isyna1      |
| 7.76430688723798e-05 | -0.951821635952526 | 1.00              | 0 | Nov         |
| 7.93768962478289e-05 | -1.03              | 1.00              | 0 | Osbpl3      |
| 8.11891156169152e-05 | -0.487539751083435 | 1.00              | 0 | Uba1        |
| 8.18783344972479e-05 | -0.659361978297578 | 1.00              | 0 | Ece1        |
| 8.25770815869159e-05 | -0.783063617442301 | 1.00              | 0 | Dmpk        |
| 8.85573946076735e-05 | -0.505683471217254 | 1.00              | 0 | Filip1l     |
| 8.89912174705257e-05 | -1.08              | 1.00              | 0 | Sorbs2      |



|                      |                    |      |   |          |
|----------------------|--------------------|------|---|----------|
| 9.14800505183577e-05 | -1.50              | 1.00 | 0 | Edn1     |
| 9.24394397381538e-05 | -1.01              | 1.00 | 0 | Rgs2     |
| 9.30450912267451e-05 | -0.525981908886757 | 1.00 | 0 | Fermt2   |
| 9.34996440747248e-05 | -0.625865592291001 | 1.00 | 0 | Fads3    |
| 0.00010026016991919  | 0.920167433320436  | 1.00 | 0 | Ptgfr    |
| 0.000100676578953695 | 0.924414294278833  | 1.00 | 0 | Tmeff2   |
| 0.000101323050773963 | 0.43               | 1.00 | 0 | Pdpm     |
| 0.000101658803554413 | -0.717360102924501 | 1.00 | 0 | Sgk1     |
| 0.000104074520732245 | 0.630229188853047  | 1.00 | 0 | N4bp2    |
| 0.000108250546671912 | -1.62              | 1.00 | 0 | Ramp1    |
| 0.000110036766227316 | 0.730689447888844  | 1.00 | 0 | Kif1a    |
| 0.00011015957574905  | 0.469876995489511  | 1.00 | 0 | Ergic3   |
| 0.000110581236693602 | -0.743763212424915 | 1.00 | 0 | Tppp3    |
| 0.000111175854586388 | -0.440774450475999 | 1.00 | 0 | Gnl3     |
| 0.000112787574371114 | -0.558279801518893 | 1.00 | 0 | Adam10   |
| 0.000115089085831675 | -0.750338628375341 | 1.00 | 0 | Sept9    |
| 0.000116890296898588 | 0.566010483981273  | 1.00 | 0 | Dpp7     |
| 0.000118668525289715 | 0.779139552049135  | 1.00 | 0 | Rasa3    |
| 0.000119014723111133 | 0.251756304926956  | 1.00 | 0 | Fkbp2    |
| 0.000122923662572143 | -0.320924131955002 | 1.00 | 0 | Rock2    |
| 0.000123589681973368 | -1.77              | 1.00 | 0 | Nos3     |
| 0.000125335301171158 | 0.310887403761695  | 1.00 | 0 | Npc2     |
| 0.000127650208225536 | -0.659025440495966 | 1.00 | 0 | Zak      |
| 0.00012784915599489  | 0.364672181028754  | 1.00 | 0 | Glul     |
| 0.000129555351275653 | -0.410867546315902 | 1.00 | 0 | Cox5a    |
| 0.000137127217903824 | -0.508820160620055 | 1.00 | 0 | Csrp2    |
| 0.000137195882111117 | -0.402915177534791 | 1.00 | 0 | Gpx1     |
| 0.00013846685378327  | -0.61              | 1.00 | 0 | lvns1abp |
| 0.000139433063924311 | -0.442580014544969 | 1.00 | 0 | Sar1b    |
| 0.000141163294790488 | -0.896987494582183 | 1.00 | 0 | Mgat4a   |
| 0.000142140801461062 | -0.490798517793897 | 1.00 | 0 | Slk      |
| 0.000148132782916758 | -0.479372706637716 | 1.00 | 0 | Lrrfip1  |
| 0.00014860619571083  | -0.412392340843842 | 1.00 | 0 | Frzb     |
| 0.000149394267504339 | 0.439343612159043  | 1.00 | 0 | Ifit2    |
| 0.000153029034637855 | 0.491586678822072  | 1.00 | 0 | Dnm1     |
| 0.000153333318577334 | 0.272112852345085  | 1.00 | 0 | Ski      |
| 0.000153881080335343 | 0.710631693383626  | 1.00 | 0 | Atp1b1   |
| 0.000155623886957254 | 0.285103650697605  | 1.00 | 0 | Ddr2     |
| 0.000156742468303082 | 0.520424125796725  | 1.00 | 0 | H2-T23   |
| 0.000157863685747637 | -0.432731643627496 | 1.00 | 0 | Rnh1     |
| 0.000158814759006373 | -0.649622571606554 | 1.00 | 0 | Ly6c1    |
| 0.000165252649690926 | -0.772498850197054 | 1.00 | 0 | Ano1     |
| 0.000165664872598072 | -0.628661379793538 | 1.00 | 0 | Camk2g   |
| 0.000165763408662365 | -0.45              | 1.00 | 0 | Map1a    |
| 0.000170258490092068 | -1.08              | 1.00 | 0 | Tmem158  |
| 0.000170997805960964 | 0.740607945768999  | 1.00 | 0 | Ephb3    |
| 0.000172430891358394 | 0.656285726466946  | 1.00 | 0 | Lgi2     |
| 0.000173854424683953 | -0.956295016889737 | 1.00 | 0 | Adss     |
| 0.000177831947072359 | -0.290182782350525 | 1.00 | 0 | Paics    |
| 0.000177864706589539 | 0.273478448063619  | 1.00 | 0 | Col6a2   |
| 0.000178217312733243 | -1.60              | 1.00 | 0 | Tes      |
| 0.00018634972112875  | 0.51               | 1.00 | 0 | Tceal3   |
| 0.000186798506834617 | -0.325733401430456 | 1.00 | 0 | Dazap2   |
| 0.000192351516808648 | -1.05              | 1.00 | 0 | Stom     |
| 0.000199853102674281 | -0.345019785508121 | 1.00 | 0 | Zfand3   |
| 0.000202866859660166 | -0.538191082570095 | 1.00 | 0 | Endod1   |

|                      |                    |      |   |             |
|----------------------|--------------------|------|---|-------------|
| 0.000203736966021769 | 0.48               | 1.00 | 0 | Ifnar2      |
| 0.000203907814478994 | 0.839193544427123  | 1.00 | 0 | Shc2        |
| 0.000206067649756685 | -0.466655793023908 | 1.00 | 0 | Rock1       |
| 0.000206351726435778 | 0.372571846839787  | 1.00 | 0 | Cxcl12      |
| 0.000206571282074285 | -0.292556670705687 | 1.00 | 0 | Clip3       |
| 0.000209468023317346 | 0.998362056332044  | 1.00 | 0 | Sult5a1     |
| 0.000209724227468231 | 0.752752692590915  | 1.00 | 0 | Aldh3a1     |
| 0.000219548942710317 | -0.516710440069525 | 1.00 | 0 | Wdr1        |
| 0.000220166390943701 | -0.839730959758983 | 1.00 | 0 | Dram2       |
| 0.00022061742789177  | -0.74              | 1.00 | 0 | Dpcd        |
| 0.000225845883332802 | 0.268568168603667  | 1.00 | 0 | Phlda1      |
| 0.000226009453173328 | -0.418442903308841 | 1.00 | 0 | Azin1       |
| 0.000227754573776579 | -0.59              | 1.00 | 0 | Gja1        |
| 0.000228668224839179 | -0.428711450899204 | 1.00 | 0 | Arid5b      |
| 0.000231650852190134 | -0.485780741386975 | 1.00 | 0 | Sulf1       |
| 0.000232098404581524 | -0.586717481266478 | 1.00 | 0 | Tns1        |
| 0.000234747777205553 | 0.652407295006108  | 1.00 | 0 | Abca9       |
| 0.000235968238648872 | -1.64              | 1.00 | 0 | Itgb3       |
| 0.000242392910829125 | -0.359387537162645 | 1.00 | 0 | Dnajc15     |
| 0.000243703793318897 | -0.985167303974537 | 1.00 | 0 | Smtn        |
| 0.000244586790974881 | -0.269452098561904 | 1.00 | 0 | Acly        |
| 0.000255859819742647 | 0.254023288956905  | 1.00 | 0 | Tgfb2       |
| 0.000256250179887816 | -0.60              | 1.00 | 0 | Pdlim5      |
| 0.000262034840224271 | 0.509857342191086  | 1.00 | 0 | Gprasp1     |
| 0.00026683107100846  | 0.324350587625644  | 1.00 | 0 | Mgst1       |
| 0.000273213362955657 | 0.258221883184783  | 1.00 | 0 | Tapbp       |
| 0.000277742167543976 | 0.841027174954083  | 1.00 | 0 | Zfp9        |
| 0.00027864425605195  | -1.42              | 1.00 | 0 | Ralgapa2    |
| 0.000285070780636247 | -0.719825020598255 | 1.00 | 0 | Ethe1       |
| 0.000285447633748423 | 0.255635027255607  | 1.00 | 0 | Zeb2        |
| 0.000285700263807351 | 0.567606928123354  | 1.00 | 0 | Erlec1      |
| 0.000288550145737554 | 0.291256085867756  | 1.00 | 0 | Zfp36       |
| 0.000292290078218309 | -1.17              | 1.00 | 0 | Sorl1       |
| 0.000303010476975291 | 0.925511198226763  | 1.00 | 0 | Figf        |
| 0.000303342957325081 | -0.284882327570928 | 1.00 | 0 | Cdk2ap2     |
| 0.000310397941210039 | -0.808392899371485 | 1.00 | 0 | Ap1s1       |
| 0.000321708278498161 | -0.617629840027259 | 1.00 | 0 | Rnf11       |
| 0.00032415355282384  | -0.478931793700769 | 1.00 | 0 | Ap1m1       |
| 0.00032955953704715  | -0.67              | 1.00 | 0 | Myo1e       |
| 0.00033214042974224  | -1.25              | 1.00 | 0 | Thsd4       |
| 0.00033534641039833  | -1.12              | 1.00 | 0 | Thbs1       |
| 0.000335874290537976 | -0.323115850046797 | 1.00 | 0 | S100a1      |
| 0.000347656618560922 | 0.413072248182272  | 1.00 | 0 | Rab3il1     |
| 0.000357092255582446 | -0.519729899559559 | 1.00 | 0 | Rras        |
| 0.000361351558035079 | 0.315298834148924  | 1.00 | 0 | Bmp1        |
| 0.000368208436391253 | 0.536755093311734  | 1.00 | 0 | Btbd1       |
| 0.000372821991997902 | -0.529537016822878 | 1.00 | 0 | Atp1a1      |
| 0.000373721508872909 | 0.863355466690289  | 1.00 | 0 | Smim1       |
| 0.000378020765072459 | -0.646510821312888 | 1.00 | 0 | Sbno1       |
| 0.000382067651071967 | -0.545906485748915 | 1.00 | 0 | Akap2       |
| 0.000397786406996385 | -0.333920995827664 | 1.00 | 0 | Dnaja2      |
| 0.000402320376685721 | 0.659446738467404  | 1.00 | 0 | Gpr153      |
| 0.000413761283799341 | 0.411824937079774  | 1.00 | 0 | Gstt1       |
| 0.000421390509834741 | -1.16              | 1.00 | 0 | Trf         |
| 0.000421766195899214 | 0.747340164102094  | 1.00 | 0 | 1700025G04I |
| 0.000423139326493928 | 0.749545886916048  | 1.00 | 0 | Prrg3       |

|                      |                    |      |   |             |
|----------------------|--------------------|------|---|-------------|
| 0.000426145153113482 | -0.95              | 1.00 | 0 | Myl9        |
| 0.000428438857195285 | -0.51              | 1.00 | 0 | Psmc6       |
| 0.000440675137155193 | -0.880812519962264 | 1.00 | 0 | Cxcl2       |
| 0.000446570917604927 | 0.834179205542495  | 1.00 | 0 | Tnfsf13b    |
| 0.000455050868712637 | -0.950249752642407 | 1.00 | 0 | F11r        |
| 0.000456534792378308 | -1.51              | 1.00 | 0 | Calcr1      |
| 0.000462832308494369 | 0.474854755316107  | 1.00 | 0 | Adamts10    |
| 0.000464858685670869 | -0.675586529060139 | 1.00 | 0 | Cd151       |
| 0.000466402830588903 | -0.37              | 1.00 | 0 | Tmem176b    |
| 0.000476718925660859 | -0.498236141393813 | 1.00 | 0 | Vcam1       |
| 0.000478947292201543 | -0.861279282300544 | 1.00 | 0 | Rmnd5a      |
| 0.00051050944715288  | -1.20              | 1.00 | 0 | Procr       |
| 0.000511500590706967 | 0.546166087876881  | 1.00 | 0 | Lipa        |
| 0.000515505926167288 | -0.750817703085937 | 1.00 | 0 | Tmt1        |
| 0.000526868844520274 | 1.04               | 1.00 | 0 | Npr3        |
| 0.000530423460184009 | -0.341544023190555 | 1.00 | 0 | Cand1       |
| 0.000531168074256279 | -0.555136595449595 | 1.00 | 0 | Pxdn        |
| 0.000536380316366782 | -0.509289153787521 | 1.00 | 0 | Rab8b       |
| 0.000541665699930547 | -0.565383344215361 | 1.00 | 0 | Eapp        |
| 0.000542466807286163 | -0.937201837452469 | 1.00 | 0 | Arhgef5     |
| 0.000545169625461702 | -0.383476711427396 | 1.00 | 0 | F2r         |
| 0.000548698107804948 | 0.258698321885334  | 1.00 | 0 | Lpl         |
| 0.000551026629568274 | 0.53               | 1.00 | 0 | Elmsan1     |
| 0.000551809751169637 | -1.12              | 1.00 | 0 | Trabd2b     |
| 0.000567938262612424 | 0.644824600576499  | 1.00 | 0 | 5430435G221 |
| 0.000572471531552652 | -1.62              | 1.00 | 0 | Sgcg        |
| 0.000574709772519531 | -0.858856217539724 | 1.00 | 0 | Lama5       |
| 0.000578768697270227 | -1.09              | 1.00 | 0 | Ppp1r12b    |
| 0.000581857050318817 | -0.539326163413762 | 1.00 | 0 | Sh3bgrl     |
| 0.000584053957294214 | -1.84              | 1.00 | 0 | Esam        |
| 0.000589869099512079 | -0.360353317451531 | 1.00 | 0 | Hk2         |
| 0.000609770650695211 | 0.378859733489232  | 1.00 | 0 | Lrpap1      |
| 0.000615364804778144 | 1.10               | 1.00 | 0 | Plekha4     |
| 0.000615625526496805 | -0.343174475478115 | 1.00 | 0 | Cct7        |
| 0.00061758677390453  | -0.366849926037012 | 1.00 | 0 | Flnc        |
| 0.000628908537543618 | -0.630193739683493 | 1.00 | 0 | Npr1        |
| 0.000632708528080607 | -0.502392271024046 | 1.00 | 0 | Klf2        |
| 0.00063442834263066  | 0.405032672216698  | 1.00 | 0 | Sec63       |
| 0.000637870604457109 | 1.13               | 1.00 | 0 | Vipr2       |
| 0.000639005876566138 | 0.497999738837272  | 1.00 | 0 | Prss23      |
| 0.000639633131290186 | 0.499268354136804  | 1.00 | 0 | Camk2n1     |
| 0.000641133532246057 | 0.683577008425744  | 1.00 | 0 | Hoxa2       |
| 0.000646766627577113 | 0.653038454153227  | 1.00 | 0 | Cdk14       |
| 0.000663808598441215 | -0.776010890988232 | 1.00 | 0 | Itga7       |
| 0.000665394074943863 | -0.866020954337089 | 1.00 | 0 | Plin2       |
| 0.000700007796349324 | 0.412789378386267  | 1.00 | 0 | Foxp2       |
| 0.000702067654708244 | -0.423894399239909 | 1.00 | 0 | Ati3        |
| 0.000705495519322198 | -0.902123745066943 | 1.00 | 0 | Unc5c       |
| 0.000713387506916209 | 0.309409270690118  | 1.00 | 0 | Ier3ip1     |
| 0.000714682228210265 | -0.569766013328173 | 1.00 | 0 | Skap2       |
| 0.000721582720118176 | -0.926280005739792 | 1.00 | 0 | Phtf2       |
| 0.00072447703482447  | 0.653832650135629  | 1.00 | 0 | H6pd        |
| 0.000726666358598031 | -0.545260273500422 | 1.00 | 0 | Nap1l4      |
| 0.000732758500956241 | -0.53              | 1.00 | 0 | Ict1        |
| 0.000744488139628265 | -0.358155267895479 | 1.00 | 0 | Gm12338     |
| 0.000751630696692859 | 0.668684269770849  | 1.00 | 0 | Uap1l1      |

|                      |                    |      |   |             |
|----------------------|--------------------|------|---|-------------|
| 0.000767890314618891 | -0.470237296615151 | 1.00 | 0 | 4833439L19F |
| 0.000773948622537096 | -0.362542898260834 | 1.00 | 0 | Iqgap1      |
| 0.000781525954999574 | 0.694439005697314  | 1.00 | 0 | Lrig3       |
| 0.000786803136696772 | -0.318566178236071 | 1.00 | 0 | Cox17       |
| 0.000806265320973801 | -0.817153530381672 | 1.00 | 0 | Lmod1       |
| 0.00080664238062771  | -0.252407210018054 | 1.00 | 0 | Calm1       |
| 0.000814604201793993 | 0.307395041375271  | 1.00 | 0 | Olfml2b     |
| 0.000816546797364251 | -0.274190921171932 | 1.00 | 0 | Stra13      |
| 0.000820087988011748 | -0.582545443098538 | 1.00 | 0 | Hk1         |
| 0.000831454302500769 | -0.816230386789578 | 1.00 | 0 | Gnptab      |
| 0.000841404186267296 | -0.54              | 1.00 | 0 | Sugt1       |
| 0.000843837577123699 | -0.322511929347933 | 1.00 | 0 | Upf2        |
| 0.000847109321351505 | 0.398065007270485  | 1.00 | 0 | Stk17b      |
| 0.000858179464569046 | -0.33              | 1.00 | 0 | Eif3i       |
| 0.000863874176844364 | -0.451236680646999 | 1.00 | 0 | Emc8        |
| 0.000874086041617453 | 0.516790757822408  | 1.00 | 0 | Ripk1       |
| 0.000880744020537145 | -0.507489721442693 | 1.00 | 0 | Rnf20       |
| 0.000895884813514558 | -0.455231077686287 | 1.00 | 0 | Cct6a       |
| 0.000911136686054844 | 0.48               | 1.00 | 0 | Cdh11       |
| 0.000912319309166584 | -0.35              | 1.00 | 0 | Stk24       |
| 0.000912790541460882 | -0.569521962760806 | 1.00 | 0 | Lrrc8a      |
| 0.000917027605564495 | -0.903610893016433 | 1.00 | 0 | Polr1c      |
| 0.000930084741985556 | 0.63               | 1.00 | 0 | Adamtsl5    |
| 0.000944780410776298 | -0.74              | 1.00 | 0 | Zfp664      |
| 0.000985269422265203 | -0.39              | 1.00 | 0 | Ebna1bp2    |
| 0.000987206310621143 | -0.293279516675244 | 1.00 | 0 | Dhx9        |
| 0.00099091990978871  | -0.637534747743501 | 1.00 | 0 | Me1         |
| 0.00102445821402015  | -0.381626982621565 | 1.00 | 0 | Efna5       |
| 0.00103440633509486  | -0.396673955499532 | 1.00 | 0 | Nus1        |
| 0.00105449337984745  | 0.497267639764534  | 1.00 | 0 | Rbms1       |
| 0.00105867592935796  | 0.33               | 1.00 | 0 | Manf        |
| 0.00106931051029447  | 0.598692819744137  | 1.00 | 0 | Pcnp        |
| 0.00106953840343448  | 0.457803133719793  | 1.00 | 0 | Creb3l1     |
| 0.00107904727687684  | 0.460089093600824  | 1.00 | 0 | Mmp14       |
| 0.00108485944980676  | -0.294486575719798 | 1.00 | 0 | Ssu72       |
| 0.00109504876127133  | 0.527908823371411  | 1.00 | 0 | Hyou1       |
| 0.00111703458580108  | -0.586679248010785 | 1.00 | 0 | 1110008P14F |
| 0.00113240173285839  | -0.424048458262675 | 1.00 | 0 | Ndufa4      |
| 0.00113266663749459  | -0.51              | 1.00 | 0 | Mob4        |
| 0.00113924663150554  | -0.426007079799144 | 1.00 | 0 | Sh3glb2     |
| 0.0011478662033613   | -1.35              | 1.00 | 0 | Ccl2        |
| 0.00115430552096513  | 0.947815723246543  | 1.00 | 0 | Mn1         |
| 0.0011571351336638   | 0.801047404403092  | 1.00 | 0 | Hic1        |
| 0.00116487644488918  | -0.66              | 1.00 | 0 | Fam63b      |
| 0.00116760079626576  | 0.300173854371094  | 1.00 | 0 | Lima1       |
| 0.00117640358526878  | -0.45              | 1.00 | 0 | Emp2        |
| 0.0011828231810272   | -0.59              | 1.00 | 0 | Spon1       |
| 0.00120728986913086  | -0.433662604938368 | 1.00 | 0 | Cacna2d1    |
| 0.00121314590447028  | -0.416224457217074 | 1.00 | 0 | Nmt2        |
| 0.00121429224844806  | -0.317062238301357 | 1.00 | 0 | Ube2j1      |
| 0.00122214325414263  | -0.42              | 1.00 | 0 | Tcp1        |
| 0.00122932328370996  | 0.461742722746604  | 1.00 | 0 | Cnpy2       |
| 0.00123408280523787  | 0.569101935555433  | 1.00 | 0 | Igsf3       |
| 0.0012395405318632   | 0.300484198072113  | 1.00 | 0 | Alg11       |
| 0.00125940876429687  | -0.698812918095623 | 1.00 | 0 | Ppp2r2a     |
| 0.00128762495586688  | -0.605722858201181 | 1.00 | 0 | Fam219b     |



|                     |                    |      |   |             |
|---------------------|--------------------|------|---|-------------|
| 0.00130360067001917 | -0.318485394266694 | 1.00 | 0 | Ypel5       |
| 0.00131428100455186 | 0.454551838182199  | 1.00 | 0 | Atraid      |
| 0.00131899224292989 | 0.831102899449662  | 1.00 | 0 | Spry1       |
| 0.00132118570983022 | -0.513599180049137 | 1.00 | 0 | Hoxa5       |
| 0.00132626919024556 | -0.377281989773163 | 1.00 | 0 | Pkm         |
| 0.00139094949564893 | -0.361162186067664 | 1.00 | 0 | Lama4       |
| 0.00141220365770486 | -0.594384362133345 | 1.00 | 0 | Gid4        |
| 0.00142275232630871 | -0.702220570477765 | 1.00 | 0 | Cited2      |
| 0.00143878799119659 | -0.464773709300587 | 1.00 | 0 | Actr3       |
| 0.00144156303387568 | 0.724512513491784  | 1.00 | 0 | Plekhf1     |
| 0.00146245756135373 | -1.11              | 1.00 | 0 | 5930403L14F |
| 0.00147359053753429 | -0.394120971705485 | 1.00 | 0 | Tmem30a     |
| 0.00148395562685043 | 0.720733102364514  | 1.00 | 0 | Cpeb1       |
| 0.00149595717865991 | 0.794047274082442  | 1.00 | 0 | Fancc       |
| 0.00150309155698069 | -0.677812790109025 | 1.00 | 0 | Mndal       |
| 0.00151872766206241 | -1.66              | 1.00 | 0 | Car8        |
| 0.00153225039290945 | -1.62              | 1.00 | 0 | Rbpms2      |
| 0.00153575899615099 | 0.709783370657992  | 1.00 | 0 | Gpc3        |
| 0.00154119337783608 | -1.61              | 1.00 | 0 | Net1        |
| 0.00154187034024101 | 0.586280679851439  | 1.00 | 0 | C2          |
| 0.00155285015496275 | -0.317071397529967 | 1.00 | 0 | Zc3h14      |
| 0.0015548536764976  | -1.49              | 1.00 | 0 | Adh7        |
| 0.00156115525908339 | -0.699056749472969 | 1.00 | 0 | Ppa1        |
| 0.00160522618998708 | 0.645720048499622  | 1.00 | 0 | Tssc1       |
| 0.0016129990386399  | 0.664171078628135  | 1.00 | 0 | Ednra       |
| 0.00161798799072534 | -0.370440174626395 | 1.00 | 0 | Cyr61       |
| 0.00163224569935277 | -0.99              | 1.00 | 0 | Arhgef7     |
| 0.00164344610544401 | -0.468177458741308 | 1.00 | 0 | Dcaf13      |
| 0.001644988591989   | -0.461703763394051 | 1.00 | 0 | Pa2g4       |
| 0.00166448114527949 | -0.483053509292487 | 1.00 | 0 | Fxyd5       |
| 0.00168815843051495 | 0.254142551101807  | 1.00 | 0 | Nenf        |
| 0.00170431268535809 | -0.368651887234681 | 1.00 | 0 | Tmf1        |
| 0.00172248255416048 | -0.584738188318698 | 1.00 | 0 | Arhgdib     |
| 0.00173580683306268 | 0.580603925623332  | 1.00 | 0 | Uchl4       |
| 0.00174922599222322 | -0.433523440247437 | 1.00 | 0 | Ugdh        |
| 0.00174941914312854 | 0.621828453359904  | 1.00 | 0 | Foxs1       |
| 0.00176525364946358 | -0.366608108953184 | 1.00 | 0 | Nfkbib      |
| 0.00177554673411812 | 0.593283514897545  | 1.00 | 0 | Usp37       |
| 0.00178180043942569 | 0.971669634886566  | 1.00 | 0 | Lsamp       |
| 0.00180767983438159 | -0.282167149760828 | 1.00 | 0 | Pacsin2     |
| 0.00181185915923734 | 0.33               | 1.00 | 0 | Tspan31     |
| 0.00181988831062224 | 0.693534072660566  | 1.00 | 0 | Plekhh2     |
| 0.00182117034943138 | -0.904230615710371 | 1.00 | 0 | Acs1        |
| 0.0018516850622816  | 0.536860944220828  | 1.00 | 0 | Sardh       |
| 0.0018571467305743  | -0.391835403110141 | 1.00 | 0 | Polr2a      |
| 0.00188038972587536 | 0.469784319325516  | 1.00 | 0 | Tgfb3       |
| 0.00189048385014748 | 0.422843185641208  | 1.00 | 0 | Srpx        |
| 0.00191301833277083 | -0.256065983795224 | 1.00 | 0 | Srsf1       |
| 0.00191467132451033 | -0.646355815000685 | 1.00 | 0 | Ehbp11i     |
| 0.00193806319690849 | -0.581851155362864 | 1.00 | 0 | Mtus1       |
| 0.00194075375184831 | -0.44              | 1.00 | 0 | Parp14      |
| 0.00195320006442578 | 0.54               | 1.00 | 0 | Mmp16       |
| 0.0019566595712455  | -0.697341427541116 | 1.00 | 0 | Ivd         |
| 0.00196728686171582 | -1.93              | 1.00 | 0 | 1190005I06R |
| 0.00197701525517529 | -0.31              | 1.00 | 0 | Lxn         |
| 0.00197813657066743 | 0.750383903631859  | 1.00 | 0 | Ptges       |

|                     |                    |      |   |             |
|---------------------|--------------------|------|---|-------------|
| 0.00197921453015716 | -0.753406227555761 | 1.00 | 0 | Drg1        |
| 0.00198424755474478 | -0.807209160273435 | 1.00 | 0 | Pla2g16     |
| 0.00199197188655663 | 0.63               | 1.00 | 0 | Fnbp1       |
| 0.00199437595364629 | -0.675664512194911 | 1.00 | 0 | Ptgs1       |
| 0.00200495425686149 | -0.382587395418979 | 1.00 | 0 | Col4a2      |
| 0.00200908362428703 | -0.358714357690978 | 1.00 | 0 | Kpna1       |
| 0.00204677874736782 | 0.324529631631719  | 1.00 | 0 | Maged2      |
| 0.00206269500149053 | -0.547990211056174 | 1.00 | 0 | Arpc1a      |
| 0.00207456505013921 | -0.471852163130384 | 1.00 | 0 | Cald1       |
| 0.00211821769058625 | -0.61              | 1.00 | 0 | Bcl7b       |
| 0.00212712098186744 | 0.344421901103533  | 1.00 | 0 | Rnf145      |
| 0.00214403049521784 | -0.422992196218273 | 1.00 | 0 | Dnajb1      |
| 0.00214908041492701 | 0.315847733867905  | 1.00 | 0 | Cd44        |
| 0.00215121618412493 | -0.414728059817842 | 1.00 | 0 | Cpe         |
| 0.00218080115746257 | -0.299723601907971 | 1.00 | 0 | Itgb1       |
| 0.00219924586724256 | 0.269015363798262  | 1.00 | 0 | Sec61a1     |
| 0.00220562496772326 | -0.50              | 1.00 | 0 | Ext2        |
| 0.00222039737363305 | -0.443570937129518 | 1.00 | 0 | Prkacb      |
| 0.00222116674796881 | -0.557932780042906 | 1.00 | 0 | 1110008F13F |
| 0.00222398465605719 | -0.430434307032277 | 1.00 | 0 | Syng1       |
| 0.00223421478662655 | -0.561784711703996 | 1.00 | 0 | Gng11       |
| 0.00226476634482829 | -0.515149919038437 | 1.00 | 0 | Mrpl54      |
| 0.00227090175694675 | -0.515848289232471 | 1.00 | 0 | Elovl5      |
| 0.00228170836883689 | -0.680973739858849 | 1.00 | 0 | Aqp1        |
| 0.00232493430800797 | -0.645624007013117 | 1.00 | 0 | 4931406P16F |
| 0.0024028380858613  | -0.265212208328984 | 1.00 | 0 | Pop5        |
| 0.00241518198939328 | 0.495859035141144  | 1.00 | 0 | Tmem218     |
| 0.00241575302247905 | -0.297030574391682 | 1.00 | 0 | Cox6a1      |
| 0.00242724934729681 | 0.841456769469007  | 1.00 | 0 | Tshz2       |
| 0.00244968518158657 | -0.75              | 1.00 | 0 | Tmem38b     |
| 0.00246624508775044 | -0.403603610173034 | 1.00 | 0 | Scoc        |
| 0.00250226607245567 | -0.295568296120639 | 1.00 | 0 | Prps2       |
| 0.00254538235146231 | -0.638752018867447 | 1.00 | 0 | 1110058L19F |
| 0.00260493609202612 | 0.414398540500617  | 1.00 | 0 | Mettl9      |
| 0.00260948590208135 | -0.370322725174949 | 1.00 | 0 | Plin4       |
| 0.00262436179176565 | 0.578568525762074  | 1.00 | 0 | Athl1       |
| 0.00265874023879261 | -0.609602762880221 | 1.00 | 0 | Mknk2       |
| 0.00266667382641542 | 0.675523053439529  | 1.00 | 0 | Adcy7       |
| 0.00267904432896771 | 0.538273309463069  | 1.00 | 0 | Ptpkr       |
| 0.00269778262223266 | -0.836237499283535 | 1.00 | 0 | Tspan9      |
| 0.00270351752092262 | -1.11              | 1.00 | 0 | Serpini1    |
| 0.00271393930865013 | -0.410735354240625 | 1.00 | 0 | Cab39       |
| 0.00272208865406455 | 0.486255809535813  | 1.00 | 0 | Ikbip       |
| 0.00277370404188688 | -0.406762743442046 | 1.00 | 0 | Ddx42       |
| 0.00278104487659413 | -0.278554855293625 | 1.00 | 0 | Macf1       |
| 0.00278277266449068 | -0.365550642452189 | 1.00 | 0 | Gltscr2     |
| 0.00279841416273639 | -1.20              | 1.00 | 0 | Sncg        |
| 0.00280001856848882 | -1.60              | 1.00 | 0 | Gja4        |
| 0.00284369998536659 | -0.471513550502574 | 1.00 | 0 | Lamtor3     |
| 0.00284428969079831 | -0.620908753697099 | 1.00 | 0 | Alcam       |
| 0.00285431595162971 | 0.849166573303521  | 1.00 | 0 | Ift88       |
| 0.00286238070404754 | 0.293393109825436  | 1.00 | 0 | Nav1        |
| 0.00286518850876461 | -0.308345079379292 | 1.00 | 0 | Ptgis       |
| 0.00286924223025285 | 0.372914170961829  | 1.00 | 0 | Sec61b      |
| 0.00287821804807479 | -0.357150591970693 | 1.00 | 0 | Hif1a       |
| 0.00289512332247093 | 0.265138199808253  | 1.00 | 0 | Arhgef10    |

|                     |                    |      |   |             |
|---------------------|--------------------|------|---|-------------|
| 0.00299115151014835 | -0.30              | 1.00 | 0 | Capza2      |
| 0.00299566570164931 | -0.333888180976146 | 1.00 | 0 | Zfmx3       |
| 0.00300922558606042 | -0.429568948326153 | 1.00 | 0 | Peli1       |
| 0.00301145859090986 | -0.408142813540366 | 1.00 | 0 | Git2        |
| 0.00310708358188888 | 0.441823535230449  | 1.00 | 0 | Ccbe1       |
| 0.00312038979681718 | -0.272812719258766 | 1.00 | 0 | Chsy1       |
| 0.00313845013596221 | -0.989929181855517 | 1.00 | 0 | Lmo2        |
| 0.00314171565629435 | -1.36              | 1.00 | 0 | Cd24a       |
| 0.00315325244027778 | -0.546219688500142 | 1.00 | 0 | Slc11a2     |
| 0.00316958267445567 | -0.524371458507378 | 1.00 | 0 | 2510039O18I |
| 0.00317237039936143 | -0.488332876800228 | 1.00 | 0 | Msrbl       |
| 0.00317257567676242 | 0.650171535939456  | 1.00 | 0 | Lrrk1       |
| 0.00319371919770359 | -0.359886936010512 | 1.00 | 0 | 2010111I01R |
| 0.00322373880852589 | -0.730571399781895 | 1.00 | 0 | Myo9b       |
| 0.0032242596726511  | -0.499086419695469 | 1.00 | 0 | Ankrd46     |
| 0.00323716651503931 | -0.453772757077561 | 1.00 | 0 | Atxn7       |
| 0.00328999148588309 | -0.641640548398051 | 1.00 | 0 | Tbl1x       |
| 0.00336792352595907 | -0.351904983695439 | 1.00 | 0 | Dusp1       |
| 0.0034004623857945  | -0.453933228175198 | 1.00 | 0 | Eftud2      |
| 0.00341978781773448 | -0.308890709870451 | 1.00 | 0 | 2210013O21I |
| 0.00345135876269951 | -0.968257768907573 | 1.00 | 0 | Tmem2       |
| 0.00345424563182996 | -0.447710375057322 | 1.00 | 0 | Lbr         |
| 0.00352839918338302 | -1.47              | 1.00 | 0 | Palmd       |
| 0.00353450848432007 | 0.590906886797672  | 1.00 | 0 | Vwc2        |
| 0.00356499900498571 | -0.592298768651917 | 1.00 | 0 | Atp6v0a2    |
| 0.00359502788452483 | -0.339489166827263 | 1.00 | 0 | Insig2      |
| 0.00360623211276448 | 1.07               | 1.00 | 0 | Cpz         |
| 0.00361711077218855 | -0.585694811355422 | 1.00 | 0 | Slmap       |
| 0.00363180936204467 | -0.674080763402792 | 1.00 | 0 | Dtna        |
| 0.00365487148076417 | -0.677480887116481 | 1.00 | 0 | Creb5       |
| 0.00365841513805763 | -0.525629898085835 | 1.00 | 0 | Bag6        |
| 0.00371188078881718 | -0.331405130744456 | 1.00 | 0 | 4930503E24F |
| 0.00373085463783491 | 0.56               | 1.00 | 0 | Ptgir       |
| 0.00374331690801868 | -0.354182397287315 | 1.00 | 0 | Slc39a14    |
| 0.0037477699317479  | -0.803272011239891 | 1.00 | 0 | Rtfdc1      |
| 0.00376455207395338 | -0.460576313958902 | 1.00 | 0 | Pgls        |
| 0.00378024051113002 | 0.886312395677361  | 1.00 | 0 | Plcxd3      |
| 0.00379540437343775 | -0.567757004829454 | 1.00 | 0 | Phf5a       |
| 0.00380519655750272 | -0.449521981681174 | 1.00 | 0 | Mgll        |
| 0.00382212418495167 | -0.362509450825345 | 1.00 | 0 | Usp22       |
| 0.00383617944062044 | -0.929844835930594 | 1.00 | 0 | Prdm16      |
| 0.00388241254598628 | 0.960422133317933  | 1.00 | 0 | Fam174b     |
| 0.00389468638264689 | -0.555186379053267 | 1.00 | 0 | Pqlc1       |
| 0.0039423448126321  | -1.42              | 1.00 | 0 | S1pr1       |
| 0.00396557754350934 | -0.294815650180789 | 1.00 | 0 | Usf2        |
| 0.00401204888069172 | -0.372718442444102 | 1.00 | 0 | Myo1c       |
| 0.00401236077645877 | -0.268584585402904 | 1.00 | 0 | Tmx4        |
| 0.00412791970394413 | -1.53              | 1.00 | 0 | Amigo2      |
| 0.0041449379610231  | 0.590624275171521  | 1.00 | 0 | Mmp19       |
| 0.00416825688356269 | 0.462204936759917  | 1.00 | 0 | Adamts15    |
| 0.00417543353278526 | -0.456463917519206 | 1.00 | 0 | Tmbim1      |
| 0.00419500697580248 | 0.400511367754577  | 1.00 | 0 | Capn1       |
| 0.00427672616343054 | -1.28              | 1.00 | 0 | Tll7        |
| 0.00428512862535202 | -1.18              | 1.00 | 0 | Crispld1    |
| 0.00432721973971135 | -0.397135216669406 | 1.00 | 0 | Ddx24       |
| 0.00435585784720823 | 0.315101105159461  | 1.00 | 0 | Osr1        |

|                     |                    |      |   |             |
|---------------------|--------------------|------|---|-------------|
| 0.00436265390187983 | -0.787177746826628 | 1.00 | 0 | Daxx        |
| 0.00437719840895952 | -0.455639228971655 | 1.00 | 0 | Fbxo30      |
| 0.0043989828805284  | -0.441084042805058 | 1.00 | 0 | Sema3f      |
| 0.00441944287058951 | 0.51               | 1.00 | 0 | Mpp6        |
| 0.00443072446675103 | -0.375065280415964 | 1.00 | 0 | Dmd         |
| 0.00444182573963547 | 0.518649974773433  | 1.00 | 0 | Dapk2       |
| 0.00444328826561844 | -0.346589978247143 | 1.00 | 0 | Gtf2i       |
| 0.00446819042129361 | -0.792411600384774 | 1.00 | 0 | Trappc11    |
| 0.00448333572065981 | -0.486909608997584 | 1.00 | 0 | Atp6v1a     |
| 0.00448644633046711 | 0.302816456974516  | 1.00 | 0 | Cryab       |
| 0.0045241359754354  | -0.514571430264105 | 1.00 | 0 | Idnk        |
| 0.00460703402872952 | -0.551983589570475 | 1.00 | 0 | Usp15       |
| 0.00462986866955595 | -0.264288885346515 | 1.00 | 0 | Fkbp1a      |
| 0.00468657626792938 | 0.435302408480678  | 1.00 | 0 | Dtx3        |
| 0.00473446331156688 | 0.419139932216308  | 1.00 | 0 | Steap4      |
| 0.00476856179263023 | -0.473112670168933 | 1.00 | 0 | Uqcrc2      |
| 0.00478457021381012 | -0.503277265357899 | 1.00 | 0 | Vcan        |
| 0.00480318407055803 | -1.01              | 1.00 | 0 | Fli1        |
| 0.00480925737994613 | -0.618147875849097 | 1.00 | 0 | Ccdc85b     |
| 0.00482438209098681 | 0.530495190968709  | 1.00 | 0 | Fgf7        |
| 0.00484456430598364 | -0.386904700670448 | 1.00 | 0 | Sorbs1      |
| 0.0048550774634244  | -0.475503534590453 | 1.00 | 0 | 1110007C09f |
| 0.00486516593765868 | -0.59              | 1.00 | 0 | Msi2        |
| 0.00489263327987305 | 0.445774125660328  | 1.00 | 0 | Der11       |
| 0.00492154841067382 | 0.750233209665216  | 1.00 | 0 | Letm1       |
| 0.00506204132553092 | -0.742130120784978 | 1.00 | 0 | Pth1r       |
| 0.00510176753078864 | -0.486650011619296 | 1.00 | 0 | Snhg12      |
| 0.00513113429499001 | 0.406255830836172  | 1.00 | 0 | Ssh2        |
| 0.00514530419772998 | -1.14              | 1.00 | 0 | Spint2      |
| 0.00515227002914346 | 0.61               | 1.00 | 0 | Mapk8       |
| 0.00516233810888971 | 0.503877633160485  | 1.00 | 0 | Csgalnact2  |
| 0.00524219167361911 | -0.333452401233498 | 1.00 | 0 | Srsf7       |
| 0.00529782477550618 | 0.270296114275864  | 1.00 | 0 | Pla2g15     |
| 0.00530020100647295 | 0.432734703269197  | 1.00 | 0 | Creg1       |
| 0.00533088604253829 | -0.544457342365635 | 1.00 | 0 | Itga9       |
| 0.00533498077845244 | -0.542443735811052 | 1.00 | 0 | Ulk2        |
| 0.00536416512387998 | 0.387178864468797  | 1.00 | 0 | Fam102b     |
| 0.00541109627994418 | 0.414866255504188  | 1.00 | 0 | Gabra3      |
| 0.00543025900260273 | 0.484014311824095  | 1.00 | 0 | Vgll3       |
| 0.0054380866453358  | -0.388433540893045 | 1.00 | 0 | Rnpep       |
| 0.00546302882520667 | -0.598282334557263 | 1.00 | 0 | Zfp467      |
| 0.00548245063469227 | 0.599458208152165  | 1.00 | 0 | Gba         |
| 0.0054900023407109  | -0.999200492358861 | 1.00 | 0 | Tnc         |
| 0.00553522285421577 | -0.348129651348982 | 1.00 | 0 | Psmd4       |
| 0.0055373734614849  | -0.259773290602968 | 1.00 | 0 | Apc2        |
| 0.00554793606960343 | 0.419663430574029  | 1.00 | 0 | Khsrp       |
| 0.00556847292108516 | -0.52              | 1.00 | 0 | Fcf1        |
| 0.00558476560822741 | 0.293727364311896  | 1.00 | 0 | Sccpdh      |
| 0.00559113118112749 | -0.504665964001103 | 1.00 | 0 | Stk16       |
| 0.00561135923894088 | -0.620729539188963 | 1.00 | 0 | Inhba       |
| 0.00589255400745559 | -0.458766183015344 | 1.00 | 0 | Ppp3ca      |
| 0.00591192821299834 | -0.489334558049505 | 1.00 | 0 | Myc         |
| 0.0059727223539595  | 0.28               | 1.00 | 0 | Arhgef25    |
| 0.00602716478340072 | -0.72              | 1.00 | 0 | Fam214b     |
| 0.0060432923730897  | -0.382607025033795 | 1.00 | 0 | Aco2        |
| 0.00614329927347724 | 0.562717160717336  | 1.00 | 0 | Naalad2     |



|                     |                    |      |   |           |
|---------------------|--------------------|------|---|-----------|
| 0.00621706593442193 | -0.313074691613704 | 1.00 | 0 | Ugp2      |
| 0.00623062475872726 | 0.307270926170373  | 1.00 | 0 | Smdt1     |
| 0.00626407159338865 | -0.467836083974677 | 1.00 | 0 | Rbpms     |
| 0.00628153374204771 | 0.518229326783208  | 1.00 | 0 | Kirrel    |
| 0.00630185149920956 | -0.260269858894548 | 1.00 | 0 | Tmem33    |
| 0.00639035948513432 | 0.543931601175614  | 1.00 | 0 | Farp1     |
| 0.00642636100688074 | -0.362290632753307 | 1.00 | 0 | Itfg3     |
| 0.00648366283289899 | 0.486617657429802  | 1.00 | 0 | Uchl3     |
| 0.00648751136526742 | -0.511355472832484 | 1.00 | 0 | GltP      |
| 0.00648949346965368 | -0.477748487379842 | 1.00 | 0 | Zbtb41    |
| 0.00650638732757328 | 0.278234574975778  | 1.00 | 0 | Col6a3    |
| 0.0065405074287733  | -0.259352731476941 | 1.00 | 0 | Aip       |
| 0.00657149091524453 | -0.367142342909256 | 1.00 | 0 | Cs        |
| 0.00657345183350094 | -0.668030540338705 | 1.00 | 0 | Mef2c     |
| 0.00658029978180525 | 0.373170145291811  | 1.00 | 0 | Ubtd2     |
| 0.00662085854312097 | -0.402621047661544 | 1.00 | 0 | Zranb2    |
| 0.01                | -0.584316801834461 | 1.00 | 0 | Setd8     |
| 0.00670433818906913 | -0.302635467150957 | 1.00 | 0 | Ext1      |
| 0.006731634298361   | -0.59              | 1.00 | 0 | Cyld      |
| 0.00674786989573319 | -0.411419165873788 | 1.00 | 0 | Mfge8     |
| 0.00675616028222152 | 0.314726137569797  | 1.00 | 0 | Tmtc1     |
| 0.00682220264429084 | -0.404467262464647 | 1.00 | 0 | Sun2      |
| 0.00683411179985017 | -0.833157065118716 | 1.00 | 0 | Tnk2      |
| 0.0069015191185003  | -0.338487870363192 | 1.00 | 0 | Bzw1      |
| 0.00695008898969766 | -0.773169283362784 | 1.00 | 0 | Pik3r3    |
| 0.00695896963587885 | -0.781414656567246 | 1.00 | 0 | Nhs12     |
| 0.0069839654454605  | -0.68              | 1.00 | 0 | Ugcg      |
| 0.00705556291409141 | 0.338038093347474  | 1.00 | 0 | Unc119b   |
| 0.0070564610542483  | -0.490825117416134 | 1.00 | 0 | Gnl3l     |
| 0.00711433744026477 | -0.357107558209216 | 1.00 | 0 | Sgms2     |
| 0.00712528460031178 | 0.411536111412461  | 1.00 | 0 | Xbp1      |
| 0.00713528738879867 | -0.491383671910333 | 1.00 | 0 | Adipor2   |
| 0.00718655954606429 | -0.41              | 1.00 | 0 | Kars      |
| 0.00723394081635886 | -0.268730921837279 | 1.00 | 0 | Clpp      |
| 0.00731538706236375 | -0.321454897822966 | 1.00 | 0 | Zcrb1     |
| 0.00739211083731214 | -0.35              | 1.00 | 0 | Ube2h     |
| 0.00740936708875724 | -0.262287275704612 | 1.00 | 0 | Tnfrsf12a |
| 0.0074124709467038  | -0.33              | 1.00 | 0 | Plekha3   |
| 0.0074220677599028  | -0.867039136162127 | 1.00 | 0 | Ggta1     |
| 0.00744508515161956 | 0.363939502615906  | 1.00 | 0 | Ppp1r9b   |
| 0.0074949352352405  | -0.364666519056068 | 1.00 | 0 | Ssfa2     |
| 0.00759277785082914 | -0.681701600478864 | 1.00 | 0 | Smap2     |
| 0.00764242097685648 | -0.598413955468978 | 1.00 | 0 | Max       |
| 0.00764465781451282 | -0.510378735865058 | 1.00 | 0 | Pdlim4    |
| 0.00770757066246054 | -0.332110055252513 | 1.00 | 0 | Ndufa8    |
| 0.00772833381433073 | -0.768806416448376 | 1.00 | 0 | Sort1     |
| 0.00773601216339102 | -0.391478641367476 | 1.00 | 0 | Snrpd2    |
| 0.00788156271597631 | -0.377766883535214 | 1.00 | 0 | Med10     |
| 0.00790619043331038 | -0.65              | 1.00 | 0 | Cdc37l1   |
| 0.00802685365979195 | 0.839247506361947  | 1.00 | 0 | Galnt10   |
| 0.00803873184168365 | -0.85              | 1.00 | 0 | Cdk17     |
| 0.00817122665174227 | -0.477704046462447 | 1.00 | 0 | Serpine1  |
| 0.00824536580551958 | -0.33              | 1.00 | 0 | Fbxo3     |
| 0.00826879605514093 | -0.519604228138158 | 1.00 | 0 | Nek7      |
| 0.00827900883659762 | -0.262009704197266 | 1.00 | 0 | Ndufb7    |
| 0.00839284039167505 | -0.357636653484376 | 1.00 | 0 | Pcdh7     |

|                     |                    |      |   |            |
|---------------------|--------------------|------|---|------------|
| 0.0083952068930555  | 0.420733678367483  | 1.00 | 0 | Adprh      |
| 0.00839576141440629 | 0.757680521625255  | 1.00 | 0 | Aff2       |
| 0.00839758542726563 | -0.269816396561694 | 1.00 | 0 | Ccdc59     |
| 0.00843433661118836 | -0.354043294145679 | 1.00 | 0 | Ash1l      |
| 0.00843727122959191 | -0.66              | 1.00 | 0 | Ppp1r14a   |
| 0.00846452351537942 | 0.551357642190889  | 1.00 | 0 | Man1c1     |
| 0.00846715683634218 | 0.410039579889458  | 1.00 | 0 | Slc4a1ap   |
| 0.00859532758592162 | 0.515306549904251  | 1.00 | 0 | Col16a1    |
| 0.00864002801535919 | -0.291429738430784 | 1.00 | 0 | Mien1      |
| 0.00868720217049983 | 0.541325985382036  | 1.00 | 0 | Gprasp2    |
| 0.00869760972363078 | -0.279963381524016 | 1.00 | 0 | Mcmdbp     |
| 0.0087346422284031  | -0.347274378984251 | 1.00 | 0 | Wbp1       |
| 0.00892164789701131 | -0.602465183673135 | 1.00 | 0 | Plcb4      |
| 0.00896690229755899 | 0.544269889814221  | 1.00 | 0 | Hmg20a     |
| 0.00896784279413368 | -0.335650372786897 | 1.00 | 0 | Smurf2     |
| 0.00898354675924389 | 0.699665570473618  | 1.00 | 0 | Angptl1    |
| 0.00917526679244811 | 0.436274356838914  | 1.00 | 0 | Tiam1      |
| 0.00919403839566801 | 0.660429541527037  | 1.00 | 0 | Nsg1       |
| 0.00924399176128277 | -0.479523117868704 | 1.00 | 0 | Adcy5      |
| 0.00929323775459945 | -0.559900752952119 | 1.00 | 0 | 0610012G03 |
| 0.00929493410435409 | -0.793493167391214 | 1.00 | 0 | Arhgap31   |
| 0.00929960933886155 | 0.724448435573013  | 1.00 | 0 | Snai1      |
| 0.00930532076303289 | -0.424051224282053 | 1.00 | 0 | Sirt1      |
| 0.00936571851506413 | 0.333982751958828  | 1.00 | 0 | Tmem167    |
| 0.00948459584722348 | -1.57              | 1.00 | 0 | Gja5       |
| 0.00948611130677851 | -0.340803485543459 | 1.00 | 0 | Timm17a    |
| 0.00951696358791903 | 0.391867677886972  | 1.00 | 0 | Itm2a      |
| 0.00954268000105605 | -0.521270987404184 | 1.00 | 0 | Tcof1      |
| 0.00955073575172653 | -0.293312574526487 | 1.00 | 0 | Bmpr2      |
| 0.00957930213527533 | -0.417827824850847 | 1.00 | 0 | Lats2      |
| 0.00958985340971612 | 0.406465855536424  | 1.00 | 0 | Pacs2      |
| 0.00969321500239496 | -0.313836708155318 | 1.00 | 0 | Cd2ap      |
| 0.00971442567894786 | -0.596480582690406 | 1.00 | 0 | Nuak1      |
| 0.00973594471054006 | -0.723624821307218 | 1.00 | 0 | Sdpr       |
| 0.00980088328248488 | -0.355538707479331 | 1.00 | 0 | Mrpl34     |
| 0.00980858303386556 | -0.775147089639854 | 1.00 | 0 | Fam126b    |
| 0.00982141018293688 | -0.268045130797017 | 1.00 | 0 | Rnf187     |
| 0.00988296839524271 | -0.552412568457989 | 1.00 | 0 | Rnf123     |
| 0.00997902055244648 | 0.495048611329063  | 1.00 | 0 | Ptgr1      |
| 0.00998601849118786 | 0.33               | 1.00 | 0 | Ostm1      |
| 0.00999871217456201 | 0.644824600576499  | 1.00 | 0 | Twist2     |

| p_val                | avg_logFC          | p_val_adj            | cluster | gene     |
|----------------------|--------------------|----------------------|---------|----------|
| 1.0587593609494e-23  | 1.306757141        | 1.46225255340722e-19 | 1       | Ifi2712a |
| 1.85415221372658e-23 | -1.373113137       | 2.56076962237777e-19 | 1       | Myh11    |
| 1.7437901834397e-18  | -1.563770961       | 2.40834862234857e-14 | 1       | Myl9     |
| 2.7789339326123e-17  | 0.678532308082521  | 3.83798565433085e-13 | 1       | Fbln1    |
| 3.28230013383596e-17 | 0.560967605854793  | 4.53318471484084e-13 | 1       | Lum      |
| 1.1140429590991e-16  | -2.08943997        | 1.53860473081177e-12 | 1       | Pgm5     |
| 1.19554769966375e-16 | 0.600265904646242  | 1.65117092800561e-12 | 1       | Ccdc80   |
| 2.28415739610791e-16 | 0.982212205924457  | 3.15464977976464e-12 | 1       | Fxyd6    |
| 4.24275260592743e-16 | -1.535992495       | 5.85966562404637e-12 | 1       | Col18a1  |
| 3.90840809911852e-15 | -1.280648159       | 5.3979024256926e-11  | 1       | Acta2    |
| 6.40058027362119e-15 | -1.627310037       | 8.83984141589822e-11 | 1       | Smtn     |
| 8.37642618700733e-15 | 1.194744551        | 1.15686822068758e-10 | 1       | Gata4    |
| 1.14815960835269e-14 | -1.427634914       | 1.5857232350959e-10  | 1       | Cdh13    |
| 1.57204105010884e-14 | 1.784034201        | 2.17114589430532e-10 | 1       | Meox1    |
| 1.73529066571184e-14 | -0.964376283528586 | 2.39660993841463e-10 | 1       | Smoc1    |
| 5.0609226611792e-14  | 1.060157189        | 6.98964028735459e-10 | 1       | Tbx20    |
| 1.06293722502104e-13 | 0.847831987472733  | 1.46802260147656e-09 | 1       | Gpm6b    |
| 1.11714487685275e-13 | -0.746424380772212 | 1.54288878942133e-09 | 1       | Cpe      |
| 2.10998106898652e-13 | -0.839937611698111 | 2.91409485437729e-09 | 1       | Eln      |
| 2.90802166895017e-13 | -1.195401983       | 4.01626872698708e-09 | 1       | Plcb4    |
| 2.90873801019021e-13 | -1.516417461       | 4.0172580658737e-09  | 1       | Mylk     |
| 7.26268488828329e-13 | 0.446219633480976  | 1.0030494099208e-08  | 1       | Anxa2    |
| 1.19459099541229e-12 | -1.012487773       | 1.64984962376392e-08 | 1       | Fblim1   |
| 1.83510677631257e-12 | -1.055220028       | 2.53446596876529e-08 | 1       | Itga9    |
| 3.07089013270508e-12 | -1.07072297        | 4.24120636227899e-08 | 1       | Pbxip1   |
| 4.2444624326052e-12  | -1.587180636       | 5.86202706567104e-08 | 1       | Tpm2     |
| 4.44936506279641e-12 | 0.685015392243335  | 6.14501808822812e-08 | 1       | Prg4     |
| 5.27994273779696e-12 | 0.37401046         | 7.29212891517138e-08 | 1       | Pmp22    |
| 6.18613267595749e-12 | -1.581150049       | 8.54366783876488e-08 | 1       | Tagln    |
| 7.8582032297904e-12  | -1.702550379       | 1.08529644806635e-07 | 1       | Pecam1   |
| 9.60529846568109e-12 | -1.146992296       | 1.32658777109522e-07 | 1       | Dmd      |
| 1.03753398082289e-11 | -1.02758315        | 1.4329381809145e-07  | 1       | Anxa3    |
| 1.1033945160661e-11  | 0.461470059776602  | 1.52389816613889e-07 | 1       | Cd34     |
| 1.15127024888573e-11 | -0.754800892958174 | 1.59001934073609e-07 | 1       | Cald1    |
| 1.2291065964942e-11  | -1.45715373        | 1.69751912041814e-07 | 1       | Itga8    |
| 1.26740402534505e-11 | -2.217669101       | 1.75041169940404e-07 | 1       | Vwf      |
| 1.3862101958933e-11  | -0.808327557808041 | 1.91449490154823e-07 | 1       | Flna     |
| 2.03618653955148e-11 | 0.409602334615812  | 2.81217722977455e-07 | 1       | Lrp1     |
| 2.37914570755396e-11 | 0.561168602294283  | 3.28583813670277e-07 | 1       | Olfml3   |
| 2.5096096548432e-11  | -0.998177156887674 | 3.46602189430394e-07 | 1       | Cav1     |
| 2.56647987111515e-11 | -0.886530952086577 | 3.54456534999713e-07 | 1       | Ppp1r12a |
| 3.06820318913443e-11 | -1.221910737       | 4.23749542451356e-07 | 1       | Nox4     |
| 3.10819574179781e-11 | 0.769390401009204  | 4.29272913899695e-07 | 1       | Sox9     |
| 3.61351120994491e-11 | 0.389377274964023  | 4.99062033205492e-07 | 1       | Mxra8    |
| 3.61364791705778e-11 | 0.454617521207316  | 4.99080913824851e-07 | 1       | Mmp2     |
| 3.62061197932387e-11 | -2.260734569       | 5.0004272046442e-07  | 1       | Mmm2     |
| 3.78441889029086e-11 | -2.040853712       | 5.22666092938071e-07 | 1       | Tinagl1  |
| 5.68090502564036e-11 | -0.763579981711009 | 7.8458979309119e-07  | 1       | Map1b    |
| 6.06344205024411e-11 | 0.382462200327137  | 8.37421981559214e-07 | 1       | Emp1     |
| 6.4926010833837e-11  | -0.923918066613149 | 8.96693135626122e-07 | 1       | Ccdc3    |
| 7.67369106379975e-11 | -1.612056572       | 1.05981347282138e-06 | 1       | Adh1     |
| 1.31857367326264e-10 | 0.333654303629015  | 1.82108210014303e-06 | 1       | Rps18    |
| 1.50776290562901e-10 | 1.045131078        | 2.08237134896423e-06 | 1       | Epha7    |

|                      |                    |                      |   |             |
|----------------------|--------------------|----------------------|---|-------------|
| 1.87590265413668e-10 | -1.089730618       | 2.59080915562817e-06 | 1 | Limch1      |
| 3.00955064914818e-10 | -1.965612407       | 4.15649040153855e-06 | 1 | Cbr2        |
| 3.27994733632057e-10 | 0.871442151282576  | 4.52993526619235e-06 | 1 | Tcf21       |
| 3.80983182188881e-10 | 0.432347915180121  | 5.26175872921063e-06 | 1 | Shisa5      |
| 4.33707656090892e-10 | -1.733733551       | 5.98993643827132e-06 | 1 | Myom1       |
| 4.7678440586622e-10  | -1.653751845       | 6.58486942941837e-06 | 1 | Sost        |
| 5.14997943005692e-10 | -1.839405261       | 7.11263659085162e-06 | 1 | Cnn1        |
| 7.00526303118913e-10 | 0.418246128172167  | 9.6749687723753e-06  | 1 | BC048507    |
| 1.12196000250746e-09 | -1.167402943       | 1.54953895946306e-05 | 1 | Dmpk        |
| 1.21483184102773e-09 | 0.354572505202371  | 1.6778042556434e-05  | 1 | Dcn         |
| 1.23028145189296e-09 | -1.42005803        | 1.69914171320936e-05 | 1 | Mcam        |
| 1.35075287143641e-09 | -1.631207267       | 1.86552479074083e-05 | 1 | Rcan2       |
| 1.38894871229314e-09 | 0.282147145012102  | 1.91827706654806e-05 | 1 | Tmsb10      |
| 1.41118616391894e-09 | -1.426465361       | 1.94898921098845e-05 | 1 | Npnt        |
| 1.44737615866048e-09 | -1.212799985       | 1.99897121272599e-05 | 1 | Pkp4        |
| 1.6533486195921e-09  | -2.188129937       | 2.28343977851864e-05 | 1 | Ramp1       |
| 1.96070697218969e-09 | 0.801256256542982  | 2.70793239929118e-05 | 1 | Bok         |
| 2.14517217925646e-09 | 0.483282512699479  | 2.9626972967711e-05  | 1 | Serpina3n   |
| 2.52053918576557e-09 | 0.694024444476399  | 3.48111666946083e-05 | 1 | Enc1        |
| 2.59677203568056e-09 | -1.769473356       | 3.58640185847842e-05 | 1 | Actg2       |
| 3.15602051650027e-09 | -0.858692262197121 | 4.35877993533853e-05 | 1 | Tns1        |
| 3.34345620259238e-09 | -1.197123637       | 4.61764736140034e-05 | 1 | Sdpr        |
| 4.03046979628249e-09 | -0.871767245017265 | 5.56648183564574e-05 | 1 | Tgm2        |
| 4.36656360901318e-09 | -1.977187887       | 6.0306610004081e-05  | 1 | Sh3bgr      |
| 4.43802142736356e-09 | -1.744938403       | 6.12935139333181e-05 | 1 | Esam        |
| 4.76206488741811e-09 | 0.268159522788766  | 6.57688781601316e-05 | 1 | Ifitm7      |
| 4.76311099778612e-09 | -2.154297863       | 6.57833259904241e-05 | 1 | Egfl7       |
| 4.9712097701851e-09  | 0.588398462358146  | 6.86573781360264e-05 | 1 | Vcan        |
| 5.46286171623649e-09 | 0.653840082278024  | 7.54475831629422e-05 | 1 | Olfml2b     |
| 6.29277211871448e-09 | -0.609512893872926 | 8.69094757315657e-05 | 1 | Fn1         |
| 6.36703208818556e-09 | 0.341657802678561  | 8.79350801699307e-05 | 1 | Gm12060     |
| 6.48761351230296e-09 | 0.862290380262258  | 8.96004302184162e-05 | 1 | Matn2       |
| 7.10505165871285e-09 | 0.355899319890273  | 9.81278684584831e-05 | 1 | Gsn         |
| 8.02548525123903e-09 | 0.831060313418166  | 0.000110839976804862 | 1 | Ppp1r14b    |
| 8.21059879202271e-09 | 0.381434732582834  | 0.000113396579916626 | 1 | Dpt         |
| 9.73046904031518e-09 | -0.799511213858873 | 0.000134387507915793 | 1 | Utrn        |
| 1.03370840768509e-08 | 0.830938384998126  | 0.000142765468185388 | 1 | Dram1       |
| 1.0617493737817e-08  | 0.836659598069964  | 0.000146638206012991 | 1 | Srd5a3      |
| 1.07732199751467e-08 | -1.270893881       | 0.000148788941076751 | 1 | Cgnl1       |
| 1.38764338570083e-08 | -0.696809933128598 | 0.000191647427999142 | 1 | Fmo2        |
| 1.51717903086449e-08 | 0.278020408076071  | 0.000209537595952695 | 1 | Ltbp3       |
| 1.62959718491119e-08 | -0.760803531638202 | 0.000225063667208085 | 1 | Tln1        |
| 1.84129999834373e-08 | 0.312151683459183  | 0.000254301942771252 | 1 | Col3a1      |
| 2.01506467912745e-08 | 0.334032005236342  | 0.000278300582834292 | 1 | Rpl7        |
| 2.48342600141897e-08 | -1.543205278       | 0.000342985965055974 | 1 | Susd5       |
| 2.57250891107123e-08 | 0.437011361098681  | 0.000355289205708047 | 1 | Mrc2        |
| 2.90104118846937e-08 | -1.019162759       | 0.000400662798539504 | 1 | Rbp4        |
| 2.92385065779207e-08 | -0.928982523       | 0.000403813014347662 | 1 | Lrrfip1     |
| 3.06260182249073e-08 | -1.345814831       | 0.000422975937704194 | 1 | Aoc3        |
| 3.34685608300364e-08 | 0.501203492261856  | 0.000462234293623632 | 1 | Frzb        |
| 3.74723034985892e-08 | 0.475563609612666  | 0.000517529983619015 | 1 | Mgst1       |
| 3.78356306505497e-08 | 0.291788609988812  | 0.000522547894914741 | 1 | Cox6c       |
| 3.98916028492051e-08 | -0.308330095896448 | 0.000550942926950371 | 1 | NP-904338.1 |
| 4.10693193815717e-08 | -2.043985448       | 0.000567208369978886 | 1 | Edn1        |
| 4.37369689811867e-08 | -1.132712384       | 0.00060405127859917  | 1 | Lims2       |
| 4.4661093467013e-08  | -0.790149060360382 | 0.000616814361872917 | 1 | Pcdh7       |



|                      |                    |                      |   |          |
|----------------------|--------------------|----------------------|---|----------|
| 4.55148584778956e-08 | 0.688653815519475  | 0.000628605710438217 | 1 | St3gal4  |
| 4.95814099436005e-08 | 0.482240192487474  | 0.000684768852731066 | 1 | Igf1     |
| 5.57102085500469e-08 | 0.256826334998229  | 0.000769413690284697 | 1 | Lhfp     |
| 5.76356054684721e-08 | 0.524929525065863  | 0.000796005347125068 | 1 | Sdf2l1   |
| 5.96351998762334e-08 | -1.302121794       | 0.00082362174549066  | 1 | Nov      |
| 8.1168041588758e-08  | 0.831579778679405  | 0.00112101182238234  | 1 | Palm2    |
| 8.12343415015959e-08 | 0.418032440525568  | 0.00112192749047854  | 1 | Anxa1    |
| 8.52618960977541e-08 | -0.786619092117191 | 0.00117755204700608  | 1 | Actn1    |
| 9.42399951956568e-08 | 0.352839144497498  | 0.00130154857364722  | 1 | Cyb5     |
| 9.81217622694529e-08 | -1.305904799       | 0.00135515965870341  | 1 | Mrv1     |
| 1.00372010198952e-07 | 0.629446849        | 0.00138623783285772  | 1 | Psd3     |
| 1.21169636631766e-07 | 0.270991198840433  | 0.00167347385152132  | 1 | Dynll1   |
| 1.2612057880205e-07  | -0.482333317409096 | 0.00174185131383511  | 1 | Htra1    |
| 1.30563099918528e-07 | -1.130890526       | 0.00180320697297479  | 1 | Lmod1    |
| 1.36310815305829e-07 | 0.426058840819551  | 0.00188258867018881  | 1 | Arpc5    |
| 1.4954387347103e-07  | 1.161314551        | 0.00206535043650839  | 1 | Htra4    |
| 1.53754217556479e-07 | -1.749058478       | 0.00212349949867253  | 1 | Cd93     |
| 1.53918427552043e-07 | -0.428048123789636 | 0.00212576740292127  | 1 | Aebp1    |
| 1.57304759774105e-07 | -0.647768749190985 | 0.00217253603724016  | 1 | Ptprd    |
| 1.60209588739774e-07 | 0.255341947808917  | 0.00221265463008502  | 1 | Cd9      |
| 1.82051319296788e-07 | 0.751702214447683  | 0.00251431077080794  | 1 | Ssc5d    |
| 2.02706495593189e-07 | 0.969504519234766  | 0.00279957941063753  | 1 | Lhfp12   |
| 2.14665074328073e-07 | 0.444350312989799  | 0.00296473934154502  | 1 | Dkk3     |
| 2.19277441021748e-07 | 0.464799502788134  | 0.00302844073795136  | 1 | Pkd2     |
| 2.24602884098092e-07 | 0.380069923981516  | 0.00310199043227875  | 1 | Gem      |
| 2.40014574033711e-07 | -0.750558121355011 | 0.00331484128197958  | 1 | Zyx      |
| 2.60657688524796e-07 | 0.356803622318927  | 0.00359994333621596  | 1 | Bhlhe40  |
| 2.61888568178559e-07 | -1.447146998       | 0.00361694301511408  | 1 | Entpd1   |
| 2.81691906982684e-07 | 0.431762459470837  | 0.00389044692733785  | 1 | Gpx8     |
| 2.96885587654826e-07 | -0.892134543917474 | 0.00410028685110081  | 1 | Pdgfa    |
| 3.06487674341707e-07 | 0.348789475344705  | 0.00423290127033332  | 1 | Cd302    |
| 3.0852374464232e-07  | 0.509817377022542  | 0.00426102143725509  | 1 | Htra3    |
| 3.08962185211886e-07 | 0.299251809889992  | 0.00426707673996135  | 1 | Wwtr1    |
| 3.20618118590627e-07 | -1.131276882       | 0.00442805683585514  | 1 | Tmem47   |
| 3.29533449432478e-07 | -0.646834400104763 | 0.00455118647011195  | 1 | Prss23   |
| 3.76663938399703e-07 | -1.185960171       | 0.0052021056532383   | 1 | Synpo2   |
| 3.81703206761948e-07 | 0.366659724        | 0.00527170298858927  | 1 | Snx18    |
| 4.1966983147057e-07  | 0.305982263069763  | 0.00579606004244004  | 1 | Col6a1   |
| 4.20466445575801e-07 | 0.451765116        | 0.00580706207984739  | 1 | Emilin1  |
| 4.6623088214172e-07  | 0.300131335976279  | 0.00643911471325929  | 1 | Gm6251   |
| 4.71315655512546e-07 | -1.090959617       | 0.00650934051828378  | 1 | Bmp4     |
| 4.71437525711791e-07 | 0.733738897496706  | 0.00651102366760555  | 1 | Chic2    |
| 4.72014648866608e-07 | 0.361694312536747  | 0.00651899431549673  | 1 | Ndufa4l2 |
| 5.29238978428882e-07 | 0.683789282791045  | 0.00730931953108128  | 1 | Tmem45a  |
| 5.30734687745384e-07 | -1.868700286       | 0.0073299767724515   | 1 | Icam2    |
| 5.33638129877988e-07 | -1.045503792       | 0.00737007621174489  | 1 | Itih4    |
| 5.42064219698162e-07 | 0.514845492030922  | 0.00748644893825132  | 1 | Gnpnat1  |
| 5.59715095838611e-07 | -1.032326659       | 0.00773022518862706  | 1 | Rassf3   |
| 5.67661273817409e-07 | 0.721628693304318  | 0.00783996985269223  | 1 | Sdc3     |
| 5.76519396198884e-07 | -0.923869111664439 | 0.00796230938090279  | 1 | Crim1    |
| 5.85607356432789e-07 | 0.454882436048297  | 0.00808782319969324  | 1 | Abi3bp   |
| 5.92098548401932e-07 | 0.326176196583091  | 0.00817747305197908  | 1 | Sdc2     |
| 5.93826641050052e-07 | 0.352845135        | 0.00820133973954227  | 1 | Fuca1    |
| 6.82824820580911e-07 | 0.263434875936351  | 0.00943049359704297  | 1 | Ifitm3   |
| 6.86344464425051e-07 | -1.825833081       | 0.00947910339817438  | 1 | Nos3     |
| 6.97642756643511e-07 | 0.295281157250229  | 0.00963514411200352  | 1 | Tgfb2    |

|                      |                    |                    |   |             |
|----------------------|--------------------|--------------------|---|-------------|
| 7.46354431458193e-07 | 0.332184947401663  | 0.0103079010528691 | 1 | S100a10     |
| 7.54458270894053e-07 | 0.502649064118681  | 0.0104198231793178 | 1 | Ado         |
| 7.55607357242738e-07 | -0.453649575340755 | 0.0104356932108795 | 1 | Ogn         |
| 7.79049345319992e-07 | -0.535517623166213 | 0.0107594505082144 | 1 | Cyr61       |
| 8.05148238565677e-07 | 0.623700933775977  | 0.0111199023228306 | 1 | A4galt      |
| 8.25867956111266e-07 | -0.868772013109698 | 0.0114060623418527 | 1 | Vldlr       |
| 8.48436061808417e-07 | -1.770401673       | 0.011717750449636  | 1 | S1pr1       |
| 8.8214194821845e-07  | 0.732365911        | 0.012183262446845  | 1 | Tmem176a    |
| 8.91977345525993e-07 | 0.586072515        | 0.0123190991190595 | 1 | Snai1       |
| 8.97614519511367e-07 | 0.916477383194477  | 0.0123969541289715 | 1 | 2610002M06  |
| 9.36572211404941e-07 | -0.895368760697268 | 0.0129349988117136 | 1 | Lmcd1       |
| 9.79836457949743e-07 | 0.294230533552961  | 0.0135325213207439 | 1 | Crip1       |
| 1.23137066004181e-06 | 0.507464469796308  | 0.0170064601858375 | 1 | Gas1        |
| 1.23668782198446e-06 | 0.387038362877952  | 0.0170798955094274 | 1 | Atp5l       |
| 1.24116355482112e-06 | 0.356935258921329  | 0.0171417098556345 | 1 | Rpl35       |
| 1.27292392781192e-06 | 0.659737698334199  | 0.0175803523670104 | 1 | Gprc5b      |
| 1.2980741468432e-06  | 0.631396778        | 0.0179277020420515 | 1 | Rpl12       |
| 1.32389704913814e-06 | 1.080179485        | 0.0182843421456468 | 1 | Fam49a      |
| 1.35094681483421e-06 | -0.850889866058659 | 0.0186579264596753 | 1 | Nexn        |
| 1.35420560633619e-06 | -0.577672111       | 0.0187029336291091 | 1 | Ctsh        |
| 1.39109587191678e-06 | 0.283857668374566  | 0.0192124250870426 | 1 | C3          |
| 1.42982009340118e-06 | 0.411845449076284  | 0.0197472453099637 | 1 | Mtch1       |
| 1.484982897581E-06   | 0.696777868045495  | 0.0205090987984912 | 1 | Etv1        |
| 1.64589620508509e-06 | -1.23438157        | 0.0227314724884302 | 1 | Srgn        |
| 1.65813181312891e-06 | 0.269130351044087  | 0.0229004584711233 | 1 | Tram1       |
| 1.6716019692452e-06  | 0.754109113738201  | 0.0230864947972454 | 1 | Itih5       |
| 1.68703071809739e-06 | -0.947901106148435 | 0.023299581247643  | 1 | Ncam1       |
| 1.72341970759961e-06 | 0.323027885597142  | 0.0238021495816582 | 1 | Col5a2      |
| 1.74301616741847e-06 | 0.399510749306049  | 0.0240727962882165 | 1 | Gda         |
| 1.8607169297205e-06  | 0.443859861943978  | 0.0256983615163698 | 1 | Timp1       |
| 1.90378505313301e-06 | -0.714128200900522 | 0.026293175        | 1 | Cspg4       |
| 1.91122522328191e-06 | 0.678932507725484  | 0.0263959315587465 | 1 | Pdpn        |
| 1.9539397301244e-06  | -1.936768419       | 0.0269858616127481 | 1 | Cdh5        |
| 2.04657418262871e-06 | 0.379567939439995  | 0.0282652360362851 | 1 | Rhoq        |
| 2.11089456918853e-06 | 0.630743410557813  | 0.0291535648950628 | 1 | Sema6d      |
| 2.19615655973599e-06 | 0.762543504026824  | 0.0303311182465138 | 1 | Eps8        |
| 2.20423505925417e-06 | -1.007286428       | 0.0304426904033594 | 1 | Dsp         |
| 2.22160118561546e-06 | 0.338693857692104  | 0.0306825339745351 | 1 | Uba52       |
| 2.22694493911569e-06 | 0.402926439075125  | 0.0307563365541269 | 1 | 1810009A15F |
| 2.23573652961817e-06 | 0.406847685977456  | 0.0308777572105566 | 1 | Dbi         |
| 2.47281317890168e-06 | -0.493295404991391 | 0.0341520228138112 | 1 | Clu         |
| 2.62814149235781e-06 | 1.146402628        | 0.0362972621509537 | 1 | Gm17455     |
| 2.69258481630642e-06 | -1.09713221        | 0.037187288898008  | 1 | Sfrp2       |
| 2.83483330387277e-06 | 0.694666276        | 0.0391518827597868 | 1 | Anxa4       |
| 2.90577307581457e-06 | 0.257245422114905  | 0.0401316319500751 | 1 | Selk        |
| 3.03268426076189e-06 | 0.559148739102706  | 0.0418844023253825 | 1 | Tomm20      |
| 3.12400915767245e-06 | 0.432135240332834  | 0.0431456904766142 | 1 | Psmb3       |
| 3.14317257075471e-06 | -0.934145070980346 | 0.0434103563746933 | 1 | Tspan2      |
| 3.26097588791833e-06 | 0.376945331065558  | 0.0450373379880401 | 1 | Kdelr2      |
| 3.38372138285214e-06 | 0.407534676017085  | 0.0467325760185709 | 1 | Smtd1       |
| 3.39972764097976e-06 | 0.292750059495379  | 0.0469536384495715 | 1 | Tgif1       |
| 3.55635985798302e-06 | 0.729368354441976  | 0.0491168859986034 | 1 | Sept8       |
| 3.56477840290632e-06 | 0.306069772026935  | 0.0492331545225392 | 1 | Rap1a       |
| 3.91538287915315e-06 | 0.585432801462738  | 0.0540753529439841 | 1 | Ube2l6      |
| 3.91890350071881e-06 | -1.95699501        | 0.0541239762484275 | 1 | Bmx         |
| 3.92243623234661e-06 | 0.587761471        | 0.054172766804939  | 1 | Robo1       |

|                      |                    |                    |   |             |
|----------------------|--------------------|--------------------|---|-------------|
| 4.29626215548033e-06 | 0.32751349         | 0.0593356766293389 | 1 | Rhoj        |
| 4.52674824215581e-06 | 0.435806934523191  | 0.0625189199724139 | 1 | 4930503E24F |
| 4.54587935557506e-06 | -1.489321656       | 0.0627831397798472 | 1 | Rasl12      |
| 4.72964268293742e-06 | 0.502979264049876  | 0.0653210950940487 | 1 | Sox6        |
| 4.78546523375461e-06 | 0.737253150808073  | 0.066092060343385  | 1 | Supt4a      |
| 5.19462734645439e-06 | 0.254477748957486  | 0.0717429982818816 | 1 | Eno1b       |
| 5.37134768566264e-06 | -0.598414882854656 | 0.0741836828866867 | 1 | Fam71a      |
| 5.75342755493444e-06 | 0.271121362        | 0.0794605879611996 | 1 | Slc43a3     |
| 5.7727976359726e-06  | -0.663694677329065 | 0.0797281081504176 | 1 | Lpp         |
| 5.93592016021343e-06 | -1.540408636       | 0.0819809933327077 | 1 | Tes         |
| 5.93745773813979e-06 | -0.706392719485645 | 0.0820022288214486 | 1 | Cnn2        |
| 6.20136551274978e-06 | 0.651756325005342  | 0.0856470590965873 | 1 | Lsm2        |
| 6.30883753452909e-06 | 0.569679134        | 0.0871313551893813 | 1 | Rtn4r1      |
| 6.4492413048806e-06  | 0.457251215987698  | 0.0890704716617059 | 1 | Gm15421     |
| 6.5926036728381e-06  | -1.214504632       | 0.091050449325567  | 1 | Bcam        |
| 6.64177703040149e-06 | -1.614848605       | 0.0917295825668749 | 1 | Jph2        |
| 6.68098336736904e-06 | 0.783485455999572  | 0.0922710612867338 | 1 | Smim3       |
| 6.8940555427682e-06  | -1.2807546         | 0.0952138011011717 | 1 | Ptprb       |
| 6.94841299760031e-06 | 0.391454003837076  | 0.0959645319098579 | 1 | Atp6v1f     |
| 6.98103864496707e-06 | 0.294054163747639  | 0.0964151247256403 | 1 | Prelp       |
| 7.06305607943156e-06 | 0.611849834062892  | 0.0975478675130293 | 1 | Man2a2      |
| 7.43627399187242e-06 | 0.392574921518724  | 0.10270238         | 1 | Anxa7       |
| 7.49351610781656e-06 | -0.551731283330074 | 0.103492950965055  | 1 | Actn4       |
| 8.20038337631743e-06 | -1.489035425       | 0.113255495        | 1 | Thsd4       |
| 8.33467226986239e-06 | 0.482608854224309  | 0.115110159        | 1 | Pdgfrl      |
| 8.43184996690085e-06 | -1.132264025       | 0.116452279892868  | 1 | Hspb6       |
| 8.60211783277435e-06 | 0.554974883120421  | 0.118803849388447  | 1 | Rnft1       |
| 8.64870334386088e-06 | 0.771624414783907  | 0.119447241882063  | 1 | Gm3258      |
| 8.6545801062289e-06  | 0.316678802518852  | 0.119528405847127  | 1 | Psenen      |
| 8.71377156775348e-06 | 0.335238890476209  | 0.120345899122243  | 1 | Snrpg       |
| 8.78578081833555e-06 | 0.504184479723521  | 0.121340418882032  | 1 | Taf10       |
| 8.97015693980611e-06 | -1.908135089       | 0.123886837495662  | 1 | Stab1       |
| 9.2624663570809e-06  | 0.404947556436274  | 0.127923922857644  | 1 | Wls         |
| 9.46087901153578e-06 | 0.310124684203705  | 0.130664200028321  | 1 | Btf3        |
| 9.58742714240077e-06 | 0.339938062672424  | 0.132411956263697  | 1 | Snx7        |
| 9.65439343631338e-06 | 0.455540986132234  | 0.133336827748924  | 1 | Cmtm3       |
| 9.88881921500979e-06 | -0.476234495923497 | 0.136574482        | 1 | Ptfr        |
| 1.02768986547652e-05 | 0.353519371739923  | 0.141934247320962  | 1 | Aldoat1     |
| 1.03071933004702e-05 | -0.959081577481814 | 0.142352646672794  | 1 | Fbxo30      |
| 1.04514556971472e-05 | 0.39825438         | 0.144345054633299  | 1 | Pigs        |
| 1.04874415742921e-05 | -0.378618642343371 | 0.144842055582548  | 1 | Dst         |
| 1.0733025239064e-05  | -1.047683072       | 0.148233811576713  | 1 | Serpinb6b   |
| 1.081044458577E-05   | -0.375754381938386 | 0.149303050174069  | 1 | Pam         |
| 1.1068141323435e-05  | 0.678395105240006  | 0.152862099817961  | 1 | Tlr2        |
| 1.10728675917298e-05 | 0.678533991717895  | 0.152927374309381  | 1 | Steap3      |
| 1.14479182657294e-05 | -1.712004868       | 0.158107199167988  | 1 | Myct1       |
| 1.19294185504633e-05 | 0.513518092402434  | 0.164757199600448  | 1 | Ankrd50     |
| 1.21760117223369e-05 | 0.313418271159334  | 0.168162897897195  | 1 | Gm4788      |
| 1.22811137559352e-05 | 0.431679653        | 0.169614462        | 1 | Shisa4      |
| 1.23040254046252e-05 | 0.460827569265343  | 0.169930894863279  | 1 | Zfp385a     |
| 1.25264449421091e-05 | -0.781029766       | 0.173002731095468  | 1 | Ehd4        |
| 1.3265857644621e-05  | 0.381391939574791  | 0.18321476         | 1 | Immp1l      |
| 1.33225028274765e-05 | -0.788025818894713 | 0.183997086550277  | 1 | Wfdc1       |
| 1.39392656217711e-05 | 0.722369222300809  | 0.192515198        | 1 | Myo7a       |
| 1.43355335154017e-05 | 0.569710581774174  | 0.197988053381212  | 1 | Icosl       |
| 1.45295070172324e-05 | 0.612800246053617  | 0.200667021414997  | 1 | Layn        |

|                      |                    |                   |   |          |
|----------------------|--------------------|-------------------|---|----------|
| 1.46091192705779e-05 | 0.349367270917514  | 0.201766546245951 | 1 | Adam19   |
| 1.52302614052925e-05 | 0.281327825282474  | 0.210345140268495 | 1 | Rnase4   |
| 1.52382022189636e-05 | 0.556592546605767  | 0.210454810846106 | 1 | Sgce     |
| 1.5432871820361e-05  | -0.482560659220511 | 0.213143392711006 | 1 | Ltbp1    |
| 1.6125393472199e-05  | 0.88971216         | 0.222707809244541 | 1 | SrpX2    |
| 1.62070765216135e-05 | -1.546411797       | 0.223835933840005 | 1 | Tmem158  |
| 1.62782587872737e-05 | 0.339945740976072  | 0.224819032111037 | 1 | Fbln2    |
| 1.65464652123334e-05 | 0.432355078663424  | 0.228523231047536 | 1 | Hras     |
| 1.68111870021715e-05 | 0.289049572691435  | 0.232179303686991 | 1 | Fbn1     |
| 1.70443936985692e-05 | -0.838957674807809 | 0.235400121370939 | 1 | Tpm1     |
| 1.73521107317849e-05 | 0.293939654306032  | 0.239650001316682 | 1 | Tspo     |
| 1.73890458873147e-05 | 0.257850602304398  | 0.240160112749704 | 1 | Add3     |
| 1.73950933100805e-05 | -1.362283577       | 0.240243633705522 | 1 | Sgcg     |
| 1.75109631620113e-05 | -0.819077726785218 | 0.241843912230538 | 1 | Slmap    |
| 1.77989700258511e-05 | -0.777854192798107 | 0.245821575027029 | 1 | MsrB3    |
| 1.81740479739756e-05 | 0.571318564408693  | 0.251001776568577 | 1 | Pdpf     |
| 1.86621034461295e-05 | 0.623773637688135  | 0.257742310694494 | 1 | Apobec1  |
| 1.88668828419333e-05 | -1.210095349       | 0.260570518929941 | 1 | Ldb3     |
| 1.89020804577553e-05 | -0.577689812571316 | 0.261056633202058 | 1 | Zbed6    |
| 1.90192339265378e-05 | 0.393635099720693  | 0.262674639759414 | 1 | Dact3    |
| 2.06066959865677e-05 | -0.644354176348765 | 0.284599078270487 | 1 | St5      |
| 2.10779794352229e-05 | 0.627887397869369  | 0.291107973979864 | 1 | Lgi4     |
| 2.15802006215462e-05 | -0.571248450160253 | 0.298044150784175 | 1 | Cytl1    |
| 2.21153908100482e-05 | 0.406810668790146  | 0.305435662477576 | 1 | Ccl19    |
| 2.30710125664287e-05 | 0.261859989374748  | 0.318633754554947 | 1 | Rpl10    |
| 2.3483301001853e-05  | -0.67384273        | 0.324327870136592 | 1 | Kctd10   |
| 2.41671617798518e-05 | 0.541561404        | 0.333772671341533 | 1 | Phf11d   |
| 2.4205336784506e-05  | 0.556136701922385  | 0.334299906330813 | 1 | Pole4    |
| 2.58483373602169e-05 | 0.377914106819905  | 0.356991387281956 | 1 | Igf2r    |
| 2.5965789588196e-05  | 0.484701779        | 0.358613520002576 | 1 | Dnm1     |
| 2.63162790515652e-05 | 0.461150035932288  | 0.363454129981167 | 1 | Ddn1     |
| 2.65602626764687e-05 | 0.332124164        | 0.366823787824709 | 1 | Mfap5    |
| 2.72383355178412e-05 | 0.311525368195934  | 0.376188651836905 | 1 | Romo1    |
| 2.73383805624844e-05 | 0.483831361914581  | 0.377570373948472 | 1 | Atp6v0a2 |
| 2.73842084921149e-05 | -0.601400805485412 | 0.378203303484599 | 1 | Lox      |
| 2.79213636983885e-05 | 0.366939273293917  | 0.385621954038443 | 1 | Psmb2    |
| 2.85284181873217e-05 | 0.375053932750431  | 0.394005983585099 | 1 | Sec61b   |
| 2.98214160632836e-05 | 0.602158084387694  | 0.411863577250009 | 1 | Aldh1a1  |
| 3.06094581626783e-05 | -1.226630777       | 0.422747227       | 1 | Kcnmb1   |
| 3.1579186164743e-05  | 0.748481757648938  | 0.436140140121266 | 1 | Cdh11    |
| 3.17625064852929e-05 | 0.629440829145873  | 0.438671977068381 | 1 | Serf1    |
| 3.28104697236789e-05 | -1.260326389       | 0.453145397       | 1 | Myocd    |
| 3.40047623518832e-05 | 0.505046155694668  | 0.469639772841859 | 1 | Gpsm1    |
| 3.43328310037775e-05 | 0.250879946196457  | 0.474170728993171 | 1 | Rpl37a   |
| 3.44481567901911e-05 | 0.420942666762201  | 0.475763493429329 | 1 | Rpl22l1  |
| 3.46335841641578e-05 | 0.460561467849972  | 0.478324430891184 | 1 | Smyd2    |
| 3.56675541208186e-05 | 0.631219580384516  | 0.492604589962626 | 1 | Cisd2    |
| 3.60570417286563e-05 | 0.285755180384911  | 0.497983803314472 | 1 | Npc2     |
| 3.64550075825422e-05 | 0.431495143186279  | 0.503480109722491 | 1 | Ube2q2   |
| 3.76475949294229e-05 | 0.271323650873441  | 0.519950934       | 1 | Rps16    |
| 3.79440222424025e-05 | 0.618731742096984  | 0.524044891189822 | 1 | Ahi1     |
| 3.84844881543814e-05 | -0.808326982073288 | 0.531509265900162 | 1 | Epas1    |
| 3.87525989063923e-05 | -1.408997754       | 0.535212143496184 | 1 | Gpr116   |
| 3.99841414953493e-05 | -0.622450051959869 | 0.552220978192269 | 1 | Cyp1b1   |
| 4.0571690159566e-05  | -1.11709955        | 0.560335612793766 | 1 | Ephx2    |
| 4.07448651436164e-05 | -0.624127841010213 | 0.562727332498486 | 1 | Pdlim3   |



|                      |                    |                   |   |             |
|----------------------|--------------------|-------------------|---|-------------|
| 4.09790043012088e-05 | 0.269272336524443  | 0.565961028403995 | 1 | Golga7      |
| 4.12037642783611e-05 | 0.463130243942772  | 0.569065188448446 | 1 | Il1r1       |
| 4.15029697262794e-05 | 0.317735977074449  | 0.573197514889645 | 1 | Numb1       |
| 4.15991458799016e-05 | -0.613715861816621 | 0.574525803747321 | 1 | Wwp2        |
| 4.2101843379641e-05  | 0.405533560067139  | 0.581468558916221 | 1 | Ugdh        |
| 4.22021509283964e-05 | -0.972965252845622 | 0.582853906472083 | 1 | Pde5a       |
| 4.23757375708577e-05 | 0.579348136391999  | 0.585251311591115 | 1 | Ptgm        |
| 4.24458357068277e-05 | -1.845943125       | 0.586219436946997 | 1 | Mylk4       |
| 4.31726721100608e-05 | 0.846149366451558  | 0.596257775       | 1 | BC017643    |
| 4.32965620493522e-05 | -1.079599003       | 0.597968818463603 | 1 | Hey2        |
| 4.4338221977433e-05  | 0.291160992885666  | 0.612355183730327 | 1 | Pabpc4      |
| 4.4653804198192e-05  | 0.622155036465623  | 0.616713689781229 | 1 | C1qtnf7     |
| 4.51379013858147e-05 | 0.492509560266242  | 0.623399556039487 | 1 | Yif1a       |
| 4.77175339339648e-05 | -1.488247275       | 0.659026861161988 | 1 | Fmo3        |
| 4.84294130637825e-05 | 0.394841241301829  | 0.668858624       | 1 | Mrps33      |
| 4.8991477234109e-05  | 0.531572819        | 0.676621292       | 1 | Sdccag3     |
| 4.9479767106803e-05  | 0.439375058639921  | 0.683365063512056 | 1 | Prelid1     |
| 4.96793355658521e-05 | 0.262492719748619  | 0.686121303499983 | 1 | Col15a1     |
| 4.9708770835964e-05  | -1.81365328        | 0.686527834015499 | 1 | Cd24a       |
| 5.03588149390549e-05 | 0.463780649718383  | 0.695505593123288 | 1 | Tmem41b     |
| 5.07761205358229e-05 | 0.473763965957269  | 0.701269001       | 1 | Atxn10      |
| 5.25245229492398e-05 | 0.329344949936333  | 0.725416186451951 | 1 | Pomp        |
| 5.30658873091739e-05 | 0.261404082832117  | 0.732892969627001 | 1 | Il33        |
| 5.35806674529717e-05 | 0.304604765        | 0.740002598192993 | 1 | Rpsa        |
| 5.44368339770286e-05 | 0.452099024148666  | 0.751827114056742 | 1 | Alyref      |
| 5.47199809629924e-05 | -0.624048596       | 0.755737657079889 | 1 | Ttc28       |
| 5.47864454173947e-05 | -1.310614226       | 0.756655597659639 | 1 | Mtus2       |
| 5.91890155158356e-05 | -1.591573392       | 0.817459493289206 | 1 | E030013119R |
| 6.02734502702134e-05 | -0.386380818628917 | 0.832436621681918 | 1 | Amotl2      |
| 6.189932016979E-05   | -1.097370121       | 0.854891510864969 | 1 | Sema3f      |
| 6.28479014260113e-05 | 0.279489530690233  | 0.867992366594642 | 1 | Fau         |
| 6.28971215323072e-05 | -0.775484635506359 | 0.868672145482695 | 1 | Nuak1       |
| 6.32968553546204e-05 | 0.503969878621436  | 0.874192869302662 | 1 | Pmm1        |
| 6.41142501552328e-05 | 0.279393575787583  | 0.885481909       | 1 | Prdx2       |
| 6.43799098139753e-05 | 0.418203038282342  | 0.889150934440812 | 1 | Anpep       |
| 6.47913779193497e-05 | 0.390521580157312  | 0.894833720444139 | 1 | Ccdc53      |
| 6.61051207969764e-05 | 0.325477285662548  | 0.912977823327041 | 1 | Herpud1     |
| 6.72300205368835e-05 | 0.384729548883191  | 0.928513813634899 | 1 | Fbxw8       |
| 6.73002815198953e-05 | 0.684973059196621  | 0.929484188071275 | 1 | Col12a1     |
| 6.73978650818257e-05 | 0.261184388132392  | 0.930831914645095 | 1 | Col6a2      |
| 6.78546367323066e-05 | 0.437722003        | 0.937140387909886 | 1 | Manf        |
| 7.04626955863841e-05 | 0.525482238668456  | 0.973160288743551 | 1 | Ints4       |
| 7.1839548775351e-05  | 0.408841238        | 0.992176008136373 | 1 | Sh3d19      |
| 7.20194331758604e-05 | 0.728486660088531  | 0.994660391591808 | 1 | Tril        |
| 7.27589765504738e-05 | 0.784175481912452  | 1                 | 1 | Crlf1       |
| 7.34148697076709e-05 | 0.343593267205296  | 1                 | 1 | Hand2       |
| 7.48555124364193e-05 | 0.285210956486132  | 1                 | 1 | C4b         |
| 7.68158556391998e-05 | 0.460249969        | 1                 | 1 | Vdac3       |
| 7.88268045816485e-05 | 0.472954592936313  | 1                 | 1 | Aspn        |
| 7.8972535950664e-05  | 0.407639487670495  | 1                 | 1 | Ptplb       |
| 8.02044643604759e-05 | 0.393131857670007  | 1                 | 1 | Trps1       |
| 8.13397691830214e-05 | 0.633724830428073  | 1                 | 1 | Tenm3       |
| 8.19054789959736e-05 | -0.289138874       | 1                 | 1 | Actb        |
| 8.24973153247225e-05 | 0.531249251066704  | 1                 | 1 | Commdd6     |
| 8.25009120918416e-05 | 0.397536257156697  | 1                 | 1 | Arntl       |
| 8.25508122681349e-05 | 0.281222595225364  | 1                 | 1 | Snrpd2      |

|                      |                    |   |   |          |
|----------------------|--------------------|---|---|----------|
| 8.47907840518215e-05 | 0.417507288378516  | 1 | 1 | Sra1     |
| 8.70135703715974e-05 | 0.407634007722993  | 1 | 1 | Usp22    |
| 8.70666624341197e-05 | 0.326999631390785  | 1 | 1 | Lipa     |
| 8.76445781805579e-05 | 0.555079582371917  | 1 | 1 | Papss2   |
| 9.11095274361052e-05 | 0.649778861952155  | 1 | 1 | Apbb1ip  |
| 9.20813251398107e-05 | 0.323915956        | 1 | 1 | Nsa2     |
| 9.2273679448351e-05  | -0.685449765461661 | 1 | 1 | Cav2     |
| 9.26102462997324e-05 | 0.388831809328163  | 1 | 1 | Uqcc2    |
| 9.66787696809851e-05 | -1.263381262       | 1 | 1 | Npy1r    |
| 0.000100094122746365 | 0.792951218447294  | 1 | 1 | Cbr3     |
| 0.000101516476902479 | 0.278142574342728  | 1 | 1 | Rps15a   |
| 0.000101607368165138 | -0.688873654173171 | 1 | 1 | Adcy5    |
| 0.000101612258082556 | -0.505423290723608 | 1 | 1 | Mical2   |
| 0.000102671827931422 | 0.631144584989506  | 1 | 1 | Gpr153   |
| 0.000104331878812366 | -1.423376292       | 1 | 1 | Podxl    |
| 0.000104673019212935 | 0.751934189        | 1 | 1 | Kctd15   |
| 0.000106596111381375 | 0.377939430499225  | 1 | 1 | Srprb    |
| 0.000112454976567899 | -0.847615373020041 | 1 | 1 | Neat1    |
| 0.000112546213305647 | 0.353775607        | 1 | 1 | Medag    |
| 0.000117879198008548 | 0.366275503084359  | 1 | 1 | Atp6v1g1 |
| 0.000120593125021391 | 0.630556898564674  | 1 | 1 | Gfra1    |
| 0.000120700444461358 | 0.284070857104795  | 1 | 1 | Fkbp7    |
| 0.000122492576388878 | 0.414486786341477  | 1 | 1 | Bcap31   |
| 0.000122944155568708 | 0.324466148867617  | 1 | 1 | Hypk     |
| 0.000123523657376224 | -0.563480679945735 | 1 | 1 | Vcl      |
| 0.000125316631132277 | 0.334802794154311  | 1 | 1 | Tmem176b |
| 0.000125404612328321 | 0.506333322817935  | 1 | 1 | Hr       |
| 0.000125453430763785 | -0.864338932       | 1 | 1 | Enah     |
| 0.000126048657558646 | 0.465424359612115  | 1 | 1 | Cdk4     |
| 0.00012780224061792  | -0.514320480925009 | 1 | 1 | Arhgap29 |
| 0.000129131784390342 | -0.474472786876211 | 1 | 1 | Cd200    |
| 0.000130865680735008 | 0.540096685286345  | 1 | 1 | Cand1    |
| 0.000134609749439527 | -1.177866263       | 1 | 1 | Mmp17    |
| 0.000135790183597581 | 0.318531965769327  | 1 | 1 | G0s2     |
| 0.000136955838438665 | 0.390317854651677  | 1 | 1 | Lpar1    |
| 0.000138126573768633 | 0.323095127281817  | 1 | 1 | Socs2    |
| 0.000138151849959128 | 0.474993190120933  | 1 | 1 | Stx18    |
| 0.000142978505988106 | 0.658239220452134  | 1 | 1 | Spry4    |
| 0.000144141213661291 | 0.415071787523206  | 1 | 1 | Ppp2r3a  |
| 0.000146606106728443 | 0.352324668562067  | 1 | 1 | Oaf      |
| 0.000147448257192066 | 0.271117034953554  | 1 | 1 | Rbm8a    |
| 0.000149178309394347 | -0.716880228600409 | 1 | 1 | Rbpms    |
| 0.000149906053209545 | -0.650349280435462 | 1 | 1 | Chd3     |
| 0.00015274507871868  | 0.502807257550029  | 1 | 1 | Sdhd     |
| 0.00015606817166896  | 0.489931227229799  | 1 | 1 | Cd55     |
| 0.000156374213762076 | -0.585581679       | 1 | 1 | Pygm     |
| 0.000158501131500057 | 0.371963524        | 1 | 1 | Gtf2h5   |
| 0.00016012336237888  | -0.643349517568603 | 1 | 1 | Slit3    |
| 0.00016093486607931  | 0.498037565649731  | 1 | 1 | C1d      |
| 0.000167362647970288 | 0.446761298480188  | 1 | 1 | Pqlc3    |
| 0.000171142507988194 | -0.983984825210536 | 1 | 1 | Phtf2    |
| 0.000173707575592306 | -1.509426433       | 1 | 1 | Tie1     |
| 0.000173866516615352 | 0.502445988764645  | 1 | 1 | Slc44a1  |
| 0.000174157358990055 | -1.230566949       | 1 | 1 | Speg     |
| 0.00017566047960629  | 0.268942993094394  | 1 | 1 | Hint1    |
| 0.000179004817545052 | 0.279846849        | 1 | 1 | Pdgfra   |

|                      |                    |   |   |             |
|----------------------|--------------------|---|---|-------------|
| 0.000179112737923903 | 0.459763486634967  | 1 | 1 | Kbtbd2      |
| 0.000179204785202004 | 0.358892543037378  | 1 | 1 | Fam102b     |
| 0.000179418938972929 | -1.117444014       | 1 | 1 | Lmo2        |
| 0.000181782117370273 | 0.343220619539348  | 1 | 1 | Ak1         |
| 0.0001826362679409   | 0.531888438210162  | 1 | 1 | B4galt5     |
| 0.000187309247696611 | 0.370397409527274  | 1 | 1 | Tgfb3       |
| 0.000187606006976641 | 0.303190345922293  | 1 | 1 | Sri         |
| 0.000188878591776483 | -0.487927921422021 | 1 | 1 | Fbln5       |
| 0.000202952018319819 | 0.326932385937724  | 1 | 1 | Il13ra1     |
| 0.000203395115340374 | -0.498253493539112 | 1 | 1 | Mfge8       |
| 0.000209580617668512 | 0.288083952992388  | 1 | 1 | Cct5        |
| 0.000210056446967433 | -0.666778303120927 | 1 | 1 | Npr1        |
| 0.00021078001738307  | 0.504589996829436  | 1 | 1 | Chkb        |
| 0.000214120732311708 | 0.709052785392245  | 1 | 1 | Twist2      |
| 0.00021790225472141  | 0.268058736224117  | 1 | 1 | Cstb        |
| 0.000218416253923125 | 0.284020965157807  | 1 | 1 | Prnp        |
| 0.000221013965510968 | -0.478775952823808 | 1 | 1 | Setd5       |
| 0.000221503767688046 | 0.461546807545163  | 1 | 1 | Gm3219      |
| 0.000222340744324917 | -1.51058377        | 1 | 1 | 5930403L14F |
| 0.000224767966136598 | 0.494461951796496  | 1 | 1 | Enpp1       |
| 0.000227211163529421 | 0.302733241050323  | 1 | 1 | Akt2        |
| 0.000228060613544131 | -0.518177729598584 | 1 | 1 | Oxct1       |
| 0.000233867742906386 | -0.403459058246483 | 1 | 1 | Sema3d      |
| 0.000233963841101758 | 0.435203009250998  | 1 | 1 | Carhsp1     |
| 0.000235275229529408 | 0.332938664039902  | 1 | 1 | Nhp2l1      |
| 0.000236109945164259 | 0.478424302245621  | 1 | 1 | Col16a1     |
| 0.000245270815826742 | -0.546752804017434 | 1 | 1 | Tm4sf1      |
| 0.000247460668089886 | 0.768838054        | 1 | 1 | Tmem184c    |
| 0.000255598721109224 | 0.727691520464578  | 1 | 1 | Ccdc157     |
| 0.000259463891893164 | 0.492001068133023  | 1 | 1 | Fndc1       |
| 0.000259584595420068 | 0.428474300560808  | 1 | 1 | Mif         |
| 0.000264689799914428 | 0.282006690131791  | 1 | 1 | Dnajc19     |
| 0.000267717481179868 | 0.461865117881702  | 1 | 1 | Palm        |
| 0.000270075198125297 | -0.643584486593203 | 1 | 1 | Pdlim4      |
| 0.000272090397646686 | 0.446367930201424  | 1 | 1 | Gpx7        |
| 0.000274911168538653 | -0.306708334316326 | 1 | 1 | Col4a1      |
| 0.000282716119770494 | -0.567015106985949 | 1 | 1 | Igf1r       |
| 0.000287268740011112 | -0.687510109103574 | 1 | 1 | Pltp        |
| 0.000287303765411732 | -1.177778684       | 1 | 1 | Cbfa2t3     |
| 0.000288948577849182 | 0.260617368666185  | 1 | 1 | Ier3ip1     |
| 0.000290197811596561 | 0.543781870712298  | 1 | 1 | B3gnt9      |
| 0.000306490492022606 | 0.279516775915072  | 1 | 1 | Entpd2      |
| 0.000307625038776674 | -0.381745979801725 | 1 | 1 | Adamts1     |
| 0.000311902761319176 | 0.373775894880934  | 1 | 1 | Rnf2        |
| 0.000313901219596241 | 0.541488746551231  | 1 | 1 | 1700025G04  |
| 0.000313957536396315 | 0.412720158317947  | 1 | 1 | Mbd6        |
| 0.000313984953463154 | 0.387123509198357  | 1 | 1 | Bmper       |
| 0.000316544852541691 | -0.874422131641052 | 1 | 1 | Itga1       |
| 0.000320130600984647 | 0.410769009963198  | 1 | 1 | Ugp2        |
| 0.000320507404532941 | 0.286854131580466  | 1 | 1 | Ly6a        |
| 0.000321739602405386 | 0.289769412348167  | 1 | 1 | Abhd14a     |
| 0.000322118791657597 | 0.575989388138875  | 1 | 1 | Tmem50b     |
| 0.000325412757972703 | 0.502084437839382  | 1 | 1 | Bccip       |
| 0.000326159015121809 | 0.393383848435108  | 1 | 1 | Actr2       |
| 0.000328682951895579 | 0.310893464106213  | 1 | 1 | Hiat1       |
| 0.00032932050932578  | 0.472298588783686  | 1 | 1 | Fam26e      |

|                      |                    |   |   |             |
|----------------------|--------------------|---|---|-------------|
| 0.000329378627390987 | 0.598335785394084  | 1 | 1 | Fam63a      |
| 0.000331976639939407 | 0.322940318414667  | 1 | 1 | Dnajc3      |
| 0.000332088120651997 | 0.256252843081652  | 1 | 1 | Crispld2    |
| 0.000335421052255382 | 0.268963174278051  | 1 | 1 | Atp6v0d1    |
| 0.000338824546974107 | -1.18358446        | 1 | 1 | Perp        |
| 0.000339797583374352 | 0.256021531727864  | 1 | 1 | Vimp        |
| 0.000349647516586729 | -1.316827294       | 1 | 1 | Fnbp1l      |
| 0.000352307424071369 | 0.350148311480338  | 1 | 1 | Banf1       |
| 0.000353228043840279 | 0.327592157370268  | 1 | 1 | Lgals3bp    |
| 0.00035585490619733  | 0.501349022155053  | 1 | 1 | Clmp        |
| 0.00036141066279743  | 0.835030607837138  | 1 | 1 | Col5a3      |
| 0.000374931548340755 | 0.312510035977047  | 1 | 1 | Comt        |
| 0.000380406512769674 | 0.485544331612928  | 1 | 1 | Spin1       |
| 0.00038098418964213  | 0.275461644053622  | 1 | 1 | Ngf         |
| 0.000381145689932455 | 0.665773586380444  | 1 | 1 | Tmem100     |
| 0.000382992098826052 | 0.412270270934486  | 1 | 1 | Tmem29      |
| 0.000389047092845211 | 0.295932814355659  | 1 | 1 | Ociad1      |
| 0.000397190860233951 | 0.666236665639784  | 1 | 1 | Dpm2        |
| 0.000398131651404889 | 0.526787726004924  | 1 | 1 | Angptl1     |
| 0.00040609451481304  | 0.416894002214559  | 1 | 1 | 2410006H16f |
| 0.000410758346299001 | 0.577524019026443  | 1 | 1 | Tmem9b      |
| 0.000411088196239505 | 0.346471015        | 1 | 1 | Mme         |
| 0.000411371294310806 | 0.362960197120807  | 1 | 1 | H2afv       |
| 0.000419389403963412 | 0.634141771804339  | 1 | 1 | Arsb        |
| 0.000421344831438009 | 0.290441577241474  | 1 | 1 | Cd44        |
| 0.000423252543166233 | 0.458848050429832  | 1 | 1 | Gstm5       |
| 0.000425551653695597 | 0.789615686800288  | 1 | 1 | Angpt1      |
| 0.000434175947362139 | -0.648383981052318 | 1 | 1 | Rrad        |
| 0.000450070107867683 | 0.301859239490591  | 1 | 1 | Hnmpa1      |
| 0.000451649323147008 | 0.594761069919223  | 1 | 1 | Rcor3       |
| 0.000453664184963406 | 0.525933608326992  | 1 | 1 | Sdc1        |
| 0.000462400165652597 | 0.262076158129844  | 1 | 1 | S1pr2       |
| 0.000469222001173613 | 0.448160878834612  | 1 | 1 | Twf1        |
| 0.000477208911727991 | 0.421906457959219  | 1 | 1 | Cdk8        |
| 0.000481409546232593 | 0.629346394608914  | 1 | 1 | Sgpp1       |
| 0.000481774929392997 | 0.285918944860514  | 1 | 1 | Clptm1l     |
| 0.000488585716932413 | -0.946359027710102 | 1 | 1 | Rnf144a     |
| 0.00050385249391613  | -1.13279446        | 1 | 1 | Procr       |
| 0.00051211378565081  | -1.25044528        | 1 | 1 | Itgb3       |
| 0.000522468909546703 | 0.389727904956203  | 1 | 1 | Dap         |
| 0.000525643479200026 | 0.693866080468694  | 1 | 1 | Piezo1      |
| 0.000525708531783986 | -0.738049668054316 | 1 | 1 | Ntf3        |
| 0.000528466154072356 | -0.634886330307319 | 1 | 1 | Uaca        |
| 0.000559965219839247 | -0.535478366497077 | 1 | 1 | Foxp1       |
| 0.000561209282670686 | 0.378870962937337  | 1 | 1 | Pgk1        |
| 0.000593749657015367 | -1.333471229       | 1 | 1 | Rasip1      |
| 0.000605034711419257 | 0.384364951814173  | 1 | 1 | Capg        |
| 0.000621602578391993 | 0.809359260722043  | 1 | 1 | Cx3cl1      |
| 0.000624996250623598 | 0.508548786        | 1 | 1 | Cdk9        |
| 0.000637747651831135 | 0.497044253644624  | 1 | 1 | Per2        |
| 0.000642802984555127 | -0.422943863332488 | 1 | 1 | Gadd45g     |
| 0.000647449910837362 | 0.459467949749303  | 1 | 1 | Enpp2       |
| 0.000647555967256231 | 0.285069156958408  | 1 | 1 | Fxyd5       |
| 0.000652534885076033 | 0.625453087223564  | 1 | 1 | Commdd9     |
| 0.000666030151885    | 0.420009113008756  | 1 | 1 | Tmx2        |
| 0.000672082783082451 | -0.579968459390587 | 1 | 1 | Ppp1r12c    |

|                      |                    |   |   |            |
|----------------------|--------------------|---|---|------------|
| 0.000675459296382359 | 0.836950703        | 1 | 1 | Cinp       |
| 0.000688411301895736 | 0.676639677637476  | 1 | 1 | 2610034B18 |
| 0.000696670621511235 | 0.349795506        | 1 | 1 | Ufm1       |
| 0.000699665201688714 | -0.754044585360973 | 1 | 1 | Cdc42ep3   |
| 0.000702137433287239 | 0.419354321058768  | 1 | 1 | Tm9sf1     |
| 0.00070660265844927  | 0.401287040932744  | 1 | 1 | Cmpk1      |
| 0.000723085737672368 | 0.272923413706493  | 1 | 1 | Farp1      |
| 0.000725408688714816 | 0.441010173429107  | 1 | 1 | Tbrg1      |
| 0.000735527291867129 | -0.932727161616705 | 1 | 1 | Csrp1      |
| 0.000751945584169795 | 0.511028008796417  | 1 | 1 | Med8       |
| 0.000754165727569872 | -0.689043240656037 | 1 | 1 | Ehbp1l1    |
| 0.000764698305023565 | 0.414971494608816  | 1 | 1 | Ivns1abp   |
| 0.000775972825343216 | 0.285579762215769  | 1 | 1 | Ctsk       |
| 0.00078443279220039  | 0.626508672198938  | 1 | 1 | Micu1      |
| 0.000794088130101683 | 0.535620251053118  | 1 | 1 | Cnpy4      |
| 0.000796649527855089 | 0.430261725677053  | 1 | 1 | Snx2       |
| 0.000821003249205439 | 0.264805212361281  | 1 | 1 | Morf4l2    |
| 0.000837493646273459 | 0.431135572279604  | 1 | 1 | Nop16      |
| 0.000862598179364022 | -1.042119114       | 1 | 1 | Tek        |
| 0.000863584759446651 | 0.540198233902833  | 1 | 1 | Adamtsl4   |
| 0.000863607089891667 | -0.252624449179938 | 1 | 1 | Ubc        |
| 0.000865993676444816 | 0.611447858884507  | 1 | 1 | Ahsg       |
| 0.000873075347091    | 0.306340811464832  | 1 | 1 | Smc2       |
| 0.000873835315144943 | -0.621123221007448 | 1 | 1 | Lifr       |
| 0.000886097629918346 | -0.461371329074757 | 1 | 1 | Zc2hc1a    |
| 0.000890175718504862 | -0.461098758503641 | 1 | 1 | Lrrc32     |
| 0.000890744918607489 | -1.57793261        | 1 | 1 | Ptprz1     |
| 0.000902013155504853 | 0.322167559911745  | 1 | 1 | Fzd1       |
| 0.000936668491238684 | 0.422112163205534  | 1 | 1 | Mark2      |
| 0.000952972311289515 | 0.311535960160462  | 1 | 1 | Mxra7      |
| 0.000969155274476418 | 0.497178435181445  | 1 | 1 | Apoa1bp    |
| 0.000982279187639832 | 0.448395730878904  | 1 | 1 | Tmem55a    |
| 0.00101491247617401  | -0.411633907295307 | 1 | 1 | Gstm2      |
| 0.00103345795869672  | 0.468480881325569  | 1 | 1 | Sidt2      |
| 0.00106085813737505  | 0.561046438        | 1 | 1 | Cmklr1     |
| 0.00106229567089577  | 0.433976476045713  | 1 | 1 | Lsp1       |
| 0.00106406862041219  | -0.987168158820475 | 1 | 1 | F3         |
| 0.00108288927371293  | -1.090496852       | 1 | 1 | Omd        |
| 0.00108631787809799  | -0.497961509265112 | 1 | 1 | Hip1       |
| 0.00109594168216544  | -0.848119068326518 | 1 | 1 | Gdf10      |
| 0.00110433760567857  | 0.394290246742735  | 1 | 1 | Kremen1    |
| 0.00110892768693192  | 0.752303153094192  | 1 | 1 | Itm2a      |
| 0.00112087553329492  | 0.674267460071809  | 1 | 1 | Olfml1     |
| 0.00113084023626943  | -0.471868096196629 | 1 | 1 | Ddb1       |
| 0.00113127305820658  | -1.514480161       | 1 | 1 | Fbxo32     |
| 0.0011335325278609   | -0.961376789814199 | 1 | 1 | Efnb2      |
| 0.00114361199342647  | 0.770714394950035  | 1 | 1 | Nol3       |
| 0.00119276805019809  | 0.337878285971357  | 1 | 1 | Mgat2      |
| 0.00122264272348106  | 0.376319229        | 1 | 1 | Tmem237    |
| 0.00123569860994066  | -0.951059581126566 | 1 | 1 | Ttll7      |
| 0.00126344955732024  | 0.626812706739604  | 1 | 1 | Lbp        |
| 0.00126893952136334  | 0.252787483183399  | 1 | 1 | Lrif1      |
| 0.00127985173705255  | 0.378447737628658  | 1 | 1 | Cdv3       |
| 0.001289974258809    | 0.533542927561552  | 1 | 1 | Otud7b     |
| 0.00129056001035451  | -0.572343320714961 | 1 | 1 | Map1a      |
| 0.00129677588334903  | 0.493581659514546  | 1 | 1 | Evc2       |



|                     |                    |   |   |             |
|---------------------|--------------------|---|---|-------------|
| 0.00130351168255118 | 0.604149620739175  | 1 | 1 | D19Bwg1357  |
| 0.00132302949595284 | -1.002785584       | 1 | 1 | Clec14a     |
| 0.00132733928251525 | -0.359517110195934 | 1 | 1 | Abcc9       |
| 0.00132993514263359 | 0.594861106933001  | 1 | 1 | Tns3        |
| 0.00133254014173669 | 0.497257462        | 1 | 1 | Slc16a1     |
| 0.00135929173861061 | 0.527767490186251  | 1 | 1 | Kdelc1      |
| 0.00138407277914518 | -0.628940368982929 | 1 | 1 | Tacc2       |
| 0.00139074336571324 | -0.433895225404325 | 1 | 1 | Secisbp2l   |
| 0.00139132129056275 | -0.412048565377495 | 1 | 1 | Cux1        |
| 0.00140496735270471 | -0.779893763855414 | 1 | 1 | Mustn1      |
| 0.00143752213389219 | 0.277531305797228  | 1 | 1 | Cyba        |
| 0.00145356548687394 | 0.48717256         | 1 | 1 | Praf2       |
| 0.0014546456634665  | -0.545957311514754 | 1 | 1 | Dusp3       |
| 0.0014563740191278  | 0.260471514232965  | 1 | 1 | Atp6v0e     |
| 0.00145984419002316 | -1.050728793       | 1 | 1 | Ppp1r14a    |
| 0.00146486716059618 | -1.30461011        | 1 | 1 | Net1        |
| 0.00146701928409391 | -0.769039672186392 | 1 | 1 | Atp1b2      |
| 0.00147335246057844 | 0.492911833231513  | 1 | 1 | Dnajb11     |
| 0.00148100055256058 | 0.591761813019339  | 1 | 1 | 1810030O07  |
| 0.00148589929415113 | 0.334424743        | 1 | 1 | Ddx19a      |
| 0.00148674848052374 | -0.535067259975605 | 1 | 1 | Pdlim7      |
| 0.00149393810695244 | -0.408617747140636 | 1 | 1 | Arid5b      |
| 0.00149498321011633 | -1.910765301       | 1 | 1 | Rgs7bp      |
| 0.00151451673692656 | 0.457079642293594  | 1 | 1 | Lamtor1     |
| 0.00152645404335285 | 0.301848687394364  | 1 | 1 | Acap2       |
| 0.00157904381650473 | 0.272965891694504  | 1 | 1 | Txndc12     |
| 0.00158187974542361 | 0.730638302679346  | 1 | 1 | Coq10a      |
| 0.0015841595498827  | 0.252181854127684  | 1 | 1 | Nav1        |
| 0.00159192912463676 | -0.702494723006676 | 1 | 1 | Ripk1       |
| 0.0016241621534621  | 0.460307176481874  | 1 | 1 | Angptl2     |
| 0.00162503843875852 | 0.385015375509678  | 1 | 1 | Anapc13     |
| 0.00165007254130987 | 0.486248037040465  | 1 | 1 | Unc5b       |
| 0.00166016124887284 | 0.584773654539747  | 1 | 1 | N6amt2      |
| 0.00166099122189853 | 0.739292120813183  | 1 | 1 | Sh3kbp1     |
| 0.00168590674037402 | -0.906445813878147 | 1 | 1 | Plin4       |
| 0.00168811512093806 | 0.652505347716003  | 1 | 1 | Ptpfr       |
| 0.00169495584080872 | 0.504922889130567  | 1 | 1 | Dclk1       |
| 0.00169822373544409 | 0.432759356433021  | 1 | 1 | 1500009L16F |
| 0.00170401451799607 | 0.440278750412305  | 1 | 1 | 1810026J23F |
| 0.00172765652777662 | 0.407503823699506  | 1 | 1 | Atp7a       |
| 0.00176029371964962 | 0.585722777810985  | 1 | 1 | Fut11       |
| 0.00176768928467329 | 0.402818927833773  | 1 | 1 | Clpx        |
| 0.00177160049528805 | -0.465749456174751 | 1 | 1 | Rock1       |
| 0.00179964219892342 | 0.316907497503113  | 1 | 1 | Plin3       |
| 0.00182423193407828 | 0.290834644572026  | 1 | 1 | Rnps1       |
| 0.00183406103561566 | 0.394131414072618  | 1 | 1 | Egfr        |
| 0.00183993040881861 | -0.494729666696668 | 1 | 1 | Hdac5       |
| 0.00184841723128904 | 0.308122875985927  | 1 | 1 | Otub1       |
| 0.00185443150068525 | -1.10946761        | 1 | 1 | Dock9       |
| 0.00185633421975706 | -0.30162906        | 1 | 1 | Itgb1       |
| 0.00188797855987147 | 0.528454246592683  | 1 | 1 | Ap1s1       |
| 0.00190081394781096 | -0.305715818444951 | 1 | 1 | Mbnl1       |
| 0.00192363191541662 | 0.371984690875022  | 1 | 1 | Tmbim1      |
| 0.0019395918064571  | -0.821003581978432 | 1 | 1 | Skap2       |
| 0.00195413139055678 | 0.261138826932302  | 1 | 1 | Atp6ap2     |
| 0.00196989539207877 | 0.333559589238368  | 1 | 1 | Tars        |

|                     |                    |   |   |             |
|---------------------|--------------------|---|---|-------------|
| 0.00197343515504094 | 0.427012189718931  | 1 | 1 | Nans        |
| 0.00198128470327962 | 0.551523128813753  | 1 | 1 | Comp        |
| 0.00198582677783556 | 0.322541721594739  | 1 | 1 | Mrpl52      |
| 0.00199892920686473 | -0.431183264085241 | 1 | 1 | Ptplad2     |
| 0.00203562883232775 | 0.642238795731697  | 1 | 1 | Plekha6     |
| 0.00204894236504718 | 0.267021375285303  | 1 | 1 | Ywhaq       |
| 0.00205180636449734 | -0.350554338543652 | 1 | 1 | Gm15417     |
| 0.0020573766624674  | 0.262103693122016  | 1 | 1 | Glis2       |
| 0.00206443890106217 | 0.399342563097135  | 1 | 1 | Cab39l      |
| 0.00209125918731674 | -0.450168532909349 | 1 | 1 | Flnc        |
| 0.00209266675443814 | 0.828086188949425  | 1 | 1 | Mphosph10   |
| 0.00209577733661404 | -0.564347358       | 1 | 1 | 5031426D15f |
| 0.0021217988108841  | 0.388020803457588  | 1 | 1 | Pnkd        |
| 0.00213091762605045 | 0.526455088        | 1 | 1 | Rnf38       |
| 0.0021372015328351  | 0.457123529129464  | 1 | 1 | Abhd4       |
| 0.00213758407729911 | 0.295928130132372  | 1 | 1 | Dram2       |
| 0.0021776806290297  | 0.357443115392643  | 1 | 1 | H2afz       |
| 0.00218491639640556 | 0.298941597404884  | 1 | 1 | Ostc        |
| 0.00221733522105972 | 0.485931717412265  | 1 | 1 | Gli3        |
| 0.00222050933987975 | -0.588869390955057 | 1 | 1 | Efna5       |
| 0.00222087345875389 | 0.354946449956992  | 1 | 1 | Arhgef40    |
| 0.00222631839763959 | 0.253217596643937  | 1 | 1 | Gnpda2      |
| 0.00222685891861559 | 0.299211543406806  | 1 | 1 | 2010107E04F |
| 0.00222770817407833 | -0.658281880518212 | 1 | 1 | Osr1        |
| 0.00222814891637777 | 0.355775647962689  | 1 | 1 | Fkbp3       |
| 0.00224076289920293 | 0.500824961392504  | 1 | 1 | Arhgdib     |
| 0.00226418097660207 | 0.608544591        | 1 | 1 | Dip2a       |
| 0.00226435614720415 | 0.592862689014381  | 1 | 1 | Fam111a     |
| 0.00226942620589511 | 0.525164992520303  | 1 | 1 | Fcf1        |
| 0.00229241111461026 | -0.499269038490183 | 1 | 1 | Pls3        |
| 0.00229408291230083 | 0.466042275952897  | 1 | 1 | Gpn3        |
| 0.00230021464648397 | -0.388175465083441 | 1 | 1 | Prpsap1     |
| 0.00231093974860088 | 0.401254329        | 1 | 1 | Cd320       |
| 0.00234337336863007 | -1.054800001       | 1 | 1 | Filip1      |
| 0.00235766593485351 | 0.588591493919406  | 1 | 1 | Pex5        |
| 0.00236325803649388 | 0.328970328047665  | 1 | 1 | Srp19       |
| 0.00236922114623133 | -0.414631152113076 | 1 | 1 | Phactr2     |
| 0.00242638774890295 | -0.700756368367504 | 1 | 1 | Trabd2b     |
| 0.0024451471232643  | 0.274841024165849  | 1 | 1 | Jade1       |
| 0.00246063971488041 | 0.269497626216546  | 1 | 1 | Elovl5      |
| 0.00246221576123977 | 0.420379088110806  | 1 | 1 | Rhobtb3     |
| 0.00246861418240718 | -1.152253936       | 1 | 1 | Etl4        |
| 0.00247406185011045 | 0.580116866928434  | 1 | 1 | Dguok       |
| 0.00248798355398919 | 0.381431830309125  | 1 | 1 | Aimp1       |
| 0.00250575996958341 | 0.584253092320808  | 1 | 1 | Polr2d      |
| 0.00252855943465477 | 0.364262205191772  | 1 | 1 | Scp2        |
| 0.00253442752210674 | -1.841281749       | 1 | 1 | 1190005I06R |
| 0.00253756695007684 | 0.461970052428875  | 1 | 1 | Polr2h      |
| 0.00257203598200897 | 0.321692419935264  | 1 | 1 | F2r         |
| 0.00257793185300155 | -0.953478242754745 | 1 | 1 | Efhd1       |
| 0.00257878906316051 | -0.802525823623827 | 1 | 1 | Lama5       |
| 0.00258322448640397 | 0.308950017137832  | 1 | 1 | Rbm15b      |
| 0.00262828056473377 | 0.401732557337718  | 1 | 1 | Tspan12     |
| 0.00268254199094124 | 0.299261475        | 1 | 1 | Rps23       |
| 0.00272023964405051 | -0.253004205210035 | 1 | 1 | Ctdspl      |
| 0.00274357870770134 | 0.296157330225055  | 1 | 1 | Epb4.1l2    |

|                     |                    |   |   |           |
|---------------------|--------------------|---|---|-----------|
| 0.00275456845256406 | 0.258912043844328  | 1 | 1 | Rora      |
| 0.00277973932613857 | 0.279320254346198  | 1 | 1 | Nqo2      |
| 0.00279505451905569 | 0.318586105056191  | 1 | 1 | Prmt2     |
| 0.00282509293302528 | 0.419731790146955  | 1 | 1 | Acot10    |
| 0.00287085894876965 | 0.590131140104999  | 1 | 1 | Sp3os     |
| 0.00287594129772382 | 0.324773198189509  | 1 | 1 | Slc16a9   |
| 0.00294186850472693 | 0.632903445235206  | 1 | 1 | Cblb      |
| 0.00294621892714448 | -0.519511919154515 | 1 | 1 | Mob2      |
| 0.00298560000165976 | 0.584709153668963  | 1 | 1 | Epb4.1l3  |
| 0.00298642794005637 | 0.392718182        | 1 | 1 | Rel       |
| 0.00302558610437291 | 0.396451288340987  | 1 | 1 | Nid2      |
| 0.0030401210240365  | 0.312479514452543  | 1 | 1 | Il1rap    |
| 0.00305687033259939 | 0.45061642         | 1 | 1 | Thbs3     |
| 0.00324106506464083 | 0.397070334790324  | 1 | 1 | Adamtsl2  |
| 0.00328015322783021 | 0.326725237430335  | 1 | 1 | Abce1     |
| 0.00336651309903236 | -0.705728700868726 | 1 | 1 | Nacc2     |
| 0.00339351215140328 | -0.849670741205978 | 1 | 1 | Ptgs1     |
| 0.00341991568998439 | 0.628501812412201  | 1 | 1 | Derl2     |
| 0.00344919444847441 | -0.375023001744357 | 1 | 1 | Ablim1    |
| 0.00344973822522646 | -0.375280637025564 | 1 | 1 | Atp13a1   |
| 0.00345274592430094 | 0.339451713115433  | 1 | 1 | Eif2s1    |
| 0.00348002623829926 | -1.059765821       | 1 | 1 | Fam13c    |
| 0.00355327158548477 | -1.087098273       | 1 | 1 | Adh7      |
| 0.003570961422857   | -0.398478343009293 | 1 | 1 | Gnaq      |
| 0.00371814265488264 | 0.292920936731448  | 1 | 1 | Arcn1     |
| 0.0037365038575874  | 0.315399675816518  | 1 | 1 | Psmb5     |
| 0.00375491273742417 | 0.327856557714605  | 1 | 1 | Rpl23     |
| 0.00378106760757571 | 0.366324696168373  | 1 | 1 | Lemd3     |
| 0.00378601623289155 | 0.262866191890179  | 1 | 1 | Ganab     |
| 0.00379729874937103 | 0.305095596589335  | 1 | 1 | Nbl1      |
| 0.00381009669495474 | 0.250179529809209  | 1 | 1 | Erp44     |
| 0.00382806571826389 | -0.250199998918764 | 1 | 1 | Hp        |
| 0.00385880499308857 | -0.559916500078714 | 1 | 1 | Pdlim1    |
| 0.00388683500727535 | 0.306918906521572  | 1 | 1 | Cdon      |
| 0.00389181291339044 | -1.178377621       | 1 | 1 | Sorbs2    |
| 0.00391004177060588 | 0.383133170317754  | 1 | 1 | Sugt1     |
| 0.00392503602256291 | 0.508065110299318  | 1 | 1 | Cxcl16    |
| 0.00395741287691855 | 0.382130230762449  | 1 | 1 | Rwdd1     |
| 0.00400749397500704 | -0.784282341974816 | 1 | 1 | Figf      |
| 0.00403614515631929 | 0.250002059403106  | 1 | 1 | Igsf8     |
| 0.0041028497764413  | 0.814652665865964  | 1 | 1 | Stk32b    |
| 0.00410926276016299 | 0.644697589130001  | 1 | 1 | Lgals3    |
| 0.00414159351374101 | 0.343670078436318  | 1 | 1 | Sept11    |
| 0.00415822372243432 | -0.537579364628073 | 1 | 1 | Phldb2    |
| 0.00417301233632674 | 0.290636284349213  | 1 | 1 | Serpinb1a |
| 0.00418384383358611 | 0.500201756959655  | 1 | 1 | Cln5      |
| 0.00419157573541728 | -0.470925607350057 | 1 | 1 | Mef2c     |
| 0.0042234779859408  | 0.473180134793994  | 1 | 1 | Fkbp5     |
| 0.00423008607722109 | 0.887850694471513  | 1 | 1 | Cilp      |
| 0.00423108383876883 | 0.269291176307785  | 1 | 1 | Brox      |
| 0.00423538916098184 | 0.656334452043159  | 1 | 1 | Tln2      |
| 0.0042457280655495  | 0.281192797181604  | 1 | 1 | Zfp451    |
| 0.00425660816720467 | 0.450485119695655  | 1 | 1 | Loxl2     |
| 0.004257619422786   | 0.506704334447222  | 1 | 1 | Rps12     |
| 0.00429481010632614 | -1.113474433       | 1 | 1 | Hoxa5     |
| 0.00429555580867144 | 0.523454193752451  | 1 | 1 | Ebf2      |

|                     |                    |   |   |             |
|---------------------|--------------------|---|---|-------------|
| 0.0043165996061272  | 0.344591685        | 1 | 1 | Mxd4        |
| 0.00434324531370742 | 0.883783549546533  | 1 | 1 | Piezo2      |
| 0.00434344931922143 | 0.251806806116148  | 1 | 1 | Ppic        |
| 0.00440172112957196 | 0.310434857368126  | 1 | 1 | Rnh1        |
| 0.00448626260813622 | 0.337628004403288  | 1 | 1 | Cdc14b      |
| 0.00448732994033416 | -1.023765651       | 1 | 1 | Selp        |
| 0.00451362254161147 | 0.322837538817494  | 1 | 1 | Man2a1      |
| 0.004517855249875   | -1.450649616       | 1 | 1 | Pcp4l1      |
| 0.00452967216165553 | -0.896740917118824 | 1 | 1 | Ntrk3       |
| 0.00455376552837369 | -1.022237037       | 1 | 1 | Prdm16      |
| 0.00459860128757851 | 0.462979268160653  | 1 | 1 | H2-T23      |
| 0.00460921999707342 | 0.480036087365061  | 1 | 1 | Xpnpep1     |
| 0.00461385997346926 | 0.321135290068744  | 1 | 1 | Snrpe       |
| 0.00462943105835209 | 0.259983582742231  | 1 | 1 | Rer1        |
| 0.00463506258926945 | -1.119137226       | 1 | 1 | Rbpms2      |
| 0.00465994751646473 | 0.299645161        | 1 | 1 | Seh1l       |
| 0.00466162397262805 | 0.271800619139137  | 1 | 1 | Pdzrn3      |
| 0.00467962962422884 | 0.263956972958687  | 1 | 1 | Runx1       |
| 0.00469323069665905 | -0.383709395389029 | 1 | 1 | Sh3pxd2a    |
| 0.00469477455287971 | 0.474155048021554  | 1 | 1 | Traf3       |
| 0.00471197932734125 | -0.632642478808876 | 1 | 1 | Fyco1       |
| 0.00472437379830344 | 0.520407029913829  | 1 | 1 | Gnptab      |
| 0.00473135175441992 | -0.316777851089692 | 1 | 1 | Ccdc107     |
| 0.00474760248801855 | -0.491160559193605 | 1 | 1 | Emb         |
| 0.00475577766414015 | 0.458879887397749  | 1 | 1 | Mios        |
| 0.00477706936746129 | 0.508616761820006  | 1 | 1 | Ccng2       |
| 0.00478138949750131 | 0.555801671096415  | 1 | 1 | Rab31       |
| 0.00478677352351435 | 0.603282209        | 1 | 1 | Thyn1       |
| 0.00479646692337685 | 0.398217530763894  | 1 | 1 | Knop1       |
| 0.00481979190449725 | -0.889511949336631 | 1 | 1 | Plekhg3     |
| 0.00483919610931401 | 0.504710009938704  | 1 | 1 | Bach1       |
| 0.00490666619745646 | 0.411924545805676  | 1 | 1 | Dennd2a     |
| 0.00493178231472797 | 0.564325178223121  | 1 | 1 | Dirc2       |
| 0.00495407611910052 | 0.306493705        | 1 | 1 | Rnf44       |
| 0.00495861950489732 | 0.307095764878302  | 1 | 1 | Vamp5       |
| 0.00496083652602693 | 0.309705052012231  | 1 | 1 | Sf3b6       |
| 0.00497977351309497 | 0.357862132362245  | 1 | 1 | Cnpy2       |
| 0.0050062720872521  | -0.492955665181601 | 1 | 1 | Thrb        |
| 0.00502524162660401 | 0.791790828182336  | 1 | 1 | Prrx2       |
| 0.00502653686281314 | 0.535460724486461  | 1 | 1 | 0610009B22I |
| 0.00502721080673328 | 0.563187010859392  | 1 | 1 | Negr1       |
| 0.0050914816891749  | 0.431052842716672  | 1 | 1 | Acvr1       |
| 0.0050953304894354  | 0.276792798360799  | 1 | 1 | Lamtor4     |
| 0.00510771226500115 | 0.456971933118983  | 1 | 1 | Prrc1       |
| 0.0051583303384621  | -0.718319976834659 | 1 | 1 | Plxna2      |
| 0.00518424421039189 | -0.772385059216195 | 1 | 1 | Osbpl3      |
| 0.00520545309746299 | 0.444593185556166  | 1 | 1 | Ubtd2       |
| 0.00523866003428097 | 0.252449541014906  | 1 | 1 | Lman2       |
| 0.00524498712961469 | 0.558990110400843  | 1 | 1 | LOC1026365  |
| 0.00532136793337548 | 0.264182969        | 1 | 1 | Ston2       |
| 0.00532712833019247 | 0.264452962991044  | 1 | 1 | Vit         |
| 0.00533859453412827 | 0.414554396105065  | 1 | 1 | Adpgk       |
| 0.00536045052946542 | 0.463428351        | 1 | 1 | Hsdl2       |
| 0.00538295997168994 | -1.123299486       | 1 | 1 | Mtss1       |
| 0.00547259120982052 | -1.032715591       | 1 | 1 | Tnk2        |
| 0.00548874879660109 | -0.460879691814484 | 1 | 1 | Unc45a      |

|                     |                    |   |   |             |
|---------------------|--------------------|---|---|-------------|
| 0.00549029279597775 | -1.346539352       | 1 | 1 | She         |
| 0.00550880340576714 | 0.432896258343016  | 1 | 1 | B9d2        |
| 0.00551017147938819 | -0.504433556547332 | 1 | 1 | Tle4        |
| 0.00551889695489965 | -1.410595453       | 1 | 1 | Gja5        |
| 0.00558398124916818 | 0.265792109965031  | 1 | 1 | Rab32       |
| 0.00561202213750437 | 0.31048146         | 1 | 1 | Zc3h14      |
| 0.00562355484003757 | 0.2759122944448529 | 1 | 1 | Zrsr2       |
| 0.00564819819179895 | 0.651088305        | 1 | 1 | Pole3       |
| 0.00565814430777654 | 0.267420369824372  | 1 | 1 | Zfp91       |
| 0.00566179469221114 | -1.065730115       | 1 | 1 | Sult5a1     |
| 0.00584469402409612 | 0.390910337305621  | 1 | 1 | Gas7        |
| 0.0058468640391631  | 0.738643955        | 1 | 1 | Dlg5        |
| 0.00585325090703229 | -0.881215331775095 | 1 | 1 | Slc25a23    |
| 0.00586620310760543 | 0.629518153097272  | 1 | 1 | Naa60       |
| 0.00591632202474623 | 0.339710736788863  | 1 | 1 | P2rx4       |
| 0.00592723205369633 | -0.796718776584736 | 1 | 1 | Ctnnal1     |
| 0.00599033063780622 | 0.444428412720496  | 1 | 1 | Zfp827      |
| 0.0060028716477709  | 0.616786081896311  | 1 | 1 | Sac3d1      |
| 0.00603701377826489 | 0.291345596346343  | 1 | 1 | Srp14       |
| 0.00608378497079773 | 0.363635743148878  | 1 | 1 | Mcc         |
| 0.0061019604166507  | 0.311563804455168  | 1 | 1 | Slc41a1     |
| 0.00611629557353514 | 0.380687493863735  | 1 | 1 | Actr6       |
| 0.00612053089660369 | -0.271100161812269 | 1 | 1 | Ankle2      |
| 0.00617468026322648 | 0.566689523382107  | 1 | 1 | 2310033P09F |
| 0.00619214468988115 | 0.335095659075644  | 1 | 1 | Ppp2r3c     |
| 0.00622578173910181 | 0.939040736815685  | 1 | 1 | Myoc        |
| 0.00634966472126914 | 0.483525139169717  | 1 | 1 | Tiam1       |
| 0.00636109513076951 | 0.375269074613618  | 1 | 1 | Eif4e2      |
| 0.00639513432956973 | -0.512854506       | 1 | 1 | Polr2b      |
| 0.00644379554235094 | 0.758440299166676  | 1 | 1 | Ifit3       |
| 0.00647654524694614 | 0.364159214070672  | 1 | 1 | Psmd14      |
| 0.00652353493126031 | -0.553166328893567 | 1 | 1 | Calcr1      |
| 0.00654239569477873 | 0.256294628708674  | 1 | 1 | Prkra       |
| 0.0065962439977866  | 0.340626520879406  | 1 | 1 | Nadk        |
| 0.00660223731882774 | 0.620872720869985  | 1 | 1 | Naalad2     |
| 0.00667567104456052 | -0.767747962       | 1 | 1 | Ppp1r12b    |
| 0.00674656715293822 | 0.752697425450622  | 1 | 1 | Myo5a       |
| 0.00678251942435582 | 0.488340592602104  | 1 | 1 | Tstd2       |
| 0.00678512298781249 | -0.670125311       | 1 | 1 | Dstn        |
| 0.00678696059990258 | 0.539801329749974  | 1 | 1 | Tm2d3       |
| 0.0067982228078542  | 0.259685333884578  | 1 | 1 | Abhd12      |
| 0.00681906396109179 | 0.375346124722269  | 1 | 1 | Cox16       |
| 0.00683870831072945 | 0.414846478929949  | 1 | 1 | Pld1        |
| 0.00683909354844712 | 0.386589965280372  | 1 | 1 | Sav1        |
| 0.0069757204102362  | 0.671945151940268  | 1 | 1 | Osbpl8      |
| 0.00699373079580032 | 0.324524273195571  | 1 | 1 | Maob        |
| 0.00714819981744799 | 0.722002947        | 1 | 1 | Ifih1       |
| 0.00715008583065774 | 0.830813607100086  | 1 | 1 | Dut         |
| 0.00717568302450261 | 0.462623521948113  | 1 | 1 | Cmtr1       |
| 0.00725639317013035 | 0.567487532572365  | 1 | 1 | Rtkn        |
| 0.00737147371542448 | -0.280547114619002 | 1 | 1 | Hsph1       |
| 0.00740027139220972 | -0.453646387220964 | 1 | 1 | Mkl2        |
| 0.00743192900467899 | -0.326748829       | 1 | 1 | Mapkap1     |
| 0.00745992776386725 | -0.401964368681794 | 1 | 1 | Samd4       |
| 0.00756049386484447 | 0.284664795122792  | 1 | 1 | Copb2       |
| 0.00756623012330358 | 0.345065369807638  | 1 | 1 | Nabp2       |



|                     |                    |   |   |             |
|---------------------|--------------------|---|---|-------------|
| 0.00757023152647665 | -0.455799240582065 | 1 | 1 | Insr        |
| 0.00760109194692837 | 0.778704519557134  | 1 | 1 | Ifit1       |
| 0.00764713994911929 | 0.370289724674583  | 1 | 1 | A830080D01  |
| 0.00771994003771141 | 0.488391328820889  | 1 | 1 | Tcp11l2     |
| 0.00784715435165332 | 0.281886655289954  | 1 | 1 | Mapre3      |
| 0.00787852004697869 | -0.678075781582342 | 1 | 1 | Plcd1       |
| 0.00793828782800322 | -0.479601603070244 | 1 | 1 | Lbh         |
| 0.00795339274168248 | -0.593499017       | 1 | 1 | F11r        |
| 0.00796744342671959 | 0.43661591         | 1 | 1 | Wdr77       |
| 0.0080012426000469  | 0.379934152886822  | 1 | 1 | Tgfb3       |
| 0.00802333348113006 | 0.558020779692191  | 1 | 1 | 9130401M01  |
| 0.00805428258935535 | -0.730815506       | 1 | 1 | Tbx18       |
| 0.00809760448443237 | 0.545106381979667  | 1 | 1 | Xaf1        |
| 0.00817164581798037 | 0.254389405832732  | 1 | 1 | Tug1        |
| 0.00831526515424338 | -0.562600842613144 | 1 | 1 | Hspb2       |
| 0.00849412807364314 | 0.272575187838113  | 1 | 1 | Nedd9       |
| 0.0086437767364157  | 0.491448133        | 1 | 1 | Rap2b       |
| 0.00876893986710614 | -0.505708623371293 | 1 | 1 | Tmpo        |
| 0.0087722963379842  | -0.853007712       | 1 | 1 | Itga7       |
| 0.00879201727373921 | 0.594075524184995  | 1 | 1 | Gng8        |
| 0.00880970125449205 | -0.484008708776015 | 1 | 1 | Pdcd4       |
| 0.00884061179336609 | 0.648976395793713  | 1 | 1 | Ttc7        |
| 0.00885619629231613 | 0.408141345        | 1 | 1 | Gab2        |
| 0.00890868887699721 | 0.382723904890063  | 1 | 1 | Fam220a     |
| 0.00894006941703659 | -0.567664608331984 | 1 | 1 | Heg1        |
| 0.00895457014760371 | 0.415894650499661  | 1 | 1 | Tubgcp3     |
| 0.00896154722010853 | 0.387720217        | 1 | 1 | Yipf1       |
| 0.00901561985195815 | -0.872234136847954 | 1 | 1 | 2900026A02F |
| 0.00916396092172892 | 0.387230429082234  | 1 | 1 | 2510039O18  |
| 0.0092184360513801  | -0.547778751390462 | 1 | 1 | Mtus1       |
| 0.00929813846940229 | 0.407947588807129  | 1 | 1 | Mpp1        |
| 0.00942454538455703 | 0.350441400769128  | 1 | 1 | Pgrmc1      |
| 0.00944467151994978 | -0.771073788955601 | 1 | 1 | Plekha1     |
| 0.00946808581900639 | -0.511583560482079 | 1 | 1 | Flnb        |
| 0.00949543713934722 | -0.475301975805669 | 1 | 1 | Ktn1        |
| 0.00953980225295212 | 0.324182015629785  | 1 | 1 | Smim7       |
| 0.00955090078973134 | 0.290455777123419  | 1 | 1 | Tmem64      |
| 0.00959605581188025 | 0.565849208960552  | 1 | 1 | Vps4a       |
| 0.00962128808268694 | 0.367043213        | 1 | 1 | Pfn2        |
| 0.00964379675819161 | 0.386350085876728  | 1 | 1 | Alg14       |
| 0.00965665897625371 | -0.402776205       | 1 | 1 | Pde4dip     |
| 0.00973450247346472 | 0.556551413407628  | 1 | 1 | Fam104a     |
| 0.00976868036461321 | 0.361539200063032  | 1 | 1 | Llph        |
| 0.00989373876734698 | 0.338076893410551  | 1 | 1 | Arl5a       |
| 0.00993556804402686 | -0.983984825210536 | 1 | 1 | Slc9a3r2    |

| p_val                | avg_logFC          | p_val_adj            | cluster | gene       |
|----------------------|--------------------|----------------------|---------|------------|
| 5.6273920069279e-25  | 0.905809712346525  | 7.77199110076812e-21 | 2       | Mmp3       |
| 3.67705218517664e-24 | 0.861055956029762  | 5.07837677294745e-20 | 2       | Gpx3       |
| 3.93889337797183e-24 | 0.911509595415816  | 5.44000564431689e-20 | 2       | 1500015O10 |
| 1.98707012252282e-22 | 0.948396330867066  | 2.74434254621627e-18 | 2       | Ltbp2      |
| 3.16059725008836e-21 | 0.866007196605403  | 4.36510086209703e-17 | 2       | Serpina3n  |
| 1.4463209240468e-20  | 0.888148433228801  | 1.99751382820103e-16 | 2       | Comp       |
| 4.54288775470074e-20 | 0.909291335399861  | 6.27418227801719e-16 | 2       | Prg4       |
| 2.31134121315462e-19 | 0.846940327682896  | 3.19219334948785e-15 | 2       | Timp1      |
| 4.60115259815401e-19 | 1.242965289        | 6.35465185331051e-15 | 2       | Hdac6      |
| 8.27835597117368e-19 | 0.717557164        | 1.1433237431788e-14  | 2       | Frzb       |
| 1.22851197349226e-18 | 0.674514534142804  | 1.69669788659015e-14 | 2       | Cxcl1      |
| 1.2789416847639e-18  | 1.093667411        | 1.76634636082742e-14 | 2       | Nr4a2      |
| 3.14033245218305e-18 | 0.748811600242197  | 4.33711314971001e-14 | 2       | Crispld2   |
| 1.41260026240158e-17 | -0.644085104815417 | 1.95094222240282e-13 | 2       | Gm1821     |
| 2.23726096121415e-17 | 0.666235120905436  | 3.08988111353286e-13 | 2       | Lamb1      |
| 2.31114743906261e-17 | 0.506252060410611  | 3.19192572808938e-13 | 2       | Col1a1     |
| 4.73266328854218e-17 | 1.371693012        | 6.53628126780561e-13 | 2       | Lcn2       |
| 4.95851394263347e-17 | 0.713161976927744  | 6.84820360617108e-13 | 2       | Sfrp2      |
| 5.55797333998376e-17 | 0.656559191606581  | 7.67611697985158e-13 | 2       | Ptgs2      |
| 1.89509866597847e-16 | 0.690656360466699  | 2.61732076758287e-12 | 2       | Il6        |
| 2.00245590071007e-16 | -0.759481654380287 | 2.76559184447068e-12 | 2       | Rps7       |
| 3.15430850921265e-16 | -0.692582822867611 | 4.3564154820736e-12  | 2       | Rps26      |
| 7.72133252394172e-16 | -0.566654262115971 | 1.06639323488159e-11 | 2       | Mir682     |
| 8.96924676487196e-16 | 0.646283014699409  | 1.23874267069647e-11 | 2       | Cfb        |
| 1.05066297261716e-15 | 1.000585807        | 1.45107063148155e-11 | 2       | Col8a1     |
| 1.17800067183052e-15 | 0.749982693003266  | 1.62693672786512e-11 | 2       | C4b        |
| 1.60313799260118e-15 | 0.544423867042792  | 2.21409388158149e-11 | 2       | Ccdc80     |
| 1.75259224696592e-15 | 0.452937521564567  | 2.42050515228464e-11 | 2       | Matn2      |
| 2.34841623631182e-15 | 0.561964683897303  | 3.24339766397025e-11 | 2       | C3         |
| 2.56242897100877e-15 | 0.596735679        | 3.53897065186022e-11 | 2       | Ccl7       |
| 3.15606094960639e-15 | 0.869990447235942  | 4.35883577750139e-11 | 2       | Anxa8      |
| 4.03550064774137e-15 | -0.572648598249996 | 5.57342994459561e-11 | 2       | Prdx1      |
| 4.40979993309134e-15 | 0.977687875579306  | 6.09037468759245e-11 | 2       | Il33       |
| 4.52020914314964e-15 | -0.583630472251218 | 6.24286084760397e-11 | 2       | Rps21      |
| 5.34777995132161e-15 | 0.631877538387573  | 7.38581889077028e-11 | 2       | Cygb       |
| 8.90693410005813e-15 | -0.600207137553159 | 1.23013666855903e-10 | 2       | Lars2      |
| 1.11364671095017e-14 | 0.670736681257863  | 1.53805747249328e-10 | 2       | Fam46a     |
| 1.5249628532768e-14  | 1.037672741        | 2.10612619666059e-10 | 2       | Gpm6b      |
| 1.97305784480224e-14 | -0.577006840061711 | 2.72499018945638e-10 | 2       | Tmsb4x     |
| 3.26867064716039e-14 | 0.541726277358457  | 4.51436103079322e-10 | 2       | Penk       |
| 6.01990612277582e-14 | 0.759904821892754  | 8.31409234616568e-10 | 2       | Tnfaip6    |
| 6.32768433398063e-14 | 0.775451995559073  | 8.73916483366065e-10 | 2       | Lpl        |
| 6.72976140789708e-14 | 1.014514444        | 9.29447348044666e-10 | 2       | Rhou       |
| 7.04927502721508e-14 | 0.614724310602952  | 9.73575374008675e-10 | 2       | Lgals3bp   |
| 7.13523197880648e-14 | 0.539593888536588  | 9.85446888592962e-10 | 2       | Efemp1     |
| 1.15968225183621e-13 | 0.543644589        | 1.60163715801100e-09 | 2       | Dpep1      |
| 1.21492211213387e-13 | 0.410573736709666  | 1.67792892906808e-09 | 2       | Inmt       |
| 1.23609300278442e-13 | -0.688961774       | 1.70716804614556e-09 | 2       | Tpt1       |
| 1.27988694377533e-13 | 0.722135401483638  | 1.76765185804811e-09 | 2       | Cnot6      |
| 1.51880434347138e-13 | 0.605229604498587  | 2.09762067876833e-09 | 2       | Fmod       |
| 1.78951187330171e-13 | 0.716813894805915  | 2.47149484821699e-09 | 2       | Slc16a2    |
| 1.8842131550718e-13  | 0.576443359983759  | 2.60228678846967e-09 | 2       | Uhrf1bp1   |
| 2.22599933645349e-13 | -0.403778055831186 | 3.07432768357591e-09 | 2       | Rps3a1     |
| 2.44843077857491e-13 | 0.646120518344529  | 3.3815277482898e-09  | 2       | Adamts5    |
| 3.28029133080022e-13 | 0.489509890443364  | 4.53041035696819e-09 | 2       | Gja1       |

|                      |                    |                      |   |             |
|----------------------|--------------------|----------------------|---|-------------|
| 3.65935566125334e-13 | 0.559786088569672  | 5.05393610375699e-09 | 2 | Cxcl12      |
| 4.37302053438819e-13 | -0.410220261642752 | 6.03957866004353e-09 | 2 | Pfn1        |
| 1.02315917124979e-12 | 0.509422318816299  | 1.41308513141309e-08 | 2 | Cp          |
| 1.25099144464799e-12 | 0.321021329066561  | 1.72774428420333e-08 | 2 | Osmr        |
| 1.39907128568228e-12 | 0.408432503850979  | 1.9322573526558e-08  | 2 | Mt2         |
| 1.66243408825703e-12 | 0.624346777864458  | 2.29598771929178e-08 | 2 | Nfkbiz      |
| 1.82880274503523e-12 | 0.276846974946861  | 2.52575947116815e-08 | 2 | Cpxm2       |
| 1.96412296043235e-12 | 0.589350891500515  | 2.71265022065312e-08 | 2 | Trf         |
| 3.03399951435563e-12 | 0.533713135003123  | 4.19025672927656e-08 | 2 | Xdh         |
| 3.20377928341808e-12 | -0.598930952707561 | 4.42473956832872e-08 | 2 | Rpl35a      |
| 3.42643138347662e-12 | 0.507470523473659  | 4.73224438371956e-08 | 2 | Spon1       |
| 3.91815728830226e-12 | 0.492740188560751  | 5.41136703087425e-08 | 2 | Wisp2       |
| 4.95284804454562e-12 | 1.112729604        | 6.84037843432196e-08 | 2 | Slfn2       |
| 4.96646353244664e-12 | 0.800222153570421  | 6.85918278466205e-08 | 2 | Cxcl2       |
| 5.09840235677503e-12 | 0.872206866988633  | 7.04140349494199e-08 | 2 | Itih5       |
| 5.34079279995794e-12 | 0.542733039718391  | 7.37616893602191e-08 | 2 | Vcan        |
| 7.04448202285006e-12 | -0.848960417       | 9.72913412175822e-08 | 2 | Rpl37a      |
| 7.06886660012223e-12 | 0.626849309290806  | 9.76281166142881e-08 | 2 | Ctsk        |
| 7.25518734546405e-12 | 0.503938051858348  | 1.00201392428204e-07 | 2 | Lum         |
| 7.68373929398646e-12 | -0.514014711835499 | 1.06120123389247e-07 | 2 | Cd9         |
| 8.55218368671021e-12 | 0.965898081799931  | 1.18114208897155e-07 | 2 | Ppl         |
| 8.63501194549781e-12 | 0.748433045646465  | 1.1925814997927e-07  | 2 | Suv39h1     |
| 1.09412667194811e-11 | 0.534052351923052  | 1.51109834662754e-07 | 2 | Tmem176b    |
| 1.12752712360139e-11 | 0.512871413389654  | 1.55722771040588e-07 | 2 | Cpxm1       |
| 1.16064065172236e-11 | 0.818050930402238  | 1.60296080409375e-07 | 2 | Fbln7       |
| 1.24706619664501e-11 | 0.261036448554526  | 1.72232312418642e-07 | 2 | Steap4      |
| 1.50474361219416e-11 | 0.498063931926953  | 2.07820140280135e-07 | 2 | Scarf2      |
| 1.59080119045267e-11 | 0.451325382177643  | 2.19705552413419e-07 | 2 | C7          |
| 1.98655654275354e-11 | 0.671775941974538  | 2.74363324119691e-07 | 2 | Col16a1     |
| 2.02598990942768e-11 | -0.417661811432479 | 2.79809466391056e-07 | 2 | Gm6654      |
| 2.02807940875757e-11 | -0.522899396582455 | 2.80098047143508e-07 | 2 | Cox6c       |
| 2.20484994667121e-11 | 0.484936575472729  | 3.04511826134761e-07 | 2 | Mmp2        |
| 2.44425455324923e-11 | -0.351115365633416 | 3.37575996349251e-07 | 2 | Rplp0       |
| 2.75340943442681e-11 | -0.356720765840464 | 3.80273376988686e-07 | 2 | Rps11       |
| 2.89570083214282e-11 | 0.480277921659531  | 3.99925241927244e-07 | 2 | Dpt         |
| 2.92289982765113e-11 | -0.346469341       | 4.03681695196898e-07 | 2 | Sepw1       |
| 2.99063044370884e-11 | -0.541488329042393 | 4.13035970580628e-07 | 2 | Rpl14-ps1   |
| 3.94553585292906e-11 | -0.265114362763128 | 5.44917956648032e-07 | 2 | NP-904340.1 |
| 3.95338932530232e-11 | -0.337332365513269 | 5.46002599717503e-07 | 2 | Rps20       |
| 4.23073577838289e-11 | -0.796306093382097 | 5.84306918352461e-07 | 2 | BC048507    |
| 4.71290501888037e-11 | 0.481350341205187  | 6.50899312157567e-07 | 2 | Tgfb1       |
| 5.48427836380849e-11 | 0.371728640486917  | 7.5743368482559e-07  | 2 | Vcam1       |
| 5.49550718435015e-11 | 0.887823983540512  | 7.58984497230599e-07 | 2 | S1pr3       |
| 7.89898642006242e-11 | 0.511200470355346  | 1.09092901447482e-06 | 2 | Slc7a2      |
| 8.3772742355905e-11  | 0.682831752566685  | 1.1569853446774e-06  | 2 | Gda         |
| 1.35375365024752e-10 | 0.507129675317076  | 1.86966916635685e-06 | 2 | Cxcl16      |
| 1.3819754466314e-10  | -0.413037766465425 | 1.90864628934262e-06 | 2 | Mir6236     |
| 1.48289759740291e-10 | 0.387650981353068  | 2.04802987177316e-06 | 2 | Ccl2        |
| 1.76681018330316e-10 | -0.509878334459268 | 2.44014154415999e-06 | 2 | Rps18       |
| 1.84359037402378e-10 | 0.332628531566546  | 2.54618266556424e-06 | 2 | Ifi27l2a    |
| 1.91790163488962e-10 | 0.431752357891688  | 2.64881394794605e-06 | 2 | Igfbp4      |
| 1.98334131260494e-10 | 0.413199815929699  | 2.73919268683868e-06 | 2 | Tgfb3       |
| 2.07893614950069e-10 | -0.330142733367225 | 2.8712187160754e-06  | 2 | Tmsb10      |
| 2.40571660277496e-10 | 0.424486875012946  | 3.3225352000925e-06  | 2 | Smoc2       |
| 2.47282911873132e-10 | 0.422618156620968  | 3.41522429587983e-06 | 2 | Baiap2      |
| 2.90414185048597e-10 | 0.307937202125321  | 4.01091030970617e-06 | 2 | Aldh1a1     |

|                      |                    |                      |   |            |
|----------------------|--------------------|----------------------|---|------------|
| 3.06559864169798e-10 | 0.442856859198209  | 4.23389828404907e-06 | 2 | Pid1       |
| 3.25000532837536e-10 | 1.023482306        | 4.4885823590192e-06  | 2 | Cxcl14     |
| 3.37010750665642e-10 | 0.362053185464652  | 4.65445547744318e-06 | 2 | Mmp14      |
| 4.07023603618645e-10 | 1.489211088        | 5.6214029895771e-06  | 2 | Pf4        |
| 4.10630790497424e-10 | 0.604374152139058  | 5.67122184755993e-06 | 2 | Bmp1       |
| 4.24843710652114e-10 | 0.465713082683763  | 5.86751648781635e-06 | 2 | Adamts2    |
| 5.04578099075979e-10 | 0.275307139024658  | 6.96872812633835e-06 | 2 | Lrrc59     |
| 5.2034958470537e-10  | 0.760029790118961  | 7.18654811436587e-06 | 2 | Pgf        |
| 5.27778030373977e-10 | 0.380999607207999  | 7.28914237749499e-06 | 2 | Meg3       |
| 5.38360267298899e-10 | 0.424158917338135  | 7.43529365166509e-06 | 2 | Scn7a      |
| 6.3434312390904e-10  | 0.459886733299434  | 8.76091288430776e-06 | 2 | Sod2       |
| 6.71490522348336e-10 | -0.618782114517929 | 9.27395560415287e-06 | 2 | Gm6251     |
| 6.75481173552703e-10 | 0.928536971192404  | 9.32907048793638e-06 | 2 | Gfra1      |
| 7.15581367216168e-10 | 0.417454093777727  | 9.88289426262249e-06 | 2 | Srrm2      |
| 7.74751227966309e-10 | 0.431824787021312  | 1.07000892094427e-05 | 2 | Cpz        |
| 7.79454819248789e-10 | 0.431478772796385  | 1.0765050508645e-05  | 2 | Smc5       |
| 7.91999764168108e-10 | -0.636370559530001 | 1.09383087429257e-05 | 2 | Rps8       |
| 7.9759748486303e-10  | -0.865053787857123 | 1.10156188634433e-05 | 2 | Gm6402     |
| 8.20396138399446e-10 | 0.306515825320542  | 1.13304910674347e-05 | 2 | Bud31      |
| 8.35985256463324e-10 | 0.430236788543565  | 1.1545792377015e-05  | 2 | Raph1      |
| 8.43930822847777e-10 | 0.664912838531427  | 1.16555285943506e-05 | 2 | Dclk1      |
| 9.06991803876058e-10 | -0.383628400318767 | 1.25264638033322e-05 | 2 | Rps15a-ps6 |
| 9.89352772743899e-10 | 1.202608939        | 1.3663951144366e-05  | 2 | Chil1      |
| 1.01440253674503e-09 | 0.506229702194739  | 1.40099134349856e-05 | 2 | Zfp704     |
| 1.08837101554621e-09 | -0.796359372522945 | 1.50314920957088e-05 | 2 | Mir684-1   |
| 1.10949473782045e-09 | 0.368425658479646  | 1.53232318240383e-05 | 2 | Htra3      |
| 1.13136088585747e-09 | 0.665885320983208  | 1.56252251945775e-05 | 2 | Nfkb1      |
| 1.1914779006797e-09  | 1.765470569        | 1.64555012862873e-05 | 2 | Chad       |
| 1.41188196714252e-09 | 0.488296697431587  | 1.94995018482053e-05 | 2 | Tcea3      |
| 1.47413050964891e-09 | -0.497321450723625 | 2.03592164687611e-05 | 2 | Gm12060    |
| 1.49575321709239e-09 | 0.514198219183452  | 2.0657847681263e-05  | 2 | Scara5     |
| 1.52756903457788e-09 | 0.545500814454462  | 2.10972559365551e-05 | 2 | Dio2       |
| 1.55024475334629e-09 | -0.481304154330503 | 2.14104302884656e-05 | 2 | Dynl1      |
| 1.68316493150135e-09 | 0.68142248         | 2.32461908689652e-05 | 2 | Tmem100    |
| 1.76995974545191e-09 | 0.713097075336616  | 2.44449140444364e-05 | 2 | C2         |
| 1.9149245235507e-09  | 0.406766801918891  | 2.64470225947587e-05 | 2 | Papss2     |
| 1.95695486944753e-09 | 0.413038479693937  | 2.70275037019399e-05 | 2 | Gsta3      |
| 2.05005594540404e-09 | -0.556067885333401 | 2.83133226619752e-05 | 2 | Rpl37      |
| 2.08652265285991e-09 | 0.330736275297583  | 2.88169643586482e-05 | 2 | Rcn1       |
| 2.08961782803063e-09 | 0.567273270258463  | 2.88597118229311e-05 | 2 | Ankrd17    |
| 2.29725733244647e-09 | 0.514141902667653  | 3.17274210184182e-05 | 2 | Usf2       |
| 2.40794153602712e-09 | 0.470839548440083  | 3.32560805540706e-05 | 2 | Col6a1     |
| 2.52208827679674e-09 | 0.414059537179815  | 3.48325611908398e-05 | 2 | Apod       |
| 2.52885404181837e-09 | 0.453730260354037  | 3.49260031715535e-05 | 2 | Snw1       |
| 2.66767312570947e-09 | 0.356875079586895  | 3.68432335391735e-05 | 2 | Hsd11b1    |
| 2.78803159890232e-09 | -0.398195325836117 | 3.850550441244E-05   | 2 | Mir703     |
| 2.83742293688486e-09 | 0.475654535763574  | 3.91876481813169e-05 | 2 | Zbed6      |
| 2.8516791878782e-09  | 0.731380956582941  | 3.93845412637858e-05 | 2 | Coq2       |
| 2.87853729778865e-09 | 0.564308438715781  | 3.9755478619759e-05  | 2 | Zeb2       |
| 2.8873839865446e-09  | 0.465882339926967  | 3.98776602381675e-05 | 2 | Nmb        |
| 2.9994684773875e-09  | 0.663002956212027  | 4.14256591411988e-05 | 2 | Unc5b      |
| 3.00838739692947e-09 | 0.252590844196817  | 4.15488383389929e-05 | 2 | Lrg1       |
| 3.22800438175417e-09 | 0.295111245112281  | 4.45819685164069e-05 | 2 | Igf1       |
| 3.35498590392825e-09 | 1.386247373        | 4.6335710319153e-05  | 2 | Slc10a6    |
| 3.41580745125458e-09 | 0.455294778809944  | 4.7175716709277e-05  | 2 | Cd248      |
| 3.71969626657712e-09 | -0.289211732641402 | 5.13727251376967e-05 | 2 | Jund       |



|                      |                    |                      |   |            |
|----------------------|--------------------|----------------------|---|------------|
| 4.08605740835587e-09 | -1.101269704       | 5.64325388668029e-05 | 2 | Btf3       |
| 4.25588605651658e-09 | 0.923930628861607  | 5.87780423265505e-05 | 2 | Trps1      |
| 4.3375839599285e-09  | 0.340929195923738  | 5.99063720705725e-05 | 2 | Birc3      |
| 4.37349130901252e-09 | 0.432377539632536  | 6.04022884687719e-05 | 2 | Arid4a     |
| 4.51911284330697e-09 | 0.432630362518145  | 6.24134674789126e-05 | 2 | Prelp      |
| 4.71856596072339e-09 | 0.420817706133195  | 6.51681144835508e-05 | 2 | Nop58      |
| 4.8142359371946e-09  | -0.373603679547427 | 6.64894125285946e-05 | 2 | Rps19-ps3  |
| 4.82582737161647e-09 | 0.747061834891181  | 6.66495018293951e-05 | 2 | LOC1026365 |
| 4.8981603121521e-09  | 0.322176765462004  | 6.76484920711327e-05 | 2 | Nid1       |
| 4.93435244506947e-09 | 0.465625671119984  | 6.81483416188544e-05 | 2 | Plce1      |
| 5.23464935965892e-09 | 0.635027602858496  | 7.22957423062493e-05 | 2 | Lamc3      |
| 5.61437493699924e-09 | 0.308696148987568  | 7.75401322548964e-05 | 2 | Bicc1      |
| 5.87955004433378e-09 | -0.300586002546188 | 8.12024656622938e-05 | 2 | Gm4832     |
| 6.07530021647554e-09 | 0.450902091        | 8.39059712897437e-05 | 2 | Aff3       |
| 6.83514024510926e-09 | 0.376765393846708  | 9.44001219252039e-05 | 2 | Akap12     |
| 7.04822660985849e-09 | 0.514966901        | 9.73430577087556e-05 | 2 | C1qtnf7    |
| 7.40400632027083e-09 | 0.403188270588043  | 0.00010225673128926  | 2 | Pdk3       |
| 8.6960893032504e-09  | -0.592648003973496 | 0.000120101689367191 | 2 | Rps16      |
| 8.98204599553854e-09 | 0.442452413255801  | 0.000124051037244383 | 2 | Gbp2       |
| 9.0712517686943e-09  | -0.356483653       | 0.000125283058177437 | 2 | Rps9       |
| 9.3877982465005e-09  | 0.533623222949287  | 0.000129654881582418 | 2 | Mfap4      |
| 9.40225245493674e-09 | 0.302636024310978  | 0.000129854508655131 | 2 | Zfp655     |
| 1.02162086264801e-08 | 0.507644218115443  | 0.000141096057340317 | 2 | Agpat2     |
| 1.02281540045054e-08 | -0.676789938535173 | 0.000141261034956224 | 2 | Uba52      |
| 1.03081571022547e-08 | 0.441444032286269  | 0.00014236595773924  | 2 | Sox9       |
| 1.06537995071822e-08 | 0.417131778108252  | 0.000147139624993693 | 2 | Dcn        |
| 1.07391736278729e-08 | 0.638197126969652  | 0.000148318726974553 | 2 | Marcks     |
| 1.1026630390574e-08  | 0.347739008824423  | 0.000152288792324218 | 2 | Tbk1       |
| 1.11435107606705e-08 | 0.285154633086025  | 0.00015390302711562  | 2 | Zfp622     |
| 1.15216978157336e-08 | 0.942367044699136  | 0.000159126168533096 | 2 | Zfp518b    |
| 1.23113949714494e-08 | 0.391516161048989  | 0.000170032675950688 | 2 | Larp4b     |
| 1.250633258948E-08   | 0.621549704        | 0.000172724959393308 | 2 | Dnm1       |
| 1.33461197879854e-08 | 0.437721967106782  | 0.000184323260391867 | 2 | Fbn1       |
| 1.36045258239101e-08 | 0.337444767072011  | 0.000187892106154022 | 2 | Fut10      |
| 1.37492967904546e-08 | 0.566516909        | 0.000189891537972969 | 2 | Ptpn1      |
| 1.40006100403851e-08 | 0.709212238506671  | 0.000193362425267759 | 2 | Mvk        |
| 1.71027705434318e-08 | 0.379063344623194  | 0.000236206363975337 | 2 | Meox2      |
| 1.72312621772133e-08 | 0.46064123         | 0.000237980961929493 | 2 | Stag1      |
| 1.74651839379827e-08 | 0.313938069655408  | 0.000241211655367479 | 2 | Col3a1     |
| 1.76416245630159e-08 | 0.440237352409079  | 0.000243648476839813 | 2 | Med13      |
| 1.76657612064698e-08 | 0.338059109942063  | 0.000243981828022555 | 2 | Tmem176a   |
| 1.85352683850753e-08 | 0.354614721690395  | 0.000255990591666274 | 2 | Crebbp     |
| 1.91256651142954e-08 | 0.358102437982364  | 0.000264144560893533 | 2 | Prkab2     |
| 1.92373165721986e-08 | -0.648938955774184 | 0.000265686579178635 | 2 | Shfm1      |
| 1.99843640092617e-08 | 0.390728474611453  | 0.000276004051331913 | 2 | Col14a1    |
| 2.08167157665252e-08 | 0.357906245261169  | 0.00028749966145148  | 2 | Aspn       |
| 2.09618058138662e-08 | 0.340932977821683  | 0.000289503500095307 | 2 | Amotl1     |
| 2.10062166552517e-08 | 0.454221878278495  | 0.000290116858225682 | 2 | Sh3d19     |
| 2.2580320347898e-08  | 0.514928414017504  | 0.000311856804324819 | 2 | Medag      |
| 2.40183895147765e-08 | -1.421065323       | 0.000331717977588578 | 2 | Ppp1r14a   |
| 2.59890373294888e-08 | 0.501987836775123  | 0.00035893459455757  | 2 | Thy1       |
| 2.78105457114048e-08 | 0.467285316363916  | 0.000384091446820212 | 2 | Col5a2     |
| 2.95545257570369e-08 | -0.518510765600686 | 0.000408177555230436 | 2 | Myl12b     |
| 2.98568447655625e-08 | 0.423398946763267  | 0.000412352883057184 | 2 | Tcn2       |
| 3.02832254744056e-08 | 0.448818351642806  | 0.000418241627027016 | 2 | Chpf       |
| 3.03551635333892e-08 | 0.340699122793932  | 0.000419235163559638 | 2 | Abca8a     |



|                      |                    |                      |   |          |
|----------------------|--------------------|----------------------|---|----------|
| 3.12396706448617e-08 | 0.447275041106438  | 0.000431451091276185 | 2 | Rhbdf1   |
| 3.17705658797437e-08 | 0.784018156561819  | 0.00043878328536514  | 2 | Lpin3    |
| 3.30930203390021e-08 | 0.398324378865632  | 0.000457047703901957 | 2 | Abi3bp   |
| 3.3916527703667e-08  | 0.280386813497201  | 0.000468421164115345 | 2 | Mycbp2   |
| 3.55111420531037e-08 | 0.416499428262273  | 0.000490444382895415 | 2 | Al507597 |
| 3.65969273409913e-08 | 0.287660492446816  | 0.000505440163506431 | 2 | Igfbp6   |
| 3.70383823317981e-08 | -0.355971581107926 | 0.000511537098384463 | 2 | Rpl18a   |
| 3.74100025093247e-08 | 0.498434942964715  | 0.000516669544656283 | 2 | B4galt1  |
| 4.07420924545628e-08 | 0.699961630196051  | 0.000562689038889967 | 2 | Cd55     |
| 4.09784533116565e-08 | 0.605049395672021  | 0.000565953418687288 | 2 | Jade1    |
| 4.17673717807325e-08 | -0.412685401075206 | 0.000576849171663696 | 2 | S100a11  |
| 4.26443847685045e-08 | 0.78029184         | 0.000588961598037816 | 2 | Trib1    |
| 4.68692444638419e-08 | 0.588555034826504  | 0.00064731113529012  | 2 | Rbbp6    |
| 4.74636095628032e-08 | -0.343583803594784 | 0.000655519911671875 | 2 | Rps15a   |
| 4.86390179783711e-08 | 0.635741337483905  | 0.000671753477299283 | 2 | Gm20199  |
| 4.96469003865231e-08 | 0.770282086105315  | 0.00068567334123827  | 2 | Cul7     |
| 5.45951720826393e-08 | -0.932430546912166 | 0.000754013921633331 | 2 | Rpl36a1  |
| 5.47919670750536e-08 | 1.109541828        | 0.000756731857273566 | 2 | Bmper    |
| 5.50900051630788e-08 | 0.417698632949075  | 0.000760848061307282 | 2 | Pcolce   |
| 5.63535253422301e-08 | 0.387578976543142  | 0.00077829853850154  | 2 | Specc1l  |
| 5.97154380877016e-08 | 1.166653189        | 0.000824729915429247 | 2 | Tbx20    |
| 6.28521635969488e-08 | 0.449519920919268  | 0.000868051231437459 | 2 | Lztr1    |
| 7.27417171172743e-08 | 0.402391946926106  | 0.00100463585510668  | 2 | Hk2      |
| 7.46780821049495e-08 | 0.442031696432567  | 0.00103137899195146  | 2 | Socs2    |
| 8.14107275149132e-08 | 0.372240042661539  | 0.00112436355770847  | 2 | Lrp1     |
| 8.14271529242893e-08 | 1.122845438        | 0.00112459040903736  | 2 | Map3k4   |
| 8.28351648079229e-08 | 0.828504790152377  | 0.00114403646116222  | 2 | Ccl19    |
| 8.65551549863795e-08 | 0.301235611        | 0.00119541324551689  | 2 | Tspan4   |
| 8.84224410361598e-08 | 0.595874184        | 0.0012212023331504   | 2 | Tcf21    |
| 8.89504198027251e-08 | 0.540244690431145  | 0.00122849424789544  | 2 | Fech     |
| 9.12960630895415e-08 | 0.273988478459543  | 0.00126088992732966  | 2 | Gorasp2  |
| 9.4864828856899e-08  | 0.398598056398099  | 0.00131017815134263  | 2 | Fnip1    |
| 9.58325935750605e-08 | -0.537105857422408 | 0.00132354394986516  | 2 | Psme2    |
| 1.00824463302123e-07 | 1.707885545        | 0.00139248666266562  | 2 | Saa3     |
| 1.04842701727194e-07 | -0.505247515996046 | 0.00144798255355427  | 2 | Gng5     |
| 1.05319423266489e-07 | 0.724553047879833  | 0.00145456655473348  | 2 | Asap3    |
| 1.1198960528197e-07  | -0.657002985097349 | 0.00154668843854928  | 2 | Psenen   |
| 1.13501961783652e-07 | 0.674705070459683  | 0.00156757559419401  | 2 | Cdk14    |
| 1.16591912086288e-07 | -0.728512386780966 | 0.00161025089782372  | 2 | Atp5j2   |
| 1.26472994224231e-07 | 0.476058068131966  | 0.00174671852323086  | 2 | Nfkb1a   |
| 1.2778326536593e-07  | 0.395349042        | 0.00176481467796886  | 2 | Cdc42ep1 |
| 1.29839006422408e-07 | -0.899849993001341 | 0.00179320651769987  | 2 | Atp5l    |
| 1.31065701783472e-07 | 0.323694258830219  | 0.00181014840733154  | 2 | Ccl11    |
| 1.37158719331926e-07 | 0.382603657179634  | 0.00189429907269323  | 2 | Entpd2   |
| 1.47834449629854e-07 | -0.463069217120479 | 0.00204174158383792  | 2 | Ndufb4   |
| 1.52039953259E-07    | 0.310651543418239  | 0.00209982379446005  | 2 | Lsp1     |
| 1.87113001526503e-07 | -0.865510772892046 | 0.00258421766408253  | 2 | Ndufa4   |
| 1.95680196998984e-07 | 0.457064693126552  | 0.00270253920075296  | 2 | Pak1ip1  |
| 1.96604343361999e-07 | -0.547062066429053 | 0.00271530258617257  | 2 | Rpl35    |
| 2.12243240684533e-07 | 0.370207832595042  | 0.00293129139709409  | 2 | Ecm1     |
| 2.30583842770511e-07 | 0.445653265125827  | 0.00318459345250353  | 2 | Slfn8    |
| 2.43316689659473e-07 | -0.442752805103813 | 0.00336044680088698  | 2 | Rpl18    |
| 2.64878406490191e-07 | 0.504040259604956  | 0.00365823567203603  | 2 | Mpp5     |
| 2.70362416582765e-07 | 0.873617390445324  | 0.00373397533542456  | 2 | Nrip1    |
| 2.77568482160073e-07 | 0.368895876968258  | 0.00383349830711277  | 2 | Zdhhc5   |
| 2.7909907108936e-07  | 0.395710945885978  | 0.00385463727081515  | 2 | Adamts10 |

|                      |                    |                     |   |             |
|----------------------|--------------------|---------------------|---|-------------|
| 2.87552200416643e-07 | 0.486319575406282  | 0.00397138343995426 | 2 | Sqle        |
| 2.99039420062953e-07 | 0.416241807758622  | 0.00413003343048944 | 2 | Rin2        |
| 3.07384079384932e-07 | 0.654293084322285  | 0.0042452815203853  | 2 | Epb4.1i5    |
| 3.10621016573993e-07 | 0.340902596858736  | 0.00428998685990341 | 2 | Slc5a3      |
| 3.12163344532633e-07 | -0.393305872413869 | 0.00431128795134019 | 2 | Rplp2       |
| 3.15972438275908e-07 | 0.365615040942957  | 0.00436389534502856 | 2 | Ankhd1      |
| 3.40585174226011e-07 | 0.362012753738039  | 0.00470382184123544 | 2 | Fxyd6       |
| 3.55748976888222e-07 | 0.364509416022932  | 0.00491324911980323 | 2 | Brwd1       |
| 3.59188905864196e-07 | 0.808049860752433  | 0.00496075797889042 | 2 | Hhip        |
| 3.60187502776882e-07 | 0.401430170846787  | 0.00497454960085152 | 2 | Mbd3        |
| 3.66809342227321e-07 | 0.259166987        | 0.00506600382550154 | 2 | Ube2j1      |
| 3.83946585374495e-07 | -0.355446479785553 | 0.00530268629060716 | 2 | Rpl7        |
| 3.91382275503797e-07 | 0.491662535938844  | 0.00540538060698294 | 2 | Lrig1       |
| 4.04893688203025e-07 | 0.491909258        | 0.00559198672777197 | 2 | Sntb2       |
| 4.08940760505384e-07 | -0.303151833524028 | 0.00564788084333986 | 2 | Cox4i1      |
| 4.1740993071777e-07  | 0.264634218544101  | 0.00576484855314312 | 2 | Sfrp1       |
| 4.18743400518084e-07 | 0.620507290571747  | 0.00578326510455526 | 2 | Fdft1       |
| 4.27524204279366e-07 | 0.323131430711069  | 0.00590453678530233 | 2 | Ptprd       |
| 4.28249611718932e-07 | 0.361393720389014  | 0.00591455538745017 | 2 | Gas6        |
| 4.33346638329579e-07 | 0.391795699513809  | 0.00598495042196982 | 2 | Haus7       |
| 4.69137954805108e-07 | 0.366056314760516  | 0.00647926429381335 | 2 | Vps26b      |
| 4.78211110838645e-07 | 1.373730233        | 0.00660457365179252 | 2 | Kifc3       |
| 4.7964310647332e-07  | 0.381440294370052  | 0.00662435094350302 | 2 | Pdgfra      |
| 4.84130801914518e-07 | 0.261832112898756  | 0.0066863305052414  | 2 | Lbp         |
| 4.93875153295467e-07 | 0.282291862451555  | 0.00682090974216369 | 2 | Ppic        |
| 5.00846119119935e-07 | 0.360047372338999  | 0.00691718575116542 | 2 | Csnk1d      |
| 5.13494183395817e-07 | 0.343513402442918  | 0.00709186816687963 | 2 | Hivep2      |
| 5.41010102705185e-07 | 0.578542228730289  | 0.00747189052846131 | 2 | Bdnf        |
| 5.58820752819657e-07 | 0.685879133466421  | 0.00771787341719228 | 2 | Cdk5rap2    |
| 5.7736542212678e-07  | 0.487692477212515  | 0.00797399384499295 | 2 | Smad5       |
| 5.83988917116274e-07 | 0.332593734500659  | 0.00806547093429285 | 2 | Mfap2       |
| 5.89987570146206e-07 | 0.423380849836124  | 0.00814831833128926 | 2 | Ubr4        |
| 5.91792734701054e-07 | -0.830719195721062 | 0.00817324945895626 | 2 | Bcam        |
| 6.07700905219391e-07 | 0.252780851764932  | 0.00839295720198501 | 2 | NP-904339.1 |
| 6.20710750192487e-07 | 1.117303827        | 0.00857263617090844 | 2 | Cyp26b1     |
| 6.26958725693315e-07 | 0.547916749503719  | 0.00865892696055037 | 2 | Aox3        |
| 6.30945096499121e-07 | -0.340188332669701 | 0.00871398272774936 | 2 | Rpl14       |
| 6.64979523694489e-07 | 0.610342588643055  | 0.00918403220174459 | 2 | Birc2       |
| 6.65070943189143e-07 | 0.656960080712271  | 0.00918529479638525 | 2 | Tsc2        |
| 7.11705838408751e-07 | 0.458301595219055  | 0.00982936933426326 | 2 | Enpp2       |
| 7.19911789541126e-07 | -0.722226910625494 | 0.00994270172535249 | 2 | Ywhah       |
| 7.21684038852626e-07 | 0.353519371739923  | 0.00996717826059362 | 2 | Cars        |
| 7.3139625452319e-07  | -0.567411739690735 | 0.0101013136712198  | 2 | Gm6548      |
| 7.57887805123059e-07 | 0.345565453        | 0.0104671884765546  | 2 | Serping1    |
| 7.67393303910284e-07 | 0.353025422606639  | 0.0105984689203049  | 2 | Arid1b      |
| 7.73558354746686e-07 | 0.533513012571896  | 0.0106836144374065  | 2 | Adamts15    |
| 7.76183978908497e-07 | 0.552700153639413  | 0.0107198769327053  | 2 | Ehmt2       |
| 7.77635583764921e-07 | 0.531408264952155  | 0.0107399250473773  | 2 | Trip12      |
| 7.82329909794444e-07 | 0.659266451589342  | 0.0108047583841711  | 2 | Ptgfr       |
| 7.94386865706566e-07 | 0.421894643644625  | 0.0109712770022734  | 2 | Fgl2        |
| 7.99510830965288e-07 | 0.254418459        | 0.0110420440864616  | 2 | Abca1       |
| 8.19135789579866e-07 | 0.277585719957946  | 0.0113130843898875  | 2 | Jmjd1c      |
| 8.60206715467597e-07 | 0.368045731014714  | 0.011880314947323   | 2 | Nnmt        |
| 8.64335195603004e-07 | 0.342788617333346  | 0.0119373333864731  | 2 | Fcgrt       |
| 8.6995969579295e-07  | -0.292566970990324 | 0.0120150133585964  | 2 | Rpl6        |
| 8.81735465741657e-07 | 0.365256008275676  | 0.012177648517358   | 2 | Figf        |

|                      |                    |                    |   |            |
|----------------------|--------------------|--------------------|---|------------|
| 9.04594222277562e-07 | 0.325777750839529  | 0.0124933508038754 | 2 | Por        |
| 9.20648252556574e-07 | 0.482586024998333  | 0.0127150730160588 | 2 | Angpt1     |
| 9.27387342313348e-07 | 0.876586604407865  | 0.0128081465846896 | 2 | S100b      |
| 9.66121036778799e-07 | -0.546532170296938 | 0.013343097638952  | 2 | Rpl29      |
| 1.00232604065865e-06 | -0.711305740844419 | 0.0138431249475366 | 2 | Eif4a1     |
| 1.06667922553626e-06 | -0.257177827135689 | 0.0147319067838813 | 2 | Gm13826    |
| 1.08735164009889e-06 | 0.318211672638264  | 0.0150174135014057 | 2 | Pde4b      |
| 1.11852300479755e-06 | 0.252613206431476  | 0.015447921219259  | 2 | Tmem205    |
| 1.12057848569095e-06 | -0.541427172573548 | 0.0154763094658777 | 2 | Rps25      |
| 1.20572774829713e-06 | 0.855995255270582  | 0.0166523059317317 | 2 | Senp1      |
| 1.21309054335625e-06 | 0.266027548        | 0.0167539934942931 | 2 | C1s1       |
| 1.26440154835872e-06 | 0.337648786646939  | 0.0174626497843822 | 2 | Phip       |
| 1.31702208743702e-06 | 0.406418228072561  | 0.0181893920495927 | 2 | Vipr2      |
| 1.3518088523155e-06  | 0.636249081702594  | 0.0186698320593294 | 2 | Negr1      |
| 1.39258818738601e-06 | 0.407731773033682  | 0.0192330354559882 | 2 | Clmp       |
| 1.48214934110546e-06 | 0.408620379620449  | 0.0204699645500075 | 2 | Sil1       |
| 1.48871420622751e-06 | -0.411448595357998 | 0.0205606319022081 | 2 | Pcnp       |
| 1.54462403579109e-06 | 0.450304478065315  | 0.0213328025583107 | 2 | Ptp4a1     |
| 1.5737796297285e-06  | 0.321735332255428  | 0.0217354704661803 | 2 | Pxdn       |
| 1.74564517484555e-06 | 0.984661555350068  | 0.0241091055097919 | 2 | Pdxk       |
| 1.78772423830281e-06 | 0.370857898902195  | 0.0246902594552001 | 2 | Erlec1     |
| 1.79521257488363e-06 | -0.403329859812628 | 0.0247936808717178 | 2 | Gstp1      |
| 1.81639592440682e-06 | -0.296130017225424 | 0.0250862441119826 | 2 | Rpl13      |
| 1.82195697715493e-06 | 0.423976408565633  | 0.0251630478114868 | 2 | Ier3       |
| 1.82471334793057e-06 | 0.361538510770808  | 0.0252011160482692 | 2 | Smc4       |
| 1.85871380838848e-06 | 0.275114666070625  | 0.0256706964076533 | 2 | Sepn1      |
| 1.86365154190299e-06 | 0.437663158        | 0.0257388914452222 | 2 | Ntrk2      |
| 1.88362928314792e-06 | 0.342093083086779  | 0.026014804029556  | 2 | Cdk5rap3   |
| 1.89283733793795e-06 | 0.423307012243818  | 0.026141976474261  | 2 | Hook3      |
| 1.89708918806219e-06 | 0.848475050599147  | 0.026200698776327  | 2 | 3632451O06 |
| 2.0095295011042e-06  | 0.314272115434109  | 0.0277536119397501 | 2 | Ift27      |
| 2.02797259996676e-06 | 0.496376385388383  | 0.028008329578141  | 2 | Pi16       |
| 2.06326204712922e-06 | -0.338705178382525 | 0.0284957121329016 | 2 | Eif5a      |
| 2.07247041415443e-06 | 0.354378883843618  | 0.0286228888898869 | 2 | Crem       |
| 2.07373603049177e-06 | 0.602405287412703  | 0.0286403683171218 | 2 | Csmp1      |
| 2.13441217779557e-06 | 1.188695011        | 0.0294783665875346 | 2 | Dusp8      |
| 2.19098823969221e-06 | 0.444611104363114  | 0.0302597385783891 | 2 | Sin3b      |
| 2.22347130983406e-06 | 0.466947504011389  | 0.0307083622601181 | 2 | Srgap2     |
| 2.23475229337589e-06 | -0.585142833983993 | 0.0308641639238145 | 2 | Tma7       |
| 2.25731541706391e-06 | -1.331785353       | 0.0311757832250697 | 2 | Spint2     |
| 2.27931376047347e-06 | 0.702036127977191  | 0.0314796023458991 | 2 | Sphk1      |
| 2.28720000780947e-06 | 0.582243572871441  | 0.0315885193078566 | 2 | Jkamp      |
| 2.30545294465303e-06 | 0.491083511032602  | 0.0318406106186031 | 2 | Zfc3h1     |
| 2.31224015356961e-06 | 0.462205367154558  | 0.0319343487609498 | 2 | Gna13      |
| 2.31893057805284e-06 | 0.331451485368131  | 0.0320267502134878 | 2 | Dnajc25    |
| 2.34976760249373e-06 | 0.341898323305894  | 0.0324526403580409 | 2 | Adm        |
| 2.36072490234351e-06 | 0.26739186         | 0.0326039716262663 | 2 | Gba        |
| 2.37756392116482e-06 | 0.677814678646269  | 0.0328365353152074 | 2 | Sp1        |
| 2.38550905956757e-06 | 0.337049696019786  | 0.0329462656216876 | 2 | Stau1      |
| 2.68443902019431e-06 | 0.255296809483363  | 0.0370747873079036 | 2 | Pagr1a     |
| 2.7086416817102e-06  | 0.270502127898727  | 0.0374090502660996 | 2 | Pofut1     |
| 2.71420169178488e-06 | -1.095299021       | 0.037485839565241  | 2 | Gpsm2      |
| 2.76450910379131e-06 | -0.397637168748013 | 0.0381806352324618 | 2 | Atp5h      |
| 2.7736992234144e-06  | 0.451828084411323  | 0.0383075599745762 | 2 | Ddx46      |
| 2.8097858235282e-06  | 0.543733375        | 0.038805952008748  | 2 | Prickle1   |
| 2.8128658837721e-06  | 0.397017740523605  | 0.0388484907207765 | 2 | Cln4-2     |

|                      |                    |                    |   |          |
|----------------------|--------------------|--------------------|---|----------|
| 2.82055536765923e-06 | 0.291815231854187  | 0.0389546901827416 | 2 | Herc1    |
| 2.8416696026682e-06  | -0.318281814       | 0.0392462988824505 | 2 | Tceb2    |
| 2.84230059349294e-06 | 0.913674442807482  | 0.039255013496731  | 2 | Col27a1  |
| 2.88477619390696e-06 | 0.681620943234599  | 0.039841644014049  | 2 | Ccbe1    |
| 2.95176844659899e-06 | -0.413715548911996 | 0.0407668740159786 | 2 | Ptms     |
| 3.08380511093437e-06 | 0.280024175596967  | 0.0425904323871146 | 2 | Ythdc1   |
| 3.20894950838703e-06 | 0.587547059975725  | 0.0443188016603332 | 2 | Papola   |
| 3.25056881991403e-06 | 0.605592705336387  | 0.0448936059718327 | 2 | Gm16515  |
| 3.35705183776403e-06 | 0.488215312079287  | 0.046364242931359  | 2 | Slc39a14 |
| 3.44925251436569e-06 | 0.269378483495638  | 0.0476376264759046 | 2 | Tmem204  |
| 3.66671807269495e-06 | -1.18097917        | 0.0506410433019899 | 2 | Gja5     |
| 3.70274955049037e-06 | -0.333397259069387 | 0.0511386740418225 | 2 | Pebp1    |
| 3.7115332985268e-06  | 0.453826997036192  | 0.0512599863859537 | 2 | Piezo2   |
| 3.72337275397151e-06 | -0.331580584662721 | 0.0514235011051005 | 2 | Naca     |
| 3.80583200900993e-06 | -0.936317832553292 | 0.0525623458764362 | 2 | Usmg5    |
| 3.82428607278326e-06 | 0.590460725134414  | 0.0528172149512096 | 2 | Loxl2    |
| 3.86598335023549e-06 | 0.304678088053048  | 0.0533930960501024 | 2 | Aprt     |
| 3.96683197796653e-06 | 0.492332097147749  | 0.0547859164476958 | 2 | Mpz11    |
| 4.03004942339295e-06 | -0.491726541277919 | 0.055659013        | 2 | Rpl22    |
| 4.04661990907557e-06 | 0.644162365847463  | 0.0558878675642427 | 2 | Abhd11os |
| 4.07069001597115e-06 | 0.267892176473948  | 0.0562202998105775 | 2 | Kcnj8    |
| 4.08828855717219e-06 | 0.477674157        | 0.0564633532631051 | 2 | Epn1     |
| 4.11886507924203e-06 | 0.715247702256276  | 0.0568856456094117 | 2 | Pja1     |
| 4.29790554109483e-06 | -0.760105290197194 | 0.0593583734280607 | 2 | Pabpc4   |
| 4.3368112001277e-06  | 0.574734033100884  | 0.0598956994849637 | 2 | Pgrmc2   |
| 4.40692914252565e-06 | 0.269680619935767  | 0.0608640983874217 | 2 | Ccnl2    |
| 4.44827031242053e-06 | 0.271868366059451  | 0.0614350612848399 | 2 | Cdyl     |
| 4.47043405078556e-06 | 0.310620716802537  | 0.0617411646753994 | 2 | Sash1    |
| 4.54445485596578e-06 | 0.769247771        | 0.0627634660157435 | 2 | Ptpn23   |
| 4.57716569903586e-06 | 0.473733079237167  | 0.0632152354693842 | 2 | Zfp386   |
| 4.59845519503472e-06 | -0.643471668833789 | 0.0635092646986246 | 2 | Uqcrb    |
| 4.81995875207311e-06 | -0.309253856953394 | 0.0665684503248817 | 2 | S100a6   |
| 5.39270709337151e-06 | 0.713603989087649  | 0.0744786776665539 | 2 | Maob     |
| 5.63981772427046e-06 | -0.600584881163773 | 0.0778915225898993 | 2 | Tomm6    |
| 5.85861396403332e-06 | 0.540840649491848  | 0.0809133174572642 | 2 | Sdc2     |
| 5.89139537229924e-06 | -0.302858852255421 | 0.0813660614868248 | 2 | Eif1     |
| 5.94125992244014e-06 | 0.825444555713009  | 0.0820547407888208 | 2 | S1pr2    |
| 6.04211606852807e-06 | 0.300919062856178  | 0.0834476650224412 | 2 | Litaf    |
| 6.10067953600942e-06 | 0.328345429774304  | 0.0842564850718261 | 2 | Ankrd11  |
| 6.16032187264358e-06 | 0.310514223787359  | 0.0850802053830805 | 2 | Pdcd11   |
| 6.4626709133836e-06  | 0.645040220498869  | 0.0892559479847409 | 2 | Cnst     |
| 6.56535499838797e-06 | 0.327249306        | 0.0906741178827362 | 2 | Ptk2     |
| 6.57293835397115e-06 | 0.283462507863904  | 0.0907788516066955 | 2 | Kdelr3   |
| 6.99152333212367e-06 | -0.909949556535708 | 0.096559929        | 2 | Psmb3    |
| 7.28536124609878e-06 | 0.344205356201887  | 0.100618124        | 2 | Heph     |
| 7.29755857396192e-06 | -1.388277038       | 0.100786581464988  | 2 | Nos3     |
| 7.44323868808415e-06 | -0.447721715582568 | 0.10279857         | 2 | Snrpd2   |
| 7.44785344912383e-06 | 0.440086820172926  | 0.102862303985849  | 2 | Tmem260  |
| 7.51102046275999e-06 | 0.307059127181823  | 0.103734703611178  | 2 | Nrd1     |
| 7.68018135262425e-06 | 0.250137852761672  | 0.106070984661093  | 2 | Gfpt2    |
| 7.70930136081052e-06 | 0.315914781150674  | 0.106473161094154  | 2 | Grina    |
| 7.71233387625161e-06 | 0.640166092152125  | 0.106515043164911  | 2 | Abhd5    |
| 7.85636124295511e-06 | 0.446315092085169  | 0.108504205126453  | 2 | Rftn1    |
| 8.17315115193469e-06 | 0.395969131640083  | 0.112879391        | 2 | Itgbl1   |
| 8.23588111188327e-06 | 0.353678524826319  | 0.113745754        | 2 | Pltp     |
| 8.48731839148203e-06 | 0.420691877313459  | 0.117218354304758  | 2 | Fundc1   |



|                      |                    |                   |   |           |
|----------------------|--------------------|-------------------|---|-----------|
| 9.05968908236551e-06 | -0.479988054088705 | 0.125123366       | 2 | Ost4      |
| 9.07267287751788e-06 | 0.473642812511006  | 0.125302685111399 | 2 | Pnn       |
| 9.08039326213997e-06 | 0.298328238195774  | 0.125409311343415 | 2 | Fmo1      |
| 9.2877198934606e-06  | 0.509948366600293  | 0.128272699448584 | 2 | Ahsg      |
| 9.91669385971244e-06 | 0.346423225026859  | 0.136959458896489 | 2 | Lpar1     |
| 1.00884690964362e-05 | 0.615171131724118  | 0.139331847       | 2 | Nid2      |
| 1.02726017075211e-05 | 0.444211260033853  | 0.141874902182573 | 2 | Thbs2     |
| 1.05155245907062e-05 | 0.338221129904982  | 0.145229910122243 | 2 | Alcam     |
| 1.08054255589378e-05 | 0.714499937019706  | 0.149233732394491 | 2 | Rgs10     |
| 1.10407314509099e-05 | 1.307479226        | 0.152483542068517 | 2 | Dcaf17    |
| 1.10835800400223e-05 | -0.297436492943333 | 0.153075323932748 | 2 | Nme2      |
| 1.12731788347464e-05 | -1.034262735       | 0.155693872886682 | 2 | Txnip     |
| 1.13174701411903e-05 | -0.484443952959054 | 0.15630558        | 2 | Psma5     |
| 1.18216489754793e-05 | 0.264076171422276  | 0.163268794000345 | 2 | Smpd1     |
| 1.18587119502809e-05 | 0.406450475129192  | 0.163780671       | 2 | Kmt2e     |
| 1.23836254514388e-05 | 0.579561785968018  | 0.171030251109821 | 2 | Grpel2    |
| 1.2408933024639e-05  | 0.549408268348367  | 0.171379774003289 | 2 | Tgfbrap1  |
| 1.25033780338064e-05 | 0.717766247253493  | 0.172684154024901 | 2 | G6pdx     |
| 1.25723155066583e-05 | 0.479900066        | 0.173636249462458 | 2 | Wwp2      |
| 1.27466868929994e-05 | 1.165361845        | 0.176044492679214 | 2 | Naa25     |
| 1.2846516300933e-05  | 0.286772531707123  | 0.177423236632186 | 2 | Tubb6     |
| 1.30840056210099e-05 | -0.359942643565192 | 0.180703201631768 | 2 | Rpl13a    |
| 1.31219942917408e-05 | -0.327864741499661 | 0.181227863163232 | 2 | Gas5      |
| 1.32813763192555e-05 | 0.314743300775778  | 0.183429088345238 | 2 | Fn1       |
| 1.3500732245282e-05  | 0.568725648889172  | 0.186458613039589 | 2 | Fmn12     |
| 1.36325767941929e-05 | 0.284783318231641  | 0.188279518104599 | 2 | Kmt2c     |
| 1.38689801229245e-05 | 0.282065940062287  | 0.191544484       | 2 | Man2b1    |
| 1.38730665064203e-05 | -0.405887594       | 0.191600921520171 | 2 | Dstn      |
| 1.38941001089685e-05 | 0.496297907654507  | 0.191891416604964 | 2 | Trim2     |
| 1.47480764856665e-05 | 0.610673801045547  | 0.203685684       | 2 | Sele      |
| 1.48263031524199e-05 | 0.508308919318718  | 0.204766072838071 | 2 | Man2a2    |
| 1.5143859701216e-05  | 0.513005819        | 0.209151846333494 | 2 | Ptcd2     |
| 1.59216882138281e-05 | 0.251466466594854  | 0.219894436       | 2 | Chrdl1    |
| 1.61244202392479e-05 | -0.560480408387677 | 0.222694367924253 | 2 | Mpv17l2   |
| 1.64474474357773e-05 | 0.501511813251597  | 0.227155697       | 2 | Idnk      |
| 1.66734992012794e-05 | -0.393844819223635 | 0.230277697       | 2 | Arf1      |
| 1.68842337213979e-05 | 0.306226562745246  | 0.233188151926227 | 2 | Muc13     |
| 1.78761671830417e-05 | 0.331119910541744  | 0.246887744964989 | 2 | Ccm4l     |
| 1.80308772898237e-05 | 0.717308995355737  | 0.249024446249755 | 2 | Rasa1     |
| 1.80976401787807e-05 | -0.260142359450124 | 0.249946509       | 2 | Aldoat1   |
| 1.83450057211719e-05 | 0.536502085582755  | 0.253362874015106 | 2 | Polr2e    |
| 1.8391936463783e-05  | 0.315571390920027  | 0.254011034501307 | 2 | Elmod2    |
| 1.93461177320847e-05 | 0.794787217432325  | 0.267189231997822 | 2 | D10Jhu81e |
| 1.93688740652875e-05 | 0.440083861741841  | 0.267503519715686 | 2 | Smarcd2   |
| 1.94831127506723e-05 | 0.508082317560783  | 0.269081270199536 | 2 | Dctn3     |
| 1.96111924726171e-05 | 0.330241686870577  | 0.270850179239315 | 2 | Eif2ak4   |
| 1.96700585086235e-05 | 0.290373981621218  | 0.271663178062599 | 2 | Egr1      |
| 1.97386878249995e-05 | 1.123757388        | 0.272611017551067 | 2 | Pappa     |
| 1.97648677547123e-05 | 0.298135495        | 0.272972588560332 | 2 | Secisbp2l |
| 2.00424932126144e-05 | 0.295576219877423  | 0.276806873759417 | 2 | Arl5b     |
| 2.16596715057182e-05 | 0.437037449038595  | 0.299141723165475 | 2 | Rif1      |
| 2.16805812540766e-05 | 0.385096357750999  | 0.299430507700051 | 2 | Jak1      |
| 2.17052016859934e-05 | 0.380393510363251  | 0.299770540485255 | 2 | Bhlhe40   |
| 2.17320457550509e-05 | 0.286039611090994  | 0.300141283923009 | 2 | Fxyd5     |
| 2.19091660771855e-05 | 0.465021976800678  | 0.302587492692009 | 2 | Bclaf1    |
| 2.23320133241255e-05 | 0.878334979055095  | 0.308427436019498 | 2 | Kctd17    |



|                      |                    |                   |   |             |
|----------------------|--------------------|-------------------|---|-------------|
| 2.23340484833996e-05 | 0.616990968441104  | 0.308455543604232 | 2 | Cdon        |
| 2.28050422343756e-05 | 0.258133781        | 0.314960438298961 | 2 | Prpf40a     |
| 2.30688451025525e-05 | 0.489844885        | 0.318603819711353 | 2 | Sobp        |
| 2.33213777029973e-05 | -0.552687241067607 | 0.322091547456096 | 2 | 1190005I06R |
| 2.37643045328335e-05 | 0.854193942884663  | 0.328208809902964 | 2 | Ctr9        |
| 2.4410119411701e-05  | 0.556329765743247  | 0.337128159195002 | 2 | Tom1l2      |
| 2.44898010054293e-05 | 0.591402458525056  | 0.338228641685984 | 2 | Lsamp       |
| 2.48581401144287e-05 | -0.262251683719964 | 0.343315773120374 | 2 | Scamp2      |
| 2.63050166444128e-05 | 0.311585050447644  | 0.363298584875985 | 2 | Yars        |
| 2.63736592044495e-05 | 0.428585770130363  | 0.364246607272653 | 2 | Slk         |
| 2.66797781935733e-05 | 0.829145054184347  | 0.368474417       | 2 | Npy1r       |
| 2.67889793660996e-05 | 0.280290134        | 0.369982594025202 | 2 | Smurf2      |
| 2.67955328054222e-05 | 0.406521089044703  | 0.370073103575685 | 2 | Sqstm1      |
| 2.73822214586376e-05 | 0.453793542607963  | 0.378175860565243 | 2 | Gm15417     |
| 2.88033493833732e-05 | 0.811614628591891  | 0.397803058333767 | 2 | Ift22       |
| 2.94106304676868e-05 | 0.419999195571421  | 0.406190217389223 | 2 | Traf3ip2    |
| 3.05759437401988e-05 | -0.477352033713578 | 0.422284358995886 | 2 | Atp5j       |
| 3.0746081285365e-05  | -0.377951410853213 | 0.424634128632176 | 2 | Rpl10       |
| 3.21732207198654e-05 | -0.318541828032334 | 0.444344351362061 | 2 | Serinc3     |
| 3.22829437332914e-05 | -1.080091101       | 0.445859735900487 | 2 | Snrpf       |
| 3.31969393830367e-05 | 0.377011138051328  | 0.45848293        | 2 | Atp6v1b2    |
| 3.34429954642466e-05 | -0.274589412640801 | 0.461881210356709 | 2 | Sec61g      |
| 3.42646701405376e-05 | 0.511077813918702  | 0.473229359310965 | 2 | Wbp4        |
| 3.5292190824861e-05  | 0.305907647        | 0.487420447482156 | 2 | Cyp2j9      |
| 3.55484037370544e-05 | 0.413394649197576  | 0.490959004012459 | 2 | Alpl        |
| 3.5787150630852e-05  | 0.276641294195187  | 0.494256337362696 | 2 | Arfgef1     |
| 3.5958825156565e-05  | 0.687675452143305  | 0.496627334237319 | 2 | Cipc        |
| 3.6040424457005e-05  | 0.470206375566138  | 0.497754302175695 | 2 | Mpp6        |
| 3.6629528807776e-05  | 0.730509605        | 0.505890422364194 | 2 | Stk32b      |
| 3.68453072970453e-05 | 0.370061963787353  | 0.508870539079493 | 2 | Tex264      |
| 3.70086522722124e-05 | 0.338484430711217  | 0.511126496531525 | 2 | Stard3      |
| 3.72460739673416e-05 | 0.380327102407305  | 0.514405527562954 | 2 | Kidins220   |
| 3.76454088838206e-05 | 0.378360346356735  | 0.519920742094446 | 2 | Iffo2       |
| 3.78413943750569e-05 | 0.383997301516328  | 0.522627498       | 2 | Smc6        |
| 3.78766719201872e-05 | -0.835467561358209 | 0.523114715889706 | 2 | E030013I19R |
| 3.79494879010018e-05 | 0.505135814        | 0.524120377400735 | 2 | Bahd1       |
| 3.80108456909922e-05 | 0.479858294        | 0.524967789838294 | 2 | Prss12      |
| 3.82180967300216e-05 | 0.272129211944937  | 0.527830133938328 | 2 | Rbms1       |
| 3.85244922622408e-05 | -0.658345009838646 | 0.532061762633808 | 2 | Tcea1       |
| 3.87927102362639e-05 | 0.414374324905472  | 0.535766121       | 2 | Zranb2      |
| 3.88061836691856e-05 | 0.570585761847991  | 0.535952202655123 | 2 | Ivns1abp    |
| 3.89367617235098e-05 | -0.364129643986317 | 0.537755616163394 | 2 | Selk        |
| 4.07766810498749e-05 | 0.482754901128094  | 0.563166741979822 | 2 | Bin3        |
| 4.30932052000512e-05 | -0.781460561099062 | 0.595160257017907 | 2 | Khsrp       |
| 4.31859185183234e-05 | 0.625823008516753  | 0.596440720656565 | 2 | Slc25a38    |
| 4.36946969799577e-05 | -0.489373756       | 0.603467459990196 | 2 | Atp5g1      |
| 4.40886398933535e-05 | 0.601282381487486  | 0.608908205567105 | 2 | Map2k7      |
| 4.47284354557873e-05 | 0.259582086852457  | 0.617744422079878 | 2 | Sfrp4       |
| 4.59432839971989e-05 | 0.359471770267218  | 0.634522695285314 | 2 | Aco2        |
| 4.6060093733851e-05  | 0.279992154693718  | 0.636135954558216 | 2 | Ttc1        |
| 4.63097599859481e-05 | 0.936660210744255  | 0.639584095165929 | 2 | Klhl17      |
| 4.64051347311629e-05 | 0.487346578595267  | 0.640901315772091 | 2 | Sertad4     |
| 4.76889675810893e-05 | 0.828516998087077  | 0.658632331262425 | 2 | Arhgef5     |
| 4.80523676491087e-05 | 0.411957376285496  | 0.66365125        | 2 | Pcdh18      |
| 4.87051315796162e-05 | 0.288891759774193  | 0.672666572       | 2 | Tnrc6a      |
| 4.87227475032779e-05 | -0.471875526489013 | 0.672909865767772 | 2 | Polr2l      |

|                      |                    |                   |   |             |
|----------------------|--------------------|-------------------|---|-------------|
| 4.87885697334691e-05 | 0.285394538848387  | 0.673818936588942 | 2 | Zbtb20      |
| 5.06793430433861e-05 | 0.305834826180871  | 0.699932406772206 | 2 | Cc2d2a      |
| 5.1500645410461e-05  | -0.430795122304195 | 0.711275413763877 | 2 | Ybx1        |
| 5.16542909264549e-05 | 0.404285231773065  | 0.713397411985269 | 2 | Phlda1      |
| 5.18163556512561e-05 | -0.325566066339813 | 0.715635687899498 | 2 | Apoa1bp     |
| 5.19114846441087e-05 | -0.720032836926867 | 0.716949514419785 | 2 | Camta1      |
| 5.27922884124846e-05 | -0.824959583759794 | 0.729114295264824 | 2 | Pdcd5       |
| 5.43974242611228e-05 | -0.357204255865882 | 0.751282826470367 | 2 | Sat1        |
| 5.58494991684465e-05 | 0.547939726652945  | 0.771337433015414 | 2 | Lcorl       |
| 5.69487449060123e-05 | 1.027212283        | 0.786519115896935 | 2 | Ttbk2       |
| 5.77254819641306e-05 | 0.407961549340701  | 0.797246631406608 | 2 | Tmem140     |
| 5.7750126193593e-05  | -0.446909253386541 | 0.797586992859713 | 2 | Dynlrb1     |
| 5.79636162550606e-05 | 1.227522561        | 0.800535504098642 | 2 | Bag4        |
| 5.85033873602621e-05 | -0.527508459535316 | 0.807990283       | 2 | H2-K1       |
| 5.91455525211292e-05 | 0.470162383146744  | 0.816859225869316 | 2 | Fam214b     |
| 5.9509929379813e-05  | -0.561159756239891 | 0.821891634664598 | 2 | Rpl38       |
| 6.09086493694066e-05 | 0.465838106818478  | 0.841209356440875 | 2 | Rspo3       |
| 6.2877557929564e-05  | 0.472081246964777  | 0.868401952565208 | 2 | Taf3        |
| 6.33243107772438e-05 | 0.376055381537173  | 0.874572056144514 | 2 | Fam21       |
| 6.51066704495927e-05 | -0.369820591608169 | 0.899188225579325 | 2 | Uqcr11      |
| 7.05395542885284e-05 | 0.445731373344804  | 0.974221784278865 | 2 | Rps4l       |
| 7.08154256504962e-05 | 0.426596206        | 0.978031843659004 | 2 | Ets2        |
| 7.31428598585082e-05 | 0.388533230853656  | 1                 | 2 | Prdm2       |
| 7.37102477504276e-05 | 0.371521926727479  | 1                 | 2 | Prrx1       |
| 7.4819244044514e-05  | 0.253749874896082  | 1                 | 2 | Rela        |
| 7.57030635162398e-05 | 0.275179464385891  | 1                 | 2 | Rab3d       |
| 7.72860323424123e-05 | 0.537122504372839  | 1                 | 2 | Cxcl5       |
| 7.81171497946002e-05 | 0.285496243192567  | 1                 | 2 | Il6st       |
| 7.820568881559E-05   | 0.696453666389226  | 1                 | 2 | Gas7        |
| 7.8494308063374e-05  | 0.505488994        | 1                 | 2 | Myoc        |
| 7.97276905684759e-05 | 0.289561015428406  | 1                 | 2 | Gstm5       |
| 8.21854174967423e-05 | -0.777311177552251 | 1                 | 2 | Perp        |
| 8.28975639986744e-05 | 0.576698796850122  | 1                 | 2 | Kdm7a       |
| 8.42299705699892e-05 | 0.316657778435764  | 1                 | 2 | Lrrc28      |
| 8.78918493330226e-05 | -0.394376978763404 | 1                 | 2 | Npm1        |
| 8.87156153330886e-05 | 0.273100661924211  | 1                 | 2 | Rnase4      |
| 9.00239033220301e-05 | 0.324556124150094  | 1                 | 2 | Ppfibp1     |
| 9.01363667688707e-05 | -0.466266214       | 1                 | 2 | Skp1a       |
| 9.07509757546479e-05 | 0.548147394201022  | 1                 | 2 | Slit2       |
| 9.14021145687309e-05 | 0.664116743193468  | 1                 | 2 | Nfasc       |
| 9.19560629607086e-05 | -0.953637668821244 | 1                 | 2 | Rps29       |
| 9.20328416696106e-05 | 0.323182057076748  | 1                 | 2 | Rora        |
| 9.24060412182084e-05 | 0.480887662060118  | 1                 | 2 | Suv420h1    |
| 9.25370426998053e-05 | 0.258401349175713  | 1                 | 2 | B9d1        |
| 9.28215743568962e-05 | 0.281905900853726  | 1                 | 2 | Malsu1      |
| 9.46281482858143e-05 | 0.399868068170756  | 1                 | 2 | Fam129b     |
| 9.66750512342727e-05 | 0.409418683651975  | 1                 | 2 | Tardbp      |
| 9.77132875599827e-05 | -0.986625284423978 | 1                 | 2 | 4930503E24F |
| 0.000100067960200744 | 0.610438293280723  | 1                 | 2 | Cdc42ep4    |
| 0.000100571497372697 | 0.785547458231799  | 1                 | 2 | Ppp4r1      |
| 0.000100953820449452 | 1.147274557        | 1                 | 2 | Rint1       |
| 0.000101922884507369 | 0.880969562384906  | 1                 | 2 | Map3k3      |
| 0.000102094667019252 | 0.469458333520585  | 1                 | 2 | Arhgef40    |
| 0.000103135892995434 | 0.361917741438754  | 1                 | 2 | Rbbp8       |
| 0.0001031908984396   | -1.105304273       | 1                 | 2 | Tmem38b     |
| 0.000106208054828566 | 0.782979985404303  | 1                 | 2 | Cep162      |

|                      |                    |   |   |             |
|----------------------|--------------------|---|---|-------------|
| 0.000106785035943019 | -0.994694929781827 | 1 | 2 | Ppp4c       |
| 0.000109651941352726 | 0.665652540055868  | 1 | 2 | Eps8        |
| 0.000110278272221529 | 0.392317198701659  | 1 | 2 | Akap8       |
| 0.000111197341231767 | 0.290596924859306  | 1 | 2 | Fto         |
| 0.000112843850435899 | -0.866190127       | 1 | 2 | Mylk4       |
| 0.000113161800899708 | 0.896205124794573  | 1 | 2 | Gnl3l       |
| 0.00011498306476465  | 0.602913137540758  | 1 | 2 | Cherp       |
| 0.000123277758000704 | 0.559951903562362  | 1 | 2 | Gcdh        |
| 0.0001248658986693   | 0.281157158050482  | 1 | 2 | Usp33       |
| 0.000129534042082452 | 1.309876233        | 1 | 2 | Rnf8        |
| 0.0001302881506501   | 0.439214092844805  | 1 | 2 | Al607873    |
| 0.000130363587820113 | 0.390261665646648  | 1 | 2 | Tmem248     |
| 0.000131053251581053 | 0.391981606320357  | 1 | 2 | Ppp1r18     |
| 0.00013212919441347  | 0.257976449082634  | 1 | 2 | Myo10       |
| 0.000133643351193168 | 0.354898092540524  | 1 | 2 | Lonrf3      |
| 0.000134250309103    | 0.486850928092715  | 1 | 2 | Lmo4        |
| 0.00013459513104181  | 0.486596797246358  | 1 | 2 | Il6ra       |
| 0.000135384331076787 | 0.330318039        | 1 | 2 | Man1a       |
| 0.000135509988797123 | 0.255552502349489  | 1 | 2 | Pkd2        |
| 0.000135818237974451 | 0.444359103623607  | 1 | 2 | Add1        |
| 0.000136744590706199 | 0.390308655638249  | 1 | 2 | Acsl4       |
| 0.000137762766508039 | -0.288396823242529 | 1 | 2 | Crip1       |
| 0.000139499168400549 | 0.518574955543467  | 1 | 2 | Fam63b      |
| 0.000140411622363693 | -0.320828956557463 | 1 | 2 | Fkbp1a      |
| 0.00014270298317612  | 0.559483691048997  | 1 | 2 | Chordc1     |
| 0.000144229731604265 | -0.463854826639357 | 1 | 2 | Atp5k       |
| 0.000145091020125907 | 0.330903746445993  | 1 | 2 | Sdc3        |
| 0.000146215881507068 | 0.830591518333131  | 1 | 2 | Pih1d1      |
| 0.000149022372362214 | 0.533301030906386  | 1 | 2 | Trappc1     |
| 0.000149918306244653 | 0.531224855777811  | 1 | 2 | Smim3       |
| 0.000151381527879371 | 0.456966153739847  | 1 | 2 | Svep1       |
| 0.00015197783895563  | 0.275584669063003  | 1 | 2 | Tnrc6c      |
| 0.000152178663097509 | 0.338799745849355  | 1 | 2 | Tmem33      |
| 0.000161676960475235 | 0.408245474        | 1 | 2 | Coro1b      |
| 0.000162124603683906 | 0.522458048        | 1 | 2 | Cilp        |
| 0.000162953213280713 | 0.493051138        | 1 | 2 | Zmym2       |
| 0.000166117836629968 | 0.292203037640563  | 1 | 2 | Phlpp2      |
| 0.000169183813123845 | 0.425771022588353  | 1 | 2 | Setd7       |
| 0.000169420788344987 | -0.368368839911466 | 1 | 2 | Eno1b       |
| 0.000171085548356115 | 0.260984380814384  | 1 | 2 | Rabl6       |
| 0.000171878087874303 | -0.703279473572226 | 1 | 2 | Sart1       |
| 0.00017749638183514  | 0.348451710090543  | 1 | 2 | Dlgap4      |
| 0.000178854733111125 | 0.388937734        | 1 | 2 | Ndn         |
| 0.000179810494854268 | -0.743025264684817 | 1 | 2 | Ppp1r14b    |
| 0.000180136739452012 | -0.628861471963223 | 1 | 2 | Nhp2l1      |
| 0.000180359554527324 | -0.705460440793302 | 1 | 2 | U2af1       |
| 0.000182584953642472 | 0.351129178446652  | 1 | 2 | Ikbkap      |
| 0.000183216954301864 | 0.267070523        | 1 | 2 | Cpt1a       |
| 0.000188187715773822 | -0.317828598088793 | 1 | 2 | Pabpc1      |
| 0.000189209233828345 | 0.303607293041571  | 1 | 2 | Chml        |
| 0.000191542539256039 | 0.505033193763858  | 1 | 2 | Atxn7       |
| 0.00019293574449223  | -0.725053273121786 | 1 | 2 | 1810022K09I |
| 0.000193825204701133 | 0.778372273755705  | 1 | 2 | Ulk1        |
| 0.000194283684097397 | 0.542197114317092  | 1 | 2 | Itga10      |
| 0.000195583299232964 | 0.615358571449191  | 1 | 2 | Plekhh2     |
| 0.000198018957981901 | 0.717882019753142  | 1 | 2 | Gria4       |

|                      |                    |   |   |          |
|----------------------|--------------------|---|---|----------|
| 0.000202467386506959 | 0.605713263172503  | 1 | 2 | Slc11a2  |
| 0.000204965424099281 | 0.271083091372925  | 1 | 2 | Exosc10  |
| 0.000209726665390129 | -0.680602607381656 | 1 | 2 | Hoxa5    |
| 0.000210497845034432 | -0.270374808567866 | 1 | 2 | Anxa2    |
| 0.000221521370999599 | 0.250178051279826  | 1 | 2 | H6pd     |
| 0.000222454325819181 | 0.337837809285518  | 1 | 2 | Mmp19    |
| 0.000222848927642806 | 0.260611493717407  | 1 | 2 | Def8     |
| 0.000224139496003002 | 0.368009646553014  | 1 | 2 | Itgb5    |
| 0.000230207788934407 | 0.507822218037593  | 1 | 2 | Mfsd6    |
| 0.000230647881930087 | 0.291494422533023  | 1 | 2 | Fkbp1b   |
| 0.000231463427218016 | -0.605330974553029 | 1 | 2 | Sumo1    |
| 0.000233413910105849 | -0.696054982688112 | 1 | 2 | Cdk17    |
| 0.000235025339941079 | 0.290217821087872  | 1 | 2 | Cxcl10   |
| 0.000240322956033899 | 0.965199072191839  | 1 | 2 | Chl1     |
| 0.000241260122906276 | 0.303060620822102  | 1 | 2 | Ccnl1    |
| 0.000241592037055752 | 0.395672042483954  | 1 | 2 | Il1r1    |
| 0.000243383015053283 | -1.120947364       | 1 | 2 | Ivd      |
| 0.000247302197116297 | 0.861792904480911  | 1 | 2 | Art4     |
| 0.000249984092490768 | -0.341913524100879 | 1 | 2 | Hnmpk    |
| 0.000251902472974631 | 0.254916901559061  | 1 | 2 | Kdm5a    |
| 0.000256198133445451 | 0.897060081182809  | 1 | 2 | Mafb     |
| 0.000260129778161114 | 0.461887247825572  | 1 | 2 | Hsd3b7   |
| 0.000265401365775332 | 0.390562807920094  | 1 | 2 | Cdk20    |
| 0.000270236945039195 | 0.478584990824884  | 1 | 2 | Slc29a3  |
| 0.0002705517160721   | 0.344708064034436  | 1 | 2 | Txnrd1   |
| 0.000274690963906345 | 0.927989102080833  | 1 | 2 | Mthfr    |
| 0.000278015705706761 | 0.680231684585875  | 1 | 2 | Zfml     |
| 0.000278499988331053 | 0.300304223470963  | 1 | 2 | Syde1    |
| 0.000280119381998675 | 0.269326829        | 1 | 2 | Ext2     |
| 0.000287929792932461 | 0.254034091955532  | 1 | 2 | Abcb1b   |
| 0.000290095694463855 | 0.92812369         | 1 | 2 | Gpatch4  |
| 0.000292804886156199 | 0.877001800818196  | 1 | 2 | Emd      |
| 0.000294903071022254 | 0.503606651072915  | 1 | 2 | Wdr18    |
| 0.000296315387978286 | 0.367256659154312  | 1 | 2 | Ino80    |
| 0.000297686487848747 | -0.781767751430794 | 1 | 2 | Mrps21   |
| 0.000301616134572827 | 0.354975900810351  | 1 | 2 | Cdkn1a   |
| 0.00031373355982472  | 0.377385501222972  | 1 | 2 | Col4a5   |
| 0.000315108995844893 | 0.272413911953474  | 1 | 2 | Chd2     |
| 0.000315831427891194 | 0.559767873107918  | 1 | 2 | Angptl7  |
| 0.000315953587321119 | -0.868856294       | 1 | 2 | Brox     |
| 0.0003170727765916   | 0.303396984939427  | 1 | 2 | Umps     |
| 0.000321689275387637 | 0.291789153957468  | 1 | 2 | Ddr2     |
| 0.00032671252090479  | 0.494470072003225  | 1 | 2 | Hdgfrp3  |
| 0.000326970679281407 | 0.295577221002521  | 1 | 2 | Foxp2    |
| 0.000327567654232168 | 0.613138781084176  | 1 | 2 | AW112010 |
| 0.000327724392013036 | 0.671704230493379  | 1 | 2 | Gnao1    |
| 0.00033217033892779  | 0.519413454391929  | 1 | 2 | Ubxn2b   |
| 0.000332525860173567 | 0.706917099019766  | 1 | 2 | Las1l    |
| 0.000332847935370902 | 0.409060712966149  | 1 | 2 | Laptm4a  |
| 0.000339569683732282 | 0.348652836372972  | 1 | 2 | Gprasp2  |
| 0.000343692732415357 | 0.768515278843291  | 1 | 2 | Lepre1   |
| 0.000343923002807049 | -0.789727220887844 | 1 | 2 | Rlf      |
| 0.000344590490677062 | 0.697272433214535  | 1 | 2 | Mrpl39   |
| 0.00034896392160631  | 0.579023608033407  | 1 | 2 | Runx1    |
| 0.000352740762171781 | 0.759665388887928  | 1 | 2 | Ano1     |
| 0.00035720398450491  | 0.302882843895482  | 1 | 2 | Lgals3   |

|                      |                    |   |   |           |
|----------------------|--------------------|---|---|-----------|
| 0.000362023539082929 | 0.354919815838304  | 1 | 2 | Epyc      |
| 0.000367055349884446 | 0.394526196034631  | 1 | 2 | Ptpdc1    |
| 0.000368281579933976 | -0.310620777       | 1 | 2 | Emc1      |
| 0.000371150443178106 | 0.565836059449089  | 1 | 2 | Fosl2     |
| 0.000372013160305574 | 0.322512874048129  | 1 | 2 | Gab1      |
| 0.000373028430890658 | -0.460202834124183 | 1 | 2 | Adh1      |
| 0.000377048240125507 | 0.342978063396982  | 1 | 2 | Akap13    |
| 0.000378493740394941 | 0.649400498515012  | 1 | 2 | Atad2b    |
| 0.000379203141040786 | 0.515037800904114  | 1 | 2 | Mapkbp1   |
| 0.000380923422117462 | -0.734099581108869 | 1 | 2 | C1galt1c1 |
| 0.00038550097042568  | 0.578970753590264  | 1 | 2 | Ankrd40   |
| 0.000390650499447904 | 0.276485238231615  | 1 | 2 | Usp2      |
| 0.000392045799064485 | -1.303632806       | 1 | 2 | Amigo2    |
| 0.000394994274149444 | 0.664744499235089  | 1 | 2 | Pth1r     |
| 0.000395699264393616 | 0.296084567556083  | 1 | 2 | Fam53c    |
| 0.000397014134757296 | 0.626812706739604  | 1 | 2 | Ampd2     |
| 0.000400769065435317 | 0.315670116700142  | 1 | 2 | Add3      |
| 0.000400874748096831 | 0.317194270803616  | 1 | 2 | Kpna4     |
| 0.000406674631325005 | 0.349820952224984  | 1 | 2 | Tmem64    |
| 0.000409779506007661 | 0.493555587292884  | 1 | 2 | Nr2f2     |
| 0.000409805858419875 | -0.469882939549554 | 1 | 2 | Cyb5r3    |
| 0.000413030855283682 | 0.327039106091268  | 1 | 2 | Phf23     |
| 0.000414948790663918 | -0.817035773778814 | 1 | 2 | Adck3     |
| 0.000417469650403324 | 0.277081647082875  | 1 | 2 | Tmem198b  |
| 0.000417865534569847 | 0.457258462        | 1 | 2 | Nfs1      |
| 0.000433588807735969 | -0.361214705838709 | 1 | 2 | Eef1g     |
| 0.000439552575772431 | -0.540233102860487 | 1 | 2 | Cav1      |
| 0.00044175021509915  | 0.282837107        | 1 | 2 | Cdadcl    |
| 0.000446980651930502 | 0.413121173524963  | 1 | 2 | Ythdf1    |
| 0.000447515998342006 | -0.598872999       | 1 | 2 | Eif4a2    |
| 0.000449904145207558 | 0.666735420623715  | 1 | 2 | Kctd12b   |
| 0.000454945376429097 | 0.623911454112852  | 1 | 2 | Snx1      |
| 0.000455406601498185 | 0.614627601187317  | 1 | 2 | Srxn1     |
| 0.000456269916992127 | 0.304258974005168  | 1 | 2 | Dpy19l1   |
| 0.000457746613942817 | 0.435668561        | 1 | 2 | Dedd2     |
| 0.000463725768796437 | 0.759460415367809  | 1 | 2 | Mfsd5     |
| 0.000475748559972919 | 0.287412801579313  | 1 | 2 | Alkbh7    |
| 0.000480338454238487 | -0.810699870874487 | 1 | 2 | Net1      |
| 0.000489614537089099 | -1.224303925       | 1 | 2 | Tes       |
| 0.00049035322279774  | -0.574210242939911 | 1 | 2 | Sema3f    |
| 0.000492149078620002 | 0.890426374        | 1 | 2 | Mxd1      |
| 0.000492956461104227 | 0.335981025384926  | 1 | 2 | Ccdc23    |
| 0.00049342157252628  | -0.665452705       | 1 | 2 | Hnmpa1    |
| 0.000493568549620875 | 0.594338103486691  | 1 | 2 | Eif2d     |
| 0.000501582651068246 | 0.456217896738194  | 1 | 2 | Tmem29    |
| 0.000504464402745234 | 0.459021152283771  | 1 | 2 | Ubn2      |
| 0.000505128000046498 | 0.374029633753538  | 1 | 2 | Pabpn1    |
| 0.000509159028812407 | 0.381201848        | 1 | 2 | Smim13    |
| 0.000513365846437681 | 0.426715628285741  | 1 | 2 | Vwa1      |
| 0.000513457707876218 | -1.238777367       | 1 | 2 | Rasl11a   |
| 0.000513918366368364 | -0.732069386120663 | 1 | 2 | Ewsr1     |
| 0.000516893809819362 | 0.473028246088976  | 1 | 2 | Mecom     |
| 0.000524325485579511 | 0.367893679073478  | 1 | 2 | Uhrf2     |
| 0.000525968202223173 | -0.425187299327263 | 1 | 2 | Sep15     |
| 0.000555687719388931 | 0.260517164813889  | 1 | 2 | Kif13b    |
| 0.000557643581148344 | 0.451702291238931  | 1 | 2 | Msl1      |



|                      |                    |   |   |            |
|----------------------|--------------------|---|---|------------|
| 0.000558607375981856 | 0.468640486822875  | 1 | 2 | Prkcg      |
| 0.000559204762524262 | 0.470835008462814  | 1 | 2 | R3hdm1     |
| 0.000565861336809448 | 0.335569432103497  | 1 | 2 | Zswim6     |
| 0.000565945019121065 | 0.512259986        | 1 | 2 | Slc15a4    |
| 0.000566895307539741 | 0.347222705417781  | 1 | 2 | Nfia       |
| 0.000575315452611004 | 0.439246561958564  | 1 | 2 | Camsap2    |
| 0.00057594290414056  | 0.333049643        | 1 | 2 | Zfp593     |
| 0.000576756731822271 | -0.252772321479177 | 1 | 2 | Ccdc127    |
| 0.000577383233380152 | 0.336836529129354  | 1 | 2 | Ywhag      |
| 0.000577678007735148 | 0.432996166638952  | 1 | 2 | Fam19a5    |
| 0.000590335445675932 | 0.700036896246318  | 1 | 2 | Creb3l1    |
| 0.000594254188232456 | 0.777357416424448  | 1 | 2 | Ube3c      |
| 0.000598261134009722 | -1.099433801       | 1 | 2 | Cap2       |
| 0.000612429902812637 | 0.344954762573811  | 1 | 2 | Gpr108     |
| 0.000612868610652478 | -0.306318222802431 | 1 | 2 | Cox7c      |
| 0.000621273933408754 | 0.543812122762297  | 1 | 2 | Msto1      |
| 0.00062617304801631  | 0.451919486099583  | 1 | 2 | Cops5      |
| 0.000646510616341678 | 0.571196177871059  | 1 | 2 | Cyth2      |
| 0.000646952485583331 | 0.289034396692161  | 1 | 2 | Mtmr12     |
| 0.000661904801254999 | 0.416386754930105  | 1 | 2 | Nfe2l2     |
| 0.000666985341898079 | 0.700351041        | 1 | 2 | Wif1       |
| 0.000669348505650852 | -0.433480717626369 | 1 | 2 | Pcbp2      |
| 0.000670257622165844 | 0.303263929388538  | 1 | 2 | Sec31a     |
| 0.000678276205422062 | -0.554477751841395 | 1 | 2 | Cand2      |
| 0.000679147228093155 | 0.439214092844806  | 1 | 2 | Cd109      |
| 0.000679699451929264 | 0.339814394998224  | 1 | 2 | 2610507B11 |
| 0.000687861076925825 | 1.044805848        | 1 | 2 | Vcpip1     |
| 0.000694007404245472 | 1.644128483        | 1 | 2 | Ipmk       |
| 0.000695144327371548 | 0.428742793        | 1 | 2 | Zfp462     |
| 0.00069677342377243  | 0.347505666355306  | 1 | 2 | Sbno1      |
| 0.000697888037806509 | 0.684499007218006  | 1 | 2 | Diap2      |
| 0.000699347216050051 | 0.283282192798295  | 1 | 2 | Dnajc13    |
| 0.000711290480740875 | 0.318927926970303  | 1 | 2 | Abhd8      |
| 0.00071403973580145  | 0.387359946        | 1 | 2 | Cdk10      |
| 0.000715067514887932 | 0.380186807857519  | 1 | 2 | Lrrk1      |
| 0.000720468681366677 | 0.341437440385738  | 1 | 2 | Ndst1      |
| 0.000722429224517734 | 0.324816791982553  | 1 | 2 | B4galt5    |
| 0.000728127774570369 | -0.315046428283666 | 1 | 2 | Naa20      |
| 0.000748292950512726 | 1.191790438        | 1 | 2 | Thra       |
| 0.000757363961951594 | 0.444920242        | 1 | 2 | Atp13a1    |
| 0.000767811571872629 | 1.115059568        | 1 | 2 | Slc35a2    |
| 0.000778850934588404 | 0.303352642747312  | 1 | 2 | Ncoa1      |
| 0.000778867090390203 | 0.312908345211917  | 1 | 2 | Cox18      |
| 0.000780808360359178 | 0.413792163056843  | 1 | 2 | Vps53      |
| 0.000780974481951424 | 0.319662141393888  | 1 | 2 | Mob3c      |
| 0.000781663965403907 | 0.391962727163517  | 1 | 2 | Gtf3c2     |
| 0.000786707748554969 | 0.290984932        | 1 | 2 | Itfg1      |
| 0.000798683518377358 | 0.271486520592099  | 1 | 2 | Bdh2       |
| 0.000802768315647468 | 0.318450429050285  | 1 | 2 | Stx4a      |
| 0.000805236226932358 | 0.840753443830916  | 1 | 2 | Ism1       |
| 0.000807924692233732 | -0.697525022665857 | 1 | 2 | Ssbp1      |
| 0.000813390162033883 | 0.418663787810206  | 1 | 2 | Atp6v1a    |
| 0.000816532230346121 | 0.293161734676799  | 1 | 2 | Zkscan17   |
| 0.000822816551631434 | 0.347434189513773  | 1 | 2 | Arhgap32   |
| 0.00082693860663624  | -1.000125077       | 1 | 2 | Ppp2r5a    |
| 0.000828768181652414 | 0.745041275929755  | 1 | 2 | Rabgap1    |

|                      |                    |   |   |             |
|----------------------|--------------------|---|---|-------------|
| 0.000832260564954056 | 0.289337293307961  | 1 | 2 | Atg9a       |
| 0.000841395990464869 | 0.299331719326007  | 1 | 2 | St6galnac2  |
| 0.000844718076834004 | 0.280181184913659  | 1 | 2 | Guf1        |
| 0.000861927394828758 | 0.528931174585875  | 1 | 2 | Tm9sf4      |
| 0.000865754182734897 | 0.866559735727344  | 1 | 2 | Abcd4       |
| 0.000865897585263596 | 0.531467771929106  | 1 | 2 | Tnp03       |
| 0.00087334035298481  | -0.407453916       | 1 | 2 | Rbm17       |
| 0.000887949437210477 | 0.284759230505696  | 1 | 2 | Ctsc        |
| 0.000894391155285528 | 1.070182171        | 1 | 2 | Rpp25l      |
| 0.000911420373971125 | 0.397724798553876  | 1 | 2 | Zhx3        |
| 0.000923024960332219 | -0.383317478755092 | 1 | 2 | Atp5b       |
| 0.000924577429662755 | 0.691773005956538  | 1 | 2 | Homer3      |
| 0.000925380693021486 | 0.280571979351968  | 1 | 2 | Lamp2       |
| 0.000929023948057151 | 0.474808497257375  | 1 | 2 | Ccdc34      |
| 0.000944207757494929 | 0.378870962937337  | 1 | 2 | Klf9        |
| 0.00100282733140179  | -0.280993447475446 | 1 | 2 | Eif2s2      |
| 0.00101282147485268  | 0.785518487508237  | 1 | 2 | Tmcc1       |
| 0.0010181258185111   | 0.322720420124301  | 1 | 2 | Flt1        |
| 0.00101920625795062  | 0.422441318725976  | 1 | 2 | Fnbp1       |
| 0.00103175533008442  | 0.511446548964457  | 1 | 2 | Mmgt1       |
| 0.00107340464897919  | 0.594280524        | 1 | 2 | Ric8b       |
| 0.00108520157301549  | 0.403081129860617  | 1 | 2 | Rnf11       |
| 0.00108674263897213  | 0.545720007719528  | 1 | 2 | Peak1       |
| 0.00111106977915404  | 0.503184516687202  | 1 | 2 | Agtrap      |
| 0.00111422337141687  | 0.386629794228888  | 1 | 2 | Spen        |
| 0.00112963478360102  | 0.521985925537302  | 1 | 2 | Ogfr        |
| 0.00117263625555675  | 0.342850214868014  | 1 | 2 | Arid5a      |
| 0.00118586404642368  | 0.532961131        | 1 | 2 | Lage3       |
| 0.00118876192980307  | 0.577683250653412  | 1 | 2 | Cbx4        |
| 0.00123496285182494  | 0.679141132008634  | 1 | 2 | Ipo7        |
| 0.00123726378083462  | 0.476106809225171  | 1 | 2 | Rfx7        |
| 0.00124442397994742  | 0.436302075256269  | 1 | 2 | Psen1       |
| 0.00128688169607937  | 0.358182884252344  | 1 | 2 | Crtap       |
| 0.00129780168152332  | 0.261952178214432  | 1 | 2 | Mdn1        |
| 0.00130551449921897  | -0.304192461463404 | 1 | 2 | Psmd4       |
| 0.00133806174275941  | -0.706710065       | 1 | 2 | Wdr83os     |
| 0.00133861619055912  | 0.364085004143453  | 1 | 2 | Tcf12       |
| 0.00133936167992909  | -1.099548862       | 1 | 2 | Sgcg        |
| 0.00134221734395106  | -0.690177950377752 | 1 | 2 | Psmb5       |
| 0.00138581710699194  | 0.322486374292942  | 1 | 2 | Gspt1       |
| 0.00142953828425581  | 0.297166435188791  | 1 | 2 | Tro         |
| 0.00143900315503645  | 0.589019545577508  | 1 | 2 | Tns3        |
| 0.0014501497063905   | -0.891836279616764 | 1 | 2 | Nop10       |
| 0.00146291735174765  | 0.274365393283975  | 1 | 2 | Nfix        |
| 0.00148252736011882  | 0.582069065794661  | 1 | 2 | Hand2       |
| 0.00150458783676478  | 0.337969868051861  | 1 | 2 | Samd14      |
| 0.00151292909023894  | 0.397536257156697  | 1 | 2 | Sf3b3       |
| 0.00151762784692808  | 0.300059443        | 1 | 2 | Atf5        |
| 0.00152310196444556  | 0.36695567         | 1 | 2 | Bcor1       |
| 0.00152385129405652  | 0.530294602613321  | 1 | 2 | Nup153      |
| 0.00152650637977695  | 0.334683778813821  | 1 | 2 | 1110008P14F |
| 0.00153231079505672  | 0.339468415071308  | 1 | 2 | E4f1        |
| 0.00153875821538584  | -0.553958358295315 | 1 | 2 | Rhoj        |
| 0.00155836766347669  | 0.454447109543691  | 1 | 2 | Dlg5        |
| 0.00156845306588884  | 0.320760137156358  | 1 | 2 | Limch1      |
| 0.00156953232105087  | 0.338103412831293  | 1 | 2 | Dcaf4       |

|                     |                    |   |   |             |
|---------------------|--------------------|---|---|-------------|
| 0.00157732246373164 | -0.812532305       | 1 | 2 | Llph        |
| 0.00157844140650717 | 0.391246034927041  | 1 | 2 | Map4        |
| 0.00159030477071455 | 0.306546789992299  | 1 | 2 | 1190002N15I |
| 0.00159287879354797 | 0.475973576779606  | 1 | 2 | Nbea        |
| 0.00160794166448552 | 0.500314681131194  | 1 | 2 | Myo6        |
| 0.00161457572652833 | -0.752128680075028 | 1 | 2 | Ppme1       |
| 0.00162422293310493 | 0.767767510850756  | 1 | 2 | Mtmr4       |
| 0.0016256398258757  | -0.804776555       | 1 | 2 | Srsf4       |
| 0.00165394904386645 | -1.390811404       | 1 | 2 | Cdh5        |
| 0.00165697015614464 | 0.408144676292712  | 1 | 2 | Pde3b       |
| 0.00166398166326254 | 0.680635327563487  | 1 | 2 | Ctif        |
| 0.0016809416988269  | 1.010168529        | 1 | 2 | Snx21       |
| 0.00174507342133909 | 0.503738925759039  | 1 | 2 | H2-Ab1      |
| 0.00174962525755879 | 0.667424850418857  | 1 | 2 | Smad1       |
| 0.00175183872531515 | -0.444672068940741 | 1 | 2 | Cd200       |
| 0.00175707877249128 | 0.262699531175295  | 1 | 2 | Fndc3a      |
| 0.00176328513486641 | -0.297252436263546 | 1 | 2 | Mien1       |
| 0.00176746024725251 | 0.316321700462512  | 1 | 2 | Gpr133      |
| 0.00178729095915142 | -0.954979770754009 | 1 | 2 | Hey2        |
| 0.00179743310454286 | 0.571134472814997  | 1 | 2 | Akap2       |
| 0.00180892615557227 | -0.590696959276285 | 1 | 2 | BC002163    |
| 0.00181048741742054 | 0.302579875483013  | 1 | 2 | 0610037L13F |
| 0.00181910503014427 | 0.949923023688089  | 1 | 2 | RbmX        |
| 0.00188315894780586 | 0.364083467281433  | 1 | 2 | Kcnab1      |
| 0.00188604991977422 | -0.841792245277409 | 1 | 2 | Mmp17       |
| 0.00192489578656272 | -0.313799797029505 | 1 | 2 | Tmbim4      |
| 0.00193378800329846 | 1.121614073        | 1 | 2 | Pepd        |
| 0.00194227046544977 | 0.515229687881165  | 1 | 2 | Camkk2      |
| 0.00195104106645903 | 0.841865824748468  | 1 | 2 | Enc1        |
| 0.00196931133756729 | -0.357312191052857 | 1 | 2 | Hnmph1      |
| 0.00197623500255165 | -0.477974823474155 | 1 | 2 | Scn1b       |
| 0.00200407249224432 | -0.442245779049543 | 1 | 2 | Mesdc2      |
| 0.00205855104232072 | 0.988848256920432  | 1 | 2 | Irgq        |
| 0.00206369498173575 | 0.253281677512703  | 1 | 2 | Nab1        |
| 0.0020939305697488  | 0.782887574191533  | 1 | 2 | Slc2a10     |
| 0.00212704050435918 | -0.331207362996351 | 1 | 2 | Tomm7       |
| 0.00214145109639254 | -0.716824768427929 | 1 | 2 | Srgn        |
| 0.00214870164744532 | -0.453408397583208 | 1 | 2 | Ndufv1      |
| 0.00218442598356649 | -0.313566506377692 | 1 | 2 | Zfp266      |
| 0.00219910279395597 | -0.681091020434564 | 1 | 2 | Rras2       |
| 0.00220058740840277 | 0.346694149545067  | 1 | 2 | Cdc27       |
| 0.00221534191786651 | 0.322154099254957  | 1 | 2 | Srgap3      |
| 0.00221838962644366 | 0.302065689        | 1 | 2 | 1110058L19F |
| 0.00222306056829591 | 0.457124085515735  | 1 | 2 | Elp3        |
| 0.00222981600966189 | 0.252350846        | 1 | 2 | Cstb        |
| 0.00223683423950404 | 0.855261310283507  | 1 | 2 | Ldlrad3     |
| 0.00224073408582378 | 0.483145694051899  | 1 | 2 | Tcerg1      |
| 0.00227573574847079 | 0.331579044523862  | 1 | 2 | Sik3        |
| 0.00228508239882562 | 0.972361024030852  | 1 | 2 | Rap2c       |
| 0.00232898850464053 | -1.217586157       | 1 | 2 | Mgst3       |
| 0.00233024362471625 | 0.447647528736486  | 1 | 2 | Pcdh9       |
| 0.00233204985239008 | -0.491014146873131 | 1 | 2 | Smim14      |
| 0.00236160792701741 | -0.590202092956729 | 1 | 2 | Dock6       |
| 0.00237764713366037 | 0.398431151186154  | 1 | 2 | Scoc        |
| 0.00238514318100276 | 0.882104842721813  | 1 | 2 | Mdm2        |
| 0.00239741624022058 | 0.292221861504621  | 1 | 2 | Ip6k1       |

|                     |                    |   |   |          |
|---------------------|--------------------|---|---|----------|
| 0.00242800544206038 | -1.142867375       | 1 | 2 | Ahsa1    |
| 0.00243859273217992 | -0.259625405966085 | 1 | 2 | Myl6     |
| 0.0024635699061819  | 0.749661376069599  | 1 | 2 | Sbf2     |
| 0.00247327569074921 | 0.31619465         | 1 | 2 | Laptm4b  |
| 0.00248028835069272 | -0.264921111563963 | 1 | 2 | Rbm8a    |
| 0.002529434         | -0.279519998244073 | 1 | 2 | Marc2    |
| 0.00264598591269314 | -0.291642473667878 | 1 | 2 | Pcmt1    |
| 0.00267667724929304 | 0.426532847326707  | 1 | 2 | Ubp1     |
| 0.00270639290607143 | 0.700729597880015  | 1 | 2 | Neat1    |
| 0.00272430678104417 | 0.313470350197967  | 1 | 2 | Ifi203   |
| 0.0027530926951453  | -0.256790138       | 1 | 2 | Rit1     |
| 0.00278822691610561 | 0.268086971330131  | 1 | 2 | Ppp1r12a |
| 0.00285467406190716 | 0.258991613227965  | 1 | 2 | Kras     |
| 0.00291750746889698 | -0.945998212263287 | 1 | 2 | Pck2     |
| 0.00292484712510985 | -1.005980539       | 1 | 2 | B3galt1  |
| 0.00295629816594927 | 0.290094894055683  | 1 | 2 | Alkbh5   |
| 0.00296468574334768 | 0.370282304359492  | 1 | 2 | Ednra    |
| 0.00297928835376677 | -0.828141374970599 | 1 | 2 | Rasl12   |
| 0.00300032563387574 | 0.357750853722805  | 1 | 2 | Myo18a   |
| 0.00300472793656095 | 0.387373752491753  | 1 | 2 | Celf1    |
| 0.00301749121156755 | 0.372499775462441  | 1 | 2 | Fam111a  |
| 0.00304488553666776 | 0.503320119201614  | 1 | 2 | Tbc1d9b  |
| 0.00304546032070452 | 0.338566141        | 1 | 2 | Pcsk5    |
| 0.00304632201229857 | 0.358885841250155  | 1 | 2 | Ralgapb  |
| 0.00307688102397438 | -0.254878826052565 | 1 | 2 | Per1     |
| 0.00313236201938038 | 0.467305828        | 1 | 2 | Rfwd2    |
| 0.00315766873465285 | 0.536204322638779  | 1 | 2 | Chpt1    |
| 0.00316650282087386 | 0.456737752976561  | 1 | 2 | Zfp62    |
| 0.00319291040242203 | 0.725858898        | 1 | 2 | Csad     |
| 0.00320241588887446 | 0.381841752380873  | 1 | 2 | Akap7    |
| 0.00322392903193853 | 0.737679968859352  | 1 | 2 | Dcakd    |
| 0.00329430746811284 | 0.626325769750864  | 1 | 2 | Ppp3ca   |
| 0.00333825575761911 | 0.260075924497348  | 1 | 2 | Zdhhc20  |
| 0.00336827466617828 | 0.344107144420105  | 1 | 2 | Micu2    |
| 0.00337010738161355 | 0.262080554511209  | 1 | 2 | Foxc2    |
| 0.00338760552699247 | 0.252119257298193  | 1 | 2 | Ap3s2    |
| 0.00340430804333676 | 0.911420179567043  | 1 | 2 | Fyn      |
| 0.00344022393454066 | 0.363100496407475  | 1 | 2 | Pink1    |
| 0.00345011738406109 | 0.296496337827783  | 1 | 2 | Sh3pxd2b |
| 0.00347947014236847 | -0.798141367536386 | 1 | 2 | Zfp414   |
| 0.00351634151105966 | 1.247674736        | 1 | 2 | Idua     |
| 0.00353804813544825 | -0.818257773266871 | 1 | 2 | Med21    |
| 0.00359763367997784 | 0.325611084        | 1 | 2 | Chd4     |
| 0.00363718987170065 | -0.250355822838051 | 1 | 2 | Ppib     |
| 0.00366566316497047 | 0.270811390310346  | 1 | 2 | Siae     |
| 0.00367552684288286 | 0.375778598024837  | 1 | 2 | Egr2     |
| 0.00372323040004922 | 0.420159049286119  | 1 | 2 | Tgm2     |
| 0.00374159035355081 | 0.323742128242472  | 1 | 2 | Itga7    |
| 0.00374563793561864 | 0.403669155425394  | 1 | 2 | Ttc9c    |
| 0.00375569274881392 | 0.466588519023149  | 1 | 2 | Gtf3c6   |
| 0.00376552701448582 | 0.498724985696258  | 1 | 2 | Gm17455  |
| 0.00381305916011856 | -0.457410844476406 | 1 | 2 | Nudcd3   |
| 0.00385812820847521 | -1.124356618       | 1 | 2 | Cd24a    |
| 0.00387212501695703 | 0.918921019518135  | 1 | 2 | Bcor     |
| 0.00387955803949536 | 0.265369974311453  | 1 | 2 | Emp1     |
| 0.0038929766418403  | 0.952413918082174  | 1 | 2 | Prpf19   |

|                     |                    |   |   |          |
|---------------------|--------------------|---|---|----------|
| 0.00393334373838167 | 0.297810202167386  | 1 | 2 | Abi1     |
| 0.00396206609154075 | -0.702468115585865 | 1 | 2 | Supt4a   |
| 0.00397530623895103 | 0.296697674292602  | 1 | 2 | Rab10    |
| 0.00403786090856681 | 0.928766128463896  | 1 | 2 | Ngf      |
| 0.00404436267351553 | -0.743481313033846 | 1 | 2 | H2afz    |
| 0.00404785207166295 | -1.14847424        | 1 | 2 | Gkn3     |
| 0.00408626959123802 | -0.954391532407644 | 1 | 2 | Plcd1    |
| 0.00410625279123472 | 0.454994175198014  | 1 | 2 | Pml      |
| 0.00415650092151363 | 0.281675387651608  | 1 | 2 | Rapgef1  |
| 0.00415829194283503 | 0.688073468986402  | 1 | 2 | Abi2     |
| 0.00416195969556075 | -0.603308729172261 | 1 | 2 | Rcor1    |
| 0.00418144361921863 | 0.598581313569676  | 1 | 2 | Ifi35    |
| 0.00419927933382301 | 0.683617643585865  | 1 | 2 | Cpeb2    |
| 0.00423952223703753 | 0.477590615635729  | 1 | 2 | Rsf1     |
| 0.00425741162922166 | 0.342594314717205  | 1 | 2 | Ncln     |
| 0.00429906242173225 | 0.278951940354156  | 1 | 2 | Jun      |
| 0.00432688428905397 | 0.304727241386882  | 1 | 2 | Jag1     |
| 0.00435535630926691 | 0.382468353405325  | 1 | 2 | Nr4a1    |
| 0.00437295823900629 | -0.765008711482432 | 1 | 2 | Glo1     |
| 0.0043757695642083  | -0.491989100896613 | 1 | 2 | Snrpa    |
| 0.00438005738586994 | 0.625651940503641  | 1 | 2 | Ptn      |
| 0.00439982025322748 | 0.284532098087728  | 1 | 2 | Slc39a7  |
| 0.00454514862625023 | -0.577743018       | 1 | 2 | Tomm20   |
| 0.00458237846111291 | -0.626841544194364 | 1 | 2 | Capzb    |
| 0.00471629318813712 | -0.493328301812144 | 1 | 2 | Nifk     |
| 0.00485700834383702 | -0.807756826235828 | 1 | 2 | Cdkal1   |
| 0.00491130150014515 | 0.483590593477179  | 1 | 2 | Gigyf2   |
| 0.00494469690789909 | 0.275571528618875  | 1 | 2 | Tmem175  |
| 0.00496757709830651 | 0.482536774832104  | 1 | 2 | Fmn13    |
| 0.00497522839540329 | 0.390561897770515  | 1 | 2 | Pcnx     |
| 0.00499605744837231 | 0.306249615374399  | 1 | 2 | Il13ra1  |
| 0.00507165933184575 | 0.486403707912978  | 1 | 2 | Pdxdc1   |
| 0.00510836037323019 | -0.895844340826983 | 1 | 2 | Hnmp1    |
| 0.00511925538768332 | -0.254437941       | 1 | 2 | Cox6b1   |
| 0.00513241952603061 | 0.362715609426854  | 1 | 2 | Epc2     |
| 0.00519442892565786 | 0.458685559009924  | 1 | 2 | Lrig2    |
| 0.00524668843370664 | 0.287407382620653  | 1 | 2 | Ank      |
| 0.00532693616595965 | -0.905916451840717 | 1 | 2 | Cdo1     |
| 0.00533812874720883 | 0.296299808910442  | 1 | 2 | Fxr2     |
| 0.00535978269798332 | -0.420897087031896 | 1 | 2 | Ptgis    |
| 0.00541441190018532 | -0.256013467       | 1 | 2 | Abhd14a  |
| 0.00544688648894223 | 0.339723578        | 1 | 2 | Sin3a    |
| 0.00548455518571163 | -0.351880301       | 1 | 2 | Serf2    |
| 0.00551892926497945 | 0.297759960618134  | 1 | 2 | Polk     |
| 0.00551975648580144 | 0.565231529497781  | 1 | 2 | Fbxo33   |
| 0.00552640167843938 | 0.508266609517476  | 1 | 2 | Tceal8   |
| 0.00560425835831708 | -0.424857115262438 | 1 | 2 | S100a10  |
| 0.00560571811419485 | 0.278816682755374  | 1 | 2 | Pcf11    |
| 0.00564661364624677 | -0.294499804364047 | 1 | 2 | Ngfrap1  |
| 0.00567967888811608 | 0.394759047166708  | 1 | 2 | Akap11   |
| 0.0056861709776807  | 0.953362555485348  | 1 | 2 | Bcas3    |
| 0.00574304552624193 | 0.323572844256897  | 1 | 2 | Pisd-ps1 |
| 0.00577268110889666 | 0.254110033096224  | 1 | 2 | Mybbp1a  |
| 0.00577511339601104 | 0.848125902550275  | 1 | 2 | Ube3a    |
| 0.00589162521653199 | 0.389230985346281  | 1 | 2 | Fam174b  |
| 0.00591356772564724 | 0.320143855785633  | 1 | 2 | Rgs12    |



|                     |                    |   |   |             |
|---------------------|--------------------|---|---|-------------|
| 0.0059179886549576  | 0.674760529149276  | 1 | 2 | Plod1       |
| 0.00596556154059338 | 0.273094733284748  | 1 | 2 | B3galnt1    |
| 0.00598488096387713 | 0.427346005361409  | 1 | 2 | Nasp        |
| 0.00604101136672037 | -0.586638841540876 | 1 | 2 | Stard13     |
| 0.00608521972748036 | -0.706477408964024 | 1 | 2 | Sgk1        |
| 0.00615977658331061 | -0.615857387540016 | 1 | 2 | Pawr        |
| 0.00619933169533779 | 0.337533222573755  | 1 | 2 | Bag3        |
| 0.00620237421278133 | 0.963503546487712  | 1 | 2 | Pi4k2a      |
| 0.00626745308577229 | -0.312898299       | 1 | 2 | Oard1       |
| 0.00627920573831144 | -0.637260212124972 | 1 | 2 | Zfp598      |
| 0.00627948976040084 | 0.447710182        | 1 | 2 | Rnpepl1     |
| 0.00628084884930248 | 0.597516113665551  | 1 | 2 | Naprt1      |
| 0.00633141416566778 | 0.270447888404225  | 1 | 2 | Chchd6      |
| 0.00638193500633904 | -0.256574076077446 | 1 | 2 | Aplp2       |
| 0.0064222948718885  | -0.509473299525611 | 1 | 2 | 2610002J02F |
| 0.00651719096578394 | 0.951422408050997  | 1 | 2 | Arfgap1     |
| 0.00655743889856516 | -0.290783430885703 | 1 | 2 | Supt16      |
| 0.00678541383555295 | 0.346615404309912  | 1 | 2 | Fam98a      |
| 0.00678572334441156 | -0.708950845733071 | 1 | 2 | Tbc1d1      |
| 0.0068501396405128  | -0.379806727384387 | 1 | 2 | 2900060B14F |
| 0.00686074893817425 | 0.440785662963707  | 1 | 2 | Pmp         |
| 0.00687691165217546 | 0.296017776974544  | 1 | 2 | BC005561    |
| 0.00687781733474762 | 0.259812015774713  | 1 | 2 | Cog2        |
| 0.00693714886256746 | -0.786665585862897 | 1 | 2 | Zcchc14     |
| 0.00694661205033546 | 0.555183891377008  | 1 | 2 | Rnf144a     |
| 0.00697792132760493 | -0.539570234614826 | 1 | 2 | Anapc11     |
| 0.00699631204348165 | 0.673466118        | 1 | 2 | Mme         |
| 0.00702854942699282 | 0.373044289497131  | 1 | 2 | Hjurp       |
| 0.00706272645998187 | 0.642852244558367  | 1 | 2 | Frs2        |
| 0.00709672759406134 | 0.370320907347071  | 1 | 2 | Adam10      |
| 0.00715876868350556 | 0.526597165234338  | 1 | 2 | Cnnm3       |
| 0.00717502789762012 | -0.344110351564257 | 1 | 2 | Ctnnb1      |
| 0.00721303380363698 | -0.614624721744488 | 1 | 2 | Parp1       |
| 0.00731103660430447 | 0.512525586681981  | 1 | 2 | Fam208a     |
| 0.00740351607528638 | 0.284965771070489  | 1 | 2 | Wbp1l       |
| 0.00745677548921956 | -0.305947542647633 | 1 | 2 | Yif1a       |
| 0.00745749858396815 | 0.476215643367675  | 1 | 2 | Tsc22d4     |
| 0.0074721547695364  | -0.748718885800094 | 1 | 2 | Ptpla       |
| 0.00747680957855441 | -0.391618033574427 | 1 | 2 | Gle1        |
| 0.00749317277991002 | 0.614817101722983  | 1 | 2 | Slc35b2     |
| 0.00751914161633529 | 0.390986718        | 1 | 2 | Dnase1l1    |
| 0.00754104411024944 | -0.588138574012656 | 1 | 2 | Eif3m       |
| 0.00756599338547291 | -0.440541896520714 | 1 | 2 | Anxa1       |
| 0.00757890785982873 | 0.512998230798806  | 1 | 2 | Abhd11      |
| 0.00758868816642698 | -1.521953326       | 1 | 2 | Ramp1       |
| 0.0077304810296294  | 0.545322192240124  | 1 | 2 | Champ1      |
| 0.00773859378149293 | 0.353659698701974  | 1 | 2 | Ugg2        |
| 0.00774406723141508 | 0.314644874904016  | 1 | 2 | Il17rc      |
| 0.00777091553408682 | 0.808289312067994  | 1 | 2 | Abcb1a      |
| 0.00779578909659066 | -0.284018370010221 | 1 | 2 | Sec13       |
| 0.00787699165275486 | -0.576462990552176 | 1 | 2 | Tnc         |
| 0.00790049298440671 | 0.328632522253164  | 1 | 2 | Morc4       |
| 0.00801845525699453 | -0.636915028088347 | 1 | 2 | A4galt      |
| 0.00810937000536875 | -0.525456602878543 | 1 | 2 | Osbpl3      |
| 0.00814483193162466 | -0.790734197884391 | 1 | 2 | Ptp4a3      |
| 0.00818313119697622 | -0.294501737390193 | 1 | 2 | Reep5       |

|                     |                    |   |   |             |
|---------------------|--------------------|---|---|-------------|
| 0.00827252040899677 | -0.987893069464183 | 1 | 2 | Samp        |
| 0.00828284101704338 | 0.418325605        | 1 | 2 | Kdm5c       |
| 0.00835364994034208 | -0.886199765770763 | 1 | 2 | Cyb5r1      |
| 0.00843304686454711 | -0.873624204334048 | 1 | 2 | Npr1        |
| 0.00843618292674687 | 0.338099706361465  | 1 | 2 | Rasa2       |
| 0.0084395455073037  | 0.648830328880672  | 1 | 2 | Ltn1        |
| 0.00847255322090814 | -0.348845903935199 | 1 | 2 | Ensa        |
| 0.00850705998646734 | 0.255488041437952  | 1 | 2 | Ddx21       |
| 0.00857252406723221 | -0.410172611       | 1 | 2 | Myct1       |
| 0.00863281904377135 | 0.294452579018992  | 1 | 2 | Gpr64       |
| 0.00864577731105682 | 0.604533304200467  | 1 | 2 | Psmd10      |
| 0.00866722396967239 | 0.499496374518516  | 1 | 2 | Vhl         |
| 0.00868818098048761 | 0.293466599873609  | 1 | 2 | Aim         |
| 0.00880380841978177 | -0.861521205860708 | 1 | 2 | Cuedc1      |
| 0.00883763365046446 | -0.602418068327904 | 1 | 2 | 2310035C23f |
| 0.008853917         | 0.255277516016762  | 1 | 2 | Jarid2      |
| 0.0088766340859356  | -1.067288102       | 1 | 2 | Kctd12      |
| 0.00888661351034775 | -0.762511606587642 | 1 | 2 | Casp12      |
| 0.00898866099193227 | 0.258815243814871  | 1 | 2 | Tia1        |
| 0.00899481071248259 | -0.911252650649072 | 1 | 2 | Zscan26     |
| 0.00908597415548781 | -0.437535080032054 | 1 | 2 | Atp6v0e     |
| 0.00911490133059441 | 0.583283661        | 1 | 2 | Ankrd13a    |
| 0.00914518600215146 | -0.618278344515805 | 1 | 2 | Rnft1       |
| 0.00916038865707216 | -0.389352128271881 | 1 | 2 | Cox7a2      |
| 0.00922583439417217 | 0.498625023697601  | 1 | 2 | Tnfrsf11b   |
| 0.0092911677706619  | -0.721804298689652 | 1 | 2 | Dguok       |
| 0.00936441591046651 | 0.296430607        | 1 | 2 | Cys1        |
| 0.00942935682827861 | 0.418398991901847  | 1 | 2 | Carhsp1     |
| 0.00965142584333311 | 0.317006976382514  | 1 | 2 | Timm17b     |
| 0.00969250059633859 | 0.598938962444831  | 1 | 2 | Smim8       |
| 0.00978453286371762 | 0.319967428103408  | 1 | 2 | Ralgds      |
| 0.00981045918583066 | 0.383565725607395  | 1 | 2 | Gstt3       |
| 0.00983983647538663 | -0.852348592915208 | 1 | 2 | Rassf3      |
| 0.00987492151321038 | 0.276363562721116  | 1 | 2 | Wnk1        |
| 0.00990754179511919 | -0.625124486120474 | 1 | 2 | Rtca        |
| 0.00999630971850392 | 0.458046814541375  | 1 | 2 | Cicn3       |

| p_val                | avg_logFC      | p_val_adj            | cluster | gene     |
|----------------------|----------------|----------------------|---------|----------|
| 3.08360641213438e-54 | 2.32           | 4.25876881579879e-50 | 3       | Pecam1   |
| 4.48214210370383e-53 | 2.48           | 6.19028645942535e-49 | 3       | Egfl7    |
| 1.10725046001991e-46 | 2.33           | 1.5292236103335e-42  | 3       | Ptpnb    |
| 1.50157481877624e-45 | -1.87          | 2.07382498221187e-41 | 3       | Rarres2  |
| 6.91476987937604e-45 | 2.19           | 9.54998868040625e-41 | 3       | Mmm2     |
| 1.65056030647539e-44 | 2.61           | 2.27958883927315e-40 | 3       | Cdh5     |
| 2.17688419446862e-44 | 2.07           | 3.00649476098061e-40 | 3       | Sox18    |
| 9.3267191881618e-43  | 2.47           | 1.28811318707703e-38 | 3       | Cd93     |
| 2.06344834842407e-41 | -1.81          | 2.84982851400849e-37 | 3       | Lrp1     |
| 2.64031108138754e-41 | 2.45           | 3.64653363450434e-37 | 3       | Tie1     |
| 3.81235347483192e-41 | -1.47          | 5.26524138409037e-37 | 3       | Col1a1   |
| 4.06910086295195e-41 | -1.24          | 5.61983520182294e-37 | 3       | Col1a2   |
| 1.05317475628774e-40 | -1.47          | 0.00                 | 3       | Col3a1   |
| 4.00091276138458e-40 | 2.59           | 5.52566061474825e-36 | 3       | Vwf      |
| 1.67774605363413e-39 | -2.07          | 2.3171350746741e-35  | 3       | Col6a1   |
| 6.31155426524216e-39 | -1.51          | 8.71688759572595e-35 | 3       | Ogn      |
| 1.79388650713616e-38 | -1.14          | 2.47753665500575e-34 | 3       | Lgals1   |
| 1.17964844440998e-37 | 2.50           | 1.62921246657462e-33 | 3       | Bmx      |
| 1.63190598304738e-37 | 2.03           | 2.25382535318673e-33 | 3       | Cldn5    |
| 1.81692003424286e-37 | -0.97          | 2.50934825929281e-33 | 3       | Igfbp7   |
| 1.86857565992536e-36 | 1.61           | 2.58068984392292e-32 | 3       | Ece1     |
| 3.998482221115E-36   | 2.65           | 5.52230379558193e-32 | 3       | Nos3     |
| 8.78210710981125e-36 | -2.27          | 1.21289681293603e-31 | 3       | Htra3    |
| 3.82277527454188e-35 | 1.54           | 5.27963493166979e-31 | 3       | Epas1    |
| 4.47633092852822e-35 | -2.19          | 6.18226064539032e-31 | 3       | Islr     |
| 7.89967750653228e-35 | 2.53           | 1.09102446042717e-30 | 3       | Stab1    |
| 3.56375573814487e-34 | 1.86           | 4.92190304995187e-30 | 3       | Bmp6     |
| 2.73793727363411e-33 | 2.46           | 3.78136516861607e-29 | 3       | Icam2    |
| 4.36561042881657e-33 | -1.59          | 6.02934456323857e-29 | 3       | Axl      |
| 4.87324842863024e-33 | -1.60          | 6.73044340478122e-29 | 3       | Fxyd1    |
| 8.22486121754493e-33 | -1.37          | 1.13593558275513e-28 | 3       | Prep     |
| 4.945084882327E-32   | 2.50           | 6.82965673098181e-28 | 3       | Myct1    |
| 5.62865060675229e-32 | -1.03          | 7.77372935298558e-28 | 3       | Mt1      |
| 7.69327443883966e-32 | 1.57           | 1.06251813274815e-27 | 3       | Cytl1    |
| 3.29247205846908e-31 | -2.25          | 4.54723315995165e-27 | 3       | Dpt      |
| 9.42933986484356e-31 | -1.31          | 1.30228612873354e-26 | 3       | Gsn      |
| 1.36921914957197e-30 | -1.58          | 1.89102856747385e-26 | 3       | Serping1 |
| 1.6350745352467e-30  | -1.46          | 2.25820144062921e-26 | 3       | Ddr2     |
| 2.26369827448188e-30 | 2.22           | 3.12639368688692e-26 | 3       | Clec14a  |
| 3.36481968258985e-30 | 0.921334630166 | 4.64715246362485e-26 | 3       | Clu      |
| 6.29815793214922e-30 | 0.907930005597 | 8.69838592009129e-26 | 3       | Tm4sf1   |
| 1.19189118881796e-29 | -1.69          | 1.64612092087648e-25 | 3       | Lox1     |
| 1.23106855581153e-29 | -1.10          | 1.7002287824313e-25  | 3       | Aebp1    |
| 2.14287456299272e-29 | 2.25           | 2.95952405894925e-25 | 3       | Tek      |
| 3.21172685569651e-29 | -1.93          | 4.43571596040245e-25 | 3       | Mmp23    |
| 3.60755756627621e-29 | 2.09           | 4.98239775478408e-25 | 3       | Ecscr    |
| 3.64509164489372e-29 | -2.10          | 5.03423607076271e-25 | 3       | Fbln1    |
| 3.9388143280219e-29  | 1.76           | 5.43989646843105e-25 | 3       | Srgn     |
| 4.35804990982325e-29 | 2.21           | 6.01890273045689e-25 | 3       | Esam     |
| 5.27292220181274e-29 | -1.76          | 7.28243285292358e-25 | 3       | Adamts2  |
| 6.80187252811733e-29 | -1.37          | 9.39406614858285e-25 | 3       | Col6a2   |
| 1.68541384218061e-28 | -1.15          | 2.32772505743564e-24 | 3       | Ecm1     |
| 2.19026981156426e-28 | 2.18           | 3.0249816367514e-24  | 3       | Podxl    |
| 3.23729443996698e-28 | -1.49          | 4.47102735103839e-24 | 3       | Mt2      |
| 8.47316421895671e-28 | -1.92          | 1.17022871028011e-23 | 3       | Abcc9    |

|                      |                |                      |   |          |
|----------------------|----------------|----------------------|---|----------|
| 1.16661511445548e-27 | -2.24          | 1.61121213457446e-23 | 3 | Cygb     |
| 1.44495876733605e-27 | 1.75           | 1.99563255356782e-23 | 3 | Lmo2     |
| 3.30056517002334e-27 | 2.35           | 4.55841055631924e-23 | 3 | Gja5     |
| 4.64911497307941e-27 | -0.77634062331 | 6.42089268931998e-23 | 3 | Dkk3     |
| 8.45517179437664e-27 | -1.93          | 1.16774377652136e-22 | 3 | Pcolce   |
| 9.67923711505691e-27 | -1.48          | 1.33679943796051e-22 | 3 | Cd302    |
| 1.07688930458714e-26 | -1.70          | 1.48729181856531e-22 | 3 | Abi3bp   |
| 1.15599695973277e-26 | 0.992412826685 | 1.59654740108692e-22 | 3 | Ly6e     |
| 1.70370586689538e-26 | -1.85          | 2.35298817276921e-22 | 3 | Gpx8     |
| 1.82316763910197e-26 | -1.48          | 2.51797682636373e-22 | 3 | Lum      |
| 3.72855365870128e-26 | 2.20           | 5.14950545803234e-22 | 3 | Cd24a    |
| 4.78416900271514e-26 | 1.80           | 6.60741580964988e-22 | 3 | Itgb4    |
| 7.37933221597057e-26 | -2.09          | 1.0191595723477e-21  | 3 | Lama2    |
| 1.10913841605806e-25 | 1.50           | 1.53183106641778e-21 | 3 | Fam3c    |
| 1.25537113804442e-25 | 2.72           | 1.73379307875315e-21 | 3 | AU021092 |
| 1.45299942444724e-25 | -1.93          | 2.00673750510409e-21 | 3 | Crispld2 |
| 1.45412477318832e-25 | 2.03           | 2.00829172425038e-21 | 3 | Tmem158  |
| 1.75573919119661e-25 | -2.24          | 2.42485139696164e-21 | 3 | Abca8a   |
| 2.10034099688849e-25 | 1.63           | 2.90078095080269e-21 | 3 | Sdpr     |
| 2.49006581884423e-25 | -1.56          | 3.43902990240577e-21 | 3 | C3       |
| 3.25173160453568e-25 | 1.98           | 4.49096651902423e-21 | 3 | Mall     |
| 4.99146305511375e-25 | -1.38          | 6.8937096254176e-21  | 3 | Fbn1     |
| 6.46083865725123e-25 | 2.07           | 8.92306426952967e-21 | 3 | S1pr1    |
| 1.10933081474242e-24 | 1.79           | 1.53209678824076e-20 | 3 | Tinagl1  |
| 6.520012324452E-24   | -0.81786121864 | 9.00478902130065e-20 | 3 | Celf2    |
| 1.21706449227417e-23 | 1.82           | 1.68088777027985e-19 | 3 | Cgnl1    |
| 1.55929473087835e-23 | 1.47           | 2.15354195281609e-19 | 3 | Cmip     |
| 1.64719410209989e-23 | 1.58           | 2.27493977441016e-19 | 3 | Crim1    |
| 1.99457659158637e-23 | -1.68          | 2.75470973063994e-19 | 3 | Serpinf1 |
| 2.23206389094672e-23 | -1.15          | 3.08270343978651e-19 | 3 | Dcn      |
| 2.4629455201084e-23  | 2.00           | 3.40157405782171e-19 | 3 | Ehd4     |
| 4.77091391146117e-23 | 2.10           | 6.58910920311902e-19 | 3 | Tal1     |
| 4.82116279829511e-23 | -1.89          | 6.65850794072538e-19 | 3 | C1s1     |
| 8.48276104818996e-23 | 1.29           | 1.17155412836552e-18 | 3 | Gata2    |
| 9.21003583438178e-23 | -1.63          | 1.27199804908647e-18 | 3 | Mfap4    |
| 9.44444070374096e-23 | -1.88          | 1.30437170559366e-18 | 3 | Prx1     |
| 1.36520338880288e-22 | 0.936007785214 | 1.88548240027565e-18 | 3 | H2-K1    |
| 2.1527329884636e-22  | 1.21           | 2.97313953036707e-18 | 3 | Klf2     |
| 3.48264560909106e-22 | 1.10           | 4.80988185071566e-18 | 3 | Cav1     |
| 4.22824276333257e-22 | 2.22           | 5.83962608043861e-18 | 3 | Edn1     |
| 4.36410795830569e-22 | -0.91794328306 | 6.02726950121599e-18 | 3 | Pmp22    |
| 7.64210269442427e-22 | -2.03          | 1.05545080312694e-17 | 3 | Gas1     |
| 1.57113352846282e-21 | -1.73          | 2.16989251616001e-17 | 3 | Olfml2b  |
| 1.62180106207432e-21 | 1.69           | 2.23986944683084e-17 | 3 | Efnb2    |
| 1.76470525273669e-21 | -1.03          | 2.43723442455465e-17 | 3 | Il11ra1  |
| 2.52379026057902e-21 | -2.14          | 3.48560672888568e-17 | 3 | Smoc2    |
| 3.40888301101348e-21 | -1.98          | 4.70800832651072e-17 | 3 | Clec3b   |
| 4.14493601878527e-21 | -1.67          | 5.72457113554434e-17 | 3 | Col14a1  |
| 4.93970048733744e-21 | 2.01           | 6.82222034306174e-17 | 3 | F11r     |
| 5.92859935088154e-21 | -1.68          | 8.18798856350249e-17 | 3 | Igf1     |
| 9.65886112059121e-21 | -1.15          | 1.33398530936485e-16 | 3 | Fgl2     |
| 9.82955374956582e-21 | 1.30           | 1.35755966835254e-16 | 3 | Ramp2    |
| 1.11093336538552e-20 | 1.65           | 1.53431007093393e-16 | 3 | Cbfa2t3  |
| 1.11181265607667e-20 | -1.89          | 1.53552445930749e-16 | 3 | Chpf     |
| 1.20327830532818e-20 | -1.40          | 1.66184766748875e-16 | 3 | Ltbp1    |
| 1.43971683842067e-20 | -1.70          | 1.98839292554279e-16 | 3 | Pdgfra   |

|                      |                |                      |   |         |
|----------------------|----------------|----------------------|---|---------|
| 2.09460625278497e-20 | 1.66           | 2.89286069572133e-16 | 3 | Nrarp   |
| 2.4962249037269e-20  | 1.38           | 3.44753621453722e-16 | 3 | Cav2    |
| 3.8713925833742e-20  | -2.22          | 5.34678029689811e-16 | 3 | Clec11a |
| 4.85455585514658e-20 | -1.59          | 6.70462709154295e-16 | 3 | Gpx3    |
| 5.12823974715413e-20 | -0.96116332200 | 7.08261191479456e-16 | 3 | Cryab   |
| 8.24804365378112e-20 | 2.02           | 1.13913730902371e-15 | 3 | Gprc5a  |
| 8.42944285566817e-20 | -2.18          | 1.16419035279633e-15 | 3 | Dpep1   |
| 1.21482951695128e-19 | 2.23           | 1.67780104586141e-15 | 3 | Rasip1  |
| 1.48204524761628e-19 | -1.71          | 2.04685269148285e-15 | 3 | Bicc1   |
| 1.83504661749812e-19 | -2.07          | 2.53438288342666e-15 | 3 | Scn7a   |
| 1.93575329332622e-19 | -1.84          | 2.67346887341284e-15 | 3 | Aspn    |
| 2.06017934998712e-19 | 2.45           | 2.84531370026721e-15 | 3 | Pkhd1l1 |
| 2.40397409988229e-19 | 2.39           | 3.32012862934743e-15 | 3 | Irf6    |
| 2.53305512829061e-19 | 1.74           | 3.49840243768216e-15 | 3 | Pkn3    |
| 3.53237364473713e-19 | -1.16          | 4.87856124074646e-15 | 3 | Igfbp4  |
| 3.84392486878882e-19 | -1.62          | 5.30884463628424e-15 | 3 | Timp1   |
| 4.89090530729445e-19 | -1.04          | 6.75482931990437e-15 | 3 | Col5a1  |
| 7.67657587152651e-19 | -1.93          | 1.06021189361653e-14 | 3 | Entpd2  |
| 7.76983360670973e-19 | -1.56          | 1.07309171942268e-14 | 3 | Tgfb1   |
| 8.6394608928212e-19  | 1.86           | 1.19319594390754e-14 | 3 | Selp    |
| 8.67857115611944e-19 | 0.73           | 1.19859746237166e-14 | 3 | Fkbp1a  |
| 9.17735789787531e-19 | -1.18          | 1.26748489927556e-14 | 3 | Mrc2    |
| 1.71075744167906e-18 | 2.26           | 2.36272710270295e-14 | 3 | Adh7    |
| 1.71470228814765e-18 | 1.69           | 2.36817533016071e-14 | 3 | Palmd   |
| 2.13033503701755e-18 | -1.73          | 2.94220571962494e-14 | 3 | Rbp4    |
| 2.90356275013354e-18 | 2.05           | 4.01011051420944e-14 | 3 | Gpr116  |
| 5.76271991763903e-18 | -1.26          | 7.95889247825126e-14 | 3 | Sdc2    |
| 5.95007479996884e-18 | -2.03          | 8.21764830623696e-14 | 3 | Ctsk    |
| 7.35015930760727e-18 | -1.20          | 1.01513050197364e-13 | 3 | Atp1a2  |
| 8.43671858753696e-18 | -1.14          | 1.16519520412473e-13 | 3 | Col6a3  |
| 1.14650780467504e-17 | -1.21          | 1.58344192903669e-13 | 3 | Bmp1    |
| 1.26007873076769e-17 | -0.79911134978 | 1.74029473506326e-13 | 3 | Lhfp    |
| 1.35454576360565e-17 | -1.57          | 1.87076315411577e-13 | 3 | Olfml3  |
| 1.59708330802132e-17 | -1.98          | 2.20573175670825e-13 | 3 | Tnfaip6 |
| 2.19470518678882e-17 | 2.01           | 3.03110733347404e-13 | 3 | Sox7    |
| 3.41810580824123e-17 | -1.45          | 4.72074593176197e-13 | 3 | Pdlim2  |
| 4.08181702319292e-17 | 1.22           | 5.63739749073175e-13 | 3 | Anxa3   |
| 4.14351911356024e-17 | -1.80          | 5.72261424773805e-13 | 3 | Cfb     |
| 5.96527989728114e-17 | -2.01          | 8.23864806613498e-13 | 3 | Egfr    |
| 6.38684107576748e-17 | 2.34           | 8.82086620974247e-13 | 3 | Sox17   |
| 6.44990182495634e-17 | -1.49          | 8.9079594104472e-13  | 3 | Prg4    |
| 7.12325948286286e-17 | -0.87141961931 | 9.8379336717819e-13  | 3 | Anxa1   |
| 7.23965513771224e-17 | 1.29           | 9.99868771069437e-13 | 3 | Bmp4    |
| 1.13789456831726e-16 | -2.06          | 1.57154618830297e-12 | 3 | Pdgfr1  |
| 1.27570977605809e-16 | 2.15           | 1.76188277171382e-12 | 3 | Acer2   |
| 1.34748608970819e-16 | 1.78           | 1.86101303849598e-12 | 3 | Gbp4    |
| 1.44098043671262e-16 | 1.89           | 1.9901380811438e-12  | 3 | Stmn2   |
| 1.52374901337825e-16 | 1.09           | 2.10444976237671e-12 | 3 | Dennd5b |
| 1.86546881266354e-16 | -1.33          | 2.57639897716962e-12 | 3 | Efemp2  |
| 1.88390793160991e-16 | -0.84211515154 | 2.60186524434645e-12 | 3 | Plxdc2  |
| 2.34490057605661e-16 | -1.43          | 3.23854218559178e-12 | 3 | Nbl1    |
| 2.85272814149792e-16 | -0.82525673308 | 3.93990283622277e-12 | 3 | Twsg1   |
| 2.88624281989303e-16 | -1.31          | 3.98618995855427e-12 | 3 | Colec12 |
| 3.08233455568548e-16 | 1.35           | 4.25701225485722e-12 | 3 | Nuak1   |
| 3.57983143804717e-16 | -1.77          | 4.94410519908694e-12 | 3 | Akap12  |
| 5.08993656605521e-16 | -2.09          | 7.02971139137884e-12 | 3 | Medag   |



|                      |                |                      |   |          |
|----------------------|----------------|----------------------|---|----------|
| 5.61204542463236e-16 | -1.51          | 7.75079593595975e-12 | 3 | Lsp1     |
| 8.48335758807434e-16 | 1.50           | 1.17163651648895e-11 | 3 | Notch1   |
| 8.5500075839936e-16  | -2.10          | 1.18084154742536e-11 | 3 | Cd248    |
| 9.04489745977248e-16 | 2.05           | 1.24919078816918e-11 | 3 | She      |
| 1.16250340793173e-15 | -1.46          | 1.60553345669452e-11 | 3 | Fat1     |
| 1.21244676289623e-15 | -0.66285342365 | 1.67451022423598e-11 | 3 | Rbms3    |
| 1.3117915520914e-15  | -1.61          | 1.81171531259343e-11 | 3 | Cpxm1    |
| 1.50711916149362e-15 | -1.56          | 2.08148227393884e-11 | 3 | Foxp2    |
| 1.58457996325521e-15 | 2.20           | 2.18846338725177e-11 | 3 | Eltld1   |
| 1.72833226364294e-15 | -1.08          | 2.38699968931727e-11 | 3 | Itgbl1   |
| 1.83802713331651e-15 | -1.37          | 2.53849927382343e-11 | 3 | Hk2      |
| 2.02399683633082e-15 | 1.84           | 2.79534203065649e-11 | 3 | Slc9a3r2 |
| 2.24588023954458e-15 | -1.61          | 3.10178519883501e-11 | 3 | Gfpt2    |
| 2.98445242746807e-15 | -2.08          | 4.12182724757615e-11 | 3 | Scara5   |
| 3.2196297063398e-15  | 0.528058078253 | 4.4466305874259e-11  | 3 | H2-D1    |
| 3.23113967280604e-15 | -1.15          | 4.46252700211242e-11 | 3 | Adamts5  |
| 3.75289792622877e-15 | 1.87           | 5.18312732591455e-11 | 3 | Ccm2l    |
| 4.5231898606733e-15  | -0.82123868469 | 6.2469775165759e-11  | 3 | Fmo2     |
| 4.82950856673396e-15 | -1.39          | 6.67003428151628e-11 | 3 | Col15a1  |
| 5.78762403012245e-15 | 1.11           | 7.99328754800211e-11 | 3 | Sfrp1    |
| 6.43479518845621e-15 | -1.29          | 8.88709563477688e-11 | 3 | C4b      |
| 7.159223722918E-15   | 1.97           | 9.88760388372205e-11 | 3 | Gja4     |
| 7.74290057838221e-15 | -1.44          | 1.06937199888037e-10 | 3 | Igfbp5   |
| 8.04772119076361e-15 | -1.82          | 1.11147077365636e-10 | 3 | Wisp2    |
| 8.93855146295268e-15 | 0.699386264562 | 1.23450334254839e-10 | 3 | Bcam     |
| 1.02419613481172e-14 | 2.06           | 1.41451728178846e-10 | 3 | Amigo2   |
| 1.04804499714476e-14 | -0.78832012584 | 1.44745494555663e-10 | 3 | Gem      |
| 1.06720621986751e-14 | -1.96          | 1.47391851025902e-10 | 3 | Gdf10    |
| 1.11733378111637e-14 | 1.87           | 1.54314968509982e-10 | 3 | Ephx2    |
| 1.2181938897003e-14  | -1.16          | 1.68244758106508e-10 | 3 | Tgfb3    |
| 1.4019074859957e-14  | -1.19          | 1.93617442890866e-10 | 3 | Epb4.1l2 |
| 1.61364779802653e-14 | 2.00           | 2.22860897385444e-10 | 3 | Notch4   |
| 1.74836821447666e-14 | -0.86          | 2.41467134101372e-10 | 3 | Nid1     |
| 1.79866186889614e-14 | 1.63           | 2.48413190713246e-10 | 3 | Clic5    |
| 2.1253212962259e-14  | -1.65          | 2.93528124221759e-10 | 3 | Thbs3    |
| 2.3767279441808e-14  | 2.18           | 3.28249896370811e-10 | 3 | Gcnt1    |
| 2.51153047144619e-14 | -1.46          | 3.46867473411433e-10 | 3 | Wfdc1    |
| 3.02395193917784e-14 | 2.04           | 4.17638002319851e-10 | 3 | Plcg2    |
| 3.29471101138203e-14 | -1.26          | 4.55032537781972e-10 | 3 | Vcan     |
| 3.34563039796163e-14 | -0.79622329881 | 4.6206501426248e-10  | 3 | Oat      |
| 3.69626496396927e-14 | -1.78          | 5.10491154173796e-10 | 3 | Ms4a4d   |
| 3.75944711415037e-14 | -0.97982584427 | 5.19217240935308e-10 | 3 | Gpc6     |
| 3.76369140716645e-14 | -1.33          | 5.19803420243758e-10 | 3 | Vasn     |
| 3.79424059474202e-14 | -0.29389687401 | 5.2402256853982e-10  | 3 | Dpysl3   |
| 4.62231463991222e-14 | 1.52           | 6.38387874918276e-10 | 3 | Heg1     |
| 5.36364057104407e-14 | 1.63           | 7.40772399266896e-10 | 3 | Rnf125   |
| 5.37614900685117e-14 | -1.33          | 7.42499939336216e-10 | 3 | Phlda1   |
| 5.54144114211883e-14 | 1.85           | 7.65328436138032e-10 | 3 | Fam189a2 |
| 5.59362397116906e-14 | -0.63662394870 | 7.72535406658159e-10 | 3 | Rcn3     |
| 6.30687665998222e-14 | -1.37          | 8.71042735510145e-10 | 3 | Col4a5   |
| 6.55400279363317e-14 | -0.89          | 9.05173325828677e-10 | 3 | Pdgfrb   |
| 7.55572439359113e-14 | -1.72          | 1.04352109599887e-09 | 3 | Il33     |
| 7.667279160709E-14   | -1.13          | 1.05892792488552e-09 | 3 | Nr2f2    |
| 8.08523531235479e-14 | 1.43           | 1.11665184898932e-09 | 3 | Shank3   |
| 8.59412467711503e-14 | 1.61           | 1.18693455915636e-09 | 3 | Ptgs1    |
| 9.20541454746521e-14 | -1.40          | 1.27135980315042e-09 | 3 | Ifi27l2a |

|                      |                |                      |   |           |
|----------------------|----------------|----------------------|---|-----------|
| 9.74373952429177e-14 | -2.01          | 1.34570786569994e-09 | 3 | Igfbp6    |
| 1.05613127770462e-13 | -1.34          | 1.45862290763785e-09 | 3 | Arhgef25  |
| 1.08789379101418e-13 | 1.74           | 1.50249011476968e-09 | 3 | Kctd12    |
| 1.12824788098277e-13 | 1.54           | 1.5582231484253e-09  | 3 | Plvap     |
| 1.2097460493912e-13  | -0.57348966456 | 1.67078026881419e-09 | 3 | S100a6    |
| 1.41806094908541e-13 | -1.80          | 1.95848397678186e-09 | 3 | Col16a1   |
| 1.43494700931368e-13 | -1.06          | 1.98180531456312e-09 | 3 | Tspan3    |
| 1.4788344718731e-13  | 0.95919920352  | 2.04241828910394e-09 | 3 | Ctsh      |
| 1.50855567195537e-13 | 2.14           | 2.08346623853757e-09 | 3 | Gkn3      |
| 1.68504362540785e-13 | -0.93          | 2.32721375105078e-09 | 3 | Pkd2      |
| 1.6969988363267e-13  | 1.74           | 2.3437250928508e-09  | 3 | Car8      |
| 1.76083953898246e-13 | -0.43931737909 | 2.43189548728867e-09 | 3 | Sspn      |
| 1.76900471241955e-13 | -1.37          | 2.44317240832264e-09 | 3 | Lpar1     |
| 2.07586021669674e-13 | -0.63611569291 | 2.86697054527987e-09 | 3 | Scsep1    |
| 2.20393635908691e-13 | -1.81          | 3.04385650553493e-09 | 3 | Comp      |
| 2.22086364681913e-13 | -0.72731027654 | 3.0672347826219e-09  | 3 | Ndrp2     |
| 2.29526462356141e-13 | -1.77          | 3.16998997160067e-09 | 3 | Svep1     |
| 2.37568044445467e-13 | -0.77374823854 | 3.28105226183635e-09 | 3 | Oxct1     |
| 2.75465940128779e-13 | -1.09          | 3.80446009911856e-09 | 3 | Lpl       |
| 2.77039790087478e-13 | -1.11          | 3.82619654089816e-09 | 3 | Ebf1      |
| 2.95026830394033e-13 | -0.86949065425 | 4.07461555457199e-09 | 3 | Aldh1a1   |
| 3.4716779434521e-13  | -0.83527491400 | 4.79473440770169e-09 | 3 | Gstm2     |
| 3.80376402588986e-13 | -0.83275677078 | 5.25337849615649e-09 | 3 | Cebpb     |
| 4.04968455857197e-13 | -2.20          | 5.59301934384374e-09 | 3 | Cpxm2     |
| 4.22012941029104e-13 | -0.79045214076 | 5.82842072855296e-09 | 3 | Itgb5     |
| 4.64967012529239e-13 | -0.76554572112 | 6.42165941004133e-09 | 3 | Ppap2b    |
| 5.42059163997447e-13 | 1.51           | 7.48637911396875e-09 | 3 | Cdk17     |
| 5.55425826799567e-13 | -1.34          | 7.67098609392882e-09 | 3 | Slit3     |
| 5.77567815651565e-13 | 1.13           | 7.97678910196377e-09 | 3 | Adam10    |
| 6.10262338379558e-13 | -0.89807781077 | 8.42833315536007e-09 | 3 | Cd44      |
| 6.98470004176676e-13 | -1.70          | 9.64656922768407e-09 | 3 | Igsf10    |
| 7.22900684816177e-13 | 1.75           | 9.98398135799622e-09 | 3 | Casp1     |
| 7.26230312381259e-13 | -0.98116027954 | 1.00299668442976e-08 | 3 | Zeb2      |
| 7.78032973492336e-13 | -1.75          | 1.07454133969027e-08 | 3 | Atf5      |
| 7.7874734262436e-13  | -0.70726511028 | 1.0755279548985e-08  | 3 | Tuba1a    |
| 8.17832714078996e-13 | 1.23           | 1.1295087614145e-08  | 3 | Rab11a    |
| 9.29003276934033e-13 | 1.85           | 1.28304642577359e-08 | 3 | Gpr56     |
| 9.54201836517368e-13 | 1.93           | 1.31784815641414e-08 | 3 | Klk8      |
| 1.11288291597737e-12 | -1.50          | 1.53700259525634e-08 | 3 | F3        |
| 1.22915758987145e-12 | -1.63          | 1.69758954737147e-08 | 3 | Sfrp2     |
| 1.27158976150332e-12 | 0.988786206792 | 1.75619261961223e-08 | 3 | Etna5     |
| 1.33371921004774e-12 | -1.02          | 1.84199960099694e-08 | 3 | Serpina3n |
| 1.34786091673455e-12 | 1.61           | 1.86153071210209e-08 | 3 | Dll1      |
| 1.58375308455001e-12 | 1.32           | 2.18732138507202e-08 | 3 | Hhex      |
| 1.59064137606441e-12 | -1.52          | 2.19683480448256e-08 | 3 | Pi16      |
| 1.66944180374057e-12 | -1.00          | 2.3056660751461e-08  | 3 | Sh3d19    |
| 1.97736068090283e-12 | -0.70896023540 | 2.7309328363949e-08  | 3 | Fkbp7     |
| 2.1995595551403e-12  | 2.17           | 3.03781170212043e-08 | 3 | Klk10     |
| 2.21435513656697e-12 | -0.54450421651 | 3.05824587911265e-08 | 3 | Osr1      |
| 2.27832167393434e-12 | -1.81          | 3.14659006387072e-08 | 3 | Srpx      |
| 2.31076432684077e-12 | -0.85884834718 | 3.19139661179978e-08 | 3 | Ecm2      |
| 2.33982380366241e-12 | -0.66          | 3.23153065523815e-08 | 3 | Lmo4      |
| 2.56954363176547e-12 | 0.983490213684 | 3.54879670983129e-08 | 3 | Ptprj     |
| 2.61917370340273e-12 | 0.714010117019 | 3.61734080176951e-08 | 3 | Myl12b    |
| 2.77923815879107e-12 | -0.69895641331 | 3.83840582110634e-08 | 3 | Ckap4     |
| 2.93093898180411e-12 | -1.57          | 4.04791982776965e-08 | 3 | C7        |

|                      |                |                      |   |            |
|----------------------|----------------|----------------------|---|------------|
| 4.0331686047234e-12  | 0.917606489007 | 5.57020915998349e-08 | 3 | Pgm5       |
| 4.50568477570496e-12 | 1.88           | 6.22280124372612e-08 | 3 | Myzap      |
| 4.58279187008913e-12 | -0.70584142888 | 6.3292938517801e-08  | 3 | Ccdc80     |
| 5.02032207758128e-12 | 1.14           | 6.9335668213475e-08  | 3 | Flnb       |
| 5.10129406276913e-12 | 1.34           | 7.04539723009045e-08 | 3 | Exoc6      |
| 5.25290687465165e-12 | -0.94711028191 | 7.25478968458139e-08 | 3 | Lgals3bp   |
| 5.4360043685962e-12  | 2.10           | 7.50766563346821e-08 | 3 | Gimap4     |
| 5.68530858852978e-12 | 2.10           | 7.85197969161847e-08 | 3 | Prkch      |
| 6.18364735751314e-12 | 1.75           | 8.5402353654614e-08  | 3 | Fzd6       |
| 7.12524088429511e-12 | 1.42           | 9.84067018529998e-08 | 3 | Slco2a1    |
| 7.72422167901861e-12 | 2.20           | 1.06679225608926e-07 | 3 | Lsr        |
| 7.7575230326369e-12  | -1.46          | 1.07139150603748e-07 | 3 | Xdh        |
| 8.08163412904576e-12 | 0.861150932471 | 1.11615448956251e-07 | 3 | Myh9       |
| 8.14288425776762e-12 | -0.99777927573 | 1.12461374484029e-07 | 3 | Igsf3      |
| 9.53636727238451e-12 | 1.47           | 1.31706768398902e-07 | 3 | Tspan14    |
| 9.92473031692584e-12 | -1.34          | 1.37070450407063e-07 | 3 | Hspb8      |
| 1.10451248903288e-11 | 1.67           | 1.52544219860332e-07 | 3 | Adh1       |
| 1.24811466170098e-11 | -1.19          | 1.72377115927523e-07 | 3 | Cxcl1      |
| 1.53237093764141e-11 | -0.94159225140 | 2.11635750197655e-07 | 3 | Fcgrt      |
| 1.55604278802618e-11 | -0.80588518213 | 2.14905069454296e-07 | 3 | Mmp14      |
| 1.93348930645989e-11 | -1.65          | 2.67034208115176e-07 | 3 | Thbs2      |
| 2.11874756475235e-11 | -0.63444064192 | 2.92620226167946e-07 | 3 | Gas6       |
| 2.20728852209941e-11 | 1.53           | 3.04848617787149e-07 | 3 | Sox13      |
| 2.28024617216735e-11 | 1.52           | 3.14924798838032e-07 | 3 | Arhgap31   |
| 2.33372863144609e-11 | -0.65504101183 | 3.2231126128902e-07  | 3 | Ctsl       |
| 2.3671554337898e-11  | -0.77          | 3.26927836960709e-07 | 3 | Pde5a      |
| 2.39099957131292e-11 | 0.786889498501 | 3.30220950794028e-07 | 3 | Ablim1     |
| 2.44409276525992e-11 | -1.11          | 3.37553651810048e-07 | 3 | Gja1       |
| 2.52361633336314e-11 | -0.55207483176 | 3.48536651800784e-07 | 3 | Selm       |
| 2.776891561443E-11   | -1.74          | 3.83516493550893e-07 | 3 | Matn2      |
| 2.85185959021311e-11 | 0.85           | 3.93870328004332e-07 | 3 | Vcam1      |
| 2.88331900199411e-11 | -1.13          | 3.98215187365407e-07 | 3 | Ugdh       |
| 3.26622414293985e-11 | 2.07           | 4.51098216381422e-07 | 3 | Arap3      |
| 3.54518395316291e-11 | -1.19          | 4.89625355771329e-07 | 3 | Fam102b    |
| 3.68958993496711e-11 | -0.75558873564 | 5.09569265918307e-07 | 3 | Serpine2   |
| 3.85464863433122e-11 | -1.58          | 5.32365522887485e-07 | 3 | Mmp3       |
| 3.93780426701941e-11 | -0.36479234181 | 5.43850147318051e-07 | 3 | Rhoq       |
| 4.37202531188709e-11 | -0.71885381131 | 6.03820415824726e-07 | 3 | C1ra       |
| 4.63135511456096e-11 | -0.92110668541 | 6.39636454872015e-07 | 3 | Fam46a     |
| 4.89785254227561e-11 | -1.59          | 6.76442414613684e-07 | 3 | Mlec       |
| 4.90676907897248e-11 | -1.53          | 6.7767387749689e-07  | 3 | Dnm1       |
| 5.14395353218984e-11 | 1.65           | 7.10431422330738e-07 | 3 | Dhh        |
| 5.46657304006886e-11 | -1.84          | 7.54988402563911e-07 | 3 | Gpr133     |
| 5.48754779367277e-11 | -1.01          | 7.57885225784147e-07 | 3 | Fam114a1   |
| 5.67435992462045e-11 | 0.49           | 7.83685849189331e-07 | 3 | Rhob       |
| 6.92103627300865e-11 | -0.52460798763 | 9.55864319665224e-07 | 3 | Nenf       |
| 6.97014900731369e-11 | -1.26          | 9.62647279400094e-07 | 3 | Slc6a6     |
| 7.23469665261078e-11 | -0.71          | 9.99183954692074e-07 | 3 | Herpud1    |
| 7.75512886940166e-11 | -1.08          | 1.07106084815306e-06 | 3 | Adamtsl3   |
| 8.35019129418981e-11 | -1.62          | 1.15324491964055e-06 | 3 | Il6        |
| 8.48378231711927e-11 | -1.22          | 1.17169517581734e-06 | 3 | 1700025G04 |
| 9.20693511075453e-11 | -1.98          | 1.27156980814631e-06 | 3 | Inmt       |
| 9.39006437319387e-11 | -0.64779936320 | 1.29686179058181e-06 | 3 | Mfap5      |
| 1.05767471984879e-10 | -0.74876826035 | 1.46075455558317e-06 | 3 | Tmed3      |
| 1.23477619981459e-10 | 1.31           | 1.70534940956392e-06 | 3 | Plxnd1     |
| 1.25327637078346e-10 | -0.82333193093 | 1.73089999568904e-06 | 3 | Errfi1     |

|                      |                |                      |   |             |
|----------------------|----------------|----------------------|---|-------------|
| 1.27714623019406e-10 | -2.05          | 1.76386665852101e-06 | 3 | Fmod        |
| 1.34512035770067e-10 | -0.54016960418 | 1.85774572602039e-06 | 3 | Snhg18      |
| 1.35274575644332e-10 | 1.89           | 1.86827716422387e-06 | 3 | C130074G19  |
| 1.42838778108575e-10 | -0.74467989628 | 1.97274636445752e-06 | 3 | Mmp2        |
| 1.6926337300341e-10  | -1.72          | 2.33769644455009e-06 | 3 | Naalad2     |
| 1.78057505483544e-10 | -0.74030785687 | 2.45915220823322e-06 | 3 | Lamc1       |
| 1.79656911970828e-10 | -0.79          | 2.4812416112291e-06  | 3 | Pi15        |
| 1.92692217704255e-10 | -1.72          | 2.66127221871346e-06 | 3 | Gabra3      |
| 2.0813361735986e-10  | -0.91674819908 | 2.87453338935703e-06 | 3 | Cxcl12      |
| 2.21085015105895e-10 | -1.10          | 3.05340514362751e-06 | 3 | Runx1t1     |
| 2.35621507841156e-10 | 1.35           | 3.25416864479421e-06 | 3 | Adra2a      |
| 3.03358744105545e-10 | -1.32          | 4.18968761484168e-06 | 3 | Man2a2      |
| 3.08388691757223e-10 | 1.43           | 4.25915622185901e-06 | 3 | Fgd5        |
| 3.12493473880964e-10 | 1.36           | 4.31584736776999e-06 | 3 | Ptpm        |
| 3.14544226327936e-10 | -1.58          | 4.34417030981513e-06 | 3 | Pice1       |
| 3.18461462011043e-10 | 1.01           | 4.39827125183451e-06 | 3 | Smad6       |
| 3.22716549078174e-10 | 0.58           | 4.45703825931866e-06 | 3 | Ctnnb1      |
| 3.58893565785394e-10 | -1.21          | 4.95667903706208e-06 | 3 | Mpp6        |
| 3.63985361645101e-10 | 1.48           | 5.02700182968049e-06 | 3 | Ctla2a      |
| 3.82236448365243e-10 | -0.73183328692 | 5.27906758837237e-06 | 3 | Mpc2        |
| 4.04153177034746e-10 | -0.60498579846 | 5.58175952802687e-06 | 3 | Rnase4      |
| 4.0834640485468e-10  | 1.10           | 5.63967219744799e-06 | 3 | Spon1       |
| 4.19342384538305e-10 | -0.80024495758 | 5.79153767285853e-06 | 3 | Pmp         |
| 4.45510050461925e-10 | -1.16          | 6.15293930692965e-06 | 3 | Pid1        |
| 4.79043423725474e-10 | -1.68          | 6.61606872507252e-06 | 3 | Adamts15    |
| 5.03526452550877e-10 | -0.58355182600 | 6.95420383618016e-06 | 3 | Mxra8       |
| 5.15379543179222e-10 | -0.85955400568 | 7.11790687084824e-06 | 3 | Antxr1      |
| 5.64199115155969e-10 | -1.55          | 7.79215397941909e-06 | 3 | Steap4      |
| 5.64417126656551e-10 | 1.36           | 7.79516493625362e-06 | 3 | Mkl2        |
| 5.80242086521009e-10 | 1.14           | 8.01372345694166e-06 | 3 | Serpinb6b   |
| 6.34364120523796e-10 | -0.83974507428 | 8.76120286855414e-06 | 3 | Gstm5       |
| 6.68187059427746e-10 | -1.84          | 9.22833147775659e-06 | 3 | Dact1       |
| 6.89191337253384e-10 | -0.69616135655 | 9.51842155880649e-06 | 3 | Zcchc24     |
| 7.2093045339196e-10  | -0.46838304317 | 9.95677049179636e-06 | 3 | Timp2       |
| 7.31769699350625e-10 | -0.68507509301 | 1.01064713177315e-05 | 3 | Mpdz        |
| 7.73889559614134e-10 | 1.57           | 1.06881887078308e-05 | 3 | Myrip       |
| 8.03703095403004e-10 | 1.17           | 1.10999434506109e-05 | 3 | Cd2ap       |
| 8.19161705103629e-10 | 0.881328559425 | 1.13134423091862e-05 | 3 | Cdh13       |
| 8.38055912119714e-10 | -1.27          | 1.15743902022854e-05 | 3 | Mmp19       |
| 8.45122840138891e-10 | -1.37          | 1.16719915451582e-05 | 3 | Itih5       |
| 8.48820445381671e-10 | -0.77589899148 | 1.17230591711663e-05 | 3 | Mdh1        |
| 8.89467726274861e-10 | 1.44           | 1.22844387675821e-05 | 3 | Tspan6      |
| 9.08657683223451e-10 | 0.938269291312 | 1.25494712629991e-05 | 3 | Efcab4a     |
| 1.01202236318096e-09 | -1.63          | 1.39770408578923e-05 | 3 | Gpm6b       |
| 1.04686303317291e-09 | -0.68038425006 | 1.4458225351151e-05  | 3 | 4930523C07I |
| 1.05602023293769e-09 | -1.30          | 1.45846954371024e-05 | 3 | Fstl3       |
| 1.09094359000387e-09 | -0.76179337150 | 1.50670219215435e-05 | 3 | Lrrc61      |
| 1.09982994636193e-09 | -0.34451730822 | 1.51897513892046e-05 | 3 | Atp6v0b     |
| 1.10108077636093e-09 | 1.24           | 1.52070266023207e-05 | 3 | Nt5e        |
| 1.13901343174251e-09 | -0.57686393501 | 1.57309145057958e-05 | 3 | Nptn        |
| 1.1454724522377e-09  | -0.33238851859 | 1.58201200378549e-05 | 3 | Ctsb        |
| 1.20188312334157e-09 | -0.63865143515 | 1.65992078164705e-05 | 3 | Cnpy2       |
| 1.20819562798874e-09 | -1.61          | 1.66863898181525e-05 | 3 | Abca9       |
| 1.22399319888888e-09 | -1.57          | 1.69045700698543e-05 | 3 | Qpct        |
| 1.41476975437829e-09 | -0.42745095050 | 1.95393850777185e-05 | 3 | Map1lc3a    |
| 1.54385454590377e-09 | -0.95166213393 | 2.13221751334769e-05 | 3 | Papss2      |



|                      |                |                      |   |          |
|----------------------|----------------|----------------------|---|----------|
| 1.60804018181232e-09 | 1.63           | 2.22086429510099e-05 | 3 | Rasgrf2  |
| 1.62509888863042e-09 | -1.30          | 2.24442407508747e-05 | 3 | C1qtnf7  |
| 1.65703314803997e-09 | -2.00          | 0.00                 | 3 | C2       |
| 1.67457036674519e-09 | 0.540761938975 | 2.31274913351179e-05 | 3 | Serinc3  |
| 1.75813585978035e-09 | 1.35           | 2.42816143594265e-05 | 3 | Il15     |
| 1.9133840068177e-09  | -0.60190523872 | 2.64257465181593e-05 | 3 | Bloc1s1  |
| 1.92912474156719e-09 | -1.47          | 2.66431418057844e-05 | 3 | Gpnmb    |
| 1.93416365627876e-09 | -0.79720027317 | 2.6712734256866e-05  | 3 | Adamtsl5 |
| 2.10342138005242e-09 | 2.11           | 2.9050352679904e-05  | 3 | Klhl6    |
| 2.16348809716719e-09 | 1.71           | 2.9879934109976e-05  | 3 | Calcr1   |
| 2.41782432555823e-09 | -0.85861127870 | 3.33925717602847e-05 | 3 | Add3     |
| 2.49187233017785e-09 | 1.51           | 3.44152487520863e-05 | 3 | Tmem2    |
| 2.49408889295765e-09 | -1.32          | 3.44458617006381e-05 | 3 | Slc7a2   |
| 2.52331024182156e-09 | -1.40          | 3.48494377497975e-05 | 3 | Cimp     |
| 2.56242567847724e-09 | 1.23           | 3.53896610454492e-05 | 3 | Tspan7   |
| 2.62729820037578e-09 | -0.52202299575 | 0.00                 | 3 | Lamb2    |
| 2.63074850099891e-09 | 0.934569259046 | 3.6333267547296e-05  | 3 | Lpar6    |
| 2.76340887533586e-09 | -1.46          | 3.81654399772636e-05 | 3 | Tmem119  |
| 2.98480125731938e-09 | -0.77290702779 | 4.1223090164838e-05  | 3 | Cped1    |
| 3.06855791968202e-09 | -0.75          | 4.23798534287284e-05 | 3 | Rora     |
| 3.11935569768653e-09 | -0.64292514855 | 4.30814215407487e-05 | 3 | Glis2    |
| 3.12421417738204e-09 | 1.52           | 4.31485220038234e-05 | 3 | Krt18    |
| 3.43363119447711e-09 | -1.65          | 4.74218804269234e-05 | 3 | Dio2     |
| 3.49622925145394e-09 | 0.77           | 4.82864221918304e-05 | 3 | Cdc42ep3 |
| 3.56275210951915e-09 | -1.02          | 4.9205169384569e-05  | 3 | Tcea3    |
| 3.62158413385333e-09 | -0.50054455612 | 5.00176984726483e-05 | 3 | Meg3     |
| 3.74757633920539e-09 | 1.91           | 5.17577768207657e-05 | 3 | Rgs3     |
| 3.75106929798625e-09 | -1.95          | 5.1806018074488e-05  | 3 | Tmem100  |
| 3.92816053234046e-09 | -0.63374232417 | 5.4251825112154e-05  | 3 | Vkorc1   |
| 4.00498609772854e-09 | -1.27          | 5.53128629957288e-05 | 3 | Lbp      |
| 4.04382163556475e-09 | 0.835055097876 | 5.58492206087848e-05 | 3 | Fxyd5    |
| 4.33080517704585e-09 | -1.54          | 5.98127503001802e-05 | 3 | Lrrc17   |
| 4.52543767810985e-09 | 1.95           | 6.25008197723751e-05 | 3 | Gimap6   |
| 4.55004502506126e-09 | -0.95636813668 | 6.28406718411211e-05 | 3 | Sema3c   |
| 4.55615709620826e-09 | -0.43253355645 | 6.29250856557323e-05 | 3 | Gm2a     |
| 4.63782822249888e-09 | -1.22          | 6.40530455809321e-05 | 3 | Rab34    |
| 4.65307161855069e-09 | 0.428896065649 | 6.42635721238036e-05 | 3 | Rps3     |
| 4.87512280231363e-09 | -1.03          | 6.73303210227536e-05 | 3 | H6pd     |
| 4.90206110959841e-09 | 1.68           | 6.77023659846636e-05 | 3 | Adcy4    |
| 4.91646865786623e-09 | -1.62          | 6.79013486337905e-05 | 3 | Hsd11b1  |
| 4.94548023102449e-09 | -0.61944187222 | 6.83020274706792e-05 | 3 | Dlc1     |
| 5.08148809847723e-09 | -0.43          | 7.0180432128069e-05  | 3 | Fuca1    |
| 5.254191739646E-09   | -0.47953358780 | 7.25656421162509e-05 | 3 | Csrp2    |
| 5.61076274291713e-09 | -0.40876755442 | 7.74902442424284e-05 | 3 | Cebpd    |
| 5.63094105874563e-09 | -0.79496321201 | 7.77689269623359e-05 | 3 | Ctdsp2   |
| 6.10532881363949e-09 | -1.00          | 8.43206962451751e-05 | 3 | Slc12a4  |
| 6.4865543106961e-09  | -0.59410255357 | 8.95858015850239e-05 | 3 | Sod2     |
| 6.55449528533465e-09 | -0.75897884671 | 9.05241343857569e-05 | 3 | Fnip1    |
| 6.68496868740438e-09 | -1.50          | 9.23261025417419e-05 | 3 | Thy1     |
| 6.84450267708572e-09 | -0.62579710211 | 9.45294264732309e-05 | 3 | Plod2    |
| 7.0373285634008e-09  | 1.96           | 9.71925447891285e-05 | 3 | Arhgef15 |
| 7.4180541405259e-09  | -1.21          | 0.000102450745734803 | 3 | Sox9     |
| 7.56765928246305e-09 | -0.85082009682 | 0.000104516942350097 | 3 | Creb3l1  |
| 7.62470952737671e-09 | -1.34          | 0.0001053048632826   | 3 | Pamr1    |
| 8.42025667199106e-09 | -1.75          | 0.000116292164896868 | 3 | Lamc3    |
| 8.4763241157822e-09  | 1.34           | 0.000117066512363068 | 3 | Dennd3   |



|                      |                |                      |   |             |
|----------------------|----------------|----------------------|---|-------------|
| 8.52083540876338e-09 | -0.91337225394 | 0.000117681257830431 | 3 | Slc16a2     |
| 8.58059666050473e-09 | 0.365516248467 | 0.000118506620478231 | 3 | Cpe         |
| 9.17276047854630e-09 | -1.54          | 0.000126684994969203 | 3 | Adcy7       |
| 9.24058852784127e-09 | -1.69          | 0.000127621768158016 | 3 | Fbln7       |
| 1.01763090958138e-08 | 1.12           | 0.000140545004922285 | 3 | Sema3f      |
| 1.11231557254994e-08 | 1.65           | 0.000153621903724872 | 3 | Enpp6       |
| 1.1376093002268e-08  | -0.68047502500 | 0.000157115220454323 | 3 | Ckb         |
| 1.1417053703243e-08  | -0.60351823501 | 0.000157680928695489 | 3 | Hexa        |
| 1.15456093353301e-08 | -0.73289718342 | 0.000159456410530244 | 3 | Zak         |
| 1.17141891331694e-08 | -0.69          | 0.000161784666118203 | 3 | Tnxb        |
| 1.33856094201238e-08 | 1.63           | 0.00018486865170133  | 3 | Lmo7        |
| 1.34690063116316e-08 | -0.66630634140 | 0.000186020446169944 | 3 | Nox4        |
| 1.37306033017165e-08 | 1.20           | 0.000189633362200006 | 3 | Fli1        |
| 1.46215673096357e-08 | -0.68          | 0.000201938466113379 | 3 | Tnfrsf12a   |
| 1.47188553668271e-08 | -0.95137672633 | 0.000203282111471249 | 3 | Prickle1    |
| 1.47754650571196e-08 | -0.86449954484 | 0.000204063947903879 | 3 | Atp6v0d1    |
| 1.49291214888795e-08 | -1.06          | 0.000206186096882915 | 3 | Kdelr3      |
| 1.58771011235091e-08 | -2.13          | 0.000219278643616784 | 3 | Heyl        |
| 1.65454382853986e-08 | -0.99          | 0.00022850904815964  | 3 | Prss23      |
| 1.65828325754415e-08 | 0.734506354527 | 0.000229025500699423 | 3 | Ace         |
| 1.66508942170318e-08 | -0.51986786348 | 0.000229965500031426 | 3 | Kank2       |
| 1.75336495468353e-08 | -0.48          | 0.000242157233891342 | 3 | Mrpl52      |
| 1.76466330175947e-08 | -0.67510204573 | 0.000243717648606    | 3 | Gprc5b      |
| 1.80277781293366e-08 | -1.08          | 0.000248981643744268 | 3 | Adarb1      |
| 1.85664860045107e-08 | 1.57           | 0.000256421738208298 | 3 | Kank3       |
| 1.94120166896913e-08 | -1.50          | 0.000268099362501326 | 3 | Dtx4        |
| 1.98561257900111e-08 | 1.87           | 0.000274232953285844 | 3 | Golm1       |
| 2.11213610355615e-08 | 1.24           | 0.000291707117262141 | 3 | 4931406P16f |
| 2.14170953050818e-08 | -1.03          | 0.000295791503258484 | 3 | Samd4       |
| 2.17748654113235e-08 | -1.43          | 0.000300732666195789 | 3 | C1qtnf2     |
| 2.20168257218997e-08 | 1.13           | 0.000304074380045157 | 3 | Elk3        |
| 2.23573958469129e-08 | -1.67          | 0.000308777994041714 | 3 | Apod        |
| 2.29560192689514e-08 | -0.61161558777 | 0.000317045582123488 | 3 | Tmem106b    |
| 2.30263438419581e-08 | -0.47576261731 | 0.000318016834801283 | 3 | Sec61b      |
| 2.31726981343746e-08 | -1.02          | 0.000320038133933848 | 3 | Igsf8       |
| 2.63133798354895e-08 | 2.04           | 0.000363414088907946 | 3 | Tspan13     |
| 2.65482061591742e-08 | -1.26          | 0.000366657275264354 | 3 | Pdpm        |
| 2.70957821845427e-08 | 2.35           | 0.00037421984775072  | 3 | Coch        |
| 2.72420327138587e-08 | -0.87222018744 | 0.000376239713811103 | 3 | Sept8       |
| 2.85997728338005e-08 | -1.48          | 0.000394991462607618 | 3 | Ssc5d       |
| 2.87913734952404e-08 | 0.519000231332 | 0.000397637659342765 | 3 | Hid1        |
| 2.91306159218232e-08 | 0.959403657079 | 0.0004023229364963   | 3 | Eng         |
| 2.93153042480962e-08 | 1.27           | 0.000404873666970457 | 3 | Hoxa5       |
| 2.94404844667782e-08 | 1.08           | 0.000406602530970674 | 3 | Atp2a3      |
| 3.01892504171806e-08 | -1.36          | 0.000416943737511682 | 3 | Kcnj8       |
| 3.07186976420405e-08 | -0.78253199757 | 0.000424255933134221 | 3 | Mfap2       |
| 3.08035366647931e-08 | -0.98620354743 | 0.000425427644877457 | 3 | Rnd3        |
| 3.31384294871101e-08 | -0.76108086702 | 0.000457674849646478 | 3 | Sec24d      |
| 3.60574787535124e-08 | -0.56649039297 | 0.00049798983906476  | 3 | Hivep2      |
| 3.75931074061067e-08 | -0.54565861982 | 0.000519198406385739 | 3 | Ergic3      |
| 3.80081543924394e-08 | 0.557919160784 | 0.00052493062031398  | 3 | Crip2       |
| 3.810753301274E-08   | -0.84290388494 | 0.000526303138438952 | 3 | Ptprd       |
| 3.86158710635399e-08 | 0.40           | 0.00053332379525855  | 3 | Aplp2       |
| 3.94877499667478e-08 | -1.25          | 0.000545365314790754 | 3 | Stk17b      |
| 3.95612624179052e-08 | -0.61478026621 | 0.000546380595253689 | 3 | Uqcc2       |
| 4.01415419254514e-08 | -1.72          | 0.000554394835532409 | 3 | Ccl7        |

|                      |                |                      |   |          |
|----------------------|----------------|----------------------|---|----------|
| 4.13794212911411e-08 | -1.51          | 0.000571491187451949 | 3 | Gas7     |
| 4.17967849476534e-08 | -0.38          | 0.000577255396912041 | 3 | Cox7b    |
| 4.30617219305939e-08 | -0.42351361841 | 0.000594725441583432 | 3 | Cd63     |
| 4.313882406389E-08   | -0.54          | 0.000595790299146384 | 3 | Ugp2     |
| 4.37168835751541e-08 | -0.60864428776 | 0.000603773879056454 | 3 | Dnajc3   |
| 4.65456664043361e-08 | -0.28534728375 | 0.000642842198710285 | 3 | Fth1     |
| 4.73233638743419e-08 | -0.59587323452 | 0.000653582978468535 | 3 | Pfkp     |
| 4.75602332556109e-08 | -1.66          | 0.000656854381493242 | 3 | Aff3     |
| 4.85518409813417e-08 | -0.38272411911 | 0.00067054947579331  | 3 | Gucy1a3  |
| 4.86636962321899e-08 | -0.31073810196 | 0.000672094308662775 | 3 | Arhgap21 |
| 5.01272347077704e-08 | -0.46402845895 | 0.000692307238549017 | 3 | Lamp2    |
| 5.01377116560317e-08 | 1.40           | 0.000692451935681454 | 3 | Fgfr3    |
| 5.10018257701881e-08 | 0.950129037883 | 0.000704386215712069 | 3 | Sgk1     |
| 5.17138500137105e-08 | -0.75027041060 | 0.000714219982539356 | 3 | Crebbp   |
| 5.4737291325756e-08  | -0.40591106856 | 0.000755976730500016 | 3 | Gns      |
| 5.55522761256663e-08 | -0.62362599966 | 0.000767232485571577 | 3 | Chchd1   |
| 5.56936556721021e-08 | -0.67740687057 | 0.000769185078487402 | 3 | Polr2f   |
| 6.21532731985999e-08 | -0.53678240602 | 0.000858398856145863 | 3 | Anapc13  |
| 6.22291020351362e-08 | -0.69601576263 | 0.000859446128207266 | 3 | Ltbp2    |
| 6.30921533833752e-08 | 1.49           | 0.000871365730377795 | 3 | Procr    |
| 6.98100490606589e-08 | -0.30274539117 | 0.000964146587576761 | 3 | Sparc    |
| 7.02171061720788e-08 | -1.08          | 0.00096976845334258  | 3 | Ank2     |
| 7.19014918630726e-08 | -1.12          | 0.000993031504120896 | 3 | Pcsk6    |
| 8.10572520555042e-08 | 1.99           | 0.00111948170813857  | 3 | Sp100    |
| 8.30346968331779e-08 | -0.28669237165 | 0.00114679219796302  | 3 | Cstb     |
| 8.39276255099266e-08 | -0.34159467009 | 0.0011591244359176   | 3 | Egr1     |
| 8.48684115614589e-08 | -0.41728768796 | 0.00117211763207531  | 3 | Reep5    |
| 8.533702648752E-08   | -0.55100853619 | 0.00117858967281914  | 3 | Tmem45a  |
| 9.95545744757898e-08 | -0.58273712373 | 0.00137494822808513  | 3 | Ilk      |
| 1.01750949826698e-07 | -1.30          | 0.00140528236805652  | 3 | Tppp3    |
| 1.02691882682566e-07 | -1.40          | 0.00141827759172892  | 3 | Ccl19    |
| 1.03287550230629e-07 | -0.99          | 0.00142650435623522  | 3 | Arl3     |
| 1.04825595993759e-07 | -1.54          | 0.00144774630626981  | 3 | Ntf3     |
| 1.06483635487588e-07 | -0.64764243043 | 0.00147064548971908  | 3 | Apoa1bp  |
| 1.13357756210105e-07 | -0.53485990135 | 0.00156558397101776  | 3 | Nfkb1    |
| 1.1382695999036e-07  | -1.63          | 0.00157206414442687  | 3 | Sfrp4    |
| 1.2087753981514e-07  | -1.08          | 0.0016694397023869   | 3 | Ndufa4l2 |
| 1.2184024809963e-07  | -0.48115474061 | 0.00168273566650399  | 3 | Mrpl33   |
| 1.33549021417587e-07 | -0.41390841765 | 0.0018444455347983   | 3 | Mia3     |
| 1.34013143129861e-07 | -0.58232101276 | 0.00185085551976651  | 3 | C1qtnf1  |
| 1.34248925030807e-07 | -0.33846288553 | 0.00185411190360047  | 3 | Fkbp10   |
| 1.34514033438776e-07 | -0.73581788510 | 0.00185777331582294  | 3 | Fzd1     |
| 1.35074393476133e-07 | 0.772215092059 | 0.00186551244829887  | 3 | Ly6c1    |
| 1.36840997252641e-07 | -1.30          | 0.00188991101305623  | 3 | Zfp703   |
| 1.50421910556771e-07 | -1.46          | 0.00207747700669957  | 3 | Col4a6   |
| 1.57322137451671e-07 | 2.04           | 0.00217277604034503  | 3 | Ptprr    |
| 1.57349281346479e-07 | -0.36577566479 | 0.00217315092467622  | 3 | Sod3     |
| 1.60692715720368e-07 | -1.77          | 0.002219327096814    | 3 | Has1     |
| 1.62087751722176e-07 | -1.38          | 0.00223859393903498  | 3 | Fgf7     |
| 1.64516503380073e-07 | 1.18           | 0.00227213742818218  | 3 | Dock9    |
| 1.66205933819028e-07 | 1.35           | 0.00229547015197459  | 3 | Etl4     |
| 1.68388062068562e-07 | 1.15           | 0.00232560752522891  | 3 | Cenpt    |
| 1.71319029543141e-07 | 1.09           | 0.00236608711702032  | 3 | Mgst3    |
| 1.7633714167896e-07  | -1.18          | 0.00243539226372811  | 3 | Slc44a1  |
| 1.87835622481756e-07 | -1.91          | 0.00259419778209553  | 3 | Gpc3     |
| 1.88020405427552e-07 | 1.76           | 0.00259674981935992  | 3 | Isl1     |

|                      |                |                     |   |             |
|----------------------|----------------|---------------------|---|-------------|
| 1.9824345820685e-07  | -0.43590238946 | 0.00273794040129481 | 3 | Ywhaq       |
| 1.98861379676883e-07 | -1.45          | 0.00274647451471743 | 3 | Meox2       |
| 1.99117275338981e-07 | -1.45          | 0.00275000868970666 | 3 | Prrx2       |
| 2.17324279748321e-07 | -1.45          | 0.00300146562760406 | 3 | Dse         |
| 2.1993234094907e-07  | -0.82771092709 | 0.00303748556084761 | 3 | Loxl2       |
| 2.35188299328028e-07 | 0.532143783878 | 0.00324818560201939 | 3 | Tpm3        |
| 2.35692740553592e-07 | 0.73           | 0.00325515243978566 | 3 | Ifngr1      |
| 2.37138724833895e-07 | -1.45          | 0.00327512292868093 | 3 | Fam26e      |
| 2.50900551847476e-07 | -0.74638474615 | 0.00346518752156549 | 3 | Anxa4       |
| 2.51160583205127e-07 | -0.55019360551 | 0.00346877881464601 | 3 | Tmem43      |
| 2.64303447488342e-07 | -0.77689891343 | 0.00365029491326149 | 3 | Boc         |
| 2.68917964068718e-07 | -0.61467452636 | 0.00371402600175306 | 3 | Camk2n1     |
| 2.69248541263759e-07 | 1.34           | 0.00371859160339377 | 3 | Arhgdib     |
| 2.7224185653329e-07  | -1.65          | 0.00375993228058127 | 3 | Bmper       |
| 2.85708890130361e-07 | -0.92574805143 | 0.00394592548159042 | 3 | Penk        |
| 2.89019687685994e-07 | -0.82674879944 | 0.00399165090663126 | 3 | Daam1       |
| 2.97335825422316e-07 | -0.61731478048 | 0.00410650508490761 | 3 | Nudt9       |
| 3.07480712357511e-07 | 1.23           | 0.00424661611836958 | 3 | Plxna2      |
| 3.12001255214288e-07 | -0.99320672710 | 0.00430904933576453 | 3 | Alcam       |
| 3.20332225193215e-07 | -0.70          | 0.00442410836214349 | 3 | Ccdc107     |
| 3.35455017871336e-07 | -0.51282666831 | 0.00463296925182102 | 3 | Copz2       |
| 3.37907099180342e-07 | -0.41792918295 | 0.0046668349467797  | 3 | Bmpr1a      |
| 3.45378577381418e-07 | 1.02           | 0.00477002353221477 | 3 | Dock6       |
| 3.4560888603352e-07  | 0.68526523850  | 0.00477320432500894 | 3 | Nrp1        |
| 3.46923003250044e-07 | -0.33830975789 | 0.00479135359788635 | 3 | Tenm3       |
| 3.51092338614259e-07 | -1.61          | 0.00484893628860153 | 3 | Clip4       |
| 3.58844001431229e-07 | -0.90293462444 | 0.0049559945037667  | 3 | Por         |
| 3.63587859994039e-07 | -1.25          | 0.00502151193437768 | 3 | Lpgat1      |
| 3.64823149017441e-07 | -1.49          | 0.00503857251107988 | 3 | Dpp7        |
| 3.76761791162711e-07 | 0.310294451115 | 0.0052034570977482  | 3 | Lars2       |
| 3.85029597218654e-07 | 0.56           | 0.00531764376718683 | 3 | Zyx         |
| 3.91227682074572e-07 | -1.74          | 0.00540324551713192 | 3 | Tcf21       |
| 3.98457794299738e-07 | -0.42103318044 | 0.00550310059707369 | 3 | Cyba        |
| 4.03164969884384e-07 | 1.17           | 0.00556811139907323 | 3 | Ssfa2       |
| 4.19785918515319e-07 | -0.80286073469 | 0.00579766332061507 | 3 | Jam3        |
| 4.26256940559451e-07 | -0.71076585785 | 0.00588703460606658 | 3 | Lbh         |
| 4.36802488994641e-07 | -0.64          | 0.00603267917550498 | 3 | Dip2c       |
| 4.41718535362893e-07 | -0.40          | 0.00610057469189692 | 3 | Pmepa1      |
| 4.57878549668356e-07 | -0.40891946964 | 0.00632376064946967 | 3 | Map1b       |
| 4.59524658519607e-07 | 0.604748834226 | 0.0063464950588143  | 3 | 2900060B14f |
| 4.67397202539338e-07 | -0.73092979685 | 0.0064552227642708  | 3 | Steap3      |
| 4.698380850201E-07   | -1.63          | 0.0064889337922126  | 3 | Wnt5a       |
| 4.71323061708549e-07 | -0.41542073531 | 0.00650944280525677 | 3 | Fkbp2       |
| 4.89680695288025e-07 | -1.62          | 0.00676298008262291 | 3 | Myoc        |
| 4.94737180267942e-07 | 1.25           | 0.00683281519668054 | 3 | Cpd         |
| 4.96848100823831e-07 | -0.78224508996 | 0.00686196912047792 | 3 | Fxyd6       |
| 5.16487075528328e-07 | -0.91311882793 | 0.00713320300012173 | 3 | Pofut2      |
| 5.18868069404623e-07 | -0.38          | 0.00716608690654724 | 3 | Ndufa11     |
| 5.47731689003951e-07 | -0.59098955721 | 0.00756472235683357 | 3 | Wipf1       |
| 5.49427104698477e-07 | 1.98           | 0.00758813774299066 | 3 | Flt4        |
| 5.63145403016539e-07 | 0.525339794736 | 0.00777760116106142 | 3 | Atrx        |
| 5.71393059274206e-07 | -0.34207710591 | 0.00789150954163606 | 3 | Sqstm1      |
| 5.73463061951753e-07 | 0.636233140233 | 0.00792009834861567 | 3 | Rnd1        |
| 5.73995009404895e-07 | -0.58613161657 | 0.007927445074891   | 3 | Tmed1       |
| 6.00347533183124e-07 | -0.52942101375 | 0.00829139978079213 | 3 | Etfa        |
| 6.07773928457052e-07 | -1.23          | 0.00839396572592034 | 3 | Cdon        |

|                      |                |                     |   |             |
|----------------------|----------------|---------------------|---|-------------|
| 6.14272519633976e-07 | -0.50          | 0.00848371776866484 | 3 | Ier5        |
| 6.14344092748066e-07 | 0.902114511438 | 0.00848470626494354 | 3 | 9430020K011 |
| 6.17886342281522e-07 | -0.35247743367 | 0.0085336282732501  | 3 | Atf4        |
| 6.21889825558996e-07 | -0.63381430174 | 0.0085889203807953  | 3 | Cnih4       |
| 6.26702621332772e-07 | -0.42967246652 | 0.00865538990322691 | 3 | Atp2a2      |
| 6.35276289745791e-07 | -1.06          | 0.00877380083767912 | 3 | Podn        |
| 6.79333484888877e-07 | -0.40896349518 | 0.00938227475980028 | 3 | Dag1        |
| 6.79992151718855e-07 | -0.85686678086 | 0.0093913716073891  | 3 | Dact3       |
| 6.89875007334175e-07 | -0.88054471382 | 0.00952786372629229 | 3 | Cacna2d1    |
| 6.99450364662258e-07 | -0.77402397134 | 0.00966010898635045 | 3 | Grb14       |
| 7.19667265746924e-07 | -0.41690842199 | 0.00993932460723077 | 3 | Atraid      |
| 7.23496956695552e-07 | -0.41651298638 | 0.00999221646892227 | 3 | Atp6ap2     |
| 7.25217389227124e-07 | -1.03          | 0.0100159773626158  | 3 | Clip3       |
| 7.37446341876104e-07 | -0.71906842684 | 0.0101848714276509  | 3 | Nfil3       |
| 7.46312573216376e-07 | -0.67612363343 | 0.0103073229486914  | 3 | Higd1a      |
| 7.66058114124162e-07 | -0.56118976987 | 0.0105800286141688  | 3 | Slc1a5      |
| 7.77060534989774e-07 | 0.33           | 0.0107319830487438  | 3 | Rps20       |
| 8.08263003680702e-07 | -0.37          | 0.0111629203438342  | 3 | Serpinh1    |
| 8.16638078833195e-07 | 1.28           | 0.0112785885067653  | 3 | Plk2        |
| 8.39244202875698e-07 | -1.73          | 0.0115908016859163  | 3 | Gsta3       |
| 8.40641027803395e-07 | -0.44049136386 | 0.0116100932349927  | 3 | Gstm1       |
| 8.54718343293896e-07 | -0.94970823094 | 0.011804515039232   | 3 | Rtn4r1      |
| 8.63544991254892e-07 | -0.73504118603 | 0.0119264198742213  | 3 | Scarf2      |
| 8.66888376780582e-07 | -0.31433869317 | 0.0119725953717166  | 3 | Pibid2      |
| 8.91506629017637e-07 | -0.36934423871 | 0.0123125980533626  | 3 | Dbi         |
| 8.9569722785277e-07  | -1.28          | 0.0123704744138746  | 3 | Ldhd        |
| 9.1125857152999e-07  | -1.08          | 0.0125853921314007  | 3 | Plekhh2     |
| 9.11477489327051e-07 | -1.06          | 0.0125884156050959  | 3 | Sh3kbp1     |
| 9.24852349056286e-07 | -0.46581417567 | 0.0127731357928164  | 3 | Smdt1       |
| 9.44299194257161e-07 | -0.36681348092 | 0.0130417161718857  | 3 | Acap2       |
| 9.60083513793596e-07 | -0.77453239728 | 0.0132597134090034  | 3 | Tbc1d2b     |
| 9.62447813161653e-07 | -0.57338963525 | 0.0132923667475756  | 3 | Ppt1        |
| 9.67018565245279e-07 | -0.64252995068 | 0.0133554934046026  | 3 | Cxxc1       |
| 9.88615535575422e-07 | 1.39           | 0.0136537691618321  | 3 | Glce        |
| 9.94553441369038e-07 | -0.60402261350 | 0.0137357775787478  | 3 | Sgcb        |
| 1.00930265993655e-06 | 2.03           | 0.0139394790363837  | 3 | Emcn        |
| 1.02042229868035e-06 | -0.47511860208 | 0.0140930523670744  | 3 | Tiparp      |
| 1.03572846968398e-06 | -0.34166231736 | 0.0143044458948054  | 3 | Sdc4        |
| 1.04312964334531e-06 | -0.98515986341 | 0.0144066635042421  | 3 | 3632451O061 |
| 1.06305590851302e-06 | -0.94225818278 | 0.0146818651524734  | 3 | Smo         |
| 1.16545594068211e-06 | -0.79618029086 | 0.0160961119967606  | 3 | Pde4dip     |
| 1.18419572964721e-06 | -0.40333797102 | 0.0163549272221576  | 3 | Vezf1       |
| 1.1867642519675e-06  | -0.66390049433 | 0.0163904010839232  | 3 | Lipa        |
| 1.19762455033753e-06 | -0.54205551396 | 0.0165403926647116  | 3 | Phpt1       |
| 1.19781897815323e-06 | -0.32547780119 | 0.0165430779072743  | 3 | Creg1       |
| 1.20272472098488e-06 | 1.11           | 0.0166108311215222  | 3 | Fnbp1l      |
| 1.21499526196961e-06 | -0.42265554832 | 0.0167802995630623  | 3 | Rasl11b     |
| 1.21682301017245e-06 | -1.77          | 0.0168055425934917  | 3 | Ebf2        |
| 1.27175279013599e-06 | -0.48178931769 | 0.0175641777845681  | 3 | Nav1        |
| 1.27805333500297e-06 | -0.84514236413 | 0.0176511946097261  | 3 | Angptl2     |
| 1.45908763312081e-06 | -1.57          | 0.0201514593010315  | 3 | Ism1        |
| 1.46727806704045e-06 | -0.48271562606 | 0.0202645773838956  | 3 | Ssr4        |
| 1.4933213375798e-06  | -0.28704984450 | 0.0206242609933146  | 3 | Zc3h11a     |
| 1.49597693349228e-06 | 0.345234114083 | 0.0206609374284619  | 3 | Ly6c2       |
| 1.51185059276104e-06 | -0.91712725005 | 0.0208801685366228  | 3 | Dapk1       |
| 1.51320481510527e-06 | -0.47523547132 | 0.0208988717014189  | 3 | Nfix        |



|                      |                |                    |   |             |
|----------------------|----------------|--------------------|---|-------------|
| 1.53390949209868e-06 | 0.746284306482 | 0.0211848239953748 | 3 | Azin1       |
| 1.54658274745121e-06 | -0.84222548728 | 0.0213598543250486 | 3 | Tubb6       |
| 1.55284079077794e-06 | -0.58668710112 | 0.0214462841614342 | 3 | Ift81       |
| 1.61258985035484e-06 | -0.65923631957 | 0.0222714784232507 | 3 | Syne1       |
| 1.63073888064644e-06 | -0.33642773974 | 0.0225221346806079 | 3 | Grina       |
| 1.65764073436812e-06 | -0.47821201832 | 0.0228936761823581 | 3 | Lsm4        |
| 1.72500583635036e-06 | -1.12          | 0.0238240556058348 | 3 | Ndr4        |
| 1.76524329981993e-06 | -0.98912760470 | 0.0243797752138131 | 3 | Atp9a       |
| 1.86405305902116e-06 | -0.82067755777 | 0.0257444367981413 | 3 | Tnfsf12     |
| 1.87619899097772e-06 | 1.57           | 0.0259121842643933 | 3 | Gngt2       |
| 1.87875085776713e-06 | -0.52157783629 | 0.0259474280966218 | 3 | Sidt2       |
| 1.95136930712063e-06 | -1.00          | 0.026950361500643  | 3 | Runx1       |
| 1.95140258501222e-06 | -0.39          | 0.0269508211016037 | 3 | Nudt4       |
| 1.95819397206824e-06 | -0.44163934019 | 0.0270446169482344 | 3 | Sec31a      |
| 1.97289822076115e-06 | 1.33           | 0.0272476973269322 | 3 | Unc13b      |
| 2.0045006425103e-06  | -1.24          | 0.0276841583737098 | 3 | Smim1       |
| 2.10048087131728e-06 | -0.53580881677 | 0.029009741313763  | 3 | Myh10       |
| 2.1683262724947e-06  | 1.05           | 0.0299467541494243 | 3 | Hey2        |
| 2.25261944405728e-06 | -1.30          | 0.031110927141875  | 3 | Tspan11     |
| 2.26876876408109e-06 | -0.99510219460 | 0.0313339654007239 | 3 | Fto         |
| 2.27401585723772e-06 | -0.39524174415 | 0.0314064330043101 | 3 | Serp1       |
| 2.3417098112894e-06  | -0.77863587490 | 0.032341354203718  | 3 | Prkab2      |
| 2.36387505359972e-06 | 1.62           | 0.0326474783652658 | 3 | Ica1        |
| 2.36526810151596e-06 | -1.62          | 0.0326667177500369 | 3 | Sult5a1     |
| 2.41081745234991e-06 | -0.45401656561 | 0.0332957998344046 | 3 | Nr3c1       |
| 2.44466905602826e-06 | -1.35          | 0.0337633243328063 | 3 | Pdzm3       |
| 2.47083005645806e-06 | -1.55          | 0.0341246339097423 | 3 | Ntrk3       |
| 2.48629887060217e-06 | -1.18          | 0.0343382737018866 | 3 | Deptor      |
| 2.49141142500383e-06 | -0.80971340292 | 0.0344088831907279 | 3 | B4galt5     |
| 2.52108456856489e-06 | -0.44596990713 | 0.0348186989764497 | 3 | Scarb2      |
| 2.59975695268286e-06 | -1.27          | 0.035905243273503  | 3 | Fzd2        |
| 2.63321688134604e-06 | -1.48          | 0.0363673583482701 | 3 | 5031426D15I |
| 2.7120971298471e-06  | -0.47983695792 | 0.0374567734603183 | 3 | Lpp         |
| 2.84076286590818e-06 | -0.81474735726 | 0.0392337759410578 | 3 | Adm         |
| 2.843515566225E-06   | -0.70127742490 | 0.0392717934851335 | 3 | Stx4a       |
| 2.86609865601716e-06 | -0.43175578709 | 0.039583688538253  | 3 | Tpi1        |
| 2.89484190536443e-06 | -1.34          | 0.0399806615549881 | 3 | Mn1         |
| 2.92299503977791e-06 | -0.63373970823 | 0.0403694844943727 | 3 | S100a4      |
| 2.9292968463578e-06  | -0.27583278899 | 0.0404565187450475 | 3 | Zbtb20      |
| 2.98771268455647e-06 | -0.89918261702 | 0.0412632998864094 | 3 | Slc25a24    |
| 2.99158357241543e-06 | 1.42           | 0.0413167607186295 | 3 | Afap1l2     |
| 3.02040012760239e-06 | -1.39          | 0.0417147461623167 | 3 | Cdk14       |
| 3.02553310793532e-06 | 0.759226745997 | 0.0417856377536947 | 3 | Sgms1       |
| 3.21078659740357e-06 | -0.40691181724 | 0.0443441736967407 | 3 | Ndufa5      |
| 3.2595797600832e-06  | -1.62          | 0.0450180560665091 | 3 | Gpr153      |
| 3.29433402523808e-06 | -0.93695724093 | 0.0454980472225631 | 3 | Map3k8      |
| 3.46148733417548e-06 | 0.294527685670 | 0.0478066015722976 | 3 | B2m         |
| 3.49097001559186e-06 | -1.55          | 0.0482137868853392 | 3 | Abhd11os    |
| 3.58975932413355e-06 | -1.26          | 0.0495781660256084 | 3 | Abca8b      |
| 3.62718016522078e-06 | -0.54341435183 | 0.0500949852618643 | 3 | Marcks      |
| 3.64079301955455e-06 | -1.43          | 0.0502829923930679 | 3 | Figf        |
| 3.66025874123926e-06 | -0.29459379615 | 0.0505518334752554 | 3 | Ctgf        |
| 3.98108424620504e-06 | 0.993740347836 | 0.0549827545243377 | 3 | Epha4       |
| 3.9857810412331e-06  | -0.90526145716 | 0.0550476219604703 | 3 | Gnao1       |
| 4.21684492323169e-06 | -1.52          | 0.0582388452347529 | 3 | Glt8d2      |
| 4.24380678239717e-06 | -0.55058166304 | 0.0586112154716874 | 3 | Tars        |



|                      |                |                    |   |             |
|----------------------|----------------|--------------------|---|-------------|
| 4.28790670488916e-06 | 1.04           | 0.0592202795012242 | 3 | Ptpn14      |
| 4.40800923090032e-06 | -0.58702518328 | 0.0608790154879644 | 3 | Kifap3      |
| 4.40900079610145e-06 | -1.07          | 0.0608927099949571 | 3 | Cdr2        |
| 4.45267603871077e-06 | -1.44          | 0.0614959087706344 | 3 | Kcne4       |
| 4.50045235882319e-06 | -1.52          | 0.062155747527707  | 3 | Ccbe1       |
| 4.58213573947908e-06 | -0.34692131601 | 0.0632838766979456 | 3 | Nab1        |
| 4.58665639828435e-06 | -0.50942174892 | 0.0633463115167051 | 3 | Bag3        |
| 4.58927773977228e-06 | -0.33840615737 | 0.0633825148639949 | 3 | Ak3         |
| 4.63528777289946e-06 | -1.12          | 0.0640179594315144 | 3 | Ccng1       |
| 4.76875101650953e-06 | -0.50521446620 | 0.0658612202890131 | 3 | Derl1       |
| 4.81021389743328e-06 | -0.65051602661 | 0.066433864137451  | 3 | Chpt1       |
| 4.94731179351759e-06 | -1.49          | 0.0683273231802714 | 3 | Htra4       |
| 4.97142946824011e-06 | -0.42165209063 | 0.0686604123858641 | 3 | Stt3b       |
| 4.99587830211917e-06 | -0.79          | 0.0689980752305678 | 3 | Ptgs2       |
| 5.02347521499651e-06 | -0.88311493809 | 0.0693792161943168 | 3 | Cdh11       |
| 5.07473790693712e-06 | -0.35833385862 | 0.0700872052327086 | 3 | Rpn2        |
| 5.21599943919265e-06 | -0.49606971628 | 0.0720381682546897 | 3 | 9530068E07F |
| 5.26171345931803e-06 | -0.47738162704 | 0.0726695245866413 | 3 | Morf4l2     |
| 5.33962084845744e-06 | -0.37066235262 | 0.0737455035380458 | 3 | Sepp1       |
| 5.36465119271025e-06 | 1.71           | 0.0740911976225213 | 3 | Clec1a      |
| 5.51378584262364e-06 | -0.79729028856 | 0.0761508962724751 | 3 | Eml1        |
| 5.62880803075655e-06 | -0.75282470152 | 0.0777394677127787 | 3 | Ptgfrn      |
| 5.8497847347089e-06  | -1.41          | 0.0807913769710646 | 3 | Fap         |
| 5.86317101953167e-06 | -0.42049020761 | 0.0809762549507519 | 3 | Hspe1       |
| 5.95431253155641e-06 | -0.54          | 0.0822350103733256 | 3 | Asph        |
| 5.95509273641281e-06 | 0.765678351156 | 0.0822457857825974 | 3 | Ppp3ca      |
| 6.04461428897128e-06 | -0.55152157157 | 0.0834821679449823 | 3 | Mbd3        |
| 6.09043947050489e-06 | -0.39206887639 | 0.084115059527143  | 3 | Gpx7        |
| 6.20448887608374e-06 | -1.03          | 0.0856901958675925 | 3 | Srpx2       |
| 6.64876478908564e-06 | -0.29235021307 | 0.0918260905020618 | 3 | Nupr1       |
| 6.66367461703389e-06 | -1.48          | 0.0920320101358551 | 3 | Rhou        |
| 6.82512943025852e-06 | -1.06          | 0.0942618625613004 | 3 | Serf1       |
| 6.82545618159824e-06 | 0.440864774185 | 0.0942663753240533 | 3 | Foxp1       |
| 7.13510197952281e-06 | -0.65313612774 | 0.0985428934391895 | 3 | Rnf181      |
| 7.30036468945477e-06 | -1.10          | 0.10               | 3 | Sgpp1       |
| 7.38492139734136e-06 | -0.71172215955 | 0.101993149418682  | 3 | Wbp4        |
| 7.60588956526771e-06 | -0.50549366211 | 0.105044940785912  | 3 | Socs3       |
| 7.6975652572598e-06  | -1.26          | 0.106311073768015  | 3 | Emilin2     |
| 7.79544054075909e-06 | 1.26           | 0.107662829308424  | 3 | Hyal2       |
| 7.85798658133605e-06 | -1.06          | 0.108526652674832  | 3 | Cdk5rap3    |
| 7.98057003692316e-06 | -1.29          | 0.110219652779946  | 3 | Galnt16     |
| 7.98738837060662e-06 | -0.36794606701 | 0.110313820786448  | 3 | Ndufb3      |
| 8.16390165328951e-06 | -0.42225586451 | 0.112751645733581  | 3 | Ube2b       |
| 8.27351738297514e-06 | -0.39443130295 | 0.11               | 3 | Fkbp9       |
| 8.44408037344167e-06 | -0.93          | 0.116621194037603  | 3 | Tgfbra1     |
| 8.53888962518581e-06 | 0.702812014076 | 0.117930604613441  | 3 | Bmpr2       |
| 8.80123075592766e-06 | -0.45310891156 | 0.121553797970117  | 3 | Dnajc1      |
| 8.85985980115231e-06 | 1.14           | 0.122363523713715  | 3 | Zfpm1       |
| 8.97758803926138e-06 | -1.15          | 0.123989468410239  | 3 | Gnai1       |
| 9.25375995563533e-06 | -1.51          | 0.13               | 3 | Chil1       |
| 9.26257310285997e-06 | 1.49           | 0.127925397123599  | 3 | Sncap       |
| 9.32482220874023e-06 | -0.30965200509 | 0.128785119524911  | 3 | Siae        |
| 9.53489793357167e-06 | -0.46          | 0.131686475360558  | 3 | Vimp        |
| 9.56904080961555e-06 | -0.79488604109 | 0.13               | 3 | Dclk1       |
| 9.60457829905697e-06 | -0.42558670387 | 0.132648830888276  | 3 | Oaf         |
| 1.00432292320422e-05 | -0.51512466282 | 0.138707038923735  | 3 | Dph3        |

|                      |                |                   |   |            |
|----------------------|----------------|-------------------|---|------------|
| 1.01407618655772e-05 | -0.96          | 0.140054062125486 | 3 | Sema3d     |
| 1.01423352835448e-05 | -1.00          | 0.140075792601037 | 3 | Ccl2       |
| 1.05474116801636e-05 | -0.33122933040 | 0.145670302714739 | 3 | Calm2      |
| 1.0573854030958e-05  | -0.33          | 0.146035498021561 | 3 | Slc25a5    |
| 1.06575173928519e-05 | -1.07          | 0.147190972712678 | 3 | Pmm1       |
| 1.06880841504723e-05 | -0.38          | 0.147613130202174 | 3 | Evc2       |
| 1.07692065646373e-05 | -0.54977832848 | 0.148733511864206 | 3 | Golph3     |
| 1.08273413449204e-05 | -1.56          | 0.149536411314696 | 3 | Fst        |
| 1.08386794961904e-05 | -0.83060180920 | 0.149693002521886 | 3 | Arsb       |
| 1.09885003721229e-05 | -1.27          | 0.151762178639389 | 3 | Tbx20      |
| 1.10928680527972e-05 | 0.334823980565 | 0.153203600677182 | 3 | Ifitm2     |
| 1.11343597164169e-05 | -0.81668519907 | 0.153776642043434 | 3 | Gmppa      |
| 1.11627570135616e-05 | -1.14          | 0.154168837114299 | 3 | Trak1      |
| 1.11929634405077e-05 | -1.82          | 0.154586018076852 | 3 | Ptx3       |
| 1.13168873304989e-05 | -0.33700188900 | 0.156297530921521 | 3 | Rtn4       |
| 1.16448818285775e-05 | -0.56856085777 | 0.160827462934484 | 3 | Ptov1      |
| 1.17432202932289e-05 | -0.38100462653 | 0.162185615469785 | 3 | lfrd1      |
| 1.18834185808856e-05 | 1.43           | 0.164121894020611 | 3 | Sema6a     |
| 1.20910457564151e-05 | -0.46777535069 | 0.166989432941849 | 3 | Ndufa1     |
| 1.23797368434055e-05 | -0.34953278049 | 0.170976545544273 | 3 | Rpn1       |
| 1.24614763331679e-05 | -0.85054973211 | 0.172105449637381 | 3 | Slc5a3     |
| 1.27274767101414e-05 | -0.90631315827 | 0.175779180843763 | 3 | Enpp2      |
| 1.27481234979577e-05 | -0.59249102154 | 0.176064333630293 | 3 | Sntb2      |
| 1.28421240091704e-05 | -0.90090617397 | 0.177362574690652 | 3 | Ptgir      |
| 1.31243203087152e-05 | 1.12           | 0.181259987783666 | 3 | Adipor2    |
| 1.33074184096365e-05 | -0.57640043619 | 0.18              | 3 | Fkbp3      |
| 1.33872493737835e-05 | 1.75           | 0.184891301101324 | 3 | Nhs12      |
| 1.3397347131153e-05  | -0.77049198774 | 0.185030761228354 | 3 | Angpt1     |
| 1.37746988671281e-05 | -0.53232833870 | 0.190242366053906 | 3 | Tram1      |
| 1.38082633217687e-05 | -0.29654452801 | 0.190705924736948 | 3 | Man2a1     |
| 1.39184805889523e-05 | -0.65408267850 | 0.19              | 3 | Mdk        |
| 1.39481368352614e-05 | -0.76153849703 | 0.192637717831796 | 3 | ldh1       |
| 1.42693186554804e-05 | -0.37493097896 | 0.20              | 3 | Tgfb1      |
| 1.43817752922836e-05 | -1.67          | 0.198626698561729 | 3 | Maob       |
| 1.44651475785675e-05 | -0.37526822350 | 0.199778153207596 | 3 | Stx2       |
| 1.4628447078661e-05  | 1.23           | 0.202033482603387 | 3 | Pdia5      |
| 1.47046320791515e-05 | -0.34330724609 | 0.203085673645162 | 3 | Bscl2      |
| 1.51788946441958e-05 | -0.54391326183 | 0.209635713930988 | 3 | Vdac1      |
| 1.54036226392468e-05 | -0.50051369474 | 0.212739432270637 | 3 | Commd3     |
| 1.56357952744509e-05 | -0.63          | 0.215945968535442 | 3 | Pdcd6      |
| 1.60389768525784e-05 | -1.31          | 0.221514309310961 | 3 | Kcnma1     |
| 1.61931937082321e-05 | -1.33          | 0.223644198304393 | 3 | Mme        |
| 1.62485166571532e-05 | -0.52370363320 | 0.224408263551943 | 3 | Gpsm1      |
| 1.63416136493536e-05 | -0.47          | 0.225694026111223 | 3 | Ipo4       |
| 1.70018860564711e-05 | -0.47411129905 | 0.234813048325922 | 3 | Myo9a      |
| 1.72670466532003e-05 | -1.06          | 0.24              | 3 | Rftn1      |
| 1.72818563611404e-05 | 1.67           | 0.238679718203711 | 3 | Atp10d     |
| 1.73818073245997e-05 | -1.33          | 0.240060140960046 | 3 | Tmeff2     |
| 1.76312556213236e-05 | -1.27          | 0.243505271386101 | 3 | Chrdl1     |
| 1.76903282128399e-05 | -0.34725648070 | 0.244321122947532 | 3 | Cct5       |
| 1.77066918042845e-05 | 0.616163951413 | 0.244547120508973 | 3 | Asap2      |
| 1.80082865788222e-05 | -1.29          | 0.248712445940114 | 3 | LOC1026365 |
| 1.80812769282419e-05 | -0.80758413331 | 0.249720515655948 | 3 | Ptprf      |
| 1.82489968141439e-05 | -1.34          | 0.252036895000142 | 3 | Fam132a    |
| 1.83136502191708e-05 | -0.80017761451 | 0.252929823176968 | 3 | Naaa       |
| 1.87858926266955e-05 | 0.938128143624 | 0.259451963067291 | 3 | Milt3      |

|                      |                |                   |   |             |
|----------------------|----------------|-------------------|---|-------------|
| 1.91880630674101e-05 | -0.84161244058 | 0.265006339024001 | 3 | Pja1        |
| 1.93096187523316e-05 | -0.77047996200 | 0.266685144588451 | 3 | Dpy19l1     |
| 1.93549056233967e-05 | -0.99067339882 | 0.267310601564732 | 3 | Pcbp4       |
| 1.96520238622258e-05 | 0.996702004078 | 0.271414101561201 | 3 | Nxn         |
| 1.96904272205945e-05 | -1.16          | 0.271944490343631 | 3 | Sobp        |
| 1.97318838042183e-05 | -0.65756245583 | 0.272517047220059 | 3 | Tnfaip3     |
| 2.00368174525277e-05 | -0.97929038043 | 0.28              | 3 | Col27a1     |
| 2.03300173381321e-05 | -1.44          | 0.280777869456943 | 3 | S1pr3       |
| 2.04323213884072e-05 | 0.356237003015 | 0.282190790695292 | 3 | Epha7       |
| 2.06021952353719e-05 | -1.44          | 0.284536918395721 | 3 | Cilp        |
| 2.14004027871189e-05 | -1.28          | 0.295560962892899 | 3 | Ifi205      |
| 2.16210709746167e-05 | -0.81117125241 | 0.298608611230431 | 3 | Plekhn2     |
| 2.17147048239447e-05 | -1.18          | 0.299901788323501 | 3 | Bdnf        |
| 2.17628996582804e-05 | -1.36          | 0.300567407180511 | 3 | Ildr2       |
| 2.25701634718568e-05 | -0.59658532761 | 0.311716527709814 | 3 | Creb3       |
| 2.27913443024007e-05 | -0.44053567184 | 0.314771256160455 | 3 | Vps35       |
| 2.28758788401997e-05 | -0.90739809747 | 0.315938762661998 | 3 | Flrt2       |
| 2.30500298163869e-05 | -0.74266030194 | 0.32              | 3 | Cd109       |
| 2.39067602231676e-05 | -0.48650582392 | 0.330176265442168 | 3 | Trappc2l    |
| 2.39610352382803e-05 | -0.43613498287 | 0.330925857675889 | 3 | Kmt2c       |
| 2.44438367105116e-05 | -0.85956055500 | 0.337593828808876 | 3 | Pqlc3       |
| 2.44812036494014e-05 | -0.26368716120 | 0.338109903601883 | 3 | Cacybp      |
| 2.45162011419385e-05 | 0.870810673236 | 0.338593253971312 | 3 | Apbb2       |
| 2.45266333796132e-05 | -0.35706579812 | 0.338737333605838 | 3 | Slc25a4     |
| 2.48699380346942e-05 | -0.36278602563 | 0.343478714197161 | 3 | Marc2       |
| 2.48842364435644e-05 | 0.71           | 0.343676189522067 | 3 | Dmap1       |
| 2.49147072568335e-05 | -1.55          | 0.344097021924128 | 3 | Gng8        |
| 2.50437471980512e-05 | -0.86          | 0.345879192552285 | 3 | Baiap2      |
| 2.51746068373855e-05 | -1.32          | 0.347686495031132 | 3 | Foxs1       |
| 2.5406188226001e-05  | -0.27458837990 | 0.350884865589299 | 3 | Mrpl20      |
| 2.55302942953232e-05 | -1.02          | 0.352598894512708 | 3 | Isg20       |
| 2.59224203695739e-05 | -1.27          | 0.358014547724186 | 3 | Cys1        |
| 2.60554661126933e-05 | -0.39488781351 | 0.359852042482407 | 3 | Acaa2       |
| 2.63445451119289e-05 | 0.428658305940 | 0.36              | 3 | Rpl18a      |
| 2.65148579619363e-05 | -1.22          | 0.366196703312303 | 3 | Akr1b8      |
| 2.66097351766521e-05 | -1.20          | 0.367507052524743 | 3 | Pcdh18      |
| 2.67368812193143e-05 | -0.26202842116 | 0.37              | 3 | Atf6        |
| 2.67595137633678e-05 | -0.51065442800 | 0.369575644585873 | 3 | Sec61a1     |
| 2.68145067756482e-05 | -0.38577944122 | 0.370335153078477 | 3 | Jak1        |
| 2.69000692818971e-05 | -0.79034900512 | 0.371516856852281 | 3 | Enc1        |
| 2.69571367393383e-05 | -0.70          | 0.372305015507001 | 3 | Gnptg       |
| 2.71622844253543e-05 | -1.19          | 0.375138310198569 | 3 | Lsamp       |
| 2.71664431343345e-05 | -0.27305746392 | 0.375195746128294 | 3 | Hcfc1r1     |
| 2.73235247346532e-05 | -1.71          | 0.377365200110295 | 3 | Slc10a6     |
| 2.75826684701341e-05 | -0.36616525704 | 0.380944234241022 | 3 | Lrp6        |
| 2.84790671938985e-05 | 1.01           | 0.393324397014932 | 3 | Prpf40b     |
| 2.97659535552462e-05 | 0.786222788735 | 0.411097584551505 | 3 | Id1         |
| 2.97739482567226e-05 | 0.586846797981 | 0.411207999373596 | 3 | Tulp4       |
| 3.07902335177803e-05 | -1.22          | 0.425243915114063 | 3 | 1500009L16F |
| 3.10405020102736e-05 | -0.31965574117 | 0.428700373263889 | 3 | Tmem167     |
| 3.13262941738982e-05 | 0.580881285580 | 0.432647448835708 | 3 | Sulf1       |
| 3.13450943110395e-05 | -0.36421227597 | 0.432907097529767 | 3 | Map3k2      |
| 3.13568919535464e-05 | -0.56415942299 | 0.433070034770429 | 3 | Cnn2        |
| 3.14169286842288e-05 | -0.62262395151 | 0.433899202057884 | 3 | Ptpsr       |
| 3.17779081943832e-05 | -0.40066738164 | 0.438884690072627 | 3 | Romo1       |
| 3.20726194826883e-05 | -0.78          | 0.442954947675408 | 3 | Uchl4       |

|                      |                |                   |   |             |
|----------------------|----------------|-------------------|---|-------------|
| 3.2350003276364e-05  | -0.38251304239 | 0.446785895249863 | 3 | Surf4       |
| 3.26083409170586e-05 | -0.36003759154 | 0.450353796405496 | 3 | Ifnar2      |
| 3.39093836783208e-05 | -0.80571734602 | 0.468322497981288 | 3 | Habp4       |
| 3.39297598349919e-05 | -0.28540161024 | 0.468603913081073 | 3 | Rbbp7       |
| 3.41051972153553e-05 | -0.55161293197 | 0.471026878741273 | 3 | Anxa6       |
| 3.41998434601678e-05 | -0.59332245164 | 0.472334038028378 | 3 | Psmc5       |
| 3.45331224437974e-05 | -0.62484962577 | 0.476936954071285 | 3 | Cct3        |
| 3.48724656490288e-05 | -1.35          | 0.481623623078737 | 3 | Gfra1       |
| 3.51739778288785e-05 | -0.51317248500 | 0.485787807794641 | 3 | Csmp1       |
| 3.62826824239239e-05 | -0.89831563751 | 0.501100126956813 | 3 | Elmo2       |
| 3.76786556776706e-05 | -0.32523767633 | 0.520379913564308 | 3 | Ccdc23      |
| 3.7695303963315e-05  | -1.37          | 0.520609843037344 | 3 | Aldh7a1     |
| 3.78645269889147e-05 | 0.551149978038 | 0.522946982243901 | 3 | Gata6       |
| 3.82069703209984e-05 | -1.16          | 0.53              | 3 | Cpeb1       |
| 3.85289544429443e-05 | -0.59186259724 | 0.532123389811504 | 3 | Man1a2      |
| 3.8750170402405e-05  | -0.46          | 0.535178603427616 | 3 | Csnk1a1     |
| 4.01013159825748e-05 | -1.03          | 0.55              | 3 | Acot13      |
| 4.04809983662505e-05 | -0.42408325562 | 0.559083068436286 | 3 | Prdx4       |
| 4.20937151098432e-05 | -1.04          | 0.581356299382044 | 3 | Pde1a       |
| 4.25497122270028e-05 | -1.14          | 0.587654075567135 | 3 | Omd         |
| 4.27182880325182e-05 | -1.11          | 0.589982276017109 | 3 | Fam19a5     |
| 4.34638808612375e-05 | -0.30182117434 | 0.60              | 3 | Nucb1       |
| 4.37073631611204e-05 | -1.01          | 0.603642392618233 | 3 | Prkca       |
| 4.37262058872033e-05 | -0.75521312713 | 0.603902629508165 | 3 | Fam3a       |
| 4.47789791528256e-05 | 0.504623993257 | 0.618442481079674 | 3 | Msn         |
| 4.52561694822145e-05 | -0.75753804593 | 0.625032956718865 | 3 | Fam89b      |
| 4.53121524795591e-05 | -0.52597361542 | 0.63              | 3 | Fkbp4       |
| 4.57259876129103e-05 | -1.00          | 0.631521614921904 | 3 | Hspb2       |
| 4.58523839931645e-05 | -1.01          | 0.633267275329595 | 3 | Cspg4       |
| 4.61654148309476e-05 | -0.48375614730 | 0.637590544230218 | 3 | Ikbip       |
| 4.63609680576735e-05 | -0.54249281147 | 0.640291329844528 | 3 | 1110001J03F |
| 4.72101588437741e-05 | 0.437169620552 | 0.652019503791364 | 3 | Tgm2        |
| 4.78903268120497e-05 | -0.29033307776 | 0.661413303601218 | 3 | Egln1       |
| 4.86901379754327e-05 | -0.46106166332 | 0.672459495578701 | 3 | Vapa        |
| 4.99507447690403e-05 | -1.26          | 0.689869736005216 | 3 | Pi4k2a      |
| 5.18689020349684e-05 | -0.37101360646 | 0.716361406004948 | 3 | Tgfb3       |
| 5.1889398323175e-05  | -1.16          | 0.72              | 3 | Sil1        |
| 5.29503229195877e-05 | -0.34338980777 | 0.731296909842425 | 3 | Ttc3        |
| 5.35528089003282e-05 | -0.80          | 0.739617843722433 | 3 | Ang         |
| 5.39079013430409e-05 | -0.32214286273 | 0.744522025448738 | 3 | Flii        |
| 5.43105515879612e-05 | -0.66126827535 | 0.750083027981332 | 3 | C1qtnf6     |
| 5.71288090247514e-05 | -0.30989805333 | 0.789005981440841 | 3 | Tspan4      |
| 5.73879121014789e-05 | 0.609219290805 | 0.792584454033525 | 3 | Bnip2       |
| 5.83652132338185e-05 | -0.46020839388 | 0.806081959972268 | 3 | Slc39a14    |
| 5.99365126837778e-05 | -0.97294114102 | 0.827783176675656 | 3 | Abcb1b      |
| 6.01191129999736e-05 | -0.57712071645 | 0.830305069642635 | 3 | Dbn2        |
| 6.06758864912958e-05 | -0.74863019267 | 0.837994668331286 | 3 | Ssbp2       |
| 6.07299394578641e-05 | -0.47430121454 | 0.838741193852561 | 3 | 2010012O05I |
| 6.11749337339909e-05 | -1.28          | 0.844887009800148 | 3 | Gria4       |
| 6.1213574324123e-05  | 1.15           | 0.845420674990463 | 3 | AW112010    |
| 6.16922837124249e-05 | -1.01          | 0.85              | 3 | Efs         |
| 6.17655478442443e-05 | -0.74046597719 | 0.853043981276858 | 3 | Papss1      |
| 6.24563372202355e-05 | 0.749617486003 | 0.862584473348673 | 3 | Hspa1a      |
| 6.35531242875687e-05 | -0.43698357266 | 0.877732199535611 | 3 | Etfb        |
| 6.43289573989481e-05 | 0.662427139390 | 0.888447230636872 | 3 | Entpd1      |
| 6.55315310404762e-05 | -0.53242769813 | 0.905055975200017 | 3 | Fam98a      |



|                      |                |                   |   |          |
|----------------------|----------------|-------------------|---|----------|
| 6.57612106160071e-05 | 0.571082607404 | 0.908228079817674 | 3 | Fbln2    |
| 6.60054584172896e-05 | -1.70          | 0.911601386201186 | 3 | Ccl11    |
| 6.73808877725455e-05 | -0.40607754525 | 0.930597441026625 | 3 | Cndp2    |
| 6.83982491492744e-05 | -0.41622568650 | 0.944648219000628 | 3 | Atp5d    |
| 6.88136924599158e-05 | 0.293769138072 | 0.950385906563897 | 3 | Cd200    |
| 6.89327734069976e-05 | -1.58          | 0.952030533524043 | 3 | Cxcl14   |
| 7.05230512241967e-05 | -0.28100842794 | 0.973993860457381 | 3 | H2afj    |
| 7.0540220109473e-05  | -0.25337250097 | 0.974230979931932 | 3 | Clptm1l  |
| 7.10747348452525e-05 | -1.31          | 0.981613162947783 | 3 | Epyc     |
| 7.12354617236176e-05 | -0.26404817032 | 0.983832961864883 | 3 | Kcnb1    |
| 7.16801768254705e-05 | -0.86873993032 | 0.989974922136574 | 3 | Wdr35    |
| 7.22251628043E-05    | -0.43297153437 | 0.997501723490188 | 3 | Mrpl32   |
| 7.2235723029686e-05  | -0.93079055945 | 0.997647570762993 | 3 | Abcc5    |
| 7.34539983674304e-05 | 0.488343429098 | 1.00              | 3 | Ywhae    |
| 7.75013481981504e-05 | -0.99265738613 | 1.00              | 3 | Mustn1   |
| 7.84125706763952e-05 | -0.39280964086 | 1.00              | 3 | Rabgap1l |
| 7.88869655948284e-05 | -0.63011118509 | 1.00              | 3 | Plin3    |
| 7.93967197353435e-05 | -0.80095193343 | 1.00              | 3 | Glo1     |
| 8.12898280545716e-05 | -0.76909267399 | 1.00              | 3 | Nnmt     |
| 8.27173095773605e-05 | -1.16          | 1.00              | 3 | Efhd1    |
| 8.31832258658585e-05 | -0.74745318481 | 1.00              | 3 | Hlf      |
| 8.39814891887279e-05 | -0.96458738340 | 1.00              | 3 | Adcy5    |
| 8.49056539280197e-05 | -0.91522591845 | 1.00              | 3 | Nsg1     |
| 8.49321643197069e-05 | -0.78196890454 | 1.00              | 3 | Kazald1  |
| 8.54155305653044e-05 | -1.19          | 1.00              | 3 | Fibin    |
| 8.64722926364867e-05 | -0.39802899260 | 1.00              | 3 | Acadsb   |
| 8.68018360114678e-05 | -1.28          | 1.00              | 3 | Irs1     |
| 8.69450866148709e-05 | -1.34          | 1.00              | 3 | Loxl3    |
| 8.81602527373812e-05 | -0.89929681790 | 1.00              | 3 | Pfn2     |
| 8.8335252528821e-05  | -0.42605488980 | 1.00              | 3 | Gm15421  |
| 8.90818169385804e-05 | 0.925606082394 | 1.00              | 3 | Slc7a1   |
| 9.00807904271419e-05 | -0.54472322953 | 1.00              | 3 | Lztr1    |
| 9.09069906704832e-05 | -0.38038921390 | 1.00              | 3 | Nop58    |
| 9.15740560584366e-05 | -0.65224836871 | 1.00              | 3 | Csad     |
| 9.31097534377137e-05 | -0.48060826230 | 1.00              | 3 | Npepps   |
| 9.33170652706694e-05 | -0.29215454410 | 1.00              | 3 | Comt     |
| 9.39799817760772e-05 | 0.389114765756 | 1.00              | 3 | Cyr61    |
| 9.39882658430945e-05 | -0.48923645549 | 1.00              | 3 | Flot1    |
| 9.4328413316334e-05  | -1.13          | 1.00              | 3 | Pgls     |
| 9.43474549547231e-05 | -0.29664565806 | 1.00              | 3 | Trib1    |
| 9.44450644275513e-05 | -0.41374931677 | 1.00              | 3 | N6amt1   |
| 9.47666657820172e-05 | -0.27999831665 | 1.00              | 3 | Gstp1    |
| 9.49169708287225e-05 | -1.34          | 1.00              | 3 | Hp       |
| 9.51790077618521e-05 | -1.10          | 1.00              | 3 | Ldlr     |
| 9.52258824839984e-05 | -0.56794838789 | 1.00              | 3 | Chd3     |
| 9.67147524696143e-05 | -0.31363017359 | 1.00              | 3 | Ndufb2   |
| 9.73991489667701e-05 | -0.27780738566 | 1.00              | 3 | Tead1    |
| 9.78334419116052e-05 | -0.25203947715 | 1.00              | 3 | Ufc1     |
| 9.91978865092351e-05 | -0.77981187701 | 1.00              | 3 | Npy1r    |
| 9.97927215066926e-05 | -1.45          | 1.00              | 3 | Olfml1   |
| 9.98397038798397e-05 | -0.45010275900 | 1.00              | 3 | Ptp4a1   |
| 0.000101264414853515 | -0.63150347280 | 1.00              | 3 | Bcl3     |
| 0.000102087726398434 | 0.810269339993 | 1.00              | 3 | Adipor1  |
| 0.000102361226695667 | -1.21          | 1.00              | 3 | Ptpdc1   |
| 0.000105983597122001 | -0.63925650686 | 1.00              | 3 | Gda      |
| 0.000107129934326185 | -0.28          | 1.00              | 3 | Cbx6     |



|                      |                |      |   |             |
|----------------------|----------------|------|---|-------------|
| 0.000107916750554147 | -0.89325942828 | 1.00 | 3 | Uchl3       |
| 0.000108144019423403 | -0.52243198966 | 1.00 | 3 | P4ha1       |
| 0.000110754686184377 | -1.03          | 1.00 | 3 | Twist2      |
| 0.000110771926885659 | -0.30848954096 | 1.00 | 3 | 2010107E04F |
| 0.000110852266326798 | -0.68          | 1.00 | 3 | Phf2        |
| 0.00011351460344542  | 0.250258440366 | 1.00 | 3 | Rps11       |
| 0.000113946580282679 | -0.61949960080 | 1.00 | 3 | Nol12       |
| 0.000114396687360623 | -0.66          | 1.00 | 3 | Crtc3       |
| 0.000115001068933699 | -0.67670076709 | 1.00 | 3 | Fam20c      |
| 0.000115353447193341 | -1.20          | 1.00 | 3 | Al607873    |
| 0.000117129224808573 | 0.815241116869 | 1.00 | 3 | Med11       |
| 0.000117154138459462 | -0.98183133026 | 1.00 | 3 | Tdrd7       |
| 0.000119990152622797 | -0.87471865993 | 1.00 | 3 | Agtrap      |
| 0.000122336053076994 | -0.73559099911 | 1.00 | 3 | Gm3258      |
| 0.000123293834324758 | -0.82167934993 | 1.00 | 3 | Wdsub1      |
| 0.00012453105926624  | -0.54826902864 | 1.00 | 3 | Smim4       |
| 0.000125510009868981 | -1.44          | 1.00 | 3 | Enpp3       |
| 0.000128934616083601 | -0.98050001093 | 1.00 | 3 | Antxr2      |
| 0.000129269086191874 | -0.79890241124 | 1.00 | 3 | Khdrbs3     |
| 0.000131364036494241 | -0.37762117811 | 1.00 | 3 | Tgfb2       |
| 0.000131962025938082 | -1.09          | 1.00 | 3 | Lrig1       |
| 0.000132035322196926 | -0.36735034917 | 1.00 | 3 | Ppp1cb      |
| 0.000133134602242985 | 1.01           | 1.00 | 3 | Gata3       |
| 0.000133224633168051 | 1.46           | 1.00 | 3 | Ralgapa2    |
| 0.000134771678718692 | -0.54          | 1.00 | 3 | Rcor3       |
| 0.000135646985171906 | -0.54408603271 | 1.00 | 3 | Olf1r1033   |
| 0.000137691036665992 | -1.05          | 1.00 | 3 | Gcsh        |
| 0.000139345900585385 | -0.85753112362 | 1.00 | 3 | Ift74       |
| 0.000139833166744801 | -0.91780106208 | 1.00 | 3 | Lepre1      |
| 0.000145004334170132 | -0.53          | 1.00 | 3 | Cercam      |
| 0.00014684915078421  | -0.27399984044 | 1.00 | 3 | Sgce        |
| 0.000150221981581898 | -0.73072057724 | 1.00 | 3 | Trps1       |
| 0.000150925827880243 | 0.819476850949 | 1.00 | 3 | Arhgap29    |
| 0.00015196638935406  | -0.64077931527 | 1.00 | 3 | Tmem150a    |
| 0.000152493366200778 | -0.92309904326 | 1.00 | 3 | Fbxw8       |
| 0.000152642677247619 | -0.29          | 1.00 | 3 | Sash1       |
| 0.000155246618518708 | -0.68215432912 | 1.00 | 3 | Nolc1       |
| 0.000159797019875609 | -0.34170413364 | 1.00 | 3 | Gnb4        |
| 0.000161333677340402 | 1.20           | 1.00 | 3 | Ephb4       |
| 0.000161450989863318 | -0.39          | 1.00 | 3 | Ces2g       |
| 0.000163460636593621 | 1.07           | 1.00 | 3 | Pqlc1       |
| 0.00016370483492899  | -0.28560714733 | 1.00 | 3 | Zcrb1       |
| 0.000164091423857712 | 0.592707623911 | 1.00 | 3 | Tmod3       |
| 0.000167456652099999 | -1.37          | 1.00 | 3 | Bdh2        |
| 0.000167992281157448 | -1.06          | 1.00 | 3 | Htatip2     |
| 0.000170030961801612 | -1.41          | 1.00 | 3 | 1110065P20F |
| 0.000172380947698086 | -1.07          | 1.00 | 3 | Fam13c      |
| 0.000173388457554073 | -0.39230791941 | 1.00 | 3 | Crel2       |
| 0.000173953347602968 | -0.69292669094 | 1.00 | 3 | Aldh18a1    |
| 0.000174753856264719 | -0.79327457909 | 1.00 | 3 | Syvn1       |
| 0.000176808116133712 | -0.37633464659 | 1.00 | 3 | Tmem147     |
| 0.000177154229869093 | -0.55874886113 | 1.00 | 3 | 2310022B05F |
| 0.000178611937077481 | -0.25481357517 | 1.00 | 3 | Cops5       |
| 0.00018055193269885  | -1.79          | 1.00 | 3 | Angptl7     |
| 0.000183308067435314 | -0.94497923259 | 1.00 | 3 | Thrb        |
| 0.00018442118639755  | -0.55287113291 | 1.00 | 3 | Usp2        |

|                      |                |      |   |          |
|----------------------|----------------|------|---|----------|
| 0.000184786969656817 | -0.77026082260 | 1.00 | 3 | Cmtm3    |
| 0.000185038878717033 | -0.33887493051 | 1.00 | 3 | Sh3pxd2a |
| 0.000185862183588577 | -0.34065733278 | 1.00 | 3 | Osbp18   |
| 0.000186577302293482 | -0.76995668214 | 1.00 | 3 | Pdxk     |
| 0.000188079442371972 | -0.45865334286 | 1.00 | 3 | Mtdh     |
| 0.000192465435716332 | 1.16           | 1.00 | 3 | Enpp4    |
| 0.000192979262472619 | 0.26           | 1.00 | 3 | Pam      |
| 0.000197872150480262 | -0.38843708355 | 1.00 | 3 | Manf     |
| 0.000198115113754598 | -0.83249774051 | 1.00 | 3 | Gpr39    |
| 0.000198572044420887 | -0.70329716482 | 1.00 | 3 | Sgcd     |
| 0.000199660341617292 | -0.25086770272 | 1.00 | 3 | Ran      |
| 0.000200132981687333 | -0.28226662937 | 1.00 | 3 | Nup153   |
| 0.000204899255710568 | -0.77619341088 | 1.00 | 3 | Prkcd    |
| 0.000205179459928778 | -0.68814121696 | 1.00 | 3 | Mef2c    |
| 0.000205719918851135 | -1.26          | 1.00 | 3 | Vldlr    |
| 0.000214111183412405 | 0.264579033692 | 1.00 | 3 | Cfh      |
| 0.000214154821464862 | 0.815272385435 | 1.00 | 3 | Tmem141  |
| 0.000217131357455898 | 0.663993196700 | 1.00 | 3 | Ptk2b    |
| 0.000218486479085665 | -0.54627374530 | 1.00 | 3 | Myg1     |
| 0.0002185786799333   | 1.20           | 1.00 | 3 | Ggta1    |
| 0.000219006142462014 | -0.40805829036 | 1.00 | 3 | Zeb1     |
| 0.000219313227985689 | -0.89152969316 | 1.00 | 3 | Gstt3    |
| 0.000220217321676429 | 0.790311439338 | 1.00 | 3 | Bcap29   |
| 0.000222599627219837 | -0.40          | 1.00 | 3 | Phldb1   |
| 0.000222830646010652 | -1.19          | 1.00 | 3 | Ednra    |
| 0.000224088399256623 | 0.659915455374 | 1.00 | 3 | Itga3    |
| 0.000225374322124448 | -0.30079741304 | 1.00 | 3 | Arl4a    |
| 0.000230826838807714 | -0.34251376895 | 1.00 | 3 | Pbx1     |
| 0.000231702580185506 | -0.28          | 1.00 | 3 | Epdr1    |
| 0.000234439541273937 | -0.47447672935 | 1.00 | 3 | Tprkb    |
| 0.000237285139473398 | -0.27584257982 | 1.00 | 3 | Atp5a1   |
| 0.000237889009276499 | -0.25973849289 | 1.00 | 3 | Tomm22   |
| 0.000238368200515626 | -0.61350156330 | 1.00 | 3 | Mta3     |
| 0.000241013132816707 | -0.73584806330 | 1.00 | 3 | Smim8    |
| 0.000242445611581231 | -0.95123239607 | 1.00 | 3 | Mzt2     |
| 0.000243055817714742 | -0.64434540035 | 1.00 | 3 | Flt3l    |
| 0.000243083884268888 | -0.40527006909 | 1.00 | 3 | Sema3b   |
| 0.000244792536400334 | -0.36204957038 | 1.00 | 3 | Lgals3   |
| 0.000246464191922711 | -0.83364952340 | 1.00 | 3 | Apip     |
| 0.00024651739589993  | -0.69523260499 | 1.00 | 3 | Gypc     |
| 0.000246746321012433 | -0.85054973211 | 1.00 | 3 | Rasa3    |
| 0.000247032211937627 | -0.60262280315 | 1.00 | 3 | Clcc1    |
| 0.000248176284559771 | -0.82014203217 | 1.00 | 3 | Acbd6    |
| 0.000248531766770662 | -0.49177180220 | 1.00 | 3 | Pim1     |
| 0.000249025951794345 | -0.94456913458 | 1.00 | 3 | Map3k5   |
| 0.00024916829193779  | -0.63746321485 | 1.00 | 3 | Dnajc25  |
| 0.000249405939956841 | -0.97267568014 | 1.00 | 3 | Traf3    |
| 0.000250051050530335 | -1.45          | 1.00 | 3 | Gfra2    |
| 0.000254024600949833 | -0.39751805087 | 1.00 | 3 | Filip1l  |
| 0.000254501792219362 | -0.81          | 1.00 | 3 | Kiz      |
| 0.000254515173192478 | -1.19          | 1.00 | 3 | Mark1    |
| 0.000258365993040161 | 1.76           | 1.00 | 3 | Bpgm     |
| 0.000260724116952748 | -0.28250421635 | 1.00 | 3 | Psmd1    |
| 0.000262457215018094 | -0.33460604996 | 1.00 | 3 | Klf9     |
| 0.000265219646644779 | -0.42209386516 | 1.00 | 3 | Il1r1    |
| 0.000265836134916458 | -0.60456418745 | 1.00 | 3 | Gusb     |

|                      |                |      |   |             |
|----------------------|----------------|------|---|-------------|
| 0.000269359846602015 | -0.66144539767 | 1.00 | 3 | Dcbld2      |
| 0.000270791451714891 | -0.60527542960 | 1.00 | 3 | Txnrd1      |
| 0.000271378448747009 | -1.03          | 1.00 | 3 | Tmem38b     |
| 0.000279116195870911 | 1.01           | 1.00 | 3 | Tmpo        |
| 0.000282460298414056 | -1.33          | 1.00 | 3 | Trim41      |
| 0.000282500927145288 | -0.31884610253 | 1.00 | 3 | Rbms1       |
| 0.00028510492845261  | -0.46628040547 | 1.00 | 3 | Qsox1       |
| 0.000285814616989472 | -0.56236729862 | 1.00 | 3 | Acadvl      |
| 0.000286383715760998 | -0.28047799562 | 1.00 | 3 | Rrbp1       |
| 0.000286511739489425 | -0.80841350227 | 1.00 | 3 | Rab7l1      |
| 0.000288376477092334 | 0.962546171896 | 1.00 | 3 | Gng11       |
| 0.00028860181846532  | -0.32560163253 | 1.00 | 3 | Cdo1        |
| 0.000289438731008767 | -0.33106137969 | 1.00 | 3 | Pkn2        |
| 0.000290484433377521 | -0.56579851281 | 1.00 | 3 | Sssca1      |
| 0.000291540877372676 | 0.92           | 1.00 | 3 | Klf7        |
| 0.000292017282936179 | 1.15           | 1.00 | 3 | Fam43a      |
| 0.000294803770366668 | -0.99767594860 | 1.00 | 3 | Gcdh        |
| 0.000295034097674053 | -0.36894069888 | 1.00 | 3 | Asap3       |
| 0.000298423321538412 | -0.52348302765 | 1.00 | 3 | 9030624J02F |
| 0.000298917022026648 | -0.80523965679 | 1.00 | 3 | Sh3pxd2b    |
| 0.000306205582274119 | -0.37968519489 | 1.00 | 3 | Lonrf3      |
| 0.000311943007858143 | -0.33670890376 | 1.00 | 3 | Mtmr6       |
| 0.000313662159433929 | 1.11           | 1.00 | 3 | Fam135a     |
| 0.000318843591371173 | -1.43          | 1.00 | 3 | Ntrk2       |
| 0.000324548606187228 | -1.56          | 1.00 | 3 | Al507597    |
| 0.000324591503982162 | -0.27224514619 | 1.00 | 3 | Aga         |
| 0.000329312426337434 | -0.46875341541 | 1.00 | 3 | Smtn        |
| 0.000331286531237785 | 0.879732511197 | 1.00 | 3 | Anp32a      |
| 0.000332172449042625 | -0.85          | 1.00 | 3 | S1pr2       |
| 0.00033284919982895  | -0.27308889423 | 1.00 | 3 | Jmjd1c      |
| 0.000336769576937106 | -0.31357624878 | 1.00 | 3 | Pkia        |
| 0.000339425692317713 | -0.39686852809 | 1.00 | 3 | Snap47      |
| 0.000355268895993099 | -0.36992387778 | 1.00 | 3 | Csf1        |
| 0.000358121019163694 | -0.71091461711 | 1.00 | 3 | Setd7       |
| 0.000359570251561384 | 0.894994087921 | 1.00 | 3 | Dusp6       |
| 0.00036696684123518  | -0.45324353227 | 1.00 | 3 | Nqo2        |
| 0.000367438699578619 | -0.74834184124 | 1.00 | 3 | Prdm5       |
| 0.000369882143870445 | -0.80559599416 | 1.00 | 3 | Aptx        |
| 0.000376915942315192 | -0.86942403570 | 1.00 | 3 | Casc4       |
| 0.000376993124913819 | -0.35549873203 | 1.00 | 3 | Tmem204     |
| 0.00037723284026512  | 0.576384708295 | 1.00 | 3 | Ndrp1       |
| 0.000379963622738705 | -0.66363501630 | 1.00 | 3 | Postn       |
| 0.000381120589337017 | -1.26          | 1.00 | 3 | Angptl1     |
| 0.000381589700687448 | 1.39           | 1.00 | 3 | Map3k1      |
| 0.000382825445413038 | -0.72559560757 | 1.00 | 3 | Psmd10      |
| 0.000393888040150009 | -0.51993975173 | 1.00 | 3 | Tnfrsf11b   |
| 0.000394768527103943 | 0.433769138035 | 1.00 | 3 | Hes1        |
| 0.000395482291861004 | -1.01          | 1.00 | 3 | Dlg5        |
| 0.000397054532803605 | 1.19           | 1.00 | 3 | Ppm1f       |
| 0.000402561489121556 | -0.66791585670 | 1.00 | 3 | Nbea        |
| 0.00040476836218978  | -0.69389085621 | 1.00 | 3 | Snta1       |
| 0.000406053628211015 | -0.42411874041 | 1.00 | 3 | Zfp131      |
| 0.000409225476804105 | -0.27258753527 | 1.00 | 3 | Eif1a       |
| 0.000409501888543523 | -0.36269852319 | 1.00 | 3 | Poglut1     |
| 0.000415312385281527 | -0.61774939849 | 1.00 | 3 | Mpp5        |
| 0.000421424417338807 | -0.59921608363 | 1.00 | 3 | Itm2a       |

|                      |                |      |   |             |
|----------------------|----------------|------|---|-------------|
| 0.000432388831042263 | -0.83          | 1.00 | 3 | Coq10b      |
| 0.000433654224460479 | -0.64925645188 | 1.00 | 3 | 2310011J03F |
| 0.000434420727257684 | -1.01          | 1.00 | 3 | Mfsd11      |
| 0.000443118116422631 | -0.70          | 1.00 | 3 | Siva1       |
| 0.000446609759222372 | -0.30          | 1.00 | 3 | Gaa         |
| 0.000450182061799103 | -0.56241060830 | 1.00 | 3 | Ndufaf2     |
| 0.000453855588049841 | 0.714295115364 | 1.00 | 3 | Txnrd3      |
| 0.000455193589481452 | -0.62411841885 | 1.00 | 3 | Herpud2     |
| 0.000456192818633925 | -0.88989337413 | 1.00 | 3 | Farp1       |
| 0.000460331258181023 | -0.39550219402 | 1.00 | 3 | Dlgap4      |
| 0.000463315411693763 | -0.62922029232 | 1.00 | 3 | Slain2      |
| 0.000465081973699608 | -0.57186721533 | 1.00 | 3 | Abat        |
| 0.000466165247760366 | -0.33743565016 | 1.00 | 3 | Ptgis       |
| 0.000485978449687659 | -0.87484482418 | 1.00 | 3 | Rgs10       |
| 0.000495750584781785 | -1.37          | 1.00 | 3 | Lhfp12      |
| 0.000505728303909111 | -0.43702334001 | 1.00 | 3 | Pik3r1      |
| 0.000507831078011606 | -0.87360158746 | 1.00 | 3 | Rftn2       |
| 0.000507977765277323 | -0.60598633625 | 1.00 | 3 | Mfsd5       |
| 0.000510718920436506 | -1.06          | 1.00 | 3 | Kif1a       |
| 0.000510771041260888 | -0.60130954828 | 1.00 | 3 | Yif1a       |
| 0.000513523524954359 | -0.59586890274 | 1.00 | 3 | Ndn         |
| 0.000514662722678558 | -0.53283529309 | 1.00 | 3 | Carhsp1     |
| 0.000522143839533704 | -0.52304386109 | 1.00 | 3 | Cisd2       |
| 0.000529745380823759 | -0.83239992738 | 1.00 | 3 | A4galt      |
| 0.000533850949854699 | -0.49282569347 | 1.00 | 3 | Nasp        |
| 0.000545845113816364 | -0.65251539081 | 1.00 | 3 | Chmp4b      |
| 0.00054624198714085  | 0.419619537187 | 1.00 | 3 | Rac1        |
| 0.000546680579762002 | -0.47411129905 | 1.00 | 3 | Rasa2       |
| 0.000550399177948951 | -0.65820179471 | 1.00 | 3 | Dock7       |
| 0.000556067164548957 | -0.62647018482 | 1.00 | 3 | Cnpy4       |
| 0.00055758957683726  | -0.87636331837 | 1.00 | 3 | Sap18       |
| 0.000560219240709333 | -1.08          | 1.00 | 3 | Shisa4      |
| 0.000560302289709924 | -0.94411492830 | 1.00 | 3 | Echdc2      |
| 0.000566122383263672 | -0.30644879647 | 1.00 | 3 | Eif2s1      |
| 0.000573313097823268 | 0.718862045646 | 1.00 | 3 | Tnfaip1     |
| 0.000575136590071527 | -0.82966751822 | 1.00 | 3 | Mrps6       |
| 0.000577522182784081 | -0.62482200301 | 1.00 | 3 | Bambi       |
| 0.000581962982484387 | -0.26483060365 | 1.00 | 3 | Mpv17       |
| 0.000581963645804021 | -0.51642299706 | 1.00 | 3 | Rhbdf1      |
| 0.000582995154793644 | -0.25007971780 | 1.00 | 3 | Mgst1       |
| 0.000583252453417713 | 0.31           | 1.00 | 3 | Epn2        |
| 0.000588182934218596 | -0.28110092415 | 1.00 | 3 | Kdelr2      |
| 0.000591682065248314 | 0.630051793588 | 1.00 | 3 | Tmbim6      |
| 0.000592213412642463 | -0.37          | 1.00 | 3 | Crtap       |
| 0.000613931724257454 | -0.30028870234 | 1.00 | 3 | Atp1b1      |
| 0.00061480240759144  | -0.79          | 1.00 | 3 | Sgsm2       |
| 0.000616487984833184 | -0.46299124801 | 1.00 | 3 | Med13       |
| 0.000619358569281439 | -0.31596766031 | 1.00 | 3 | Arih1       |
| 0.000624633432225517 | -0.54300592424 | 1.00 | 3 | Prdm6       |
| 0.000627582911831764 | -0.44529238461 | 1.00 | 3 | Sh3bgrl     |
| 0.000631371229855395 | -0.33837611269 | 1.00 | 3 | Nagk        |
| 0.000633039439320864 | -0.75781722312 | 1.00 | 3 | Dram1       |
| 0.000640045169060923 | -0.39085788478 | 1.00 | 3 | Scara3      |
| 0.000643158066453273 | -0.28256787956 | 1.00 | 3 | Gadd45b     |
| 0.000650387226051222 | -0.63447844422 | 1.00 | 3 | Pcbd2       |
| 0.000650557560093078 | -0.61555532761 | 1.00 | 3 | Plin4       |

|                      |                |      |   |            |
|----------------------|----------------|------|---|------------|
| 0.000654940650180469 | -0.38248974441 | 1.00 | 3 | Myd88      |
| 0.000655290556704734 | -0.86686144675 | 1.00 | 3 | Rfc1       |
| 0.000663672970129994 | -0.43035092709 | 1.00 | 3 | Rad23a     |
| 0.000664774223710494 | -0.45447532454 | 1.00 | 3 | Jkamp      |
| 0.000668552820895961 | -0.31701944063 | 1.00 | 3 | Anpep      |
| 0.000679595872887808 | -0.68931009508 | 1.00 | 3 | Vgll3      |
| 0.000683291549255472 | -0.30140470744 | 1.00 | 3 | Clta       |
| 0.000686587171086877 | -0.30422022204 | 1.00 | 3 | Clcn4-2    |
| 0.000687299817057898 | -0.45621476688 | 1.00 | 3 | Nov        |
| 0.000690917351760283 | -0.81303301638 | 1.00 | 3 | Prrg3      |
| 0.000694293460348937 | -1.33          | 1.00 | 3 | Gm13889    |
| 0.000695546591554468 | -0.79366548242 | 1.00 | 3 | Rpp30      |
| 0.000696199683782991 | -0.71297279325 | 1.00 | 3 | Zbtb38     |
| 0.000696986022176848 | -0.39475422733 | 1.00 | 3 | Yars       |
| 0.000699196459704128 | -0.25367324904 | 1.00 | 3 | Gabarap    |
| 0.000720639449524591 | -0.42386876985 | 1.00 | 3 | Sdhc       |
| 0.000721231171540782 | 1.02           | 1.00 | 3 | Wdfy3      |
| 0.000729401379995893 | -0.54239439693 | 1.00 | 3 | Tep1       |
| 0.000730940129489623 | -0.35873081623 | 1.00 | 3 | Gng12      |
| 0.000734638868830579 | -0.51477001494 | 1.00 | 3 | Fmnl2      |
| 0.000738199400946344 | 0.285568261542 | 1.00 | 3 | Rps26      |
| 0.000742145092879816 | -0.70986062276 | 1.00 | 3 | Mast2      |
| 0.000745530862216945 | -0.63561848095 | 1.00 | 3 | Smim3      |
| 0.000747268026357087 | -0.38093087104 | 1.00 | 3 | Coq2       |
| 0.000753570415479698 | -0.90881322735 | 1.00 | 3 | Shisa3     |
| 0.000755548881449712 | 0.297316800333 | 1.00 | 3 | Pkp4       |
| 0.000755863930833909 | 0.359052672656 | 1.00 | 3 | Tpm4       |
| 0.000768493280781639 | -0.58865643929 | 1.00 | 3 | D19Bwg1357 |
| 0.000770997869383654 | -0.63641653051 | 1.00 | 3 | Dhrs1      |
| 0.000772223652963836 | -0.69637495590 | 1.00 | 3 | Mtfr1l     |
| 0.000780958918196405 | -0.86015269170 | 1.00 | 3 | Ebpl       |
| 0.000801496545274846 | -0.76515095720 | 1.00 | 3 | Gli3       |
| 0.000804781540709915 | -0.29815665593 | 1.00 | 3 | Rabgef1    |
| 0.000807586482662935 | -0.63153762255 | 1.00 | 3 | Ifngr2     |
| 0.000814011269408273 | -0.62658384457 | 1.00 | 3 | Ptpn9      |
| 0.000822829731849931 | -0.76562374554 | 1.00 | 3 | Il13ra1    |
| 0.000830467052185923 | -0.26478456639 | 1.00 | 3 | Ppl        |
| 0.000841776075574279 | -0.50098019107 | 1.00 | 3 | Csgalnact2 |
| 0.000847157525786308 | -0.29393797080 | 1.00 | 3 | Mrps17     |
| 0.000847372042831328 | -0.26264860735 | 1.00 | 3 | Slc11a2    |
| 0.000858610632076355 | -0.69004428840 | 1.00 | 3 | Cyp27a1    |
| 0.00087361523266413  | -0.60856003877 | 1.00 | 3 | Mpnd       |
| 0.000876987115914291 | -0.35          | 1.00 | 3 | Ggnbp2     |
| 0.000880312042200467 | -1.04          | 1.00 | 3 | B3gnt9     |
| 0.00088037644655837  | -0.27869229575 | 1.00 | 3 | Mbd1       |
| 0.000883062525085895 | -0.33          | 1.00 | 3 | Ppp2ca     |
| 0.000883274991542524 | -0.58334029149 | 1.00 | 3 | Bok        |
| 0.000883965918877237 | -0.79673142287 | 1.00 | 3 | Lnp        |
| 0.000888572744523896 | -1.11          | 1.00 | 3 | Slc16a9    |
| 0.00089943267739252  | -0.40959991091 | 1.00 | 3 | Samd4b     |
| 0.000899500460952892 | -0.95712516503 | 1.00 | 3 | Acyp2      |
| 0.000899965368129373 | -0.89694226158 | 1.00 | 3 | Zfp651     |
| 0.000900514438847192 | -0.30803362440 | 1.00 | 3 | Psma2      |
| 0.000901989703187688 | 1.16           | 1.00 | 3 | Map3k11    |
| 0.00090938818996968  | -0.38805457607 | 1.00 | 3 | Rnf19b     |
| 0.000914117136248781 | -0.29321120661 | 1.00 | 3 | Lynx1      |



|                      |                |      |   |             |
|----------------------|----------------|------|---|-------------|
| 0.000921261263601807 | -0.90436497459 | 1.00 | 3 | 2700029M09  |
| 0.000921593794194384 | -0.41444942518 | 1.00 | 3 | Cisd1       |
| 0.000925762135271432 | -0.42036004353 | 1.00 | 3 | Sec63       |
| 0.000932269660019741 | -0.44245001715 | 1.00 | 3 | Man2b1      |
| 0.000943175753647894 | -0.46535512670 | 1.00 | 3 | Yipf5       |
| 0.000950435473384166 | -0.33518112031 | 1.00 | 3 | Kpna4       |
| 0.000950795077661242 | -0.28457149881 | 1.00 | 3 | Rap1gds1    |
| 0.000954484701723573 | 0.255897044384 | 1.00 | 3 | Rpl32       |
| 0.000961263102502636 | 1.28           | 1.00 | 3 | Ppp1r13b    |
| 0.000964674601220943 | -0.46610135307 | 1.00 | 3 | Peak1       |
| 0.000965899992847592 | 0.574845399164 | 1.00 | 3 | Pdgfd       |
| 0.000970982262962411 | -0.27436010712 | 1.00 | 3 | Txn2        |
| 0.00097199454899293  | -1.52          | 1.00 | 3 | Hhip        |
| 0.000972885190931564 | -0.45178182265 | 1.00 | 3 | Eef2k       |
| 0.00097347357439764  | -0.36960743348 | 1.00 | 3 | Auts2       |
| 0.000974041279131489 | 0.59           | 1.00 | 3 | Hs6st1      |
| 0.000974512166576442 | -0.61466606283 | 1.00 | 3 | Tuba1c      |
| 0.00097838057585964  | -0.52          | 1.00 | 3 | Dnajc19     |
| 0.000980640172199126 | -0.52330462253 | 1.00 | 3 | Tspan31     |
| 0.000981044971827142 | -0.94411492830 | 1.00 | 3 | Id4         |
| 0.000981384119750667 | -0.30974854306 | 1.00 | 3 | Glt25d1     |
| 0.000993165926508592 | -0.25016948234 | 1.00 | 3 | Cst3        |
| 0.000995139483404225 | 0.780847060001 | 1.00 | 3 | Gnaq        |
| 0.00100287793101873  | -0.47733840956 | 1.00 | 3 | Tmem64      |
| 0.00100631201932037  | -0.69332557223 | 1.00 | 3 | Cnst        |
| 0.00100778263326194  | -0.25688155586 | 1.00 | 3 | Cuta        |
| 0.00101540147487504  | -0.78877645881 | 1.00 | 3 | Lcn2        |
| 0.00101793372783415  | -0.36901830102 | 1.00 | 3 | Bbx         |
| 0.00102261772580103  | -0.33226695224 | 1.00 | 3 | Selt        |
| 0.00103790403733545  | -0.52645409881 | 1.00 | 3 | Pls3        |
| 0.00104952954406835  | -0.40283562457 | 1.00 | 3 | Tmem127     |
| 0.00106270126584993  | 1.28           | 1.00 | 3 | Calml4      |
| 0.00106289035970836  | -0.37          | 1.00 | 3 | Trp53inp2   |
| 0.0010640871002258   | -0.53341295985 | 1.00 | 3 | Stk39       |
| 0.00107602760374878  | -0.30227337676 | 1.00 | 3 | Serpine1    |
| 0.00108438485069941  | -0.60784592306 | 1.00 | 3 | Sec22b      |
| 0.00110141314661059  | -0.52960591557 | 1.00 | 3 | Ppp1r15b    |
| 0.00110620628955804  | 0.616132739939 | 1.00 | 3 | Taok2       |
| 0.00110768255546455  | -0.44496314373 | 1.00 | 3 | Nhp2        |
| 0.00111254126457631  | -0.56512794546 | 1.00 | 3 | Tmem126a    |
| 0.0011147718614547   | -0.41448418355 | 1.00 | 3 | Psme4       |
| 0.00112014357467863  | -0.28424060526 | 1.00 | 3 | Fam20b      |
| 0.00112548428374365  | -0.49526309599 | 1.00 | 3 | Pcsk5       |
| 0.00113679200585241  | -0.67          | 1.00 | 3 | B3gat3      |
| 0.00113695093063368  | -0.70164669504 | 1.00 | 3 | Hddc2       |
| 0.0011390808054965   | -0.95599092712 | 1.00 | 3 | Ramp1       |
| 0.00117651334881377  | -0.76148807460 | 1.00 | 3 | Sord        |
| 0.00117816992448866  | -0.30309912770 | 1.00 | 3 | Fam210a     |
| 0.001180809193179    | -0.96803294751 | 1.00 | 3 | Tlr2        |
| 0.00118331866616386  | -0.30602683214 | 1.00 | 3 | Sep15       |
| 0.00119019425928507  | -0.34050997880 | 1.00 | 3 | Prdx3       |
| 0.00119025827699474  | -0.47          | 1.00 | 3 | Pdha1       |
| 0.0012038526917731   | -0.52235971754 | 1.00 | 3 | Nop56       |
| 0.00120796965586883  | -0.40963399428 | 1.00 | 3 | Atp6v1b2    |
| 0.00121363559067328  | -0.73633543881 | 1.00 | 3 | Plgrkt      |
| 0.00121488857318649  | 0.282221276313 | 1.00 | 3 | 2810428115R |

|                     |                |      |   |             |
|---------------------|----------------|------|---|-------------|
| 0.00121563438960386 | -0.71289636402 | 1.00 | 3 | Crot        |
| 0.00122056354645586 | 0.613490969473 | 1.00 | 3 | Sec14I1     |
| 0.00124358274582558 | -0.54197994333 | 1.00 | 3 | Kat2b       |
| 0.00124371021135053 | -0.30447490179 | 1.00 | 3 | Fem1b       |
| 0.00124571979042799 | 0.858959859670 | 1.00 | 3 | Lysmd2      |
| 0.00124647965158971 | -0.54304868280 | 1.00 | 3 | Ehmt2       |
| 0.00125294297265777 | 0.458084152061 | 1.00 | 3 | Utrn        |
| 0.00127730276801854 | -0.48227044682 | 1.00 | 3 | Praf2       |
| 0.00129348194641263 | -0.95040245973 | 1.00 | 3 | Tmem29      |
| 0.00130030898055229 | -0.78261469932 | 1.00 | 3 | 1810026J23F |
| 0.00130460099139612 | -0.78199607882 | 1.00 | 3 | Cyp2j6      |
| 0.00134106733488877 | -0.58794644170 | 1.00 | 3 | Derl2       |
| 0.00135100274615396 | -0.47663336849 | 1.00 | 3 | Scfd1       |
| 0.00135160630470714 | -0.32395902519 | 1.00 | 3 | Med15       |
| 0.00135397256656656 | 0.582886593536 | 1.00 | 3 | Sh3bgrl3    |
| 0.00135770461696842 | 0.885716488873 | 1.00 | 3 | Brms1       |
| 0.00136049915074973 | -0.31897370562 | 1.00 | 3 | Glg1        |
| 0.0013753884632893  | -0.82915427117 | 1.00 | 3 | Aoc3        |
| 0.00138744194815124 | -0.38363070783 | 1.00 | 3 | Myo5a       |
| 0.00141251060694952 | -0.60797730771 | 1.00 | 3 | Bccip       |
| 0.00141500601072693 | 0.733358809828 | 1.00 | 3 | Hspa12b     |
| 0.00141645147948131 | -0.41348667724 | 1.00 | 3 | Ssbp1       |
| 0.00142536756538941 | -0.49039218466 | 1.00 | 3 | Mrpl27      |
| 0.00144949466275616 | -0.31361391010 | 1.00 | 3 | Srgap3      |
| 0.00148906507711248 | -0.79          | 1.00 | 3 | Slc35b2     |
| 0.00150096549189886 | 0.274863450383 | 1.00 | 3 | Tmem176b    |
| 0.00151894721854623 | -0.36340332549 | 1.00 | 3 | Elof1       |
| 0.00153202294433379 | 0.807169226941 | 1.00 | 3 | Crif2       |
| 0.00153572985314884 | -0.26608994569 | 1.00 | 3 | Park7       |
| 0.00154225863457397 | -1.02          | 1.00 | 3 | Metrn1      |
| 0.00155741862273403 | -0.37136614076 | 1.00 | 3 | Nfkb2       |
| 0.00156088209066566 | -0.37756409071 | 1.00 | 3 | Fdx1        |
| 0.00157049041052159 | 0.519326192218 | 1.00 | 3 | Sat1        |
| 0.00157854840681048 | -0.41082487864 | 1.00 | 3 | Snx7        |
| 0.0015951128332027  | -0.60601693941 | 1.00 | 3 | Gga2        |
| 0.00159702894744642 | -0.63383302393 | 1.00 | 3 | Dap3        |
| 0.00160431298796024 | -0.49382802609 | 1.00 | 3 | Heatr5b     |
| 0.00160840808457787 | -0.42596892917 | 1.00 | 3 | Setbp1      |
| 0.00161965977324061 | -0.45231328295 | 1.00 | 3 | Rxra        |
| 0.00163248028543741 | -0.27323150168 | 1.00 | 3 | Kdm6b       |
| 0.00163255186541053 | -0.92563718054 | 1.00 | 3 | Cluap1      |
| 0.00163953824960246 | 0.289993077256 | 1.00 | 3 | App         |
| 0.0016683765378209  | -1.28          | 1.00 | 3 | Dync2li1    |
| 0.00167336771245788 | -0.27483921982 | 1.00 | 3 | Yipf3       |
| 0.00168657331201707 | -0.36830976905 | 1.00 | 3 | Mocs2       |
| 0.00168996784565893 | -0.49753843195 | 1.00 | 3 | Mid1ip1     |
| 0.00169700985099109 | -0.27          | 1.00 | 3 | Cd55        |
| 0.00169819320626577 | 0.896479221754 | 1.00 | 3 | Thbs1       |
| 0.00169971707349984 | -0.36586502346 | 1.00 | 3 | Socs2       |
| 0.00170206707818162 | -0.38802903111 | 1.00 | 3 | Plekhj1     |
| 0.00172248966266348 | 0.569272231662 | 1.00 | 3 | Eif4ebp3    |
| 0.00172454396329295 | -0.32933681485 | 1.00 | 3 | Mrpl54      |
| 0.00175707772719459 | 0.875155133945 | 1.00 | 3 | Skap2       |
| 0.00177015219463027 | -1.31          | 1.00 | 3 | Mtus2       |
| 0.00177125699008684 | -0.42153348297 | 1.00 | 3 | Mif         |
| 0.00177989353451598 | 0.358534284542 | 1.00 | 3 | Pdlim1      |

|                     |                |      |   |             |
|---------------------|----------------|------|---|-------------|
| 0.0017822675913726  | 0.483994637431 | 1.00 | 3 | Nck2        |
| 0.00178314388902579 | -0.41          | 1.00 | 3 | Wdr60       |
| 0.00178518436949291 | -0.55783472991 | 1.00 | 3 | 0610037L13F |
| 0.00179049116375669 | -0.78682596772 | 1.00 | 3 | Map6        |
| 0.00179596914065251 | -0.45443853345 | 1.00 | 3 | Ibtk        |
| 0.00180875108298597 | -0.43960460364 | 1.00 | 3 | Dopey1      |
| 0.00181828027824399 | -0.26433631776 | 1.00 | 3 | Calu        |
| 0.00182180368307384 | -0.43999854458 | 1.00 | 3 | Stox2       |
| 0.00183937375290784 | 0.474184180293 | 1.00 | 3 | Cabin1      |
| 0.00184539925007033 | -0.73806530081 | 1.00 | 3 | Max         |
| 0.00186149617625256 | -0.30405191591 | 1.00 | 3 | Parp3       |
| 0.00186208768189421 | -0.27          | 1.00 | 3 | Sepr1       |
| 0.00187971331390307 | 0.866833321575 | 1.00 | 3 | Thsd7a      |
| 0.00188207918213815 | -0.76439415320 | 1.00 | 3 | Tmem175     |
| 0.00189655443097431 | -0.41613555783 | 1.00 | 3 | Nf1         |
| 0.00189762446611344 | -0.30125336757 | 1.00 | 3 | Rer1        |
| 0.0018981792100518  | -0.26360548280 | 1.00 | 3 | Timm17a     |
| 0.001909281804873   | -0.67254402267 | 1.00 | 3 | Pkdcc       |
| 0.00193663118449626 | 0.77           | 1.00 | 3 | Casd1       |
| 0.00193856113849688 | -0.27406027828 | 1.00 | 3 | Golt1b      |
| 0.00195973346041223 | -0.99023686295 | 1.00 | 3 | Cacna1c     |
| 0.00197357380146186 | -0.69639315277 | 1.00 | 3 | Aimp2       |
| 0.00199309964348561 | -0.70522302002 | 1.00 | 3 | Osbpl1a     |
| 0.00199977987602229 | -0.37611844909 | 1.00 | 3 | Ctps2       |
| 0.0020059644425803  | -0.32540635306 | 1.00 | 3 | Asun        |
| 0.00201866392012959 | -0.29039988797 | 1.00 | 3 | Dtx3        |
| 0.00204139846553015 | 0.901989495642 | 1.00 | 3 | Etv6        |
| 0.00204592493596914 | -0.94365314117 | 1.00 | 3 | Laptm4b     |
| 0.0020555673150074  | -0.68442472380 | 1.00 | 3 | Nicn1       |
| 0.00208389744899523 | -0.29968290030 | 1.00 | 3 | Hdgfrp3     |
| 0.00208650068370574 | 0.458543797196 | 1.00 | 3 | Fam206a     |
| 0.00209610721176805 | -0.30702170933 | 1.00 | 3 | Sema5a      |
| 0.00210014337141992 | -1.34          | 1.00 | 3 | Zfp354c     |
| 0.00210316196163502 | -0.81858672717 | 1.00 | 3 | Cpox        |
| 0.00213179524571749 | -0.80092811967 | 1.00 | 3 | Wdr6        |
| 0.00213478094205171 | -0.46955251551 | 1.00 | 3 | Htra2       |
| 0.00214712381498179 | -0.27068643695 | 1.00 | 3 | Ank         |
| 0.00215026342026809 | -0.46513112325 | 1.00 | 3 | Zc2hc1a     |
| 0.00217883160290092 | -0.25802029971 | 1.00 | 3 | 1700123O20I |
| 0.00218050187642981 | -0.47376509860 | 1.00 | 3 | Fzd7        |
| 0.00219561514912652 | -0.37485875039 | 1.00 | 3 | Pygb        |
| 0.00220045143873818 | -0.69093480635 | 1.00 | 3 | Mrps18a     |
| 0.00221248637904629 | -0.39969247828 | 1.00 | 3 | Surf1       |
| 0.00221932528004633 | -0.82800460003 | 1.00 | 3 | Micu2       |
| 0.00224833545684047 | -0.26275779252 | 1.00 | 3 | Hmgn1       |
| 0.0022564463060518  | -0.53          | 1.00 | 3 | 2310039H08I |
| 0.00226274803697878 | 1.42           | 1.00 | 3 | Stxbp6      |
| 0.00227406156630501 | -0.31481576949 | 1.00 | 3 | Snx12       |
| 0.00228819532752283 | -0.31830995207 | 1.00 | 3 | Alkbh5      |
| 0.00229227946833081 | -0.40999197725 | 1.00 | 3 | Ctr9        |
| 0.00231763901900122 | -0.95          | 1.00 | 3 | Slc20a2     |
| 0.00232499978446008 | -0.61674320951 | 1.00 | 3 | Ten1        |
| 0.00232728026970143 | -0.42695616114 | 1.00 | 3 | Rufy2       |
| 0.00232793045882375 | -0.39796459021 | 1.00 | 3 | Gab1        |
| 0.0023293833515267  | -0.88249022745 | 1.00 | 3 | Arsk        |
| 0.00238029309948155 | 0.868473176052 | 1.00 | 3 | Rfk         |

|                     |                |      |   |            |
|---------------------|----------------|------|---|------------|
| 0.00240102857476239 | -0.48920781170 | 1.00 | 3 | Ccdc88a    |
| 0.00242521269211062 | -0.25218800414 | 1.00 | 3 | Slc37a3    |
| 0.00243347532576429 | -0.85569467516 | 1.00 | 3 | Socs5      |
| 0.00246352196200978 | 0.314865406942 | 1.00 | 3 | Al987944   |
| 0.00248631633355719 | -0.42893777535 | 1.00 | 3 | Tmem87b    |
| 0.00250583776334637 | 0.29           | 1.00 | 3 | Tbl1xr1    |
| 0.00251966763496181 | -0.42392680849 | 1.00 | 3 | Ssh2       |
| 0.0025240335128053  | -0.51153502105 | 1.00 | 3 | Tkt        |
| 0.00253775067486852 | -0.59999154494 | 1.00 | 3 | Fxr2       |
| 0.00254495118780471 | -0.88279184401 | 1.00 | 3 | Tbxa2r     |
| 0.00254743527107465 | -0.26588635131 | 1.00 | 3 | Ncbp2      |
| 0.00256110809252465 | -0.60010686099 | 1.00 | 3 | Gsk3a      |
| 0.00256474483654304 | -0.38227240331 | 1.00 | 3 | Pgd        |
| 0.00260432042233165 | -0.25221075598 | 1.00 | 3 | Snx22      |
| 0.00260905856290536 | -0.66252003475 | 1.00 | 3 | Slc7a6     |
| 0.00262245244433732 | 0.379459199507 | 1.00 | 3 | Wipi1      |
| 0.00262683179912637 | -0.27184773243 | 1.00 | 3 | Cc2d2a     |
| 0.00264812946947764 | -0.37189828777 | 1.00 | 3 | Sars       |
| 0.00266839639326078 | -0.68069334178 | 1.00 | 3 | Arhgef40   |
| 0.00269662389316344 | -0.36784470546 | 1.00 | 3 | Kdm6a      |
| 0.00273961069205804 | -0.65056773639 | 1.00 | 3 | AW549877   |
| 0.00273991443094693 | -0.44935510854 | 1.00 | 3 | Ndufs4     |
| 0.00274754301766542 | -0.52466357822 | 1.00 | 3 | Fech       |
| 0.00275855445887591 | -0.61739104957 | 1.00 | 3 | Naga       |
| 0.00277115197022695 | 0.93           | 1.00 | 3 | Efna1      |
| 0.00279463665478305 | -0.30662173121 | 1.00 | 3 | Ube2j1     |
| 0.00279530750533368 | -0.54578179133 | 1.00 | 3 | Plekhg2    |
| 0.00280774470819812 | -0.60          | 1.00 | 3 | Dbn1       |
| 0.00280801967630645 | -0.66095901294 | 1.00 | 3 | Emd        |
| 0.00281036058902446 | -0.41461370286 | 1.00 | 3 | Chp1       |
| 0.00282468225352464 | -0.77699259124 | 1.00 | 3 | Gucy1a2    |
| 0.00282801839557971 | 0.608998400149 | 1.00 | 3 | Icam1      |
| 0.00284207379355833 | -0.27249464479 | 1.00 | 3 | Man1c1     |
| 0.00284498841161435 | -0.33129127773 | 1.00 | 3 | Enah       |
| 0.00285186213532203 | -0.94655997829 | 1.00 | 3 | Spsb1      |
| 0.00285280537677752 | -0.58889232263 | 1.00 | 3 | Stim1      |
| 0.00289148544649203 | 0.711956646503 | 1.00 | 3 | Jam2       |
| 0.00289659389935028 | -0.39784206009 | 1.00 | 3 | Srxn1      |
| 0.00290292212451361 | -0.61492288989 | 1.00 | 3 | Shmt2      |
| 0.00290504219004399 | -1.04          | 1.00 | 3 | Sorl1      |
| 0.00290562462538464 | -0.26808037797 | 1.00 | 3 | Cyb5       |
| 0.00293754434743901 | -0.50292032825 | 1.00 | 3 | Impad1     |
| 0.00296684620339551 | 0.782505238753 | 1.00 | 3 | Gltp       |
| 0.00296699349827942 | -0.50          | 1.00 | 3 | Slc25a12   |
| 0.00297397130287594 | 0.786375737426 | 1.00 | 3 | 2810025M15 |
| 0.00297483168067547 | -0.59356557779 | 1.00 | 3 | Tbc1d10b   |
| 0.00303722746812241 | 0.893852725864 | 1.00 | 3 | Ets1       |
| 0.00305272228289632 | -1.15          | 1.00 | 3 | Rasl12     |
| 0.00305327912600436 | -0.57828627812 | 1.00 | 3 | Tbc1d9b    |
| 0.00307964026504814 | 0.271147618167 | 1.00 | 3 | Dusp1      |
| 0.00308751172742172 | -0.29025246294 | 1.00 | 3 | Pygm       |
| 0.00310616010102369 | -1.02          | 1.00 | 3 | Hspb6      |
| 0.00312237546234813 | -1.00          | 1.00 | 3 | Irs2       |
| 0.00312494981668615 | -0.96332831790 | 1.00 | 3 | Rab3il1    |
| 0.00313370845108941 | -0.77465846730 | 1.00 | 3 | Spry1      |
| 0.00315128123280747 | -0.28939644235 | 1.00 | 3 | Zfp36l2    |

|                     |                |      |   |             |
|---------------------|----------------|------|---|-------------|
| 0.00315285106988343 | -0.29395793267 | 1.00 | 3 | Gas2l1      |
| 0.00316798229885768 | -0.82954560725 | 1.00 | 3 | Itih4       |
| 0.00318025473001353 | 0.429542084720 | 1.00 | 3 | G6pc3       |
| 0.00318565972159885 | -0.51          | 1.00 | 3 | Igbp1       |
| 0.0032042690525212  | 0.609487302770 | 1.00 | 3 | Shroom3     |
| 0.00321555984613436 | -0.39446113309 | 1.00 | 3 | Vps16       |
| 0.00324446813278456 | -0.28652000326 | 1.00 | 3 | Gba         |
| 0.00330782388054305 | -0.32248778762 | 1.00 | 3 | Plod3       |
| 0.00331243933740023 | -0.82002613353 | 1.00 | 3 | Thsd4       |
| 0.00331369990871283 | -0.76589555887 | 1.00 | 3 | Gclc        |
| 0.00332404233075077 | -0.95753794863 | 1.00 | 3 | Ephb3       |
| 0.00335561040037398 | 0.336273214552 | 1.00 | 3 | Fads1       |
| 0.00337557930087685 | -0.68958663573 | 1.00 | 3 | Ergic1      |
| 0.00337691791336174 | -0.38087168906 | 1.00 | 3 | Rdm1        |
| 0.00337972690915974 | 0.252463999266 | 1.00 | 3 | 2700081O15I |
| 0.00339246918337478 | -0.69217373723 | 1.00 | 3 | Map2k7      |
| 0.00340060269722365 | -0.68          | 1.00 | 3 | Spred1      |
| 0.0034081281140528  | 0.396685827598 | 1.00 | 3 | Ctnna1      |
| 0.00343102140073554 | -0.59531207922 | 1.00 | 3 | Ddt         |
| 0.00344958198767529 | 0.901359144001 | 1.00 | 3 | Mrps5       |
| 0.0035178110526229  | -0.38755756703 | 1.00 | 3 | Upf3a       |
| 0.00354097720861243 | -0.58873114012 | 1.00 | 3 | Ppp1r7      |
| 0.00354699725944066 | -0.54360490188 | 1.00 | 3 | Med8        |
| 0.00359975745546764 | -1.09          | 1.00 | 3 | Agpat2      |
| 0.00360609055077663 | 0.799041712836 | 1.00 | 3 | Ktn1        |
| 0.00363651267442947 | -0.38528154138 | 1.00 | 3 | Cdk13       |
| 0.00366500358127916 | -0.40239961380 | 1.00 | 3 | Plxnb2      |
| 0.00367568183283931 | -0.27984472018 | 1.00 | 3 | Cdc37       |
| 0.00369288653659376 | -0.51399388533 | 1.00 | 3 | Map2k1      |
| 0.00370521166958985 | -1.20          | 1.00 | 3 | Prss12      |
| 0.00370825396962697 | -0.68367781802 | 1.00 | 3 | Lrig3       |
| 0.00371526342573501 | -0.51765210734 | 1.00 | 3 | Dpp9        |
| 0.00377107773668519 | 0.267653498004 | 1.00 | 3 | Abhd14a     |
| 0.00379344663056786 | 0.788740153343 | 1.00 | 3 | Ptplad2     |
| 0.00385675807882308 | -0.74493698118 | 1.00 | 3 | Slc25a46    |
| 0.00388794154342415 | -0.42387332806 | 1.00 | 3 | Pla2g15     |
| 0.00391101920549177 | -0.61823333247 | 1.00 | 3 | Osbpl5      |
| 0.00392993013043176 | -0.52093674214 | 1.00 | 3 | Fnbp1       |
| 0.00396015611355115 | -0.46          | 1.00 | 3 | Bet1        |
| 0.00400707534250519 | -0.50623957604 | 1.00 | 3 | Psd3        |
| 0.00401596914504085 | 0.523067547723 | 1.00 | 3 | Usp10       |
| 0.00401807189021075 | -0.25185559638 | 1.00 | 3 | Exosc4      |
| 0.00402548518091798 | 0.720267894702 | 1.00 | 3 | Smap2       |
| 0.00405762303866701 | -0.41986070930 | 1.00 | 3 | Tmem248     |
| 0.00405976693668643 | -0.67045185871 | 1.00 | 3 | Ift43       |
| 0.00410013620841573 | -0.53847904058 | 1.00 | 3 | Dcun1d3     |
| 0.00410355243408252 | -0.75629129435 | 1.00 | 3 | Ormdl3      |
| 0.00415095385555902 | -0.72901076366 | 1.00 | 3 | Zfc3h1      |
| 0.00417434935294892 | 0.782571705817 | 1.00 | 3 | Med4        |
| 0.00418891834349084 | -0.44298038046 | 1.00 | 3 | 2510009E07F |
| 0.00422142242321369 | -0.44708262666 | 1.00 | 3 | Fam53c      |
| 0.00427307028897805 | -0.55979304681 | 1.00 | 3 | Aup1        |
| 0.00427344386840574 | -0.53235031864 | 1.00 | 3 | Hibadh      |
| 0.00432773290851492 | -0.31026289655 | 1.00 | 3 | Ddx50       |
| 0.00433144891560049 | -0.51093206752 | 1.00 | 3 | Rcbtb2      |
| 0.00433699361197971 | -0.26482692650 | 1.00 | 3 | Hand2       |



|                     |                |      |   |            |
|---------------------|----------------|------|---|------------|
| 0.00434215932217948 | -0.49          | 1.00 | 3 | Xpnpep1    |
| 0.00440885341229981 | -0.42933018192 | 1.00 | 3 | Dmpk       |
| 0.00445512312135551 | -0.93119264681 | 1.00 | 3 | Npr3       |
| 0.0044745412433838  | -0.32044499802 | 1.00 | 3 | Ncoa6      |
| 0.00447771545300215 | -0.78          | 1.00 | 3 | Ehbp1      |
| 0.00449757254394315 | -0.67872677281 | 1.00 | 3 | P2rx4      |
| 0.00453329320286347 | 0.742922635672 | 1.00 | 3 | Ptbp3      |
| 0.00464127156712237 | -0.40521680919 | 1.00 | 3 | Trafd1     |
| 0.00465373988740681 | 0.664915331910 | 1.00 | 3 | Fam63b     |
| 0.00468028058612932 | -0.50460146581 | 1.00 | 3 | Txndc16    |
| 0.00468080552587223 | -0.67440934685 | 1.00 | 3 | Prkaa1     |
| 0.00478508893319896 | -0.28654507253 | 1.00 | 3 | G6pdx      |
| 0.00479092406128508 | -0.31506290819 | 1.00 | 3 | Rab21      |
| 0.00483891145968873 | 0.855696396083 | 1.00 | 3 | Pla2g16    |
| 0.00488924260689043 | 0.583814291728 | 1.00 | 3 | Nmt2       |
| 0.00489068474399441 | -0.49          | 1.00 | 3 | Cc2d1b     |
| 0.00491766359266673 | 0.87           | 1.00 | 3 | Nsf        |
| 0.00495611928739978 | -0.31          | 1.00 | 3 | Dctn6      |
| 0.00499840509807491 | 0.795484903892 | 1.00 | 3 | Sorbs2     |
| 0.00501036409480304 | 0.656356155851 | 1.00 | 3 | Jup        |
| 0.00502617608391887 | -0.28092007002 | 1.00 | 3 | Atf1       |
| 0.00504242560293486 | -0.39846807054 | 1.00 | 3 | Lrp3       |
| 0.00505904200223622 | -0.87777298016 | 1.00 | 3 | Exoc4      |
| 0.0050692167923437  | -0.47543003853 | 1.00 | 3 | Mpzl1      |
| 0.00507243674691977 | -0.58          | 1.00 | 3 | Tspan17    |
| 0.00510097317232555 | -0.84524905177 | 1.00 | 3 | Sphk1      |
| 0.00511148570140386 | -0.51537763928 | 1.00 | 3 | Fat4       |
| 0.00511651354818999 | 0.702844461530 | 1.00 | 3 | Adss       |
| 0.00515091507281254 | -0.55804960963 | 1.00 | 3 | Ube2k      |
| 0.00515187420228374 | -0.37209766675 | 1.00 | 3 | Palm       |
| 0.00517461974521792 | 0.25           | 1.00 | 3 | Uso1       |
| 0.00519024395898526 | -0.57073813474 | 1.00 | 3 | Hsd17b4    |
| 0.00521718669117006 | 0.983820964937 | 1.00 | 3 | Epb4.1     |
| 0.00524617790877024 | -0.30089330800 | 1.00 | 3 | Ints6      |
| 0.00526148343871076 | -0.53446355263 | 1.00 | 3 | Idh3a      |
| 0.00527163588957434 | 0.762748927154 | 1.00 | 3 | Tmx1       |
| 0.0052820395326848  | -0.39970990828 | 1.00 | 3 | 1810055G02 |
| 0.00529301399465154 | -0.40947707040 | 1.00 | 3 | Chmp1a     |
| 0.00529435596624848 | -0.36025754154 | 1.00 | 3 | Emc2       |
| 0.00532867824726224 | -0.50191358036 | 1.00 | 3 | Pde4a      |
| 0.00535123817144312 | -0.54432526510 | 1.00 | 3 | Kif3a      |
| 0.00543208189506258 | -0.93251753948 | 1.00 | 3 | Rnf150     |
| 0.00543231619156001 | 0.999528965532 | 1.00 | 3 | Tmtc2      |
| 0.00543270174015697 | 0.619806992907 | 1.00 | 3 | Dazap2     |
| 0.005491898461596   | -0.35          | 1.00 | 3 | Tm9sf4     |
| 0.00549808189606293 | -1.27          | 1.00 | 3 | Wif1       |
| 0.00552647315168334 | 0.35           | 1.00 | 3 | Iqgap1     |
| 0.005526499713266   | -0.30208712606 | 1.00 | 3 | Cops4      |
| 0.00554697049096923 | -0.50385091565 | 1.00 | 3 | Slmo2      |
| 0.00563304896103397 | -0.32045377668 | 1.00 | 3 | Ndufs2     |
| 0.00563549131963463 | -0.40          | 1.00 | 3 | Edem1      |
| 0.00568249527448463 | -0.60314481670 | 1.00 | 3 | Twf1       |
| 0.00576268327447923 | -0.96511816636 | 1.00 | 3 | Zfp592     |
| 0.005773718331149   | -0.39704715982 | 1.00 | 3 | Tshz2      |
| 0.00579864233586419 | -1.12          | 1.00 | 3 | Epha3      |
| 0.0058121701852729  | -0.58939545790 | 1.00 | 3 | Rab2b      |

|                     |                |      |   |            |
|---------------------|----------------|------|---|------------|
| 0.00581541147752247 | -0.26056343480 | 1.00 | 3 | Copz1      |
| 0.00589530351664405 | -1.31          | 1.00 | 3 | Saa3       |
| 0.005908390341263   | -0.60          | 1.00 | 3 | Dut        |
| 0.00590853673270929 | -1.06          | 1.00 | 3 | Rgs5       |
| 0.00591611906671101 | -0.81076389459 | 1.00 | 3 | Fbxw5      |
| 0.00593506405074152 | 1.01           | 1.00 | 3 | Orai1      |
| 0.00595440282310368 | -0.48403693885 | 1.00 | 3 | Egr2       |
| 0.00598071746983834 | -0.45626593873 | 1.00 | 3 | Grik5      |
| 0.0060194784707988  | -0.89479853142 | 1.00 | 3 | Ifi30      |
| 0.00602062907020204 | -0.35008627507 | 1.00 | 3 | Galnt2     |
| 0.00604912474027451 | -0.49080617762 | 1.00 | 3 | Jdp2       |
| 0.00607295296254372 | -0.36081166198 | 1.00 | 3 | Tmem263    |
| 0.00607403031392602 | -0.57744770877 | 1.00 | 3 | Kctd17     |
| 0.00611098017383417 | -0.70497541217 | 1.00 | 3 | Lmod1      |
| 0.00611372908601453 | -0.27586880223 | 1.00 | 3 | Decr1      |
| 0.0061169480486605  | 0.894072141523 | 1.00 | 3 | Lbr        |
| 0.00611899583069082 | -0.27726164170 | 1.00 | 3 | Araf       |
| 0.00612007536599813 | -0.34424253733 | 1.00 | 3 | Mon2       |
| 0.00613881272028516 | -0.74261231265 | 1.00 | 3 | Akr7a5     |
| 0.00615423292242871 | -0.44351347785 | 1.00 | 3 | Rabep1     |
| 0.00616588867126574 | -0.28          | 1.00 | 3 | Mrpl43     |
| 0.00618709560227835 | 0.780960863440 | 1.00 | 3 | Slc20a1    |
| 0.00621743899557592 | -0.33838582955 | 1.00 | 3 | Pla2g4a    |
| 0.00622915629063593 | 0.784767498519 | 1.00 | 3 | Hint2      |
| 0.00638888558840638 | -0.28790780177 | 1.00 | 3 | Ltbr       |
| 0.00642565620914807 | -0.35455782918 | 1.00 | 3 | Dmd        |
| 0.00649967486219277 | 0.970762230676 | 1.00 | 3 | Zfp326     |
| 0.00650633305375266 | -1.06          | 1.00 | 3 | Hmgcs1     |
| 0.00652317409922106 | -0.53740319630 | 1.00 | 3 | Cdc37l1    |
| 0.00655275918597461 | -0.51407665765 | 1.00 | 3 | Rprd1b     |
| 0.00659804085323965 | -0.59596826353 | 1.00 | 3 | Srprb      |
| 0.00662087417434213 | 0.62           | 1.00 | 3 | Plxna4     |
| 0.00665167167594995 | -0.42629874763 | 1.00 | 3 | Naa60      |
| 0.00665820764102757 | -0.62137015284 | 1.00 | 3 | Ubp1       |
| 0.00667227750643149 | -0.25244077323 | 1.00 | 3 | Exoc3      |
| 0.00667690825335899 | -0.31103042164 | 1.00 | 3 | Lonp2      |
| 0.0066928799870494  | -0.57149304898 | 1.00 | 3 | Tmem214    |
| 0.00669560815829849 | -0.26724863334 | 1.00 | 3 | Rusc1      |
| 0.00672527275982414 | -0.55145656766 | 1.00 | 3 | Pawr       |
| 0.00674444891610755 | -0.59916854346 | 1.00 | 3 | Pcdh7      |
| 0.00676452861787549 | -0.62283602959 | 1.00 | 3 | Mrps11     |
| 0.00677475986739856 | -0.57791418200 | 1.00 | 3 | Fgf1       |
| 0.00679561414552065 | -0.65575215372 | 1.00 | 3 | Dtymk      |
| 0.00681180946734067 | -0.80944910560 | 1.00 | 3 | Mrps12     |
| 0.00681996990387683 | -0.61334287812 | 1.00 | 3 | Klhl21     |
| 0.00682521289653532 | 1.27           | 1.00 | 3 | Hscb       |
| 0.00693987831377881 | -0.40802615218 | 1.00 | 3 | Meis1      |
| 0.00693993219982462 | -0.42260855190 | 1.00 | 3 | Rp9        |
| 0.00695306987500089 | -0.77624665076 | 1.00 | 3 | Itih2      |
| 0.00696258288596939 | -0.99065822980 | 1.00 | 3 | Clybl      |
| 0.00700205910626062 | -0.47502537590 | 1.00 | 3 | D3Ertd254e |
| 0.00701727541351556 | -0.31317423644 | 1.00 | 3 | Tm2d2      |
| 0.00705722734971685 | -0.40          | 1.00 | 3 | Mif4gd     |
| 0.00712114567434629 | -0.36464916346 | 1.00 | 3 | Ppm1b      |
| 0.00712853094552243 | -0.40752811488 | 1.00 | 3 | Tcerg1     |
| 0.00719336391543332 | 1.36           | 1.00 | 3 | Hrct1      |

|                     |                |      |   |           |
|---------------------|----------------|------|---|-----------|
| 0.00725285227789368 | -0.42833671767 | 1.00 | 3 | Rab22a    |
| 0.00728253527350085 | -0.59439487492 | 1.00 | 3 | Poldip2   |
| 0.00736535893451423 | -0.36          | 1.00 | 3 | Slc4a3    |
| 0.00737407457569077 | 0.698282377829 | 1.00 | 3 | Tanc1     |
| 0.0074076721251052  | -0.71739965903 | 1.00 | 3 | Oard1     |
| 0.00742770921209149 | -1.07          | 1.00 | 3 | Fbxl22    |
| 0.00748986214029701 | -0.48          | 1.00 | 3 | Golga5    |
| 0.0075183123946231  | -1.13          | 1.00 | 3 | Itga7     |
| 0.00754806338155722 | -0.90191756710 | 1.00 | 3 | Aff2      |
| 0.00755691557218516 | -0.65311797465 | 1.00 | 3 | Slc22a17  |
| 0.00755853730198156 | -1.47          | 1.00 | 3 | Kcnmb1    |
| 0.0075609404383702  | -0.58625625996 | 1.00 | 3 | Acp2      |
| 0.00757406166984329 | -0.33781474567 | 1.00 | 3 | Rabgap1   |
| 0.00767086477383854 | -0.36113761653 | 1.00 | 3 | Fam193a   |
| 0.00768081818439171 | -0.46392568899 | 1.00 | 3 | Kcnj15    |
| 0.00771325359625916 | -0.67407151491 | 1.00 | 3 | Rnf123    |
| 0.00774771371454046 | -0.98057181067 | 1.00 | 3 | Tpm2      |
| 0.0077660247956383  | -0.40405842579 | 1.00 | 3 | Fkbp14    |
| 0.0078106506500731  | -0.37686875150 | 1.00 | 3 | Dnal4     |
| 0.00786306453450128 | -0.40200492378 | 1.00 | 3 | Slc9a1    |
| 0.00787591253346691 | -0.25677234320 | 1.00 | 3 | Pld3      |
| 0.00791896472907802 | -0.60029314252 | 1.00 | 3 | Ifi35     |
| 0.00792381671108719 | -0.26818758081 | 1.00 | 3 | Akr1e1    |
| 0.00794699787200844 | -0.41550930488 | 1.00 | 3 | Senp7     |
| 0.00821469736060115 | -0.25685109712 | 1.00 | 3 | Mfsd10    |
| 0.00825468889717129 | -0.32518296425 | 1.00 | 3 | Lrrk1     |
| 0.00827908055408836 | -0.47          | 1.00 | 3 | Cep120    |
| 0.00828358327851842 | -0.66352587018 | 1.00 | 3 | Rbl2      |
| 0.00833291917443489 | 0.257720910793 | 1.00 | 3 | Ncl       |
| 0.00836451149983724 | -0.47631845745 | 1.00 | 3 | Nrbp2     |
| 0.00837064634016622 | -0.84504721386 | 1.00 | 3 | Phf10     |
| 0.00838320169491874 | -0.73567248343 | 1.00 | 3 | Bace1     |
| 0.00843555698045484 | -0.96          | 1.00 | 3 | Dock10    |
| 0.00849155036021851 | 0.292555977454 | 1.00 | 3 | Eln       |
| 0.0084919710641678  | -0.32941326613 | 1.00 | 3 | Ociad1    |
| 0.00853522540390955 | -0.26594851107 | 1.00 | 3 | Optn      |
| 0.00854924087040052 | -0.28801920184 | 1.00 | 3 | Aamdc     |
| 0.00863978366788804 | -0.38939993688 | 1.00 | 3 | Gnl3      |
| 0.0086798379085127  | -0.36136605743 | 1.00 | 3 | Abl1      |
| 0.00870477473227593 | -0.61086171142 | 1.00 | 3 | Inhba     |
| 0.00874863361650804 | -0.88948336356 | 1.00 | 3 | Ercc6l2   |
| 0.00884612624425909 | -0.27          | 1.00 | 3 | Pgm2      |
| 0.00889641139035595 | -0.45327020859 | 1.00 | 3 | Ube2a     |
| 0.00889912666528128 | 0.829848261103 | 1.00 | 3 | Phactr2   |
| 0.00902015250739256 | 0.70           | 1.00 | 3 | Atl2      |
| 0.0090470506926111  | -0.46047710778 | 1.00 | 3 | Cic       |
| 0.00904957801360491 | -0.70369333801 | 1.00 | 3 | Fbxo18    |
| 0.00906628898469686 | -0.86451064532 | 1.00 | 3 | Gpr64     |
| 0.00907660251376535 | 0.445316958531 | 1.00 | 3 | Sh3glb1   |
| 0.00909463360468502 | -0.35140733958 | 1.00 | 3 | Rere      |
| 0.00909689329210117 | 0.61           | 1.00 | 3 | Txnip     |
| 0.00919413831404261 | 0.624500989610 | 1.00 | 3 | Fzd4      |
| 0.00924236074553584 | 0.56           | 1.00 | 3 | Rab11fip2 |
| 0.00924411919731549 | -1.23          | 1.00 | 3 | Lmbr1     |
| 0.00925619873805289 | 0.642155206664 | 1.00 | 3 | Emp2      |
| 0.00926621058709022 | 0.692659600759 | 1.00 | 3 | Phc2      |

|                            |                |      |          |          |
|----------------------------|----------------|------|----------|----------|
| <b>0.00926837779307036</b> | -0.55735400946 | 1.00 | <b>3</b> | Hnmpu1   |
| <b>0.00931652256531837</b> | -0.32474903267 | 1.00 | <b>3</b> | Rnaseh2c |
| <b>0.00933477242288187</b> | -0.92930522683 | 1.00 | <b>3</b> | Gpc1     |
| <b>0.00936167802178327</b> | -0.81046766753 | 1.00 | <b>3</b> | Extl3    |
| <b>0.00937509199442569</b> | -0.72295353819 | 1.00 | <b>3</b> | Fam129a  |
| <b>0.0094447374895224</b>  | -0.88479399178 | 1.00 | <b>3</b> | Cd2bp2   |
| <b>0.00950426275435446</b> | -0.30503496901 | 1.00 | <b>3</b> | Ppp1r14a |
| <b>0.00957614234151687</b> | -0.25742537556 | 1.00 | <b>3</b> | Cbx5     |
| <b>0.00958184356703945</b> | 0.316680451733 | 1.00 | <b>3</b> | Npat     |
| <b>0.00958611549687317</b> | -0.38          | 1.00 | <b>3</b> | Tubb2a   |
| <b>0.00960387349975286</b> | -0.40714498684 | 1.00 | <b>3</b> | Zfp827   |
| <b>0.0097004224923722</b>  | -0.57899551082 | 1.00 | <b>3</b> | Zkscan17 |
| <b>0.00971340048198849</b> | -0.55692657639 | 1.00 | <b>3</b> | Hyl      |
| <b>0.009734019262288</b>   | -0.27616287891 | 1.00 | <b>3</b> | Gorasp2  |
| <b>0.00975135480739576</b> | -0.49896442301 | 1.00 | <b>3</b> | Pinx1    |
| <b>0.00980133269265549</b> | -0.31921482918 | 1.00 | <b>3</b> | Ap4s1    |
| <b>0.00983638205116853</b> | -0.28738885498 | 1.00 | <b>3</b> | Snx1     |
| <b>0.00992776956646623</b> | -0.28142171412 | 1.00 | <b>3</b> | Smarcd3  |

| p_val                | avg_logFC          | p_val_adj            | cluster | gene     |
|----------------------|--------------------|----------------------|---------|----------|
| 1.27419059030556e-36 | 1.62               | 1.75978462427102e-32 | 4       | Tpm2     |
| 1.75005994649201e-35 | 1.51               | 2.41700779210011e-31 | 4       | Tagln    |
| 1.20822469967782e-33 | 1.67               | 1.66867913272504e-29 | 4       | Cnn1     |
| 3.06275547432466e-33 | 1.15               | 4.22997158558979e-29 | 4       | Myh11    |
| 2.97607141833422e-32 | 1.39               | 4.11025223586139e-28 | 4       | Myl9     |
| 3.11915574417685e-32 | 1.49               | 4.30786599828265e-28 | 4       | Itga8    |
| 3.90165398122307e-31 | 1.32               | 5.38857431346718e-27 | 4       | Mylk     |
| 9.64940447481215e-31 | 1.26               | 1.33267925201631e-26 | 4       | Acta2    |
| 1.853973053977E-30   | 1.47               | 2.56052218484764e-26 | 4       | Cbr2     |
| 1.47521616365946e-29 | 1.95               | 2.03742104363008e-25 | 4       | Tes      |
| 5.88764491743851e-28 | 1.83               | 8.13142639547432e-24 | 4       | Myom1    |
| 1.63904752213999e-27 | 1.56               | 2.26368853282754e-23 | 4       | Sh3bgr   |
| 1.67862236971609e-27 | 0.97               | 2.3183453548149e-23  | 4       | Flna     |
| 4.76608130324368e-27 | -0.70              | 6.58243488790984e-23 | 4       | Itm2b    |
| 4.77135313044731e-27 | 1.56               | 6.58971580846078e-23 | 4       | Npnt     |
| 1.50869456088167e-26 | -0.920852451580314 | 2.08365805803368e-22 | 4       | Ifitm3   |
| 1.62235585211598e-26 | 1.25               | 2.24063566735737e-22 | 4       | Susd5    |
| 1.66342116989613e-26 | -0.73              | 2.29735097774354e-22 | 4       | Ftl1     |
| 1.84074397300665e-26 | -1.74              | 2.54225150111948e-22 | 4       | Igfbp4   |
| 1.08774444625323e-25 | 1.49               | 1.50228385472033e-21 | 4       | Lmod1    |
| 1.18373875799138e-25 | 1.97               | 1.63486159866189e-21 | 4       | Ptprz1   |
| 2.63145035609033e-25 | -2.08              | 3.63429608679635e-21 | 4       | Serpinf1 |
| 3.21064926500784e-25 | 1.32               | 4.43422769990232e-21 | 4       | Nov      |
| 1.13291679634242e-24 | 1.49               | 1.56467138742851e-20 | 4       | Synpo2   |
| 1.21429726820114e-24 | 1.66               | 1.67706595711259e-20 | 4       | Sost     |
| 1.32106389609167e-24 | -1.99              | 1.82452134689221e-20 | 4       | Pcolce   |
| 2.59252527687966e-24 | 1.38               | 3.5805366598985e-20  | 4       | Rasl12   |
| 2.73502341323598e-24 | 1.19               | 3.77734083602022e-20 | 4       | Ncam1    |
| 1.34130287108954e-23 | -0.800095049584556 | 1.85247339526176e-19 | 4       | Cfh      |
| 1.37662104684587e-23 | 1.55               | 1.90125132779884e-19 | 4       | Thsd4    |
| 1.39429592526364e-23 | -2.08              | 1.92566210238161e-19 | 4       | Dpt      |
| 1.5215580540014e-23  | 1.21               | 2.10142382838134e-19 | 4       | Col18a1  |
| 2.82254265821407e-23 | 1.24               | 3.89821366525946e-19 | 4       | Smtn     |
| 5.52167929428906e-23 | 1.76               | 7.62599127334262e-19 | 4       | Speg     |
| 7.49106868161634e-23 | -1.37              | 1.03459149561803e-18 | 4       | Serping1 |
| 8.302838634511E-23   | -1.56              | 1.14670504381231e-18 | 4       | Mmp2     |
| 2.10165616656446e-22 | -1.53              | 2.90259733164218e-18 | 4       | Rnase4   |
| 2.53725132090401e-22 | 1.25               | 3.50419779930052e-18 | 4       | Cspg4    |
| 2.74846604270162e-22 | 1.17               | 3.79590645157521e-18 | 4       | Pbxip1   |
| 3.43594071764035e-22 | 1.62               | 4.74537772513309e-18 | 4       | Dsp      |
| 3.45027387492958e-22 | 1.62               | 4.76517324866524e-18 | 4       | Ramp1    |
| 1.27317726003399e-21 | -1.24              | 1.75838511383294e-17 | 4       | Dcn      |
| 1.58006310415949e-21 | 1.13               | 2.18222515315467e-17 | 4       | Tpm1     |
| 2.21537423594788e-21 | 0.920438388318979  | 3.05965335726762e-17 | 4       | Ccdc3    |
| 4.39773505490874e-21 | 1.03               | 6.07371188433446e-17 | 4       | Cald1    |
| 4.968525128228E-21   | -1.80              | 6.8620300545957e-17  | 4       | Fbln1    |
| 6.28793385845536e-21 | 1.25               | 8.6842654519127e-17  | 4       | Mylk4    |
| 7.05428667368283e-21 | -1.83              | 9.74267532502336e-17 | 4       | Col14a1  |
| 7.28812878277664e-21 | -2.04              | 1.00656346618928e-16 | 4       | Cygb     |
| 7.44566530602823e-21 | 1.37               | 1.02832083541556e-16 | 4       | Hspb6    |
| 9.15260886958521e-21 | 1.09               | 1.26406681097841e-16 | 4       | Kcnmb1   |
| 9.62432243380366e-21 | 1.32               | 1.32921517133262e-16 | 4       | Fblim1   |
| 2.3146584060559e-20  | 1.38               | 3.19677472460381e-16 | 4       | Pkp4     |
| 3.4651799833423e-20  | 0.888751178936024  | 4.78576007499406e-16 | 4       | Map1b    |
| 3.56037964059894e-20 | -0.850335230079342 | 4.91724032163119e-16 | 4       | Sepp1    |



|                      |                    |                      |   |             |
|----------------------|--------------------|----------------------|---|-------------|
| 4.02850479558436e-20 | 1.10               | 5.56376797318156e-16 | 4 | Itga9       |
| 4.707195694871E-20   | 0.885380146347071  | 6.50110797418633e-16 | 4 | Dmd         |
| 6.22467518084016e-20 | -0.736567127615464 | 8.59689889225835e-16 | 4 | Sptbn1      |
| 1.11510327472503e-19 | 0.903509159686011  | 1.54006913272274e-15 | 4 | Tns1        |
| 1.31993726589319e-19 | 1.24               | 1.82296535792508e-15 | 4 | Mcam        |
| 1.58655654694892e-19 | 0.967215141828337  | 2.19119324699115e-15 | 4 | Ppp1r12a    |
| 3.47808847504228e-19 | 0.962276260477803  | 4.80358799288089e-15 | 4 | Wwp2        |
| 4.24292980892366e-19 | -1.45              | 5.85991035910446e-15 | 4 | C1ra        |
| 6.07007608119825e-19 | 1.31               | 8.38338207574291e-15 | 4 | Actg2       |
| 1.56498731675983e-18 | -1.06              | 0.00                 | 4 | Gsn         |
| 2.29537260032688e-18 | 1.30               | 3.17013909831146e-14 | 4 | Entpd1      |
| 2.48567216042939e-18 | 1.22               | 3.43296182076903e-14 | 4 | E030013I19R |
| 4.17077464521174e-18 | 0.90               | 5.76025686250193e-14 | 4 | Serpine2    |
| 4.19034224824027e-18 | -1.42              | 5.78728167904464e-14 | 4 | C3          |
| 5.86143073940823e-18 | 1.34               | 8.09522199419671e-14 | 4 | Pcp4l1      |
| 6.33319631796474e-18 | 0.925240884095843  | 8.7467774347411e-14  | 4 | Dstn        |
| 6.99944582937295e-18 | 1.25               | 9.66693463494698e-14 | 4 | Sgcg        |
| 8.78170246832207e-18 | 0.790434464870033  | 1.21284092789996e-13 | 4 | Pgm5        |
| 9.84437948201148e-18 | 1.01               | 1.35960725026061e-13 | 4 | Aoc3        |
| 1.0550202416832e-17  | -1.88              | 1.45708845578867e-13 | 4 | Gpx3        |
| 1.19684510406809e-17 | -0.940532916913993 | 1.65296277322843e-13 | 4 | Ctsl        |
| 1.5474294216763e-17  | -1.12              | 2.13715477427714e-13 | 4 | Ly6e        |
| 2.70199480170873e-17 | -0.980217896519157 | 3.73172502063993e-13 | 4 | Cd34        |
| 2.77930996491657e-17 | -0.68              | 3.83850499254627e-13 | 4 | Ppib        |
| 2.83785163728874e-17 | 1.11               | 3.91935689625949e-13 | 4 | Csrp1       |
| 4.07220465640938e-17 | 0.862981155511904  | 5.62412185096699e-13 | 4 | Lpp         |
| 4.47827758509807e-17 | 1.09               | 6.18494917277895e-13 | 4 | Slmap       |
| 4.75265196811946e-17 | -0.947611256343615 | 6.56388763316978e-13 | 4 | Lrp1        |
| 4.77361272027984e-17 | -1.16              | 6.59283652797849e-13 | 4 | Lum         |
| 5.53532909324215e-17 | 1.15               | 7.64484301067673e-13 | 4 | Dmpk        |
| 1.53871930080454e-16 | 1.68               | 2.12512522634115e-12 | 4 | Itgb3       |
| 1.65435392117813e-16 | -0.843937849053841 | 2.28482820053912e-12 | 4 | Ccdc80      |
| 2.18635208877245e-16 | 1.18               | 3.01957086980364e-12 | 4 | Osbpl3      |
| 2.45681045719207e-16 | 1.27               | 3.39310092242796e-12 | 4 | Itih4       |
| 2.97052666093175e-16 | -1.67              | 4.10259437141284e-12 | 4 | Pdgfra      |
| 3.25778922211286e-16 | 1.84               | 4.49933269466007e-12 | 4 | Net1        |
| 3.71678859351504e-16 | 1.07               | 5.13325672650363e-12 | 4 | Mustn1      |
| 4.04201950889471e-16 | 1.09               | 5.58243314373448e-12 | 4 | Pdlim3      |
| 5.15902862995779e-16 | 1.74               | 7.1251344408347e-12  | 4 | Trabd2b     |
| 6.12597790475225e-16 | -1.99              | 8.46058808425333e-12 | 4 | Abca8a      |
| 6.37012101036218e-16 | -0.371469078658309 | 8.79777412741121e-12 | 4 | B2m         |
| 7.6973810561037e-16  | 1.26               | 1.06308529765848e-11 | 4 | Rcan2       |
| 9.57939422794401e-16 | -1.01              | 1.32301013682135e-11 | 4 | Npc2        |
| 9.60707137634962e-16 | -0.483708640435184 | 1.32683262778765e-11 | 4 | H2-D1       |
| 1.05329501389179e-15 | -0.89              | 1.45470574368596e-11 | 4 | Lamp2       |
| 1.1531640108194e-15  | -1.90              | 1.59263481534267e-11 | 4 | Entpd2      |
| 1.22189667212339e-15 | -0.473317068049283 | 1.68756149386961e-11 | 4 | Cst3        |
| 1.51498998128521e-15 | 1.35               | 2.09235266315301e-11 | 4 | Mrv1        |
| 1.54119692311196e-15 | 0.889932234742431  | 2.12854707050992e-11 | 4 | Actn1       |
| 1.86592025003727e-15 | -1.47              | 2.57702245732647e-11 | 4 | Slc43a3     |
| 2.32921729523204e-15 | 1.09               | 3.21688200644497e-11 | 4 | Xirp1       |
| 3.0145445980109e-15  | 0.964551972296041  | 4.16338754431285e-11 | 4 | Rassf3      |
| 4.1987965143005e-15  | 1.08               | 5.79895786590042e-11 | 4 | Enah        |
| 6.19161644154933e-15 | -0.667124207759602 | 8.55124146742378e-11 | 4 | Anxa5       |
| 8.64239383468443e-15 | 0.694656279120412  | 1.19360101250827e-10 | 4 | Tspan2      |
| 1.42124037816792e-14 | 1.24               | 1.96287508628771e-10 | 4 | Jph2        |

|                      |                    |                      |   |             |
|----------------------|--------------------|----------------------|---|-------------|
| 1.56320624295703e-14 | -2.07              | 2.15894414214795e-10 | 4 | Smoc2       |
| 1.57338883699791e-14 | -0.941041393288764 | 2.17300732277782e-10 | 4 | S100a10     |
| 2.27725151390697e-14 | 0.918324637888187  | 3.14511206585691e-10 | 4 | Actn4       |
| 2.68106020511929e-14 | -0.48              | 3.70281224929025e-10 | 4 | Rps5        |
| 2.69532108921333e-14 | -1.97              | 3.72250795631254e-10 | 4 | Il33        |
| 2.75738320685823e-14 | 0.721126537524936  | 3.80822194699191e-10 | 4 | Cpe         |
| 2.86079882042916e-14 | 1.54               | 3.95104925089471e-10 | 4 | 5930403L14F |
| 4.27808133898564e-14 | -0.891994869506175 | 5.90845813727306e-10 | 4 | Ly6a        |
| 4.950488780077E-14   | 0.851198419068353  | 6.83712005416434e-10 | 4 | Pcdh7       |
| 5.07791823262446e-14 | 1.15               | 7.01311287107764e-10 | 4 | Ppp1r14a    |
| 5.77606602236509e-14 | -0.413001552782163 | 7.97732478348843e-10 | 4 | Ltbp4       |
| 8.25536179493028e-14 | 1.01               | 1.14014801749782e-09 | 4 | Lims2       |
| 9.45034453595555e-14 | -1.63              | 1.30518708386082e-09 | 4 | Cxcl1       |
| 9.94412809879989e-14 | 1.64               | 1.37338353172525e-09 | 4 | Grip2       |
| 1.2559954861457e-13  | -1.64              | 1.73465536591582e-09 | 4 | Add3        |
| 1.31375284056273e-13 | -0.252467378404349 | 1.81442404810119e-09 | 4 | Timp2       |
| 1.8808703714347e-13  | 0.797830704848691  | 2.59767006998846e-09 | 4 | Gucy1b3     |
| 1.88643607419436e-13 | -0.822626295499777 | 2.60535686206983e-09 | 4 | Mfap5       |
| 2.42846233755576e-13 | -0.916103587717425 | 3.35394933439825e-09 | 4 | Ppap2b      |
| 2.76124124025934e-13 | 0.956233417771009  | 3.81355027692218e-09 | 4 | Cdh13       |
| 2.77583603072237e-13 | -1.45              | 3.83370714203067e-09 | 4 | C1s1        |
| 2.80515661461895e-13 | -1.44              | 3.87420180045022e-09 | 4 | Igf1        |
| 2.82620144353169e-13 | -0.510202220219208 | 3.90326681366162e-09 | 4 | Nfkbia      |
| 3.55753262462831e-13 | 2.21               | 4.91330830787416e-09 | 4 | Rgs7bp      |
| 6.0693048237334e-13  | 0.850133991825046  | 8.3823168920582e-09  | 4 | Pls3        |
| 6.42798307100382e-13 | -1.75              | 8.87768741936337e-09 | 4 | Cpxm1       |
| 6.57922260595271e-13 | -0.453165064882906 | 9.08656434108128e-09 | 4 | Emp1        |
| 7.46306366819017e-13 | -1.27              | 1.03072372321374e-08 | 4 | Cxcl12      |
| 7.66912942626273e-13 | -1.88              | 1.05918346506115e-08 | 4 | Cfb         |
| 7.99011141910063e-13 | -1.33              | 1.10351428809199e-08 | 4 | Mmp3        |
| 8.6158373010207e-13  | -1.50              | 1.18993328964397e-08 | 4 | Marcks      |
| 1.10179938654102e-12 | -1.55              | 1.52169513275181e-08 | 4 | Bicc1       |
| 1.18226581086681e-12 | -0.916458456135863 | 1.63282731138815e-08 | 4 | Tcf4        |
| 1.18554220675488e-12 | 0.91               | 1.63735234174916e-08 | 4 | Nes         |
| 1.28353427803061e-12 | -1.62              | 1.77268919138807e-08 | 4 | Pi16        |
| 1.42781034888913e-12 | 1.09               | 1.97194887285078e-08 | 4 | Cdo1        |
| 1.47543815366604e-12 | 0.817652527108113  | 2.03772763402817e-08 | 4 | Lrrfip1     |
| 1.55972879006229e-12 | -0.503513886907136 | 2.15414143195503e-08 | 4 | Rplp0       |
| 1.84696356697353e-12 | -0.468324837581166 | 2.55084138234714e-08 | 4 | Rps18       |
| 1.90496882615424e-12 | -0.337765650660974 | 2.63095244580162e-08 | 4 | Selm        |
| 1.90733795847905e-12 | -1.73              | 2.63422445445541e-08 | 4 | Olfml3      |
| 1.9201458653778e-12  | 1.07               | 2.65191345467328e-08 | 4 | Limch1      |
| 1.99783618259939e-12 | 1.00               | 2.75921155178801e-08 | 4 | Plin4       |
| 2.12663210654161e-12 | -1.96              | 2.93709160234461e-08 | 4 | Dpep1       |
| 2.28810619381067e-12 | 1.59               | 3.16010346427192e-08 | 4 | Ivd         |
| 2.54961490111286e-12 | 0.982291417206202  | 3.52127313992698e-08 | 4 | Adcy5       |
| 3.04330706586837e-12 | 0.853831622506735  | 4.20311138867081e-08 | 4 | Sun2        |
| 3.57149642073675e-12 | 2.32               | 4.93259370667953e-08 | 4 | Fbxo32      |
| 3.99741257075239e-12 | -0.342940339988498 | 5.52082650146613e-08 | 4 | Ifitm2      |
| 4.54588019348661e-12 | 0.977538463729247  | 6.27831513522435e-08 | 4 | Mfge8       |
| 4.70675730991947e-12 | 0.753930244485465  | 6.50050252072978e-08 | 4 | Vcl         |
| 5.05263825135872e-12 | 1.40               | 6.97819868895154e-08 | 4 | 2900026A02F |
| 5.55567310253219e-12 | -0.446563522889901 | 7.67294012190721e-08 | 4 | Rps3        |
| 6.24401227829593e-12 | 0.549911202613995  | 8.62360535755451e-08 | 4 | Utn         |
| 6.98063464532724e-12 | 0.670383729973608  | 9.64095450866145e-08 | 4 | Mef2c       |
| 8.39869018170945e-12 | 1.27               | 1.15994310099589e-07 | 4 | Gm13889     |

|                      |                    |                      |   |             |
|----------------------|--------------------|----------------------|---|-------------|
| 8.94288846415527e-12 | -1.64              | 1.23510232578448e-07 | 4 | C7          |
| 9.37126328952527e-12 | 1.42               | 1.29426517291634e-07 | 4 | Mtus2       |
| 1.04160857739895e-11 | -0.608532055840049 | 1.43856560624569e-07 | 4 | Col3a1      |
| 1.13768229224246e-11 | -1.78              | 1.57125301381606e-07 | 4 | Gfpt2       |
| 1.25214455855403e-11 | 0.508701630558147  | 1.72933684981898e-07 | 4 | Kcnma1      |
| 1.35155698485325e-11 | -1.76              | 1.86663535178083e-07 | 4 | Scn7a       |
| 1.48882269628808e-11 | 1.37               | 2.05621302584347e-07 | 4 | Mmp17       |
| 1.54831316490779e-11 | 0.946616797783108  | 2.13837531205414e-07 | 4 | Myh10       |
| 1.58643120170443e-11 | -0.260119074412124 | 2.19102013267399e-07 | 4 | Rps4x       |
| 1.73157686322673e-11 | -0.549069121190739 | 2.39148080580243e-07 | 4 | Bsg         |
| 1.81193864623805e-11 | 1.25               | 2.50246846431938e-07 | 4 | Rgs4        |
| 1.86216975402305e-11 | 1.32               | 2.57184264728124e-07 | 4 | Pawr        |
| 2.4544560295277e-11  | 0.837293943206202  | 3.38984922238071e-07 | 4 | Plcb4       |
| 2.6697339323121e-11  | -1.49              | 3.68716953391625e-07 | 4 | C4b         |
| 3.03311705830569e-11 | 0.893361231354697  | 4.18903796922598e-07 | 4 | Nexn        |
| 3.3165880107084e-11  | -0.40              | 4.58053970158937e-07 | 4 | Cd81        |
| 4.0126131118131e-11  | -0.586313414120636 | 5.54181996872507e-07 | 4 | Zfp36       |
| 4.72234682667025e-11 | 0.87               | 6.52203320231428e-07 | 4 | Rrad        |
| 4.73354222653403e-11 | -1.19              | 6.53749516906615e-07 | 4 | Fbln2       |
| 5.0986369729736e-11  | 1.59               | 7.04172752337384e-07 | 4 | Fam13c      |
| 5.13455226115673e-11 | -1.79              | 7.09133012788356e-07 | 4 | Tgfb1       |
| 5.19421268652542e-11 | -1.21              | 7.17372714136025e-07 | 4 | Mgst1       |
| 5.25961717201888e-11 | 0.844173207807563  | 7.26405727627528e-07 | 4 | Nox4        |
| 6.34198293883195e-11 | 0.865323951979183  | 8.75891263682081e-07 | 4 | Pdlim7      |
| 6.39283164555942e-11 | -1.07              | 8.82913978568211e-07 | 4 | Nucb2       |
| 6.99675839565644e-11 | 0.699536978658716  | 9.6632230202411e-07  | 4 | Tbc1d1      |
| 8.40386446700944e-11 | 1.56               | 1.16065772153867e-06 | 4 | Kcnab1      |
| 1.13480138836213e-10 | -0.799961378362012 | 1.56727419746694e-06 | 4 | Cd302       |
| 1.14419470193976e-10 | -1.52              | 1.58024730284901e-06 | 4 | Ifi2712a    |
| 1.20623920183881e-10 | 1.05               | 1.66593696165958e-06 | 4 | Sorl1       |
| 1.21675430005933e-10 | 0.637605809291217  | 1.68045936381194e-06 | 4 | Samd4       |
| 1.25625259697332e-10 | -0.923431320800654 | 1.73501046167985e-06 | 4 | Tgfb2       |
| 1.40098764096155e-10 | 0.741684453817826  | 0.00                 | 4 | Hspb2       |
| 1.41246166707932e-10 | -0.912901933875391 | 1.95075080840325e-06 | 4 | Mtch1       |
| 1.56491774756664e-10 | -0.839283918611282 | 2.16130790116429e-06 | 4 | Ctsz        |
| 1.64773106420832e-10 | -0.454939076181638 | 2.2756813727781e-06  | 4 | Rpl14-ps1   |
| 1.75516788644481e-10 | 0.909712669957527  | 2.42406236796893e-06 | 4 | Acs1        |
| 1.85061215651828e-10 | 0.690212839922092  | 2.55588044936739e-06 | 4 | Perp        |
| 1.92933034378678e-10 | -0.311927604862711 | 2.66459813780393e-06 | 4 | Cd63        |
| 2.02753882014683e-10 | 1.08               | 2.80023386450478e-06 | 4 | Prdm16      |
| 2.12708385899384e-10 | -0.330552970919783 | 2.93771551765639e-06 | 4 | Rps14       |
| 2.18068076900988e-10 | -1.79              | 3.01173821007955e-06 | 4 | Clec3b      |
| 2.2373490153823e-10  | -1.57              | 3.0900027251445e-06  | 4 | Lpar1       |
| 2.41483863644938e-10 | -0.922300037037999 | 3.33513364080023e-06 | 4 | Ccn1        |
| 2.52334703377061e-10 | 0.820559913361105  | 3.48499458834059e-06 | 4 | Rock1       |
| 3.19904775935945e-10 | -0.50              | 4.41820486045133e-06 | 4 | Gabarap     |
| 3.37514172037592e-10 | 1.70               | 4.66140823001118e-06 | 4 | Gpsm2       |
| 3.44468910342867e-10 | -0.418666820434651 | 4.75746012074534e-06 | 4 | Fosb        |
| 3.46968225650775e-10 | -0.778398964089853 | 4.79197816446285e-06 | 4 | Il6st       |
| 3.51424564794484e-10 | 1.27               | 4.85352466437661e-06 | 4 | 1190005I06R |
| 3.53641781471066e-10 | 0.631849345294794  | 4.88414664389689e-06 | 4 | Syne1       |
| 3.56607981333563e-10 | -1.40              | 4.92511283019784e-06 | 4 | Gda         |
| 3.79229114403356e-10 | -0.692624195348506 | 5.23753329902474e-06 | 4 | Rplp2       |
| 3.83549170564463e-10 | 0.741754879625322  | 5.2971975946658e-06  | 4 | Map1a       |
| 4.00855286500498e-10 | -1.98              | 5.53621236185838e-06 | 4 | Thy1        |
| 4.06068625153343e-10 | -0.447033073507551 | 5.60821378199282e-06 | 4 | Col1a2      |

|                      |                    |                      |   |         |
|----------------------|--------------------|----------------------|---|---------|
| 4.23289165952581e-10 | -1.12              | 5.84604667097109e-06 | 4 | Fuca1   |
| 4.56260743486686e-10 | -0.845978975780085 | 6.30141712829462e-06 | 4 | Pdia6   |
| 4.62656420921527e-10 | 1.03               | 6.38974782934721e-06 | 4 | Fmo3    |
| 4.73542512274687e-10 | 0.603266475178073  | 6.5400956370257e-06  | 4 | Pde4dip |
| 5.10164617733296e-10 | -1.75              | 7.04588353551455e-06 | 4 | Aldh1a1 |
| 5.3745445648126e-10  | -1.97              | 7.42278349846268e-06 | 4 | Scara5  |
| 5.61280004106288e-10 | 0.797129068607452  | 7.75183813671194e-06 | 4 | Uchl1   |
| 5.73045127278225e-10 | -0.551650448137212 | 7.91432625283956e-06 | 4 | Anxa2   |
| 5.78038356975828e-10 | -0.362152382724374 | 7.98328774819316e-06 | 4 | Hspa5   |
| 5.97879392686548e-10 | -0.808344200441042 | 8.25731229239392e-06 | 4 | Nrp1    |
| 6.18721852511008e-10 | 1.74               | 8.54516750502954e-06 | 4 | Filip1  |
| 7.30659412394653e-10 | 0.936971453678694  | 1.00911371445825e-05 | 4 | Smarcd3 |
| 8.54389599292059e-10 | -1.16              | 1.17999747558226e-05 | 4 | Prg4    |
| 8.5852377273847e-10  | -0.887593059006502 | 1.1857071825291e-05  | 4 | Cd47    |
| 8.9011200054336e-10  | 0.554585671347093  | 1.22933368395043e-05 | 4 | Actb    |
| 1.0054956674641e-09  | -0.813867054487435 | 1.38869006633467e-05 | 4 | Cp      |
| 1.03873883643983e-09 | 1.35               | 1.43460220700706e-05 | 4 | Efh1    |
| 1.05478276829813e-09 | -0.572876683799429 | 1.45676048129654e-05 | 4 | Mt1     |
| 1.178371165925E-09   | -0.504661630116368 | 1.62744841725902e-05 | 4 | Tmem59  |
| 1.26873540908375e-09 | -0.667182634620867 | 1.75225047348557e-05 | 4 | Cyb5    |
| 1.36151794376311e-09 | 0.553930112085403  | 1.88039243213123e-05 | 4 | Fn1     |
| 1.47247622938458e-09 | 1.21               | 2.03363692040304e-05 | 4 | Bcam    |
| 1.48866966310505e-09 | -0.272268267060929 | 2.05600167171438e-05 | 4 | Rps11   |
| 1.54557238754227e-09 | 0.622882019664133  | 2.13459002443462e-05 | 4 | Tmsb4x  |
| 1.71908884991167e-09 | 0.572933659752502  | 2.37423361061301e-05 | 4 | Csrp2   |
| 1.74198152348457e-09 | 0.834241345566168  | 2.40585068208454e-05 | 4 | Pdlim1  |
| 1.78514268786157e-09 | -0.436437923734414 | 2.46546056620561e-05 | 4 | Nfib    |
| 1.84494763140447e-09 | -1.78              | 2.54805717373271e-05 | 4 | Fxyd6   |
| 1.97522180893511e-09 | 0.875535562172662  | 2.72797884032027e-05 | 4 | Ldb3    |
| 2.05267501139311e-09 | 1.27               | 2.83494945823502e-05 | 4 | Kcnc4   |
| 2.29740375840769e-09 | -1.85              | 3.17294433073686e-05 | 4 | Fmod    |
| 2.71683193840987e-09 | -0.844161832728856 | 3.75221659013788e-05 | 4 | Htra3   |
| 2.74008744073269e-09 | -0.547359407592075 | 3.78433476439592e-05 | 4 | Mt2     |
| 2.81559063552954e-09 | 1.03               | 3.88861222672984e-05 | 4 | Fgf1    |
| 2.84131474027559e-09 | 0.792964225280639  | 3.92413978779461e-05 | 4 | Lmcd1   |
| 2.85077444804711e-09 | 0.721153939942337  | 3.93720459019787e-05 | 4 | Hdac11  |
| 2.8872053392294e-09  | -0.738316616099037 | 3.98751929400972e-05 | 4 | Nid1    |
| 2.8886310823708e-09  | -1.12              | 3.98948838786231e-05 | 4 | Abi3bp  |
| 3.58847134874374e-09 | -1.02              | 4.95603777974997e-05 | 4 | Hexa    |
| 3.66229055997961e-09 | -0.487126013434756 | 5.05798949238784e-05 | 4 | Icam1   |
| 3.84210920450167e-09 | 0.744680830675128  | 5.30633702233726e-05 | 4 | Phtf2   |
| 3.94447071861137e-09 | 1.14               | 5.44770850947416e-05 | 4 | Ryr2    |
| 3.94588552101668e-09 | 0.451774067621021  | 5.44966249307614e-05 | 4 | Endod1  |
| 4.82632355350622e-09 | -0.287851525683094 | 6.66563545974745e-05 | 4 | Hsp90b1 |
| 5.14750948400965e-09 | 1.22               | 7.10922534836573e-05 | 4 | Rgs2    |
| 5.25859807025278e-09 | 1.15               | 7.26264979482612e-05 | 4 | Pdgfa   |
| 5.29835864502047e-09 | -0.325888661699531 | 7.31756312463777e-05 | 4 | Rpl32   |
| 5.35317317936696e-09 | 0.973127645342121  | 7.3932674780237e-05  | 4 | Cacna1d |
| 6.26082485618554e-09 | -1.21              | 8.64682520887785e-05 | 4 | Thbd    |
| 7.29720660423885e-09 | -0.579388523164224 | 0.000100781720411143 | 4 | Sh3glb1 |
| 8.07298210166524e-09 | -0.321528033938322 | 0.000111495955806099 | 4 | Fgfr1   |
| 9.53992773319851e-09 | 1.03               | 0.000131755941923205 | 4 | Msr1    |
| 9.90423222639712e-09 | 0.548355973415712  | 0.000136787351278771 | 4 | Eln     |
| 9.91428713298629e-09 | -0.491401183896229 | 0.000136926219593674 | 4 | Arf4    |
| 1.13628632589675e-08 | -0.727503776720763 | 0.0001569325044696   | 4 | Fcgrt   |
| 1.14734854492946e-08 | 0.466258892534348  | 0.000158460307540208 | 4 | Atp2b4  |



|                      |                    |                      |   |           |
|----------------------|--------------------|----------------------|---|-----------|
| 1.23490459054598e-08 | 0.594536203407714  | 0.000170552673000306 | 4 | Ltbp1     |
| 1.26905246811405e-08 | -1.63              | 0.000175268836371232 | 4 | Gpm6b     |
| 1.32937374410091e-08 | -0.411287829272727 | 0.000183599807797777 | 4 | Gm        |
| 1.34117879668444e-08 | 1.28               | 0.000185230203610088 | 4 | Inpp5a    |
| 1.40008302392907e-08 | -1.48              | 0.000193365466434844 | 4 | Osmr      |
| 1.41254457138727e-08 | 0.82               | 0.000195086530754296 | 4 | Postn     |
| 1.62689866392824e-08 | 1.05               | 0.000224690974475129 | 4 | Pde5a     |
| 1.63743993392714e-08 | -0.401496978002948 | 0.000226146829274678 | 4 | Lmo4      |
| 1.75600621940548e-08 | -0.650135070252538 | 0.000242522018962091 | 4 | Adamts2   |
| 1.84921593105891e-08 | 0.463956230191331  | 0.000255395212238546 | 4 | Prpsap1   |
| 1.86567173034598e-08 | 0.606619594532861  | 0.000257667922678084 | 4 | Cacna2d1  |
| 1.89277240224993e-08 | 0.785414315397524  | 0.000261410796474737 | 4 | Msr3      |
| 1.90011017364644e-08 | -0.796815402359636 | 0.00026242421608231  | 4 | Sri       |
| 1.95678124523048e-08 | 1.12               | 0.000270251057778782 | 4 | Stom      |
| 1.95792897828071e-08 | -0.643353932568778 | 0.000270409571190349 | 4 | Nfkbiz    |
| 2.08653581304105e-08 | 0.748166897530638  | 0.000288171461139099 | 4 | Rbpms     |
| 2.13863909939597e-08 | -0.488330288780187 | 0.000295367446017577 | 4 | Rps19     |
| 2.15915695098772e-08 | -0.433149303298974 | 0.000298201166500914 | 4 | Gm6251    |
| 2.26911394195381e-08 | -1.54              | 0.000313387326523241 | 4 | Clec11a   |
| 2.294732931783E-08   | 0.660765693605758  | 0.00031692556520855  | 4 | Ctgf      |
| 2.30413938077603e-08 | 1.11               | 0.000318224689878978 | 4 | Gid4      |
| 2.37121168513953e-08 | -1.69              | 0.000327488045834621 | 4 | Ctsk      |
| 2.44582257394239e-08 | 1.02               | 0.000337792555687183 | 4 | Zak       |
| 2.53373464045518e-08 | -0.304469805726306 | 0.000349934091193265 | 4 | Gm1821    |
| 2.70138591841574e-08 | 0.896202515339266  | 0.000373088409192398 | 4 | Mgll      |
| 2.72756086719681e-08 | -0.519697678061945 | 0.000376703431368551 | 4 | Col1a1    |
| 2.9958424317463e-08  | -1.75              | 0.000413755798248482 | 4 | Lpl       |
| 3.25994332570832e-08 | -1.54              | 0.000450230772713576 | 4 | Dab2      |
| 3.33928984255677e-08 | -0.54              | 0.000461189320155515 | 4 | Vkorc1    |
| 3.71160160469671e-08 | -1.91              | 0.000512609297624662 | 4 | Inmt      |
| 3.83793612786584e-08 | 0.641234439098672  | 0.000530057358619552 | 4 | Kank1     |
| 3.97145768712897e-08 | 0.739219529554839  | 0.000548498021169382 | 4 | Xpr1      |
| 4.01297395324422e-08 | -0.95              | 0.000554231832682559 | 4 | Crispld2  |
| 4.0759873695514e-08  | 0.771071110301862  | 0.000562934615608744 | 4 | Sh3bgrl   |
| 4.17136176062206e-08 | 1.00               | 0.000576106772759513 | 4 | Myocd     |
| 4.47124864537914e-08 | -0.282015872998337 | 0.000617524150413313 | 4 | Rps26     |
| 4.54877757136975e-08 | 1.43               | 0.000628231670381876 | 4 | Tnk2      |
| 4.65606978565279e-08 | -0.730560543983892 | 0.000643049798096507 | 4 | Adamts5   |
| 4.69562713264931e-08 | -1.15              | 0.000648513063290196 | 4 | Serpina3n |
| 4.73667448459882e-08 | 1.02               | 0.000654182113067942 | 4 | Filip1l   |
| 4.7825451802707e-08  | -1.14              | 0.000660517314847187 | 4 | Timp1     |
| 5.16554721166169e-08 | 1.34               | 0.000713413725402596 | 4 | Gcnt2     |
| 5.19009419667267e-08 | 0.621782694351974  | 0.000716803909502462 | 4 | Marveld1  |
| 5.54733530801084e-08 | -0.519088734343057 | 0.000766142479389378 | 4 | Rarres2   |
| 5.6838330824879e-08  | -0.414762309200361 | 0.000784994187022404 | 4 | Cpxm2     |
| 5.82263130769628e-08 | -1.35              | 0.000804163609905934 | 4 | Ly6c1     |
| 5.83257383490865e-08 | -1.57              | 0.000805536772339234 | 4 | Lgals3bp  |
| 6.62212856445953e-08 | 0.693439815473379  | 0.000914582176037505 | 4 | Arhgef17  |
| 6.80201542255475e-08 | -1.73              | 0.000939426350009037 | 4 | Bace2     |
| 7.01574595677645e-08 | -0.406008604234949 | 0.000968944674090396 | 4 | Calr      |
| 7.21176997428009e-08 | -0.790868002238373 | 0.000996017551147823 | 4 | Cyp1b1    |
| 7.31972961725884e-08 | 0.796838090240764  | 0.00101092785743962  | 4 | Phldb2    |
| 7.66187376785351e-08 | -0.849181480424402 | 0.00105818138607825  | 4 | Ergic3    |
| 8.9937376342239e-08  | -0.96              | 0.00124212510466266  | 4 | Igfbp5    |
| 9.00720193336711e-08 | 0.680002846960473  | 0.00124398465901733  | 4 | Gne       |
| 9.16085737397089e-08 | 0.931767665101584  | 0.00126520601191912  | 4 | Itih2     |



|                      |                    |                     |   |          |
|----------------------|--------------------|---------------------|---|----------|
| 9.76239633249302e-08 | 0.50               | 0.00134828455748061 | 4 | Slc22a1  |
| 9.78022849031741e-08 | 0.425865344316241  | 0.00135074735679774 | 4 | Fam71a   |
| 9.86965378849781e-08 | -1.05              | 0.00136309788472943 | 4 | Cebpd    |
| 1.0240087165713e-07  | 0.638318070179746  | 0.00141425843845662 | 4 | Synm     |
| 1.108892133773e-07   | 0.419395463471273  | 0.0015314868925954  | 4 | Cav1     |
| 1.12173673019392e-07 | -1.80              | 0.00154923059807082 | 4 | Tmem100  |
| 1.14180124191999e-07 | 1.14               | 0.0015769416952157  | 4 | Rbpms2   |
| 1.16616490727316e-07 | -0.258017273319734 | 0.00161059035343496 | 4 | Rpl4     |
| 1.22456135532814e-07 | -1.46              | 0.00169124168784369 | 4 | Pltp     |
| 1.24797290198973e-07 | 0.821437586395644  | 0.00172357537493801 | 4 | Oxct1    |
| 1.25069172195661e-07 | -1.16              | 0.00172733033719427 | 4 | Ackr3    |
| 1.30329249651125e-07 | 0.693006666812382  | 0.00179997726693169 | 4 | Pi15     |
| 1.30408680415137e-07 | -0.25              | 0.00180107428521346 | 4 | Sec62    |
| 1.34177588814005e-07 | 0.606353265787112  | 0.00185312667911023 | 4 | Pdlim4   |
| 1.35826321517986e-07 | -0.624097670765212 | 0.0018758973264849  | 4 | Shisa5   |
| 1.43291509371433e-07 | 0.716263710258066  | 0.00197899903592887 | 4 | Unc5c    |
| 1.44398983765902e-07 | -1.71              | 0.00199429436479087 | 4 | Pdpm     |
| 1.45091522872618e-07 | -1.63              | 0.00200385902239373 | 4 | Efemp1   |
| 1.66001276895513e-07 | -0.758801623098967 | 0.00229264363520393 | 4 | Lama2    |
| 1.91231218124851e-07 | 0.511171027027729  | 0.00264109435352231 | 4 | Hip1     |
| 1.92293505961405e-07 | -0.334803509538698 | 0.00265576561083296 | 4 | Rpl14    |
| 1.92359910524125e-07 | 0.981785428383382  | 0.00265668272424869 | 4 | Tnc      |
| 2.05738104893375e-07 | -0.264073736269595 | 0.0028414489666824  | 4 | Ddx5     |
| 2.10879755135735e-07 | 0.444729789088815  | 0.00291246029817964 | 4 | Dpysl3   |
| 2.13888134347867e-07 | -0.684266907516258 | 0.00295400902347839 | 4 | Col5a2   |
| 2.1647992923139e-07  | 1.16               | 0.00298980430261472 | 4 | Zbtb38   |
| 2.49020638211236e-07 | -1.81              | 0.00343922403433539 | 4 | Gdf10    |
| 2.54987222428747e-07 | -1.86              | 0.00352162852896343 | 4 | Igfbp6   |
| 2.56168927808482e-07 | -1.06              | 0.00353794906196295 | 4 | Man2a1   |
| 2.56224081136101e-07 | 1.08               | 0.00353871078457069 | 4 | Hyal1    |
| 2.56544538111827e-07 | 0.532556346790098  | 0.00354313661586244 | 4 | Ehbp11i  |
| 2.63902933683424e-07 | -1.49              | 0.00364476341710177 | 4 | Medag    |
| 2.70135678970562e-07 | 1.29               | 0.00373084386226243 | 4 | Fgfr2    |
| 2.8256018461667e-07  | -1.64              | 0.00390243870974082 | 4 | Dnm1     |
| 3.12717704414724e-07 | 0.309241053094489  | 0.00431894421567175 | 4 | Tbc1d10b |
| 3.15369241601938e-07 | -0.34              | 0.00435556459576436 | 4 | Rpl13a   |
| 3.26986529578215e-07 | -1.67              | 0.00451601096000472 | 4 | Ccl7     |
| 3.27663333748331e-07 | 0.636602369216597  | 0.0045253583023982  | 4 | Cyb5r3   |
| 3.31454345448113e-07 | -1.73              | 0.00457771596498388 | 4 | Ms4a4d   |
| 3.53685354010715e-07 | 1.33               | 0.00488474842424198 | 4 | Kcnh2    |
| 3.63720775905584e-07 | 0.616574065474982  | 0.00502334763603202 | 4 | Tgfb1i1  |
| 3.68635975435593e-07 | 0.417863621800497  | 0.00509123145674097 | 4 | St5      |
| 3.75713932815057e-07 | 0.537722489451737  | 0.00518898512610876 | 4 | Gucy1a3  |
| 3.81107036437868e-07 | -0.692526885618016 | 0.0052634692802434  | 4 | Ace      |
| 4.17919001221601e-07 | 0.463698218555983  | 0.00577187932587153 | 4 | Sorbs2   |
| 4.21681840077134e-07 | 0.313713243925477  | 0.0058238478933053  | 4 | Emb      |
| 4.44794797235637e-07 | -0.783823769900103 | 0.00614306094462138 | 4 | Bhlhe40  |
| 4.58263329433817e-07 | 0.629950458815392  | 0.00632907484281044 | 4 | Ptgis    |
| 4.7598809454856e-07  | -0.488454896664567 | 0.00657387157381016 | 4 | Plxdc2   |
| 4.83339377273725e-07 | -0.678837043472771 | 0.00667540013952742 | 4 | Itm2c    |
| 5.05224715525962e-07 | 0.833042200643354  | 0.00697765854612906 | 4 | Tacc2    |
| 5.14987308124727e-07 | -1.40              | 0.00711248971251061 | 4 | SrpX     |
| 5.29099241592399e-07 | 1.19               | 0.00730738962563262 | 4 | Spint2   |
| 5.49555867056813e-07 | -0.25              | 0.00758991607992164 | 4 | App      |
| 5.6294166183355e-07  | -1.31              | 0.00777478729158316 | 4 | Sfn5     |
| 5.75641987592313e-07 | 0.546967955072414  | 0.00795019149063743 | 4 | Nacc2    |

|                      |                    |                     |   |             |
|----------------------|--------------------|---------------------|---|-------------|
| 5.91890146623454e-07 | -0.798980681362855 | 0.00817459481501653 | 4 | Pcolce2     |
| 6.01038640388493e-07 | -0.588731645017277 | 0.00830094466240548 | 4 | Hsd17b11    |
| 6.25800296271982e-07 | 1.11               | 0.00864292789181235 | 4 | Dysf        |
| 6.27008244055372e-07 | -1.04              | 0.00865961085864874 | 4 | Pkd2        |
| 6.32450762882505e-07 | 0.449472208836997  | 0.00873477748617028 | 4 | Tinagl1     |
| 6.56580913923153e-07 | 1.08               | 0.00906803900219267 | 4 | Itga7       |
| 6.68003634251958e-07 | 0.367739751417865  | 0.0092257981926538  | 4 | Trak2       |
| 6.93202908694081e-07 | -1.36              | 0.00957382537197396 | 4 | Litaf       |
| 7.33956361271522e-07 | -0.585615459994119 | 0.010136671305521   | 4 | Ssr3        |
| 7.7482201410233e-07  | 0.819744391345938  | 0.0107010668367673  | 4 | Npy1r       |
| 7.95125127311387e-07 | 0.531477495183474  | 0.0109814731332976  | 4 | Fhl1        |
| 8.38601234968168e-07 | -0.776468793698684 | 0.0115819216561454  | 4 | Stat3       |
| 8.56505538703322e-07 | 0.590059122278281  | 0.0118291979950316  | 4 | Sema3f      |
| 9.18779215862359e-07 | -0.515279718663028 | 0.012689259750275   | 4 | Rpl7        |
| 9.98809264858153e-07 | -1.90              | 0.013794554756956   | 4 | Hsd11b1     |
| 1.00536281283359e-06 | -0.582986663113584 | 0.0138850658080447  | 4 | Myl12b      |
| 1.08363531750313e-06 | 0.468988721505641  | 0.0149660873700357  | 4 | Hdac5       |
| 1.11100274074109e-06 | -1.20              | 0.0153440588523752  | 4 | Matn2       |
| 1.1332979979847e-06  | -0.797716940503969 | 0.0156519786501666  | 4 | Epb4.1l2    |
| 1.15650723194227e-06 | 0.761778021335417  | 0.0159725213803547  | 4 | Stk38l      |
| 1.29632575824572e-06 | -0.306493121273288 | 0.0179035550471317  | 4 | Tuba1a      |
| 1.32106618693855e-06 | -0.282010334077726 | 0.0182452451078083  | 4 | Tapbp       |
| 1.33863676485589e-06 | -0.282544985094465 | 0.0184879123594247  | 4 | Mettl7a1    |
| 1.33962527401626e-06 | 1.00               | 0.0185015646594385  | 4 | Neo1        |
| 1.36595808023551e-06 | 0.688784538255243  | 0.0188652470461326  | 4 | Nudt4       |
| 1.3899589982085e-06  | -0.337715830971405 | 0.0191967237242575  | 4 | Cox4i1      |
| 1.39933555245627e-06 | -1.73              | 0.0193262233149735  | 4 | Il6         |
| 1.45136716678751e-06 | 1.25               | 0.0200448319405023  | 4 | 6330403A02F |
| 1.54784419968039e-06 | 1.14               | 0.0213772762417859  | 4 | Plcd1       |
| 1.5524730370057e-06  | -1.05              | 0.0214412051140857  | 4 | Pdlim2      |
| 1.59844047623909e-06 | 1.14               | 0.0220760614173381  | 4 | Prkg1       |
| 1.60911594294853e-06 | 1.06               | 0.0222235002880621  | 4 | 2200002D01F |
| 1.63677479566878e-06 | -0.343203568945458 | 0.0226054967029815  | 4 | H3f3b       |
| 1.64234377303624e-06 | 0.535113299723411  | 0.0226824098494036  | 4 | Slc25a23    |
| 1.64443221210731e-06 | 0.776089856457934  | 0.0227112532814141  | 4 | Serpini1    |
| 1.68953351644732e-06 | 0.905345767845123  | 0.023334147395654   | 4 | Cd97        |
| 1.76840470053903e-06 | 0.436761854681174  | 0.0244234373191446  | 4 | Clu         |
| 1.77209622031079e-06 | -1.55              | 0.0244744208987123  | 4 | Igsf10      |
| 1.80090502418022e-06 | -0.638669679387152 | 0.024872299288953   | 4 | Sdf4        |
| 1.81177689823372e-06 | 0.807745201814247  | 0.0250224507415059  | 4 | Rgs5        |
| 1.85056386194088e-06 | 0.439333061053479  | 0.0255581374972655  | 4 | Mob2        |
| 1.8768753653102e-06  | -0.872419954504541 | 0.0259215256702992  | 4 | Gas1        |
| 1.93202776387961e-06 | -0.521111789873616 | 0.0266832354469413  | 4 | Ssr4        |
| 2.01366448741599e-06 | -0.801729202042549 | 0.0278107202357023  | 4 | B4galt1     |
| 2.1527824009987e-06  | 0.585850685125911  | 0.0297320777401931  | 4 | Plekha3     |
| 2.17435032662526e-06 | -0.457115694228212 | 0.0300299523610215  | 4 | Tmsb10      |
| 2.21965933843099e-06 | -0.597825166015925 | 0.0306557151230704  | 4 | Dnajc3      |
| 2.22326918402838e-06 | -0.405141908712404 | 0.030705570700616   | 4 | Zeb2        |
| 2.25303801824082e-06 | -0.56              | 0.031116708069924   | 4 | Lgals9      |
| 2.27921206825573e-06 | 0.685291440706146  | 0.0314781978746799  | 4 | Cnn2        |
| 2.45634748119036e-06 | 0.374835085237409  | 0.03                | 4 | Ptplad2     |
| 2.45899732173975e-06 | -1.49              | 0.0339612120105476  | 4 | Apod        |
| 2.51813394010461e-06 | 0.716408810793407  | 0.0347779478467847  | 4 | Zc2hc1a     |
| 2.67931940101186e-06 | -0.369736420058774 | 0.0370040802473749  | 4 | Tmem50a     |
| 2.70606095410331e-06 | -0.335307968919841 | 0.0373734078371209  | 4 | Nos3        |
| 2.76876267856535e-06 | 0.996624942246156  | 0.038239381353666   | 4 | Tfr         |

|                      |                    |                    |   |           |
|----------------------|--------------------|--------------------|---|-----------|
| 2.83996343277663e-06 | -0.254883997407911 | 0.039222734970078  | 4 | Prdx1     |
| 2.88198880014016e-06 | -1.03              | 0.0398031473187358 | 4 | Aspn      |
| 2.94896622522781e-06 | 0.498613724747595  | 0.0407281725366213 | 4 | Aplp2     |
| 2.95553063413087e-06 | 1.31               | 0.0408188335879814 | 4 | Mark1     |
| 3.03014618796299e-06 | 0.354119128069539  | 0.0418493490019569 | 4 | Slc4a3    |
| 3.10179689028923e-06 | -0.25              | 0.0428389168517845 | 4 | Tram1     |
| 3.14173615702956e-06 | -0.849726268012911 | 0.0433905180647353 | 4 | Sash1     |
| 3.16019701160784e-06 | 0.82               | 0.0436454809273158 | 4 | Ethe1     |
| 3.18451783913827e-06 | 0.456532206197047  | 0.0439813758763386 | 4 | Zyx       |
| 3.28278313591166e-06 | -0.546338994740191 | 0.045338517890076  | 4 | Gnb1      |
| 3.28447809810375e-06 | -0.425506217209954 | 0.045361927012911  | 4 | Emp3      |
| 3.45590251030398e-06 | -0.705649884086447 | 0.0477294695698083 | 4 | Eif3f     |
| 3.53413849156856e-06 | 0.583646519160979  | 0.0488099867070534 | 4 | Rasal2    |
| 3.54671149402659e-06 | 0.913439582275703  | 0.0489836324440013 | 4 | Ptpla     |
| 3.61028932936962e-06 | -0.411475808946395 | 0.0498617059279239 | 4 | Ywhae     |
| 3.70889694338153e-06 | -1.48              | 0.0512235756850423 | 4 | Comp      |
| 3.72217056255812e-06 | -1.63              | 0.0514068976394902 | 4 | Pdgfrl    |
| 3.72769691635558e-06 | 0.69               | 0.0514832221117869 | 4 | Fry       |
| 3.73226947227053e-06 | -0.458389343625644 | 0.0515463736815282 | 4 | Col6a1    |
| 3.89655897512112e-06 | -1.63              | 0.0538153760053978 | 4 | Lbp       |
| 3.99705221998563e-06 | 1.27               | 0.0552032882102215 | 4 | Tpd52     |
| 4.1205401657131e-06  | 1.33               | 0.0569087802286637 | 4 | Adck3     |
| 4.12699803355196e-06 | 0.357260953294247  | 0.0569979698413861 | 4 | Nf2       |
| 4.16711813877707e-06 | 0.785642188306193  | 0.0575520686146501 | 4 | Ptp4a3    |
| 4.20797773399108e-06 | 0.675503729268717  | 0.0581163804841508 | 4 | Nrtn      |
| 4.33031680067573e-06 | -0.554728078914835 | 0.0598060053341325 | 4 | Smdt1     |
| 4.78988227128162e-06 | -1.42              | 0.0661530640486705 | 4 | Tnfaip6   |
| 5.1116057068235e-06  | -0.37              | 0.0705963864169394 | 4 | Vcan      |
| 5.31078815202576e-06 | -0.757432314831212 | 0.0733472951676277 | 4 | Fkbp7     |
| 5.52275372986456e-06 | -1.46              | 0.0762747517631595 | 4 | Tmem119   |
| 6.12101221542147e-06 | 0.836415831397256  | 0.0845372997071859 | 4 | Npr1      |
| 6.27060435307219e-06 | 0.55               | 0.09               | 4 | Parm1     |
| 6.28655223983877e-06 | 0.698335655498763  | 0.0868235729844132 | 4 | Nqo1      |
| 6.47945252380124e-06 | -0.484078023040964 | 0.0894877188062189 | 4 | Cnbp      |
| 6.70040578853E-06    | -1.63              | 0.0925393043453878 | 4 | Rftn1     |
| 6.94075997231601e-06 | -0.636708597017112 | 0.0958588359776564 | 4 | Tmem176b  |
| 7.06781866253098e-06 | -1.55              | 0.0976136435482154 | 4 | Dio2      |
| 7.15505193997885e-06 | 0.350663699614119  | 0.098818422343048  | 4 | Boc       |
| 7.17997362992032e-06 | 0.421035857389594  | 0.0991626158028296 | 4 | Hsph1     |
| 7.65851369013323e-06 | 0.683287613751428  | 0.11               | 4 | Chd3      |
| 7.69637799600268e-06 | -0.312192280451684 | 0.106294676502793  | 4 | Serpinb6a |
| 7.69651867273332e-06 | -0.410412697420828 | 0.11               | 4 | Ppap2a    |
| 8.10821075651563e-06 | 1.32               | 0.111982498758237  | 4 | Plekho1   |
| 8.16551633459039e-06 | -1.09              | 0.112773946097028  | 4 | Csf1      |
| 8.36627161892616e-06 | -0.649034995783987 | 0.115546577328989  | 4 | Tmed3     |
| 8.42522644075778e-06 | -1.33              | 0.116360802373306  | 4 | Col16a1   |
| 8.44533059903172e-06 | 0.336157482601994  | 0.116638460903227  | 4 | Tgm2      |
| 9.44804581469724e-06 | 0.570689500015116  | 0.130486960746784  | 4 | Ttll7     |
| 9.94750268746862e-06 | -0.38              | 0.137384959616629  | 4 | Rpl18a    |
| 9.98508854696635e-06 | 0.410212588083613  | 0.137904057922152  | 4 | Sorbs1    |
| 1.00661256502088e-05 | 0.713322566607896  | 0.139023261355034  | 4 | Dusp3     |
| 1.01237146540637e-05 | 0.790084026350634  | 0.139818623087273  | 4 | Dhrs3     |
| 1.02355584536364e-05 | 0.388901967759906  | 0.141363297803173  | 4 | Gripap1   |
| 1.06570081442202e-05 | -1.44              | 0.147183939479825  | 4 | H2-T23    |
| 1.09456928502834e-05 | 0.34               | 0.151170963955263  | 4 | Esam      |
| 1.10570401567009e-05 | -1.03              | 0.152708781604196  | 4 | Akap12    |

|                      |                    |                   |   |             |
|----------------------|--------------------|-------------------|---|-------------|
| 1.1224221432163e-05  | -1.69              | 0.155017722199604 | 4 | Svep1       |
| 1.17065119849041e-05 | 0.348082151772605  | 0.161678637023511 | 4 | Ndrg2       |
| 1.17756849195086e-05 | -0.48              | 0.162633984423333 | 4 | Pcbp2       |
| 1.23590163810366e-05 | 0.420541304053389  | 0.170690375238497 | 4 | Pkdcc       |
| 1.26489467613405e-05 | 0.823389083101463  | 0.174694603720873 | 4 | Kif1c       |
| 1.28886017066413e-05 | 1.01               | 0.178004478170423 | 4 | Fyco1       |
| 1.31620526843619e-05 | -0.414002919062389 | 0.181781109623722 | 4 | Wwtr1       |
| 1.33426533080654e-05 | -0.929645541660831 | 0.184275384837691 | 4 | Gaa         |
| 1.3377740658269e-05  | 0.271442055546281  | 0.184759976231353 | 4 | Tln1        |
| 1.3452882481659e-05  | -0.622766383798146 | 0.185797759954193 | 4 | Hexb        |
| 1.36335149239274e-05 | -0.969547142961402 | 0.188292474614361 | 4 | Ptgs2       |
| 1.37645696099082e-05 | -0.837724439403292 | 0.190102470882442 | 4 | Herpud1     |
| 1.42147096797936e-05 | 0.50               | 0.196319355387629 | 4 | Gstk1       |
| 1.47746333273425e-05 | 0.577447887770949  | 0.204052460883928 | 4 | Farsb       |
| 1.51273881123958e-05 | -0.363715123087711 | 0.208924357220298 | 4 | Gas6        |
| 1.51834959639577e-05 | -1.38              | 0.21              | 4 | Zfp521      |
| 1.52535744493746e-05 | 0.77               | 0.210667116720312 | 4 | Hspa2       |
| 1.53665406502272e-05 | 0.595291821317266  | 0.212227292920288 | 4 | Nkd1        |
| 1.54831289054993e-05 | -1.73              | 0.213837493313851 | 4 | Gpnmb       |
| 1.56503396877056e-05 | -1.55              | 0.216146841426903 | 4 | Aff3        |
| 1.62456243524446e-05 | 0.840025505727736  | 0.224368317931613 | 4 | 2310022B05I |
| 1.65048361782555e-05 | -0.761106406647662 | 0.227948292457887 | 4 | Ramp2       |
| 1.70600951185206e-05 | -0.830944874130524 | 0.235616973681889 | 4 | Swi5        |
| 1.70829230800641e-05 | -0.937491684572665 | 0.235932250658766 | 4 | Ddah2       |
| 1.73009865473768e-05 | 0.502204326076916  | 0.238943925205821 | 4 | Lonp1       |
| 1.73384283250131e-05 | 1.42               | 0.239461033596756 | 4 | Slc24a3     |
| 1.74942044648371e-05 | 0.684442365905838  | 0.241612457863865 | 4 | Xk          |
| 1.75695416697282e-05 | 0.799108971572522  | 0.242652940000617 | 4 | Ptms        |
| 1.79125129215045e-05 | 0.816648124343119  | 0.247389715958899 | 4 | Glipr1      |
| 1.81592274150672e-05 | -0.390406306280597 | 0.250797089829493 | 4 | Sqstm1      |
| 1.84794200832751e-05 | -0.378599031611055 | 0.255219270770113 | 4 | Hint1       |
| 1.92963083212442e-05 | -0.340981336191799 | 0.266501314224704 | 4 | Rac1        |
| 1.94308268559894e-05 | -0.653879897508176 | 0.27              | 4 | Sdc2        |
| 1.99961348780714e-05 | -0.417820747600261 | 0.276166618801044 | 4 | Tmed10      |
| 2.23197405822071e-05 | -0.925510977701371 | 0.308257937180863 | 4 | Spon1       |
| 2.23742739818729e-05 | -1.02              | 0.309011097963647 | 4 | Anpep       |
| 2.2443600776083e-05  | -0.574118742481528 | 0.309968570318482 | 4 | Vcam1       |
| 2.34769036045847e-05 | -0.270574943757923 | 0.324239515682919 | 4 | Rabac1      |
| 2.35375788944314e-05 | -1.17              | 0.325077502110993 | 4 | Fam102b     |
| 2.49774212432282e-05 | 0.717535352580472  | 0.344963164790224 | 4 | Capzb       |
| 2.52364255577031e-05 | 0.582117437959543  | 0.348540273377437 | 4 | Zbtb6       |
| 2.6651623034993e-05  | -1.08              | 0.368085565736289 | 4 | Nfkb1       |
| 2.69036909421511e-05 | -0.375498926730228 | 0.371566875602048 | 4 | Pdia3       |
| 2.70065508892742e-05 | 1.09               | 0.372987474331766 | 4 | Inhba       |
| 2.7328534950051e-05  | 0.825206014148078  | 0.377434396195155 | 4 | Sncg        |
| 2.74873340966872e-05 | 0.904793846314766  | 0.379627571209347 | 4 | Cdc42ep3    |
| 2.75614987505938e-05 | 0.650384944212711  | 0.380651859244451 | 4 | Mcm6        |
| 2.76043033628194e-05 | -0.310738654548415 | 0.381243033743899 | 4 | Prep        |
| 2.94602429916318e-05 | -0.707181445314812 | 0.406875415957427 | 4 | Itgbl1      |
| 3.07393116173023e-05 | -0.692081953033163 | 0.424540632746562 | 4 | Bmp1        |
| 3.07499440902323e-05 | 0.273651366498842  | 0.424687477830198 | 4 | Flnb        |
| 3.10944396853165e-05 | -1.28              | 0.429445306493906 | 4 | Fbln7       |
| 3.18851094451999e-05 | -0.795926789564823 | 0.440365246547656 | 4 | Pid1        |
| 3.20313762537486e-05 | 0.400126132159343  | 0.442385337440522 | 4 | Tbx18       |
| 3.23681631691043e-05 | -0.921662856126327 | 0.447036701528499 | 4 | Fnip1       |
| 3.2642465242086e-05  | 1.27               | 0.45              | 4 | Lphn2       |



|                      |                    |                   |   |             |
|----------------------|--------------------|-------------------|---|-------------|
| 3.28848494134494e-05 | -0.965420235201889 | 0.454172655249149 | 4 | Arpc5       |
| 3.32304220789783e-05 | 0.520108790420441  | 0.458945359332769 | 4 | Alcam       |
| 3.32616368463243e-05 | -1.20              | 0.459376466484585 | 4 | Jam2        |
| 3.38485013883482e-05 | 0.777378113173607  | 0.467481652674477 | 4 | Me1         |
| 3.42034715837254e-05 | 1.03               | 0.472384146042832 | 4 | Map3k7cl    |
| 3.43171781886175e-05 | 0.278270284696499  | 0.473954547962997 | 4 | Col4a2      |
| 3.70092707851775e-05 | 1.06               | 0.511135038814087 | 4 | Fam129a     |
| 3.75967509541929e-05 | 0.775343229576682  | 0.519248727428358 | 4 | Serpine1    |
| 3.81929779203646e-05 | 1.28               | 0.527483218058155 | 4 | Tmem47      |
| 3.85132309715166e-05 | 0.598598257148228  | 0.531906232947615 | 4 | Sparcl1     |
| 3.85799186867646e-05 | -0.834060969689052 | 0.532827256982907 | 4 | Cmtm3       |
| 4.08941760923632e-05 | 0.312398182110894  | 0.564789466011629 | 4 | Zfp322a     |
| 4.12440534889509e-05 | 1.43               | 0.569621622735901 | 4 | Tcap        |
| 4.14430468400599e-05 | -0.510004631582455 | 0.572369919908068 | 4 | Pomp        |
| 4.18986190783851e-05 | 0.550619447623473  | 0.578661828091576 | 4 | Mgat4a      |
| 4.31664771023905e-05 | 1.29               | 0.596172215261115 | 4 | Tmem38b     |
| 4.34725924328056e-05 | 0.497611744487015  | 0.600399974089478 | 4 | Cfl2        |
| 4.38699513562679e-05 | -1.58              | 0.605887898181416 | 4 | Tcf21       |
| 4.43495427133427e-05 | 0.622557096868763  | 0.612511534413976 | 4 | Myl6        |
| 4.748287383491E-05   | -1.21              | 0.655785970533942 | 4 | Aldh3a1     |
| 4.98752623596605e-05 | -1.70              | 0.688827248449272 | 4 | Ptx3        |
| 4.99576553785839e-05 | 0.45               | 0.689965178433623 | 4 | Asap2       |
| 5.55901271550397e-05 | 0.601674064836867  | 0.767755246138254 | 4 | Iars2       |
| 5.61333323591054e-05 | -1.45              | 0.775257453211605 | 4 | Xdh         |
| 5.62878862400584e-05 | -0.899920088727519 | 0.777391996861446 | 4 | Mrc2        |
| 5.70370932267707e-05 | -1.23              | 0.79              | 4 | Tmem204     |
| 5.79448707367373e-05 | -1.66              | 0.800276609745079 | 4 | Gpr133      |
| 5.83461219141481e-05 | -1.10              | 0.81              | 4 | Steap4      |
| 5.84833883806858e-05 | 0.914223805511984  | 0.807714076925651 | 4 | Thrb        |
| 5.91232042548773e-05 | 0.883890515684325  | 0.816550573964111 | 4 | Erich1      |
| 6.45074498337596e-05 | 0.657553145313103  | 0.890912389654054 | 4 | Zfp266      |
| 6.71398625842586e-05 | -1.64              | 0.927268642151195 | 4 | Gsta3       |
| 6.75196878164973e-05 | 0.546655203277302  | 0.932514408433644 | 4 | Hbegf       |
| 6.83951786947221e-05 | 0.41               | 0.944605812952807 | 4 | Fstl3       |
| 6.84732200942901e-05 | -1.93              | 0.945683642722241 | 4 | Angptl7     |
| 6.89358014396575e-05 | -0.479715851622194 | 0.95              | 4 | Ddost       |
| 6.92741965071986e-05 | 1.79               | 0.96              | 4 | Pcgf5       |
| 7.27855211601994e-05 | -1.56              | 1.00              | 4 | Wnt5a       |
| 7.42514467794577e-05 | -1.61              | 1.00              | 4 | Ccl2        |
| 7.51423696817212e-05 | -1.87              | 1.00              | 4 | G0s2        |
| 7.78699290360514e-05 | 0.54               | 1.00              | 4 | Fat1        |
| 7.82456753177053e-05 | -0.369465550304395 | 1.00              | 4 | Jmjd1c      |
| 8.16428007697519e-05 | -0.271549567966273 | 1.00              | 4 | Ifitm7      |
| 8.61987050316765e-05 | -0.94              | 1.00              | 4 | Dclk1       |
| 8.62491867209241e-05 | -1.32              | 1.00              | 4 | Dtx4        |
| 8.68730878170185e-05 | -0.842353681772653 | 1.00              | 4 | Mmp14       |
| 8.87288996244983e-05 | -0.835479847539122 | 1.00              | 4 | Leprel2     |
| 8.90266238213087e-05 | 0.533670408864805  | 1.00              | 4 | Smoc1       |
| 8.91078333481117e-05 | 0.731915043674709  | 1.00              | 4 | Zfp568      |
| 8.94759857403262e-05 | 0.319187346772464  | 1.00              | 4 | Nxn         |
| 8.97579588481054e-05 | 1.03               | 1.00              | 4 | Rab11fip3   |
| 9.01789207367049e-05 | -0.829957806393632 | 1.00              | 4 | Sec11a      |
| 9.1034195272428e-05  | 0.307858917365906  | 1.00              | 4 | 2610002J02F |
| 9.5462457506206e-05  | -0.602302315458757 | 1.00              | 4 | Meg3        |
| 9.55624209837405e-05 | 0.605265008338082  | 1.00              | 4 | Anxa6       |
| 9.74295579878537e-05 | 0.332542306010465  | 1.00              | 4 | Fam118a     |



|                      |                    |      |   |           |
|----------------------|--------------------|------|---|-----------|
| 9.85164119025991e-05 | 0.449121429772066  | 1.00 | 4 | Iqgap1    |
| 0.00010153241470002  | -0.949203697147764 | 1.00 | 4 | Abca9     |
| 0.000102513530736633 | 0.28               | 1.00 | 4 | Myo1e     |
| 0.000103011988577244 | -0.919460306635434 | 1.00 | 4 | Fxyd5     |
| 0.000103964180475416 | 0.662958784220237  | 1.00 | 4 | Ptpnj     |
| 0.000105036469171709 | -0.263966627813129 | 1.00 | 4 | H2-K1     |
| 0.00011144725976723  | -0.475417744394354 | 1.00 | 4 | Capg      |
| 0.000112892960396046 | -1.35              | 1.00 | 4 | Fgf7      |
| 0.00011359746790723  | -1.31              | 1.00 | 4 | Mdk       |
| 0.000113798529786202 | 0.547080415406028  | 1.00 | 4 | Pitrm1    |
| 0.000114613694530039 | 0.351193525413342  | 1.00 | 4 | Mycbp     |
| 0.000117182634544781 | -0.859574690251989 | 1.00 | 4 | Cnot6     |
| 0.000117433634799883 | 0.319028302146281  | 1.00 | 4 | Zfhx3     |
| 0.000119294637224328 | 0.536348446704501  | 1.00 | 4 | Nrbp1     |
| 0.000121514135854873 | 1.10               | 1.00 | 4 | Mepce     |
| 0.00012552491545887  | -0.260139194736343 | 1.00 | 4 | Rps19-ps3 |
| 0.000125906987343974 | 0.646076204916595  | 1.00 | 4 | Ppp1r12c  |
| 0.000126246636238271 | -0.988114119902842 | 1.00 | 4 | Ifnar2    |
| 0.000127692236329367 | -0.257323393773779 | 1.00 | 4 | Atf4      |
| 0.000130002908566521 | 0.429406680516874  | 1.00 | 4 | Rnf123    |
| 0.00013157149509692  | 1.35               | 1.00 | 4 | Wtip      |
| 0.00013204477598815  | -1.03              | 1.00 | 4 | Gpx7      |
| 0.000133685465381438 | 0.84               | 1.00 | 4 | Nt5c3b    |
| 0.000135290479661798 | -0.568253203313128 | 1.00 | 4 | Mmp23     |
| 0.000136616507208821 | -1.50              | 1.00 | 4 | Meox2     |
| 0.000136695070285685 | 0.791304521599109  | 1.00 | 4 | Kpna3     |
| 0.00014139697713998  | 0.297306985046937  | 1.00 | 4 | Efnb2     |
| 0.000148754034703882 | -0.54              | 1.00 | 4 | Atp6ap2   |
| 0.000149368162587245 | 1.53               | 1.00 | 4 | Tmem110   |
| 0.00015385155462071  | -0.944963123038428 | 1.00 | 4 | Ece1      |
| 0.000154433544445652 | 0.376956050549811  | 1.00 | 4 | Kalm      |
| 0.000158415224791823 | 0.706940502692281  | 1.00 | 4 | Adarb1    |
| 0.000160585259979881 | 1.22               | 1.00 | 4 | Dtna      |
| 0.000162332784958479 | -1.32              | 1.00 | 4 | Naalad2   |
| 0.00016561614129977  | -0.897882460680095 | 1.00 | 4 | Irf1      |
| 0.000170508804520823 | 0.525669516645829  | 1.00 | 4 | Agl       |
| 0.000173793175070729 | -1.38              | 1.00 | 4 | Cd55      |
| 0.000175887961866542 | -0.533151118701961 | 1.00 | 4 | Ier3ip1   |
| 0.00018169727663968  | 0.479749656472131  | 1.00 | 4 | Tmem57    |
| 0.000185063774300052 | 0.413286386716996  | 1.00 | 4 | Strbp     |
| 0.000185420629934079 | 0.311606726925886  | 1.00 | 4 | Gps2      |
| 0.000185944374019162 | 0.381395800539162  | 1.00 | 4 | Itgb1     |
| 0.0001876599420434   | -0.443908436207105 | 1.00 | 4 | Gstp1     |
| 0.000188095355545193 | 0.450921567057702  | 1.00 | 4 | Fxr2      |
| 0.000190693568013717 | -0.490043278243911 | 1.00 | 4 | Atp5o     |
| 0.000192300536021579 | -0.891007209878442 | 1.00 | 4 | Mfap4     |
| 0.00019360274741031  | -0.70              | 1.00 | 4 | Gm15421   |
| 0.000197756520906439 | 0.298265118953869  | 1.00 | 4 | Fgd4      |
| 0.00019824994735367  | 0.552846312061479  | 1.00 | 4 | Itpr1     |
| 0.000198364602100318 | -1.73              | 1.00 | 4 | Hhip      |
| 0.00020200470870882  | -1.20              | 1.00 | 4 | Phlda1    |
| 0.00020331461100375  | -0.492118957506069 | 1.00 | 4 | Fndc3b    |
| 0.000205144265027536 | 0.605236298237565  | 1.00 | 4 | Cpeb3     |
| 0.000211872784730092 | -0.41              | 1.00 | 4 | Spcs1     |
| 0.000220713113127218 | -1.03              | 1.00 | 4 | Plekha6   |
| 0.000223954372944476 | 0.467903256134842  | 1.00 | 4 | Fbxo30    |

|                      |                    |      |   |             |
|----------------------|--------------------|------|---|-------------|
| 0.000227444179282866 | 0.29               | 1.00 | 4 | Mbnl1       |
| 0.000232392968997083 | 0.425463649680552  | 1.00 | 4 | Ctps        |
| 0.000235583875999545 | -1.23              | 1.00 | 4 | Fmo1        |
| 0.00023943230815133  | -1.26              | 1.00 | 4 | Nsg1        |
| 0.00023944322760655  | 0.638503341139053  | 1.00 | 4 | Ncaph2      |
| 0.000239447514990533 | 0.362294455444524  | 1.00 | 4 | Lynx1       |
| 0.000243320172643975 | -1.45              | 1.00 | 4 | Lhfp12      |
| 0.000243420911834719 | 1.43               | 1.00 | 4 | Grb14       |
| 0.000244265757341213 | -0.543590322019146 | 1.00 | 4 | Npdc1       |
| 0.000244723271478718 | -0.51              | 1.00 | 4 | Hnmph1      |
| 0.000247698616246379 | 1.09               | 1.00 | 4 | Isyna1      |
| 0.000247858216356125 | -0.285141177073588 | 1.00 | 4 | Laptm4a     |
| 0.000255343562483138 | -0.464250812109275 | 1.00 | 4 | Rps16       |
| 0.000262830196993611 | 0.320832111923249  | 1.00 | 4 | Gtf2a1      |
| 0.000263209864147886 | 0.42               | 1.00 | 4 | Hiat1       |
| 0.000266650413929794 | -1.34              | 1.00 | 4 | Ahsg        |
| 0.000272814460545465 | -0.779701832261891 | 1.00 | 4 | Snrpg       |
| 0.00027329609356765  | -1.12              | 1.00 | 4 | Tnfaip3     |
| 0.000274154869934106 | 0.298581036557752  | 1.00 | 4 | Spag7       |
| 0.000274563666108148 | -0.99              | 1.00 | 4 | Gstm5       |
| 0.000282036686856997 | 0.513135945043329  | 1.00 | 4 | Sertad1     |
| 0.000284012938110128 | -1.48              | 1.00 | 4 | AI507597    |
| 0.000284954424005827 | 0.483796951378071  | 1.00 | 4 | Mcur1       |
| 0.000290735632143319 | 0.558617428015089  | 1.00 | 4 | Ttc28       |
| 0.000291598007944069 | 0.673264092937368  | 1.00 | 4 | Cd59a       |
| 0.000295973515135775 | -1.31              | 1.00 | 4 | Ntrk2       |
| 0.000296827919949217 | 0.502111797081466  | 1.00 | 4 | Ano1        |
| 0.000299647082654579 | 1.33               | 1.00 | 4 | Ntrk3       |
| 0.000302854209885522 | -0.311023753186031 | 1.00 | 4 | Nav1        |
| 0.000303628980174081 | -0.73              | 1.00 | 4 | Rpl22l1     |
| 0.000306151107762363 | -1.50              | 1.00 | 4 | C2          |
| 0.000307453830969087 | -0.325999570742121 | 1.00 | 4 | Hdlbp       |
| 0.00031319850698707  | 1.73               | 1.00 | 4 | B3galt1     |
| 0.000317524704827032 | -1.35              | 1.00 | 4 | Mfap2       |
| 0.000320030227867775 | -0.808042987334969 | 1.00 | 4 | Glul        |
| 0.000339560785688861 | -1.32              | 1.00 | 4 | Ssh2        |
| 0.00034297504264959  | 0.574303870515885  | 1.00 | 4 | Btbd7       |
| 0.000361147281648453 | -0.842188719162099 | 1.00 | 4 | Os9         |
| 0.000362164844009965 | -1.01              | 1.00 | 4 | 0610031J06F |
| 0.00037375998716639  | 0.843764016347036  | 1.00 | 4 | Ttll1       |
| 0.000374386783809994 | 1.24               | 1.00 | 4 | Phf2        |
| 0.000379668456014121 | 0.728609176755926  | 1.00 | 4 | Fam214b     |
| 0.000380265383077398 | -0.602343205855326 | 1.00 | 4 | Tgoln1      |
| 0.000381810932228614 | 0.427781735498756  | 1.00 | 4 | Nek9        |
| 0.000385772266019229 | 0.465478370854387  | 1.00 | 4 | Chd6        |
| 0.000389137677049604 | -1.20              | 1.00 | 4 | Ccl19       |
| 0.000390460598446453 | 0.750615566194942  | 1.00 | 4 | Sept9       |
| 0.000393647698550763 | 0.337897330813706  | 1.00 | 4 | Cd24a       |
| 0.000393864211375521 | 1.90               | 1.00 | 4 | 3830406C13F |
| 0.000411767106556155 | -1.01              | 1.00 | 4 | Egfr        |
| 0.000415472737641666 | 0.633021512869274  | 1.00 | 4 | Tgfbf1      |
| 0.000416967426892532 | 0.650006580939929  | 1.00 | 4 | Specc1      |
| 0.000417220186754572 | -1.41              | 1.00 | 4 | Bdh2        |
| 0.000417535714863743 | 0.60               | 1.00 | 4 | Serpinb6b   |
| 0.000425595519416563 | 0.595584979816711  | 1.00 | 4 | Pkm         |
| 0.000427761595543843 | -1.41              | 1.00 | 4 | Myo6        |

|                      |                    |      |   |            |
|----------------------|--------------------|------|---|------------|
| 0.000428553798148918 | -1.06              | 1.00 | 4 | Slc16a2    |
| 0.00043096178279973  | -0.746176354673011 | 1.00 | 4 | Cyba       |
| 0.000436249104776817 | -0.865101230853741 | 1.00 | 4 | Sgce       |
| 0.000440376273245801 | 0.544184353409264  | 1.00 | 4 | Qsox1      |
| 0.000442767450805042 | -0.83              | 1.00 | 4 | Raph1      |
| 0.000454765404040143 | -0.441986049753087 | 1.00 | 4 | Fkbp9      |
| 0.000457444268085309 | 0.34               | 1.00 | 4 | Pygm       |
| 0.000459919548394826 | 0.59               | 1.00 | 4 | Prdm6      |
| 0.000470422635051169 | 0.48               | 1.00 | 4 | Fermt2     |
| 0.000480898288339646 | -0.336370629236478 | 1.00 | 4 | Tmem256    |
| 0.000488265751358919 | -0.365600201827359 | 1.00 | 4 | Lrpap1     |
| 0.000489102559770715 | -1.31              | 1.00 | 4 | Dapk1      |
| 0.000489988730389095 | 1.77               | 1.00 | 4 | D16Ert472e |
| 0.000495425811917435 | -0.423226931862714 | 1.00 | 4 | Rpl39      |
| 0.000500827021139822 | -1.24              | 1.00 | 4 | Fndc1      |
| 0.000508658698807176 | -0.285463658715521 | 1.00 | 4 | Rps15a     |
| 0.000521343528238153 | 0.621713750231157  | 1.00 | 4 | Ppp1r12b   |
| 0.000525780285586845 | 1.07               | 1.00 | 4 | Myo9b      |
| 0.000537834223188166 | -1.23              | 1.00 | 4 | Sfrp4      |
| 0.000539615382421339 | -0.77              | 1.00 | 4 | Tgif1      |
| 0.000544933859666883 | -1.22              | 1.00 | 4 | Lamb1      |
| 0.000547737309085078 | -0.659851974858136 | 1.00 | 4 | Colec12    |
| 0.000548092528866936 | 0.51               | 1.00 | 4 | Eef2k      |
| 0.000551314505287254 | 1.05               | 1.00 | 4 | Tead3      |
| 0.000553704278766567 | -0.633910118643541 | 1.00 | 4 | Jak1       |
| 0.000555977646779584 | 0.980899265497315  | 1.00 | 4 | Mfhas1     |
| 0.00056242659464458  | 1.48               | 1.00 | 4 | Mmd        |
| 0.000579387793076602 | 1.18               | 1.00 | 4 | Plekhg3    |
| 0.000580084592255123 | 0.314449456155312  | 1.00 | 4 | Ddb1       |
| 0.000586029170047794 | -1.13              | 1.00 | 4 | Tmem176a   |
| 0.000598790527679177 | -0.527956872267677 | 1.00 | 4 | Islr       |
| 0.000608811472003728 | -0.868088630056277 | 1.00 | 4 | Tgfb3      |
| 0.000616131221492115 | -0.337743326258913 | 1.00 | 4 | Ndufa13    |
| 0.000619688292903589 | -0.444698544724495 | 1.00 | 4 | Ddr2       |
| 0.000623348330613196 | 0.542433885871775  | 1.00 | 4 | Ldlrad4    |
| 0.000626369509482458 | -1.14              | 1.00 | 4 | Rasa3      |
| 0.000637005045757464 | -0.446461707284787 | 1.00 | 4 | Acap2      |
| 0.0006417499388607   | 0.443154883088547  | 1.00 | 4 | Dcaf8      |
| 0.00064712404382841  | -1.26              | 1.00 | 4 | Ildr2      |
| 0.000672268032192542 | -0.85              | 1.00 | 4 | Tiparp     |
| 0.000684448829752962 | -0.963571438426246 | 1.00 | 4 | Birc3      |
| 0.000697784068466049 | -1.29              | 1.00 | 4 | Ccbe1      |
| 0.000700671734717499 | 0.335124753078485  | 1.00 | 4 | Cib1       |
| 0.000703162707597119 | -0.351135804450288 | 1.00 | 4 | Anxa1      |
| 0.000710003280243759 | 1.09               | 1.00 | 4 | Akt3       |
| 0.000717332000161755 | -0.991952282143925 | 1.00 | 4 | Ndufa4l2   |
| 0.000727291697789526 | -0.740333081195051 | 1.00 | 4 | Cebpg      |
| 0.000736910940753187 | -0.885727706073277 | 1.00 | 4 | Ggh        |
| 0.00075308168981209  | -0.820273147452022 | 1.00 | 4 | Rhou       |
| 0.000763103058981471 | 0.445908908231994  | 1.00 | 4 | Ubxn2a     |
| 0.00076764077286114  | -1.36              | 1.00 | 4 | Abca8b     |
| 0.000769254638109264 | 0.566508599652251  | 1.00 | 4 | Stx17      |
| 0.000772049816536876 | 0.36               | 1.00 | 4 | Brnp2      |
| 0.00078383729596355  | -0.266445866412367 | 1.00 | 4 | Mrfap1     |
| 0.00080418473326216  | 0.782386105008361  | 1.00 | 4 | Pdgfc      |
| 0.000805618145884741 | -1.51              | 1.00 | 4 | Deptor     |

|                      |                    |      |   |             |
|----------------------|--------------------|------|---|-------------|
| 0.000807955443957472 | 0.364251800728288  | 1.00 | 4 | Tcta        |
| 0.000810467154330712 | -0.856309647032218 | 1.00 | 4 | Sox9        |
| 0.000812574129488468 | 1.52               | 1.00 | 4 | Art3        |
| 0.000820692479766307 | 0.313006034684092  | 1.00 | 4 | Igf1r       |
| 0.000821972114172655 | 0.37               | 1.00 | 4 | Kif13a      |
| 0.000823638021661516 | 0.323961263559911  | 1.00 | 4 | Hcfc1r1     |
| 0.000830566056278977 | -1.65              | 1.00 | 4 | S1pr3       |
| 0.000843051964934839 | 0.823225859470545  | 1.00 | 4 | Nat6        |
| 0.000847005748841771 | 0.661921143876243  | 1.00 | 4 | Atrip       |
| 0.000848271570800825 | -1.28              | 1.00 | 4 | Ssc5d       |
| 0.000852106262114037 | -1.48              | 1.00 | 4 | Itm2a       |
| 0.000853910668059401 | -1.71              | 1.00 | 4 | Has1        |
| 0.000867165619674816 | 0.700626353853318  | 1.00 | 4 | Pip5k1c     |
| 0.000867444802013965 | 0.760716899473086  | 1.00 | 4 | Coro1c      |
| 0.00087824178202755  | 0.407068874715915  | 1.00 | 4 | Tbxa2r      |
| 0.000878849491308035 | -0.715771381641815 | 1.00 | 4 | Ptgfrn      |
| 0.000879129110799906 | 0.940840918579929  | 1.00 | 4 | Itga3       |
| 0.000881689966198416 | 0.802928878521245  | 1.00 | 4 | Prkar2a     |
| 0.000888376591580592 | -1.24              | 1.00 | 4 | Gbp7        |
| 0.000922000436563401 | -0.663371696618645 | 1.00 | 4 | Nop58       |
| 0.000924488341188512 | 0.933677422683135  | 1.00 | 4 | Id4         |
| 0.000925581396885058 | -1.53              | 1.00 | 4 | Ebf2        |
| 0.000953287128703449 | -0.874159789052259 | 1.00 | 4 | Sdc3        |
| 0.000955555106151143 | -1.24              | 1.00 | 4 | Podn        |
| 0.000958954162584348 | 1.03               | 1.00 | 4 | Cog4        |
| 0.000963862061847047 | -1.33              | 1.00 | 4 | Prrx2       |
| 0.000969438835282092 | -1.18              | 1.00 | 4 | Man1c1      |
| 0.000979684594510729 | -0.952763924187924 | 1.00 | 4 | Cdon        |
| 0.000991737977377919 | 0.498259083484051  | 1.00 | 4 | 2010111I01R |
| 0.00103656818337363  | -0.97              | 1.00 | 4 | 3632451O06  |
| 0.00106265254449455  | 0.740909361952431  | 1.00 | 4 | Smarca4     |
| 0.00106528573252416  | 0.923127504213131  | 1.00 | 4 | Rnf220      |
| 0.00106859447049662  | 0.544196373328674  | 1.00 | 4 | Ptpn21      |
| 0.00107124277466922  | 0.85               | 1.00 | 4 | Tesk1       |
| 0.00109026399637354  | -1.46              | 1.00 | 4 | Gas7        |
| 0.00110521509251071  | -0.800534519017298 | 1.00 | 4 | Prss12      |
| 0.00110804125330566  | -1.22              | 1.00 | 4 | Cpt1a       |
| 0.00110868492832495  | 0.418956907548634  | 1.00 | 4 | Cped1       |
| 0.00110942239131243  | 0.650266850754438  | 1.00 | 4 | S100a4      |
| 0.00112240057441214  | -1.09              | 1.00 | 4 | Mxra7       |
| 0.00112532966671257  | 0.634279374670345  | 1.00 | 4 | Fam210a     |
| 0.00113022134261844  | -0.912478777699848 | 1.00 | 4 | Smim3       |
| 0.00113414018732639  | 0.926382059959057  | 1.00 | 4 | Sema5a      |
| 0.00115098824940552  | -0.40              | 1.00 | 4 | Vwf         |
| 0.00115888349287999  | 0.628563074337806  | 1.00 | 4 | Flnc        |
| 0.00117145514873193  | 0.955930388129416  | 1.00 | 4 | Eml1        |
| 0.00118583667746163  | -0.409449674454127 | 1.00 | 4 | Prdx4       |
| 0.00118819427827307  | -0.541533190976133 | 1.00 | 4 | Sfrp1       |
| 0.0012051077233619   | -0.743090112470741 | 1.00 | 4 | Fam63b      |
| 0.00121432517672178  | 0.679131785234937  | 1.00 | 4 | Polr2b      |
| 0.00122265382108219  | -1.40              | 1.00 | 4 | C1qtnf7     |
| 0.0012261314058896   | 1.08               | 1.00 | 4 | Cap2        |
| 0.00126928327955428  | -0.917416510505211 | 1.00 | 4 | Gba         |
| 0.00129110168834528  | -1.03              | 1.00 | 4 | Lrp6        |
| 0.00130317453775671  | 0.53               | 1.00 | 4 | Tsc22d1     |
| 0.00131072142439357  | -0.916483651716559 | 1.00 | 4 | Gpr64       |

|                     |                    |      |   |           |
|---------------------|--------------------|------|---|-----------|
| 0.00131302417972457 | -0.693103829524933 | 1.00 | 4 | Cdkn1a    |
| 0.00131447296390082 | 0.674035066249877  | 1.00 | 4 | Myo1c     |
| 0.00131949144014641 | 0.275643208566876  | 1.00 | 4 | Ppp1cb    |
| 0.00132582177549558 | 0.303584655015984  | 1.00 | 4 | Sgk1      |
| 0.00133080114097669 | 0.521727230923842  | 1.00 | 4 | Agm       |
| 0.00134125419028482 | -1.04              | 1.00 | 4 | Itih5     |
| 0.00134447553160267 | 0.843412124764751  | 1.00 | 4 | Serf2     |
| 0.0013609664465522  | -0.59              | 1.00 | 4 | Dpysl2    |
| 0.0013817541933219  | -0.895967782730261 | 1.00 | 4 | Cpne8     |
| 0.00139023187153929 | 0.887484732625073  | 1.00 | 4 | Mrps15    |
| 0.00139877505611816 | -1.04              | 1.00 | 4 | Gpr153    |
| 0.00140980849205875 | -1.41              | 1.00 | 4 | Vit       |
| 0.00142944719774945 | -0.419968536188333 | 1.00 | 4 | Gtf2h5    |
| 0.00144975373927673 | -0.838649143880268 | 1.00 | 4 | Gpc3      |
| 0.00145703648876414 | 0.721349973912433  | 1.00 | 4 | Asb2      |
| 0.00146765766708146 | -0.597203939724225 | 1.00 | 4 | Map4k4    |
| 0.00148940848482611 | -1.20              | 1.00 | 4 | Angptl1   |
| 0.00148970749762148 | -0.49              | 1.00 | 4 | Ntn1      |
| 0.0015053395064277  | -0.445505061754337 | 1.00 | 4 | Scarb2    |
| 0.00151314693359621 | -0.439061014585783 | 1.00 | 4 | Olfml2b   |
| 0.00153677444233786 | -1.04              | 1.00 | 4 | Hand2     |
| 0.00155293818337302 | 0.535809296649477  | 1.00 | 4 | Prkag2    |
| 0.00155810130341445 | -1.02              | 1.00 | 4 | Snrpa1    |
| 0.00160340965065291 | 0.297943070176572  | 1.00 | 4 | Sipa1l1   |
| 0.00161212993498553 | -0.253204841508514 | 1.00 | 4 | Ost4      |
| 0.0016164683363373  | -1.06              | 1.00 | 4 | Gprc5b    |
| 0.00162335857358158 | -0.755855749878476 | 1.00 | 4 | Cnpy2     |
| 0.00163096079956787 | 0.847645059429217  | 1.00 | 4 | Pomgnt1   |
| 0.00163719847519831 | -0.647250613043192 | 1.00 | 4 | Tmcc1     |
| 0.00164196240172296 | 1.67               | 1.00 | 4 | Msra      |
| 0.00167842484961704 | -0.545417115169243 | 1.00 | 4 | Atp5l     |
| 0.00168857319528906 | -0.630343297788527 | 1.00 | 4 | Prrx1     |
| 0.00171030181364665 | 0.597591118966363  | 1.00 | 4 | Arl4a     |
| 0.00172658498230585 | -1.15              | 1.00 | 4 | Epyc      |
| 0.00172763774977438 | -1.15              | 1.00 | 4 | Trf       |
| 0.00173623115330723 | -0.900177430116437 | 1.00 | 4 | Papss2    |
| 0.00175851383825431 | 0.414549194117353  | 1.00 | 4 | Lrrc58    |
| 0.00177145448774134 | 0.901582543874276  | 1.00 | 4 | Ttc39b    |
| 0.00178670580303811 | 1.02               | 1.00 | 4 | Gnb4      |
| 0.00180169421855208 | -1.32              | 1.00 | 4 | Asap3     |
| 0.00180325604840175 | 0.390836580753977  | 1.00 | 4 | Olfir1033 |
| 0.00180487035709531 | 1.28               | 1.00 | 4 | Sgca      |
| 0.00180932897216656 | -0.70              | 1.00 | 4 | Pgs1      |
| 0.00181185335878988 | 0.59               | 1.00 | 4 | Camk2d    |
| 0.00181471932814099 | -1.54              | 1.00 | 4 | Lsamp     |
| 0.00181886610489781 | -1.04              | 1.00 | 4 | Fmn12     |
| 0.00182690030098313 | 1.01               | 1.00 | 4 | Adcy9     |
| 0.00184504780358099 | 0.938758443680062  | 1.00 | 4 | Naa50     |
| 0.00185553567519397 | -1.31              | 1.00 | 4 | Enc1      |
| 0.00187472162550724 | 0.38               | 1.00 | 4 | Ccdc107   |
| 0.00189879829474481 | -0.846720872284408 | 1.00 | 4 | Tgfb3     |
| 0.00190753398669163 | -0.34              | 1.00 | 4 | Xbp1      |
| 0.00191264702891143 | -1.41              | 1.00 | 4 | Cxcl14    |
| 0.00191514059326378 | 0.306166568159997  | 1.00 | 4 | Ankrd1    |
| 0.00191633603173986 | 0.537766066104562  | 1.00 | 4 | Rasl11b   |
| 0.00193602988248872 | 0.823337152434104  | 1.00 | 4 | Crbn      |



|                     |                    |      |   |             |
|---------------------|--------------------|------|---|-------------|
| 0.0019474024426948  | 0.498190133106721  | 1.00 | 4 | Kpna1       |
| 0.00196160777198306 | 1.37               | 1.00 | 4 | Fh1         |
| 0.00196502696946731 | -0.622632157601371 | 1.00 | 4 | Tcn2        |
| 0.00199495311483849 | -1.29              | 1.00 | 4 | Emilin2     |
| 0.00199841518820657 | -0.253236705766776 | 1.00 | 4 | Ppp1r15a    |
| 0.00200242243527483 | -0.418625432387099 | 1.00 | 4 | Rap1b       |
| 0.00201224197968555 | 0.435967256728364  | 1.00 | 4 | Itga1       |
| 0.00202377162309437 | -0.620893191506111 | 1.00 | 4 | Nbl1        |
| 0.00202993841221719 | 0.675379697780063  | 1.00 | 4 | 1810055G02  |
| 0.00208456001152249 | 0.287064035512534  | 1.00 | 4 | Pgpep1      |
| 0.00210578364137082 | -0.67              | 1.00 | 4 | Il1r1       |
| 0.00211621347948123 | 0.72               | 1.00 | 4 | Mmm2        |
| 0.00213004087022175 | -1.27              | 1.00 | 4 | Sorcs2      |
| 0.00213912064322015 | -1.12              | 1.00 | 4 | Tbx20       |
| 0.00216059844703346 | -0.705126468037251 | 1.00 | 4 | Baiap2      |
| 0.00217630751723501 | 0.424861768251708  | 1.00 | 4 | Atp1a2      |
| 0.00218298177094331 | -1.25              | 1.00 | 4 | Fst         |
| 0.00218563342407824 | 0.372678211721871  | 1.00 | 4 | Dnajc15     |
| 0.00219126693530124 | 0.625671051867559  | 1.00 | 4 | Cog2        |
| 0.00219280103587394 | -1.63              | 1.00 | 4 | Slc10a6     |
| 0.00219440956455066 | 0.544556946147197  | 1.00 | 4 | Rab3gap2    |
| 0.00220549028644433 | -1.27              | 1.00 | 4 | 1700025G04  |
| 0.00221458293170824 | -0.261969658082235 | 1.00 | 4 | Rpl10       |
| 0.00223003710511183 | 1.02               | 1.00 | 4 | Abcc1       |
| 0.00223949394512843 | -1.25              | 1.00 | 4 | F3          |
| 0.00225094791567305 | 1.23               | 1.00 | 4 | Mical3      |
| 0.00226894287718573 | -0.546430553386434 | 1.00 | 4 | Scd2        |
| 0.00227950142422927 | -0.526140385791726 | 1.00 | 4 | Nfe2l2      |
| 0.00228750335307226 | -1.07              | 1.00 | 4 | Tshz2       |
| 0.00230832682300186 | 0.38               | 1.00 | 4 | Enpp4       |
| 0.00235329604863425 | -1.07              | 1.00 | 4 | Enpp3       |
| 0.00242112843411184 | -0.545670559377153 | 1.00 | 4 | Gpx8        |
| 0.00243586576077139 | 0.548453057323821  | 1.00 | 4 | Synpo       |
| 0.00246997962925173 | 0.633534171839021  | 1.00 | 4 | Atp8b1      |
| 0.0024708015699309  | 0.59               | 1.00 | 4 | Zbtb7a      |
| 0.00249365032435185 | 1.01               | 1.00 | 4 | Actr1a      |
| 0.00249779185256419 | 0.983178339425644  | 1.00 | 4 | Sharpin     |
| 0.00252754445538096 | -1.24              | 1.00 | 4 | Farp1       |
| 0.00255615130895988 | 0.346759090115863  | 1.00 | 4 | Sypl        |
| 0.0025878454965414  | -0.453314575104899 | 1.00 | 4 | Mllt4       |
| 0.00259198766989997 | -0.619424493094005 | 1.00 | 4 | Erp44       |
| 0.00259275297125174 | 0.414671266233594  | 1.00 | 4 | Anln        |
| 0.00265155153413543 | -0.798405929787298 | 1.00 | 4 | Birc2       |
| 0.00266320025405961 | 1.85               | 1.00 | 4 | D5Erttd579e |
| 0.00266347814368588 | 0.860536243548583  | 1.00 | 4 | Spsb1       |
| 0.00266482962499751 | 0.427547406059455  | 1.00 | 4 | Rexo2       |
| 0.00267030773277569 | -0.641584034964943 | 1.00 | 4 | Zfp655      |
| 0.00268371146521653 | 0.74               | 1.00 | 4 | Mrpl35      |
| 0.00269042314605612 | 0.761428687976351  | 1.00 | 4 | Lanc13      |
| 0.002701378414483   | -0.557955909036941 | 1.00 | 4 | Ablim1      |
| 0.00270210173280562 | 1.41               | 1.00 | 4 | Nit1        |
| 0.00271438472030718 | 0.732254094105023  | 1.00 | 4 | Mknk2       |
| 0.00272002870619326 | -0.445975466661575 | 1.00 | 4 | Kmt2e       |
| 0.00275021397314278 | -0.58              | 1.00 | 4 | R3hcc1l     |
| 0.0027581502237369  | 0.85               | 1.00 | 4 | Fert2       |
| 0.00278165977280244 | 0.480429429444753  | 1.00 | 4 | Unc45a      |

|                     |                    |      |   |             |
|---------------------|--------------------|------|---|-------------|
| 0.00282417929987912 | 1.10               | 1.00 | 4 | Heyl        |
| 0.00282986723477848 | -0.580049682399966 | 1.00 | 4 | Ikbip       |
| 0.00284200521637142 | 0.835647473842175  | 1.00 | 4 | Svil        |
| 0.00290728992790682 | 0.429595508021999  | 1.00 | 4 | Ext1        |
| 0.00291017738683793 | -0.434984403398001 | 1.00 | 4 | Ctsh        |
| 0.00292845147851381 | -1.03              | 1.00 | 4 | Adcy7       |
| 0.00292897467448615 | -0.358350217641884 | 1.00 | 4 | Hivep2      |
| 0.00293588839022681 | 0.38               | 1.00 | 4 | Zcchc14     |
| 0.00294100183750689 | -0.791388481173129 | 1.00 | 4 | Col4a3      |
| 0.00294987441488182 | -1.06              | 1.00 | 4 | 5031426D15I |
| 0.00299368575016378 | 1.30               | 1.00 | 4 | 2310035C23I |
| 0.00300114346751092 | 0.382375948214047  | 1.00 | 4 | Snx17       |
| 0.00300122979791172 | -0.835001918120372 | 1.00 | 4 | Steap3      |
| 0.00301257578700807 | 1.20               | 1.00 | 4 | Ier5l       |
| 0.00302202299334991 | 0.346937768660874  | 1.00 | 4 | Man2c1      |
| 0.00302964439462712 | 0.379793288031535  | 1.00 | 4 | Deb1        |
| 0.00304938226120181 | 0.442396400849369  | 1.00 | 4 | B3galnt2    |
| 0.00314888994479481 | -0.615079224347909 | 1.00 | 4 | Tnfrsf1a    |
| 0.00315546563312137 | 0.601266064570725  | 1.00 | 4 | Atp1b2      |
| 0.00319131744338452 | -1.05              | 1.00 | 4 | Ifit3       |
| 0.0032106432824661  | -1.01              | 1.00 | 4 | Prickle1    |
| 0.00321232464390976 | -1.15              | 1.00 | 4 | Epha7       |
| 0.00326535096649446 | 0.76               | 1.00 | 4 | Ppp2r5a     |
| 0.0033282296687909  | 0.390136890016964  | 1.00 | 4 | Arl6ip5     |
| 0.00334495719475853 | -1.04              | 1.00 | 4 | Kcnj8       |
| 0.00339469154638773 | 0.63               | 1.00 | 4 | Trappc12    |
| 0.00355125054294182 | -0.83              | 1.00 | 4 | Man2b1      |
| 0.00355216568105134 | -0.876938131686571 | 1.00 | 4 | Tsc22d3     |
| 0.00357467468447832 | -1.38              | 1.00 | 4 | Gfra2       |
| 0.00358725771716273 | -1.16              | 1.00 | 4 | Psd3        |
| 0.00359327252699673 | 0.324354176969048  | 1.00 | 4 | Gjc1        |
| 0.00364585951852795 | 0.754741057676547  | 1.00 | 4 | 5430417L22F |
| 0.00369777592183949 | -1.08              | 1.00 | 4 | Tmem9b      |
| 0.00369838421420916 | -1.39              | 1.00 | 4 | Penk        |
| 0.00370954556168636 | -1.43              | 1.00 | 4 | Al607873    |
| 0.00374363404016115 | 0.295035402049728  | 1.00 | 4 | Rras        |
| 0.00379337551158991 | -1.29              | 1.00 | 4 | Shisa3      |
| 0.00379499978640907 | -0.486215120630727 | 1.00 | 4 | Tceb1       |
| 0.00380116885362658 | 0.464898416739376  | 1.00 | 4 | Ncoa6       |
| 0.00380333784753061 | 0.354161424780976  | 1.00 | 4 | Dek         |
| 0.0038161212373865  | 0.709420355172064  | 1.00 | 4 | Tspyl1      |
| 0.00381894581824661 | -0.533072238116852 | 1.00 | 4 | Fosl2       |
| 0.00395708704099134 | 0.387150766031004  | 1.00 | 4 | Uhrf1bp1l   |
| 0.00399956762902981 | 1.27               | 1.00 | 4 | Klhdc3      |
| 0.00400893023628992 | 0.481350965649811  | 1.00 | 4 | Tom1l2      |
| 0.00403690870518463 | 0.295419249610771  | 1.00 | 4 | Ifngr1      |
| 0.00405025364498041 | -0.614370270326295 | 1.00 | 4 | Lcn2        |
| 0.00406594675910825 | -0.265741617288857 | 1.00 | 4 | Rpl37a      |
| 0.00408869066006344 | -0.636006997363156 | 1.00 | 4 | Scand1      |
| 0.00413213577950815 | -0.677636136848656 | 1.00 | 4 | Anapc13     |
| 0.00414195128665952 | 0.369027135975851  | 1.00 | 4 | Vim         |
| 0.00421383179954882 | -1.14              | 1.00 | 4 | Glb1        |
| 0.00422348302023371 | -0.924392378071323 | 1.00 | 4 | Pmm1        |
| 0.00436578374149975 | -0.956507730389018 | 1.00 | 4 | Trps1       |
| 0.0044211058156843  | 0.361910855329336  | 1.00 | 4 | Cyld        |
| 0.0044261534223637  | -0.632951821580267 | 1.00 | 4 | Atraid      |

|                     |                    |      |   |             |
|---------------------|--------------------|------|---|-------------|
| 0.00443561908622447 | 0.417974208477405  | 1.00 | 4 | 1110008P14F |
| 0.00450194767129649 | -0.258048849277348 | 1.00 | 4 | Scara3      |
| 0.00452681929004959 | -1.45              | 1.00 | 4 | Gpr39       |
| 0.00457433215823948 | -0.88              | 1.00 | 4 | Lifr        |
| 0.00465952940514591 | -0.668548333958272 | 1.00 | 4 | Lipa        |
| 0.00467236718340617 | -0.925602405408128 | 1.00 | 4 | Ptp4a1      |
| 0.00467605674499723 | 1.05               | 1.00 | 4 | Tspan9      |
| 0.00469842967392776 | 0.271622431434436  | 1.00 | 4 | Gpr107      |
| 0.00478311598267841 | -0.380194343192788 | 1.00 | 4 | Manf        |
| 0.00478454578344127 | 0.736429167112979  | 1.00 | 4 | Stbd1       |
| 0.00479906024756175 | 0.38               | 1.00 | 4 | Cyhr1       |
| 0.00487752361184612 | 0.345956563730263  | 1.00 | 4 | Agtpbp1     |
| 0.0049117820611651  | -1.16              | 1.00 | 4 | Rab43       |
| 0.00491468243610285 | -0.820572851196315 | 1.00 | 4 | Nr2f2       |
| 0.00500462609842632 | 0.596926651508814  | 1.00 | 4 | Thoc6       |
| 0.00500862797898616 | 0.81               | 1.00 | 4 | Ifngr2      |
| 0.00507032145689696 | 0.260309193201445  | 1.00 | 4 | Col4a1      |
| 0.00513605447251966 | -0.251125540440833 | 1.00 | 4 | Comt        |
| 0.00514245835143823 | 0.551672360248202  | 1.00 | 4 | Rabgap1     |
| 0.00516414409673549 | 0.320621498225681  | 1.00 | 4 | Kansl1      |
| 0.00520240741245595 | 0.714584737275147  | 1.00 | 4 | Rrp1        |
| 0.00521527589637339 | 0.285756161991626  | 1.00 | 4 | Ola1        |
| 0.00521563503906367 | 0.640018190199434  | 1.00 | 4 | Ano10       |
| 0.00526054812272761 | -0.532839209959722 | 1.00 | 4 | Tnfsf12     |
| 0.00527279912296571 | 0.377874908351087  | 1.00 | 4 | Bmpr1a      |
| 0.00534062749492915 | 0.348676662701797  | 1.00 | 4 | Bbx         |
| 0.00534195881522697 | 0.46               | 1.00 | 4 | Large       |
| 0.00535900884632799 | 1.06               | 1.00 | 4 | Lmf2        |
| 0.00537006191793184 | -0.416028815099571 | 1.00 | 4 | Fbn1        |
| 0.00538311358039442 | -1.24              | 1.00 | 4 | Runx1       |
| 0.00540107219692746 | 0.562320218246417  | 1.00 | 4 | Cd200       |
| 0.00548901638961558 | -1.43              | 1.00 | 4 | Sult5a1     |
| 0.00551305235773896 | -0.307972767099181 | 1.00 | 4 | Gm12060     |
| 0.0055228492035203  | -1.21              | 1.00 | 4 | Psmb8       |
| 0.00553998475461064 | -0.300949615560501 | 1.00 | 4 | Ier3        |
| 0.00559792102185082 | -1.08              | 1.00 | 4 | Arl5b       |
| 0.00563899528943216 | -0.47              | 1.00 | 4 | Atp6v1g1    |
| 0.00565372749665921 | 0.383130982183842  | 1.00 | 4 | Nsmf        |
| 0.00574410165583395 | -1.39              | 1.00 | 4 | Bmper       |
| 0.00577273201151819 | 0.424749932234175  | 1.00 | 4 | Slc6a8      |
| 0.00581848406999882 | -0.936612028519224 | 1.00 | 4 | Nop16       |
| 0.00582590240839138 | -0.591201189371619 | 1.00 | 4 | Tmod3       |
| 0.0058335687526492  | -0.73              | 1.00 | 4 | Pcsk6       |
| 0.00593176411779494 | 0.268094939176476  | 1.00 | 4 | Ddx47       |
| 0.00593628385449147 | -0.902031100570395 | 1.00 | 4 | Pikfyve     |
| 0.00593962015541247 | -1.46              | 1.00 | 4 | Ccl11       |
| 0.00604336547450977 | 0.269567328277122  | 1.00 | 4 | Camsap1     |
| 0.00606838776236792 | 0.499910485321838  | 1.00 | 4 | Akap9       |
| 0.00610541005222788 | -1.11              | 1.00 | 4 | Cilp        |
| 0.00612100733744203 | 0.80               | 1.00 | 4 | Mrpl50      |
| 0.00613645359835919 | -1.00              | 1.00 | 4 | Meis2       |
| 0.00614321567049284 | 0.975141875799995  | 1.00 | 4 | 2210407C18I |
| 0.00615072003256369 | 0.624477951127709  | 1.00 | 4 | Xrcc5       |
| 0.00618517425113064 | -0.441247287089573 | 1.00 | 4 | Dap         |
| 0.00626977670859391 | -0.395637235160244 | 1.00 | 4 | Tmed5       |
| 0.00628496263781494 | 0.634097250161599  | 1.00 | 4 | Mcm3ap      |

|                     |                    |      |   |             |
|---------------------|--------------------|------|---|-------------|
| 0.00633582909529083 | -1.00              | 1.00 | 4 | Mecom       |
| 0.00634711645329504 | -0.925183851740528 | 1.00 | 4 | Nin         |
| 0.00638806172795615 | -0.842889872279868 | 1.00 | 4 | Ncstn       |
| 0.0064050170644753  | -1.15              | 1.00 | 4 | Tsta3       |
| 0.00641077777467877 | 0.36               | 1.00 | 4 | Ezh1        |
| 0.00647238957905377 | -0.390804201060765 | 1.00 | 4 | Hsbp1       |
| 0.00654439020152501 | 0.416731261849763  | 1.00 | 4 | Sertad4     |
| 0.00655612158943509 | -0.778280678702123 | 1.00 | 4 | Smarcd2     |
| 0.00658793265290894 | 0.573311190851034  | 1.00 | 4 | Mak16       |
| 0.00658996625695004 | -0.848363652658617 | 1.00 | 4 | Bin3        |
| 0.00663820339438507 | 0.273094797069281  | 1.00 | 4 | Sepw1       |
| 0.00665261502341763 | 0.292496444203505  | 1.00 | 4 | 0610011F06F |
| 0.00674399437312443 | 1.11               | 1.00 | 4 | Wfdc1       |
| 0.00677457469614957 | -0.287410775651419 | 1.00 | 4 | Rps7        |
| 0.00678471152646206 | -0.465683488574723 | 1.00 | 4 | Socs2       |
| 0.00687476283628637 | 0.423080577841726  | 1.00 | 4 | Stip1       |
| 0.00691497563491843 | 0.669054255344216  | 1.00 | 4 | Senp7       |
| 0.00692848698128984 | -1.19              | 1.00 | 4 | Tenm3       |
| 0.00695243702267588 | -1.18              | 1.00 | 4 | Mmp19       |
| 0.0069597818518769  | -0.697990642718385 | 1.00 | 4 | Itpr2       |
| 0.00696386267370573 | 0.738792399116364  | 1.00 | 4 | Rab3a       |
| 0.00697219802399855 | 0.738876983855328  | 1.00 | 4 | Ggta1       |
| 0.00698999315651298 | -1.11              | 1.00 | 4 | Cxcl16      |
| 0.00704142768797111 | -1.06              | 1.00 | 4 | Col8a1      |
| 0.00704700477461018 | 0.621365391658709  | 1.00 | 4 | Oxsr1       |
| 0.00711308608476888 | -0.840133224862459 | 1.00 | 4 | Rbms1       |
| 0.00711420502992747 | 0.523294597167388  | 1.00 | 4 | Sema3c      |
| 0.007118842028847   | -0.669717631677736 | 1.00 | 4 | Adipor1     |
| 0.00712195688469519 | -0.521837305345246 | 1.00 | 4 | Kcne4       |
| 0.00718648040529854 | 0.31               | 1.00 | 4 | St3gal2     |
| 0.00721583610878852 | 0.368702307060209  | 1.00 | 4 | Itgb5       |
| 0.00725526426480391 | 0.446266329358276  | 1.00 | 4 | Zfand3      |
| 0.00733228514585653 | -0.573679420306053 | 1.00 | 4 | Nlgn2       |
| 0.00735403069076289 | -1.18              | 1.00 | 4 | Olfml1      |
| 0.00737097014554418 | -0.47              | 1.00 | 4 | Acvrl1      |
| 0.00737202430642289 | -0.646669706349771 | 1.00 | 4 | Trip12      |
| 0.00737993750816181 | -0.561289568374773 | 1.00 | 4 | Kdm6b       |
| 0.00741779348945431 | -0.415483967129736 | 1.00 | 4 | Trim8       |
| 0.0074420402330688  | -0.639072912644401 | 1.00 | 4 | C1qtnf1     |
| 0.00745528071279114 | -1.08              | 1.00 | 4 | Rgs10       |
| 0.00745550406191516 | -0.305862783821068 | 1.00 | 4 | Wnk1        |
| 0.00765377351408786 | 0.490224158586941  | 1.00 | 4 | Setd3       |
| 0.00771873919254945 | -0.476347908144884 | 1.00 | 4 | Mrpl33      |
| 0.00771980963746069 | 0.559720363098917  | 1.00 | 4 | Wdr6        |
| 0.00772313375337402 | 1.55               | 1.00 | 4 | Cdkn2aip    |
| 0.00772813305789483 | 0.619073144481972  | 1.00 | 4 | Cacna1c     |
| 0.00776894190697166 | -0.482990513581446 | 1.00 | 4 | Ppic        |
| 0.00781094115206817 | 0.714667138458053  | 1.00 | 4 | Srf         |
| 0.00787834217043466 | 0.269135142083224  | 1.00 | 4 | Zfand6      |
| 0.00788167525926567 | 0.625783588775341  | 1.00 | 4 | Nr1d1       |
| 0.00791353169296566 | -0.490735595848603 | 1.00 | 4 | Btg2        |
| 0.00793050883435035 | -0.330408390582899 | 1.00 | 4 | Sat1        |
| 0.00793447212441755 | 0.510095089744242  | 1.00 | 4 | Nrep        |
| 0.0079777000124913  | -0.672691608602193 | 1.00 | 4 | Pmp         |
| 0.00798139318425136 | 0.616225014266267  | 1.00 | 4 | Zfp651      |
| 0.00800541922156242 | -1.23              | 1.00 | 4 | Glt8d2      |

|                     |                    |      |   |          |
|---------------------|--------------------|------|---|----------|
| 0.00801515623274856 | 0.446657404428614  | 1.00 | 4 | Zadh2    |
| 0.00807831642829553 | 1.32               | 1.00 | 4 | Arhgap35 |
| 0.00808778459999003 | 0.451848846577191  | 1.00 | 4 | Nptn     |
| 0.00821392127494908 | -1.54              | 1.00 | 4 | S1pr2    |
| 0.00822774750546314 | -0.887712025750669 | 1.00 | 4 | Slc25a51 |
| 0.00825177998732625 | -0.365137992675382 | 1.00 | 4 | Ssr1     |
| 0.00827933326975552 | 0.567801142273462  | 1.00 | 4 | Peli2    |
| 0.00828065449857898 | 1.18               | 1.00 | 4 | Lemd2    |
| 0.00828719523749337 | -1.23              | 1.00 | 4 | Pcdh18   |
| 0.00832162344600992 | -0.30              | 1.00 | 4 | Cd93     |
| 0.00837750505741281 | 0.536341609020855  | 1.00 | 4 | Trak1    |
| 0.00845127790877439 | -0.277980223045321 | 1.00 | 4 | Pbx1     |
| 0.00850892421275142 | 0.25               | 1.00 | 4 | Taf3     |
| 0.00858896529684868 | 0.712050375844552  | 1.00 | 4 | Bcl2l11  |
| 0.00865953151730529 | 0.440513215508823  | 1.00 | 4 | Acadslb  |
| 0.00868071392763843 | -0.344825399580859 | 1.00 | 4 | Flt3l    |
| 0.00878477099152619 | -0.460989738912679 | 1.00 | 4 | Prr13    |
| 0.00884065128454337 | -0.321181908221284 | 1.00 | 4 | BC048507 |
| 0.00886824646270059 | 0.792353584189829  | 1.00 | 4 | Dhrs1    |
| 0.00887909745679617 | -0.973493693112543 | 1.00 | 4 | Taf10    |
| 0.00889635071544083 | 0.476782274378687  | 1.00 | 4 | Ralgapa2 |
| 0.00891864104685959 | 0.499546554755772  | 1.00 | 4 | Armc1    |
| 0.00893092465791068 | -0.53              | 1.00 | 4 | Pdgfrb   |
| 0.00899941077161461 | -0.559221649240264 | 1.00 | 4 | Slc9a6   |
| 0.00901320341421773 | -0.957423553117724 | 1.00 | 4 | Spry1    |
| 0.0090428662883885  | -0.730976422769389 | 1.00 | 4 | B4gal5   |
| 0.00908638701105711 | -0.266707390910781 | 1.00 | 4 | Uqcrb    |
| 0.00908736203553602 | -0.37              | 1.00 | 4 | Rpl29    |
| 0.00920944497090594 | 0.265799233672326  | 1.00 | 4 | Cdadcl   |
| 0.0092619037496328  | -1.34              | 1.00 | 4 | Fam43a   |
| 0.00927278349086753 | 0.320465948600301  | 1.00 | 4 | Dst      |
| 0.0092732704506889  | -0.301494965508861 | 1.00 | 4 | Nadk     |
| 0.00928322634760817 | 0.29               | 1.00 | 4 | Scmh1    |
| 0.00930627450615091 | -0.511749644160183 | 1.00 | 4 | Ostc     |
| 0.00935760167795579 | 0.31               | 1.00 | 4 | Ypel3    |
| 0.00936513357816392 | 0.288526039145099  | 1.00 | 4 | Fam168a  |
| 0.00936555164242282 | -0.849252895223007 | 1.00 | 4 | Dpp9     |
| 0.00937749117634814 | -1.24              | 1.00 | 4 | Fyn      |
| 0.00941105868170973 | -0.645120686785367 | 1.00 | 4 | Sh3d19   |
| 0.00942980141277212 | 0.684618147254383  | 1.00 | 4 | Traf5    |
| 0.00947043252267258 | 0.259838180051511  | 1.00 | 4 | Stk24    |
| 0.00962197936893925 | -0.401056762912491 | 1.00 | 4 | Daam1    |
| 0.0096222599420694  | -1.10              | 1.00 | 4 | Amy1     |
| 0.00972252236958324 | 0.491861511214802  | 1.00 | 4 | Kpna6    |
| 0.00977090224657269 | -1.55              | 1.00 | 4 | Tspan11  |
| 0.00982682293495174 | 0.452326447977725  | 1.00 | 4 | Cript    |
| 0.00983417512916549 | -0.77              | 1.00 | 4 | Ptpdc1   |
| 0.00985116860166596 | 0.773561102276385  | 1.00 | 4 | Cdk10    |
| 0.00987889503923835 | 0.372995713905729  | 1.00 | 4 | Wdr1     |



| p_val                | avg_logFC          | p_val_adj            | cluster | gene     |
|----------------------|--------------------|----------------------|---------|----------|
| 3.02079169957185e-26 | 1.378030376        | 4.17201541627869e-22 | 5       | Gfpt2    |
| 1.11757573555314e-24 | 0.970703554235397  | 1.54348384837245e-20 | 5       | C3       |
| 2.15426562349249e-24 | 1.070284821        | 2.97525625260548e-20 | 5       | C1s1     |
| 9.54821268114821e-23 | 1.185744082        | 1.31870365339338e-18 | 5       | Mnda     |
| 9.65416705289982e-23 | 1.749243134        | 1.33333701167599e-18 | 5       | Gpr133   |
| 1.43172630582678e-22 | 1.798123695        | 1.97735720097736e-18 | 5       | Ccl7     |
| 4.0554672899961e-22  | 0.726797242134409  | 5.60100587421362e-18 | 5       | Serping1 |
| 4.53444944104453e-22 | 1.330405008        | 6.26252812302661e-18 | 5       | Tnfaip6  |
| 2.30468742258449e-21 | 0.962327714479351  | 3.18300379933144e-17 | 5       | C1ra     |
| 6.16425758394968e-21 | 0.903677787030323  | 8.5134561491929e-17  | 5       | Mt2      |
| 1.7729757321161e-20  | 0.754056614        | 2.44865678362554e-16 | 5       | Igfbp4   |
| 1.33960353271774e-19 | 0.676371002357964  | 1.85012643903647e-15 | 5       | Mt1      |
| 2.55837011478704e-19 | 1.082432015        | 3.53336496553238e-15 | 5       | Clec3b   |
| 4.64483553825342e-19 | 1.14152448         | 6.4149823618818e-15  | 5       | Cxcl1    |
| 1.403484589334E-18   | 1.036474467        | 1.93835256632918e-14 | 5       | Scn7a    |
| 2.09210622905356e-18 | 0.700162420225252  | 2.88940791294587e-14 | 5       | Gsn      |
| 5.20748338923433e-18 | 1.514603257        | 7.19205530887153e-14 | 5       | Emilin2  |
| 1.03603078629061e-17 | 1.727316143        | 1.43086211894596e-13 | 5       | Al607873 |
| 2.5407321494992e-17  | 1.571620036        | 3.50900517167334e-13 | 5       | Ifi204   |
| 2.58854641239782e-17 | -1.118896751       | 3.57504145016263e-13 | 5       | Cpe      |
| 4.66810418414265e-17 | 0.615275166683644  | 6.44711868871941e-13 | 5       | Rarres2  |
| 6.09852170518294e-17 | 1.015733442        | 8.42266832702815e-13 | 5       | Cfb      |
| 6.88964671892308e-17 | 2.050756427        | 9.51529108350467e-13 | 5       | Ptx3     |
| 1.07110875964424e-16 | 2.027006974        | 1.47930830794466e-12 | 5       | Ccl11    |
| 1.58576607470866e-16 | 1.151626433        | 2.19010152578013e-12 | 5       | Srpx     |
| 1.73499289517602e-16 | 0.689413470969424  | 2.3961986875276e-12  | 5       | Pcolce   |
| 3.11474512176008e-16 | 1.109055265        | 4.30177448766284e-12 | 5       | Phlda1   |
| 4.90164287112662e-16 | 1.698631218        | 6.76965896931297e-12 | 5       | Has1     |
| 1.13958448276245e-15 | 1.045810153        | 1.57388012914322e-11 | 5       | Scara5   |
| 2.48337256017602e-15 | -1.08419663        | 3.4297858428591e-11  | 5       | Tm4sf1   |
| 2.55979054147827e-15 | 1.139147573        | 3.53532671683564e-11 | 5       | Hk2      |
| 3.29117542791942e-15 | 1.849478751        | 4.54544238349951e-11 | 5       | Lrm4cl   |
| 4.47458149983146e-15 | -1.482024814       | 6.17984450941723e-11 | 5       | Acta2    |
| 5.77619569076079e-15 | 0.643149464263268  | 7.97750386850973e-11 | 5       | Ly6a     |
| 6.984730288313E-15   | 1.558711494        | 9.64661100118909e-11 | 5       | Ifi205   |
| 7.2390782301414e-15  | 1.733551357        | 9.99789094364829e-11 | 5       | Opcml    |
| 7.30407573295344e-15 | 1.782823609        | 1.0087658994782e-10  | 5       | Ccl2     |
| 8.6299013964636e-15  | 1.043429861        | 1.19187568186559e-10 | 5       | Fndc1    |
| 1.05435832051376e-14 | 0.694514172106746  | 1.45617427646155e-10 | 5       | Dpt      |
| 1.07008797261138e-14 | 1.367555006        | 1.47789849897357e-10 | 5       | Cd248    |
| 1.0771500364126e-14  | 1.094944917        | 1.48765191528944e-10 | 5       | Pi16     |
| 1.54652512814865e-14 | 0.865436869441051  | 2.13590585448611e-10 | 5       | Dpep1    |
| 2.33160486417271e-14 | -1.390868154       | 3.22017947790893e-10 | 5       | Fblim1   |
| 2.53950129092433e-14 | 0.744379719760503  | 3.5073052328956e-10  | 5       | Col14a1  |
| 3.64860175803918e-14 | 0.960030957744028  | 5.03908388802791e-10 | 5       | Gpx3     |
| 7.45476806364543e-14 | -1.127654307       | 1.02957801727007e-09 | 5       | Clu      |
| 1.32434486834627e-13 | 0.438785521159299  | 1.82905269767303e-09 | 5       | Col1a2   |
| 1.40623255441356e-13 | 0.441806003        | 1.94214778090057e-09 | 5       | Ifitm3   |
| 2.10227417071873e-13 | 0.906211526036038  | 2.90345085717964e-09 | 5       | Ly6c1    |
| 2.81097487789736e-13 | 0.867502632390151  | 3.88223740386404e-09 | 5       | Nid1     |
| 2.92075546763392e-13 | 0.603048155559082  | 4.03385537634921e-09 | 5       | Rnase4   |
| 5.28580768149408e-13 | -2.308333141       | 7.30022898891147e-09 | 5       | Cnn1     |
| 6.74593269523634e-13 | 1.323359793        | 9.31680764539091e-09 | 5       | Il6      |
| 1.14577010397692e-12 | -0.997585664566546 | 1.58242309060253e-08 | 5       | Eln      |
| 1.16167162090516e-12 | 0.407065942879309  | 1.60438467563212e-08 | 5       | Timp2    |

|                      |                    |                      |   |          |
|----------------------|--------------------|----------------------|---|----------|
| 1.28253766117982e-12 | 1.202027062        | 1.77131276385544e-08 | 5 | Pcsk6    |
| 2.24309316432026e-12 | 0.922489637        | 3.09793596924272e-08 | 5 | Csf1     |
| 5.37800004463093e-12 | -1.196126764       | 7.42755586163978e-08 | 5 | Mylk     |
| 7.05749198109813e-12 | 0.754794901818484  | 9.74710217509463e-08 | 5 | Cxcl12   |
| 8.0623617257286e-12  | 1.037616121        | 1.11349277794038e-07 | 5 | C2       |
| 8.13213559756674e-12 | 0.489427926        | 1.12312924737994e-07 | 5 | Dcn      |
| 1.6346180906175e-11  | -1.789477035       | 2.25757104495182e-07 | 5 | Lmod1    |
| 1.66047979500943e-11 | -0.756260759272131 | 2.29328864488752e-07 | 5 | Aplp2    |
| 1.67415277512373e-11 | 0.636981992742783  | 2.31217239772339e-07 | 5 | Cygb     |
| 1.74975561532251e-11 | 0.998608128457524  | 2.41658748032192e-07 | 5 | Dapk1    |
| 1.82092548515548e-11 | 0.680908358862279  | 2.51488018754824e-07 | 5 | Ppap2b   |
| 1.90243534924848e-11 | 0.591787029184591  | 2.62745346084707e-07 | 5 | Serpinf1 |
| 2.76705203302215e-11 | 0.597832874230967  | 3.8215755628069e-07  | 5 | Htra3    |
| 2.82069649438458e-11 | 0.522448995599132  | 3.89566392839454e-07 | 5 | Ecm1     |
| 4.00944928750033e-11 | -1.331582333       | 5.5374504109667e-07  | 5 | Ccdc3    |
| 4.21196627722398e-11 | -0.840072711568992 | 5.81714662547404e-07 | 5 | Ctgf     |
| 4.63835281484878e-11 | 1.012148556        | 6.40602907258765e-07 | 5 | Igfbp6   |
| 4.74081185125888e-11 | -1.630522062       | 6.54753524777364e-07 | 5 | Cdc42ep3 |
| 5.14490990530887e-11 | 1.475200469        | 7.10563507022208e-07 | 5 | Apod     |
| 5.80574845987075e-11 | 1.097631425        | 8.01831919792749e-07 | 5 | Ugdh     |
| 6.55782869981018e-11 | -1.498839559       | 9.05701721730784e-07 | 5 | Myl9     |
| 7.39043239520648e-11 | 0.771589845266108  | 1.02069261810197e-06 | 5 | C4b      |
| 7.55405986232451e-11 | 1.245923763        | 1.04329120758564e-06 | 5 | Gpc3     |
| 7.96544951328269e-11 | 1.613641274        | 1.10010823227947e-06 | 5 | Plac8    |
| 8.61158818713868e-11 | 0.638153688142304  | 1.18934644452572e-06 | 5 | Add3     |
| 1.08426452460554e-10 | 0.531679772813055  | 1.49747773493272e-06 | 5 | Ccnl1    |
| 1.18997969147931e-10 | 1.061901507        | 1.64348095190207e-06 | 5 | Steap4   |
| 1.42424033780184e-10 | 0.549429021904142  | 1.96701833053812e-06 | 5 | Lrp1     |
| 1.59609168313435e-10 | 0.916888811953616  | 2.20436222357685e-06 | 5 | Igfbp5   |
| 1.68736935453444e-10 | 0.482811756280073  | 2.33042581554752e-06 | 5 | Ctsl     |
| 1.70542637674749e-10 | 0.548562794164874  | 2.35536436892596e-06 | 5 | Fbln1    |
| 1.8988222858688e-10  | 0.797334054348088  | 2.6224634590134e-06  | 5 | C7       |
| 2.06513625703001e-10 | -1.203373071       | 2.85215968458414e-06 | 5 | Pkp4     |
| 2.12304870800173e-10 | 0.381320993840951  | 2.93214257062118e-06 | 5 | Ftl1     |
| 2.39833803986641e-10 | 0.599763295339628  | 3.3123446668595e-06  | 5 | Entpd2   |
| 2.53833415320018e-10 | 0.925120085534022  | 3.50569329898476e-06 | 5 | Efemp1   |
| 2.73038256536369e-10 | 0.550447049077221  | 3.77093136102379e-06 | 5 | Abca8a   |
| 2.7541664776584e-10  | 1.143632147        | 3.80377932229401e-06 | 5 | Inmt     |
| 2.8072716055377e-10  | 0.726570895465319  | 3.87712281440812e-06 | 5 | Kdm6b    |
| 3.1606588844949e-10  | 0.673743823610887  | 4.36518598537591e-06 | 5 | Anxa1    |
| 4.4136971496535e-10  | -1.313363739       | 6.09575713338645e-06 | 5 | Itga8    |
| 4.63354876749455e-10 | 1.343975594        | 6.39939420278672e-06 | 5 | Lgi2     |
| 5.58244837078973e-10 | -0.543933567677639 | 7.70991944489769e-06 | 5 | Lmcd1    |
| 6.00036700134902e-10 | -1.463302441       | 8.28710686556313e-06 | 5 | Wwp2     |
| 6.46891649736773e-10 | 0.884174474605224  | 8.93422057451457e-06 | 5 | Bcl3     |
| 7.69473810025521e-10 | 0.732583468185215  | 1.06272027902625e-05 | 5 | Marcks   |
| 9.57808656855889e-10 | -1.436147396       | 1.32282953598367e-05 | 5 | Tagln    |
| 1.14228369504848e-09 | -0.640594144439173 | 1.57760801123146e-05 | 5 | Cd200    |
| 1.20224997390348e-09 | 0.604453366402215  | 1.6604274389581e-05  | 5 | Smoc2    |
| 1.31079430017278e-09 | 1.165716093        | 1.81033800796863e-05 | 5 | Slc4a4   |
| 1.45368278944804e-09 | 0.726351957728122  | 2.00768130050668e-05 | 5 | Cpxm1    |
| 1.48381482637107e-09 | 0.572890960426067  | 2.04929665670109e-05 | 5 | Cebpd    |
| 1.51141840955207e-09 | 0.568328961625748  | 2.08741996543237e-05 | 5 | Pdgfra   |
| 1.70209656229259e-09 | 1.054458193        | 2.35076556218229e-05 | 5 | Myc      |
| 1.75879473421085e-09 | 1.156749547        | 2.4290714074186e-05  | 5 | Tnxb     |
| 2.1134509605286e-09  | 1.019911842        | 2.91888712158605e-05 | 5 | Akap12   |

|                      |                    |                      |   |          |
|----------------------|--------------------|----------------------|---|----------|
| 2.61520843123143e-09 | 0.869696049        | 3.61186436437373e-05 | 5 | Ptgs2    |
| 2.90339036810501e-09 | 1.217758184        | 4.00987243738983e-05 | 5 | Cxcl2    |
| 3.48128457722536e-09 | -0.816139260564755 | 4.80800212960595e-05 | 5 | Actn4    |
| 3.9313326285636e-09  | -0.892174248       | 5.42956349330918e-05 | 5 | Pls3     |
| 4.16123808972472e-09 | 0.643635062160869  | 5.74708592571881e-05 | 5 | Bicc1    |
| 4.50510001476437e-09 | -1.219793444       | 6.22199363039108e-05 | 5 | Pgm5     |
| 4.68728351512443e-09 | 1.175326378        | 6.47360726273835e-05 | 5 | Metnl    |
| 6.5891078877696e-09  | 0.501550953200101  | 9.1002169037986e-05  | 5 | S100a10  |
| 6.95394667462712e-09 | 1.575667323        | 9.60409575232751e-05 | 5 | Amy1     |
| 7.21989567341329e-09 | 0.493301250584481  | 9.97139791455109e-05 | 5 | Mfap5    |
| 7.54946640768292e-09 | 0.828568870309903  | 0.000104265680556509 | 5 | Slit3    |
| 9.59446054187719e-09 | 1.176189501        | 0.000132509094543866 | 5 | Arhgap24 |
| 9.87781577889906e-09 | 0.312934735033868  | 0.000136422513722375 | 5 | Hspa5    |
| 1.14520725643801e-08 | 0.373748633        | 0.000158164574186654 | 5 | Nfkbia   |
| 1.15323633650272e-08 | 0.898988734792969  | 0.00015927347043439  | 5 | Ces2g    |
| 1.16622783107407e-08 | 0.519358252707745  | 0.00016106772574964  | 5 | Ebf1     |
| 1.23183366223947e-08 | 0.701829022212397  | 0.000170128547091893 | 5 | Slfn5    |
| 1.45419321808071e-08 | -1.546337722       | 0.000200838625349127 | 5 | Ncam1    |
| 1.46670120095915e-08 | 0.421871831549179  | 0.000202566102864469 | 5 | Slc43a3  |
| 1.57340349741816e-08 | 0.865445346045046  | 0.000217302757028422 | 5 | Pim1     |
| 1.67859379317581e-08 | 0.965387980970251  | 0.000231830588775512 | 5 | Ildr2    |
| 1.71964516797567e-08 | 1.203582492        | 0.00023750019414912  | 5 | Adm      |
| 1.99101902854533e-08 | -1.64619931        | 0.000274979638032396 | 5 | Tpm2     |
| 2.10094907448356e-08 | 0.681884483422782  | 0.000290162076676924 | 5 | Steap3   |
| 2.12602480778606e-08 | -1.076780538       | 0.000293625286203333 | 5 | Smoc1    |
| 2.24795208214158e-08 | 0.448804145793231  | 0.000310464662064573 | 5 | Fosl2    |
| 2.38258650791266e-08 | -1.138685371       | 0.000329059022607818 | 5 | Mcam     |
| 2.49467595732531e-08 | -0.965209827181334 | 0.000344539696466198 | 5 | Actn1    |
| 2.52491715067625e-08 | -0.460395020601318 | 0.000348716307679897 | 5 | Itgb1    |
| 3.0240750081855e-08  | -1.171958652       | 0.000417654999380499 | 5 | Susd5    |
| 3.19983168842088e-08 | -1.111243142       | 0.000441928754487808 | 5 | Csrp1    |
| 3.2073422193279e-08  | 0.999148209        | 0.000442966033911376 | 5 | Tnfaip2  |
| 3.93420975127185e-08 | -0.769861223916434 | 0.000543353708748155 | 5 | Dmd      |
| 3.97757021536508e-08 | -0.891734821480162 | 0.000549342222444072 | 5 | Myh11    |
| 3.99787700137618e-08 | 0.877944743321992  | 0.000552146792660064 | 5 | S1pr3    |
| 5.91797265717315e-08 | -0.884367049115752 | 0.000817331203682184 | 5 | Tpm1     |
| 6.13484224654297e-08 | 0.443797014275252  | 0.00084728306267005  | 5 | Cd34     |
| 6.24276445039179e-08 | -1.868600234       | 0.00086218819824361  | 5 | Entpd1   |
| 6.90084652387556e-08 | 0.394269238574745  | 0.000953075913412453 | 5 | Adamts1  |
| 6.99963328310618e-08 | 0.751834362024945  | 0.000966719352729794 | 5 | Apbb1ip  |
| 8.00461594420176e-08 | 0.774556795816792  | 0.00110551750805371  | 5 | Trib1    |
| 9.36475600029964e-08 | 0.548304089234397  | 0.00129336645120138  | 5 | Abcc9    |
| 9.92384407814314e-08 | -1.296464446       | 0.00137058210563235  | 5 | Slmap    |
| 1.14979090710644e-07 | -0.458675385713082 | 0.0015879762218047   | 5 | Fhl1     |
| 1.16959216029917e-07 | 0.749961151448489  | 0.00161532373258919  | 5 | Anpep    |
| 1.17465450360802e-07 | 0.410384378470249  | 0.00162231533493303  | 5 | Atf4     |
| 1.19404743645604e-07 | 0.506384399572509  | 0.00164909891448944  | 5 | Ernf1    |
| 1.21443900078658e-07 | 0.647325783375312  | 0.00167726170398634  | 5 | Maff     |
| 1.29733422838842e-07 | 0.705622643589407  | 0.00179174830282725  | 5 | Lgals3bp |
| 1.41397660021076e-07 | -1.528978078       | 0.00195284308255109  | 5 | Tspan2   |
| 1.44351956977402e-07 | -1.075618055       | 0.0019936448778149   | 5 | Epas1    |
| 1.47014207389576e-07 | 0.830705396188188  | 0.00203041321825743  | 5 | Nfil3    |
| 1.47796872742441e-07 | 0.834852439711112  | 0.00204122260944585  | 5 | Hmox1    |
| 1.50595158971384e-07 | -1.912084036       | 0.00207986974055378  | 5 | Myom1    |
| 1.60429722981173e-07 | 0.615045635        | 0.00221569490409298  | 5 | Mgst1    |
| 1.6447868660406e-07  | 1.023753806        | 0.00227161514068867  | 5 | Lbp      |

|                      |                    |                     |   |           |
|----------------------|--------------------|---------------------|---|-----------|
| 1.67502218169886e-07 | 0.840563380982296  | 0.0023133731351443  | 5 | Egfr      |
| 1.69762594469453e-07 | -1.202003422       | 0.00234459119221761 | 5 | Fam3c     |
| 1.86885045290566e-07 | 0.451881461468406  | 0.00258106936050801 | 5 | Cd302     |
| 1.8911475759335e-07  | 0.798944083071867  | 0.00261186391712176 | 5 | Uap1      |
| 1.92085574749248e-07 | 0.685971420315148  | 0.00265289387286186 | 5 | Cebpb     |
| 2.04777087985398e-07 | -2.153135799       | 0.00282817636216633 | 5 | Cbr2      |
| 2.06448167453629e-07 | -0.745419739485096 | 0.00285125564070207 | 5 | Tns1      |
| 2.50141508202108e-07 | 1.421280371        | 0.00345470436977931 | 5 | Ebf2      |
| 2.5089995279715e-07  | 0.613602677437729  | 0.00346517924808144 | 5 | Gda       |
| 2.54268990312656e-07 | 1.069870479        | 0.00351170902520809 | 5 | Cotl1     |
| 2.61725886342655e-07 | -0.453602488866274 | 0.00361469621627841 | 5 | Vcl       |
| 2.63114394309634e-07 | 0.709882458416357  | 0.00363387289981035 | 5 | Gdf10     |
| 3.07388347822794e-07 | 0.557571813324578  | 0.0042453404717806  | 5 | Fbln2     |
| 3.17417954020977e-07 | 1.075342026        | 0.00438385936298371 | 5 | Wnt11     |
| 3.44732838438206e-07 | 0.375800271273332  | 0.00476110523167006 | 5 | Adamts2   |
| 3.59848224128031e-07 | 0.485875801066442  | 0.00496986382343224 | 5 | Pcolce2   |
| 5.00221551487374e-07 | 0.739506276828756  | 0.00690855984759213 | 5 | Ccbe1     |
| 5.20576983202183e-07 | 0.504324218545076  | 0.00718968871500535 | 5 | Islr      |
| 5.44788566613737e-07 | -1.251992844       | 0.00752407489350232 | 5 | Synpo2    |
| 5.61657718949193e-07 | 0.437502647658319  | 0.00775705475640731 | 5 | Axl       |
| 6.72949071114819e-07 | 0.548273170105425  | 0.00929409962116677 | 5 | Sash1     |
| 6.82587002648667e-07 | -0.416035869120725 | 0.00942720909358074 | 5 | Endod1    |
| 7.04768454948988e-07 | 0.614016524625716  | 0.00973355713130047 | 5 | Map4k4    |
| 7.82328464754051e-07 | 0.458515283593627  | 0.0108047384267182  | 5 | Adamts5   |
| 8.16021942990758e-07 | 0.475531536082324  | 0.0112700790546454  | 5 | Litaf     |
| 8.37181011693689e-07 | 0.318461486        | 0.0115623069525015  | 5 | Aebp1     |
| 9.03118520746832e-07 | 0.796925843298362  | 0.0124729698900345  | 5 | Enpp3     |
| 9.07773884593394e-07 | -0.949249821520739 | 0.0125372651201194  | 5 | Syne1     |
| 9.21734541435999e-07 | 0.843667074592436  | 0.0127300757517726  | 5 | Penk      |
| 1.10893309311765e-06 | 0.539242889282844  | 0.0153154749490479  | 5 | Socs3     |
| 1.16473789377539e-06 | 0.945176246385872  | 0.0160861950509319  | 5 | Baiap2    |
| 1.17062885137266e-06 | 0.533197834725051  | 0.0161675550663078  | 5 | Serpina3n |
| 1.18386172841578e-06 | 0.763804979665725  | 0.0163503143311504  | 5 | Ube2e2    |
| 1.22504479662438e-06 | -1.15569405        | 0.0169190936861793  | 5 | Hbegf     |
| 1.23076021897847e-06 | -1.255370405       | 0.0169980293843117  | 5 | Cspg4     |
| 1.25273123006712e-06 | 0.723624852081541  | 0.017301471018457   | 5 | Ackr3     |
| 1.28645248441384e-06 | -0.829800992839495 | 0.0177671952622395  | 5 | Kank1     |
| 1.29887799172242e-06 | 0.378486325937322  | 0.0179388039436784  | 5 | Il33      |
| 1.44666707912058e-06 | -2.030598028       | 0.0199799190297343  | 5 | Fbxo32    |
| 1.49039073264218e-06 | 0.530862812247737  | 0.0205837864085212  | 5 | Ddah2     |
| 1.49835173878112e-06 | 0.451542373133932  | 0.020693735864306   | 5 | Zfp36     |
| 1.51445270191182e-06 | 0.571235650017599  | 0.0209161062661042  | 5 | Tgfr3     |
| 1.53849601830279e-06 | 0.4322465          | 0.0212481685087798  | 5 | Col3a1    |
| 1.55262406735699e-06 | -1.884685604       | 0.0214432909942673  | 5 | Pcp4l1    |
| 1.64879721472216e-06 | -1.30379961        | 0.0227715383325278  | 5 | Nov       |
| 1.66212759546209e-06 | 0.609153629843274  | 0.0229556442209269  | 5 | Tgif1     |
| 1.68099209156594e-06 | 0.349265459294059  | 0.0232161817766172  | 5 | Celf2     |
| 1.90621393279666e-06 | -1.920533975       | 0.0263267206258547  | 5 | Npnt      |
| 1.95536213500993e-06 | 0.480333788        | 0.0270055064466222  | 5 | Rbms1     |
| 1.97392693518481e-06 | 0.386538611        | 0.0272619049018374  | 5 | Mmp2      |
| 2.01432529330076e-06 | 0.749604632        | 0.0278198466257768  | 5 | Ripk1     |
| 2.024202505267E-06   | 0.405848786098348  | 0.0279562608002426  | 5 | Npc2      |
| 2.05836739757501e-06 | 0.508109530302714  | 0.0284281121279084  | 5 | Olfml3    |
| 2.11505234901542e-06 | 0.933058808850633  | 0.029210987992252   | 5 | Il17ra    |
| 2.1446465689486e-06  | 0.668366978758098  | 0.0296197137637491  | 5 | Abca9     |
| 2.2014562887262e-06  | 0.473325721912153  | 0.0304043128035976  | 5 | Prg4      |



|                      |                    |                    |   |             |
|----------------------|--------------------|--------------------|---|-------------|
| 2.23724893327532e-06 | 0.661292054607189  | 0.0308986450174654 | 5 | Irf1        |
| 2.27982913829357e-06 | 0.883290082493336  | 0.0314867202289725 | 5 | Fam102b     |
| 2.55452313875893e-06 | -1.044344766       | 0.0352805190693996 | 5 | Dmpk        |
| 2.67702415117167e-06 | 0.892028363166816  | 0.0369723805518319 | 5 | Sfrp4       |
| 2.70619536654987e-06 | -0.627800027245482 | 0.0373752642074203 | 5 | Ctnnb1      |
| 2.7282068935193e-06  | -1.042433409       | 0.037679265406395  | 5 | Itga9       |
| 2.80947383773813e-06 | 0.686637244747722  | 0.0388016431730014 | 5 | Lpl         |
| 2.83803983039769e-06 | 0.792485883403742  | 0.0391961680976225 | 5 | Tiparp      |
| 3.04503450638858e-06 | 0.942174542690291  | 0.0420549715677326 | 5 | Tnfaip3     |
| 3.15690817718618e-06 | 0.444071337684688  | 0.0436000588351184 | 5 | Csmp1       |
| 3.22042702647559e-06 | 0.372183613111588  | 0.0444773176626544 | 5 | Gadd45b     |
| 3.2489199901347e-06  | 0.553772132259966  | 0.0448708339837503 | 5 | Lpar1       |
| 3.33724765119346e-06 | -0.565249843065738 | 0.0460907273106329 | 5 | Gpx1        |
| 3.41918655094368e-06 | -0.805031903465005 | 0.0472223854550831 | 5 | Lrrfip1     |
| 3.61976115356987e-06 | 0.462703277527978  | 0.0499925212919535 | 5 | Il1r1       |
| 4.01674067073769e-06 | -0.639674069884165 | 0.0554752054035583 | 5 | Crip2       |
| 4.03170456937322e-06 | 0.516216942182956  | 0.0556818718076135 | 5 | Man2b2      |
| 4.04341268577149e-06 | -0.962664937647542 | 0.0558435726031901 | 5 | Synpo       |
| 4.13616889774155e-06 | -1.642585269       | 0.0571246286467085 | 5 | 2200002D01f |
| 4.38835916180087e-06 | 0.621490725082071  | 0.0606076283836318 | 5 | Sbno2       |
| 4.51224731104956e-06 | -0.629506948354673 | 0.0623186476129054 | 5 | Flna        |
| 4.9025986061517e-06  | -1.675337837       | 0.0677097893495612 | 5 | Tinagl1     |
| 4.93657539897752e-06 | 0.498479950785132  | 0.0681790428352785 | 5 | Igsf10      |
| 4.95741515816544e-06 | -1.167588944       | 0.068466860749423  | 5 | Limch1      |
| 4.96954280093649e-06 | -0.543243081083565 | 0.0686343556237339 | 5 | Dusp3       |
| 5.02229986454296e-06 | -2.023536067       | 0.0693629834292028 | 5 | Sost        |
| 5.02805560300289e-06 | 0.647553253089485  | 0.0694424759330729 | 5 | Plat        |
| 5.46850195210279e-06 | 0.449589612580884  | 0.0755254804604917 | 5 | Ddr2        |
| 5.73974949110141e-06 | 0.686171473085233  | 0.0792716802216015 | 5 | Ms4a4d      |
| 5.78735476770941e-06 | 0.319650711042068  | 0.0799291566968347 | 5 | Il11ra1     |
| 5.8879098310214e-06  | -1.267943847       | 0.0813179226762365 | 5 | Lims2       |
| 6.1637754576569e-06  | 0.722129765414135  | 0.0851279028456994 | 5 | Adamtsl1    |
| 7.05384664774145e-06 | 0.388400929801703  | 0.0974206760519571 | 5 | Lima1       |
| 7.48468209622344e-06 | -0.632446467021476 | 0.103370944430942  | 5 | Cald1       |
| 7.53195446038316e-06 | 0.301920668900893  | 0.104023823052352  | 5 | Calr        |
| 7.8414280728666e-06  | -1.34068677        | 0.108297963114361  | 5 | Mtus2       |
| 7.97807961090718e-06 | 0.598096453019084  | 0.110185257506239  | 5 | Plscr1      |
| 8.05194790008223e-06 | 0.672834234664612  | 0.111205452448036  | 5 | Fnip1       |
| 8.20673981710006e-06 | 0.611376953149912  | 0.113343283613969  | 5 | Birc3       |
| 8.50632877815931e-06 | 0.568088241400236  | 0.117480906755158  | 5 | Tshz2       |
| 8.77071497360407e-06 | 0.574693342270511  | 0.121132344500446  | 5 | Nsg1        |
| 8.77734664560623e-06 | 0.307935249052212  | 0.121223934522468  | 5 | Fosb        |
| 8.81011320332148e-06 | 0.483906309        | 0.121676473451073  | 5 | Tmem100     |
| 8.8397490486567e-06  | -1.698755049       | 0.122085774110998  | 5 | Pecam1      |
| 9.08994448500353e-06 | 0.391120513        | 0.125541223282384  | 5 | Lamp2       |
| 9.19705298225903e-06 | 0.800914682968701  | 0.127020498737979  | 5 | Tmeff2      |
| 9.24234553079155e-06 | -1.158963086       | 0.127646034125762  | 5 | Bcam        |
| 9.37533614402056e-06 | 0.480993499496969  | 0.129482767485068  | 5 | Timp1       |
| 9.47454354186035e-06 | 0.321389111908522  | 0.130852920856633  | 5 | C4a         |
| 9.48036024435303e-06 | 0.523459311817283  | 0.130933255        | 5 | Ifrd1       |
| 9.50801755218587e-06 | -1.663285947       | 0.131315230413239  | 5 | Thsd4       |
| 9.83922320195117e-06 | -1.427499403       | 0.135889511642148  | 5 | Pdlim3      |
| 1.06487929424828e-05 | 0.504703981659967  | 0.147070479328629  | 5 | Mmp14       |
| 1.09552740527306e-05 | 0.360753611372222  | 0.151303289942262  | 5 | Hnrmpa2b1   |
| 1.11065407698417e-05 | -1.221363088       | 0.153392434572284  | 5 | Smtn        |
| 1.1443386259065e-05  | -0.518742921400936 | 0.158044607623946  | 5 | Tmsb4x      |



|                      |                    |                   |   |            |
|----------------------|--------------------|-------------------|---|------------|
| 1.22610405023086e-05 | 0.64630438         | 0.169337230377384 | 5 | Ngf        |
| 1.26485809670996e-05 | -0.761032280246101 | 0.174689551736613 | 5 | Oxct1      |
| 1.50152472049565e-05 | 0.779016402355342  | 0.207375579147654 | 5 | Lrrc49     |
| 1.50832602324693e-05 | 1.812297015        | 0.208314907070634 | 5 | Hp         |
| 1.54944641944142e-05 | -1.827433401       | 0.213994044989054 | 5 | Kcnmb1     |
| 1.58104592950973e-05 | 0.646882880880436  | 0.218358253324589 | 5 | Slc16a2    |
| 1.61884649038987e-05 | 0.666363583547915  | 0.223578888787745 | 5 | Thy1       |
| 1.62000391768846e-05 | -0.808145356491467 | 0.223738741071954 | 5 | Ppp1r12a   |
| 1.67945107510402e-05 | 0.311969368988789  | 0.231948987982616 | 5 | Junb       |
| 1.6957944769526e-05  | -0.828614652559691 | 0.234206175211924 | 5 | Pcdh7      |
| 1.77197582026264e-05 | 0.873247041211707  | 0.244727580536473 | 5 | Bmper      |
| 1.82637167993999e-05 | 1.625342368        | 0.252240192716513 | 5 | Kazn       |
| 1.846168842652E-05   | 0.441177673261424  | 0.254974378858668 | 5 | Mmp23      |
| 1.85822649348587e-05 | -0.792591043862431 | 0.256639661015334 | 5 | Kctd10     |
| 1.86005723548579e-05 | 0.428319586056258  | 0.256892504792942 | 5 | Meg3       |
| 1.87005656846343e-05 | -1.054556824       | 0.258273512670485 | 5 | Nexn       |
| 1.89393975313804e-05 | -1.471457368       | 0.261572019305895 | 5 | Gucy1b3    |
| 1.90360184536231e-05 | -1.205216423       | 0.262906450862989 | 5 | Stom       |
| 1.94033564808023e-05 | -0.960533757508383 | 0.267979756       | 5 | Myo1e      |
| 2.01513069406615e-05 | -0.486268618455036 | 0.278309700157475 | 5 | Pnpla2     |
| 2.02255943202186e-05 | 0.346420267407744  | 0.279335683156538 | 5 | Sfpq       |
| 2.13819181018976e-05 | 0.556083532209085  | 0.295305670905308 | 5 | B4galt5    |
| 2.29567996125083e-05 | 0.307236725548073  | 0.317056359448352 | 5 | Rps15a-ps6 |
| 2.33025723392965e-05 | -0.341021790187892 | 0.321831826578024 | 5 | Hes1       |
| 2.45563760510385e-05 | -0.859300841419344 | 0.339148109640893 | 5 | Postn      |
| 2.51596267799398e-05 | 0.789443523345976  | 0.347479605457748 | 5 | Sqrdl      |
| 2.58422458830687e-05 | -0.938359402691247 | 0.356907257891062 | 5 | Cav2       |
| 2.60300275381254e-05 | 0.528115077949645  | 0.359500710329049 | 5 | Thbd       |
| 2.71124262216146e-05 | -1.808637736       | 0.374449718546719 | 5 | Rgs4       |
| 2.75525559280532e-05 | -1.50251477        | 0.380528349922343 | 5 | Ppp1r14a   |
| 2.78876245932338e-05 | 0.722029184889502  | 0.385155983257152 | 5 | Trex1      |
| 2.87562806729417e-05 | 0.492085493923628  | 0.397152992373997 | 5 | Fbn1       |
| 2.89058997068039e-05 | 0.553826278691814  | 0.399219380850669 | 5 | Olfml2b    |
| 2.93408171582679e-05 | 0.265898524792154  | 0.405226025772837 | 5 | Egr1       |
| 3.08340396092161e-05 | 0.634178511011278  | 0.425848921042884 | 5 | Pdia4      |
| 3.39265184734496e-05 | -1.355430936       | 0.468559146636812 | 5 | Ptprb      |
| 3.44187374531803e-05 | -0.573303529655708 | 0.475357182965873 | 5 | Serpine2   |
| 3.4440377611814e-05  | 0.646681897964665  | 0.475656055196764 | 5 | Cyp27a1    |
| 3.46563832779154e-05 | -1.506282469       | 0.478639309451289 | 5 | Speg       |
| 3.47598543815249e-05 | 0.925129238012994  | 0.480068349       | 5 | Irak3      |
| 3.48431361116916e-05 | 0.283475416836017  | 0.481218552838572 | 5 | Ogn        |
| 3.74099350877036e-05 | 0.504586276685273  | 0.516668613496274 | 5 | Lgals9     |
| 3.79966784044961e-05 | 0.477852121330324  | 0.524772125444496 | 5 | Swi5       |
| 3.80764980799053e-05 | 0.530699684779278  | 0.525874514981572 | 5 | Medag      |
| 3.86007275252478e-05 | -1.182947422       | 0.533114647851197 | 5 | Plekhg3    |
| 3.90255648656615e-05 | -1.283309346       | 0.538982076359651 | 5 | Cdh13      |
| 3.95440277065273e-05 | -1.580691452       | 0.546142566654849 | 5 | Nes        |
| 4.04907429842382e-05 | 0.357158750057938  | 0.559217651355314 | 5 | Trip10     |
| 4.12959139053292e-05 | 0.592910891494601  | 0.570337866946501 | 5 | Hivep2     |
| 4.1513752283346e-05  | 0.774171276        | 0.573346432785291 | 5 | Tubb6      |
| 4.27401290745763e-05 | 0.363993839053592  | 0.590283922648974 | 5 | Serpinh1   |
| 4.36550511830958e-05 | 1.728000371        | 0.602919911889736 | 5 | Ccl8       |
| 4.37067584704556e-05 | 0.706687781614316  | 0.603634041235462 | 5 | Thbs3      |
| 4.43913046236585e-05 | -1.222149089       | 0.613088308157348 | 5 | Gpr116     |
| 4.59989337059494e-05 | 0.373020602802455  | 0.635291273412867 | 5 | Pmp22      |
| 4.93425218346553e-05 | -0.950692839289843 | 0.681469569058425 | 5 | Cav1       |

|                      |                    |                   |   |          |
|----------------------|--------------------|-------------------|---|----------|
| 5.11407071325043e-05 | 0.508653202095596  | 0.706304306207017 | 5 | Ier5     |
| 5.30958139556681e-05 | 0.330831751260808  | 0.733306286541733 | 5 | Eif4a1   |
| 5.5493554099265e-05  | 0.472605464145545  | 0.766421475664949 | 5 | Fam46a   |
| 5.70372779737804e-05 | 0.512223653527742  | 0.787741846       | 5 | Ctsk     |
| 5.76392687271065e-05 | -1.128958779       | 0.796055940390069 | 5 | Mgll     |
| 5.79210944907141e-05 | 0.718177899669736  | 0.799948236011253 | 5 | Ptp4a1   |
| 5.80287006410632e-05 | -0.870599973553932 | 0.801434384553724 | 5 | Cytl1    |
| 5.99688739184022e-05 | 0.282931299535643  | 0.828230117687053 | 5 | Klf4     |
| 6.03985022636031e-05 | -0.541102143482628 | 0.834163714762623 | 5 | Ccnd2    |
| 6.18644624945946e-05 | -0.400369030437805 | 0.854410091512846 | 5 | Dst      |
| 6.68636088041753e-05 | -1.200817313       | 0.923453301194465 | 5 | Fgf1     |
| 6.79159914538057e-05 | 1.178593889        | 0.937987757968511 | 5 | Sult5a1  |
| 7.01196378019707e-05 | -0.511192406306074 | 0.968422317683018 | 5 | Hspa1a   |
| 7.01506297504235e-05 | -0.931601774       | 0.968850347483099 | 5 | Bmp4     |
| 7.10860980843017e-05 | 0.884684788696813  | 0.981770100642291 | 5 | Ssbp2    |
| 7.19728926828538e-05 | 0.356759670554237  | 0.994017620842893 | 5 | Daam1    |
| 7.37692053308672e-05 | 0.771874229716183  | 1                 | 5 | Pdpn     |
| 7.56578163651803e-05 | -0.532550650839762 | 1                 | 5 | Col4a6   |
| 7.92551491516333e-05 | 0.676971133792162  | 1                 | 5 | C1qtnf1  |
| 8.000091042605E-05   | 0.406556604417282  | 1                 | 5 | Serp1    |
| 8.13246359027607e-05 | -0.324653029024429 | 1                 | 5 | Pam      |
| 8.23801376372059e-05 | -1.649561289       | 1                 | 5 | Sh3bgr   |
| 8.33865912988941e-05 | -1.933669282       | 1                 | 5 | Mmm2     |
| 8.55878737532906e-05 | 0.273344810364679  | 1                 | 5 | Svep1    |
| 8.64671119775291e-05 | 0.316716452467813  | 1                 | 5 | Ppiib    |
| 8.69744189799837e-05 | 0.347265725202141  | 1                 | 5 | Col5a1   |
| 8.76784577229746e-05 | -1.971931026       | 1                 | 5 | Hspb6    |
| 8.84670703457102e-05 | 1.025722281        | 1                 | 5 | Arsa     |
| 9.11140031110876e-05 | 0.617147698508769  | 1                 | 5 | Podn     |
| 9.30479540120673e-05 | -1.173492377       | 1                 | 5 | Kif1c    |
| 9.41048350234666e-05 | -1.386984757       | 1                 | 5 | Slc9a3r2 |
| 9.52550697560714e-05 | -0.623483723421111 | 1                 | 5 | Atp2b4   |
| 9.929256275357E-05   | 0.256507120962371  | 1                 | 5 | Sepp1    |
| 0.000101002005932164 | 1.203732887        | 1                 | 5 | Lif      |
| 0.000101555476465797 | -1.3240068         | 1                 | 5 | Tspan7   |
| 0.000105666051423638 | -0.504012085286861 | 1                 | 5 | Rock1    |
| 0.000107300557709298 | 0.672985724307066  | 1                 | 5 | Pamr1    |
| 0.000109044657789033 | -0.975979580960615 | 1                 | 5 | Uchl1    |
| 0.000109586930236479 | -0.747911266       | 1                 | 5 | Mical2   |
| 0.000112493107091599 | 0.364988023622853  | 1                 | 5 | Napa     |
| 0.000113857797264968 | 0.399500758810343  | 1                 | 5 | Lsp1     |
| 0.00011401285646193  | 0.373563854767144  | 1                 | 5 | Nav1     |
| 0.000114607195397335 | -0.550792001641143 | 1                 | 5 | Wwtr1    |
| 0.000116698661294244 | 0.540750424644536  | 1                 | 5 | Gpnmb    |
| 0.000119199016314242 | -1.235320542       | 1                 | 5 | Clec14a  |
| 0.000119905648537078 | 0.823811558705165  | 1                 | 5 | Tnnt3    |
| 0.000122184731406302 | -0.267829492445085 | 1                 | 5 | Mgp      |
| 0.000122782999526539 | 0.820656425472405  | 1                 | 5 | Pcdh19   |
| 0.000124215727871601 | -0.772476623240904 | 1                 | 5 | Col18a1  |
| 0.000125609595026478 | 0.683759685621414  | 1                 | 5 | Xdh      |
| 0.000126857012730632 | 0.555770640589724  | 1                 | 5 | Man2b1   |
| 0.000130054655515471 | 0.429328098329881  | 1                 | 5 | Clip4    |
| 0.000132945645159485 | 0.286776019423006  | 1                 | 5 | Serpnb6a |
| 0.000134282348654379 | -0.342207053585455 | 1                 | 5 | Pmepa1   |
| 0.000135999302103149 | -1.801714735       | 1                 | 5 | Bmx      |
| 0.000136586372891232 | -1.395947447       | 1                 | 5 | Asap2    |

|                      |                    |   |   |            |
|----------------------|--------------------|---|---|------------|
| 0.000141579477876777 | 0.589958905437087  | 1 | 5 | Prrx1      |
| 0.000141723100576286 | 0.527712921041852  | 1 | 5 | Dennd2a    |
| 0.000144956358823675 | -0.545100794       | 1 | 5 | Dkk3       |
| 0.000148457035566503 | 0.378497867464613  | 1 | 5 | Vkorc1     |
| 0.000149805958199249 | 0.700276689340495  | 1 | 5 | Dram1      |
| 0.000150436035427524 | 0.501747851522277  | 1 | 5 | Hspb8      |
| 0.000155041160807289 | -1.127567618       | 1 | 5 | Crim1      |
| 0.000155924255216353 | -0.774329807841656 | 1 | 5 | Myl6       |
| 0.000157909164012743 | -0.859998286715809 | 1 | 5 | Fbxo22     |
| 0.000164795434241837 | -0.736967874127523 | 1 | 5 | Lama5      |
| 0.000164961561159029 | -0.735713364914061 | 1 | 5 | Samd4      |
| 0.000165606249301076 | 0.455898423616983  | 1 | 5 | Pnp        |
| 0.000167753258060759 | 0.401469050518513  | 1 | 5 | Fcgrt      |
| 0.000168424319651954 | 0.659444566750802  | 1 | 5 | Ifi203     |
| 0.000171669266999048 | -0.866198822500207 | 1 | 5 | Gm13889    |
| 0.000172969474452313 | -0.828456055927902 | 1 | 5 | 1500015O10 |
| 0.000174525801659206 | 0.612892623        | 1 | 5 | Gja1       |
| 0.000179583738991542 | 0.276573250049627  | 1 | 5 | Col1a1     |
| 0.00018579721064658  | -1.633325292       | 1 | 5 | Fmo3       |
| 0.00018622432767786  | -0.785205393027465 | 1 | 5 | Msrb3      |
| 0.000186604300100269 | -1.377021696       | 1 | 5 | Serpib6b   |
| 0.000192772298765199 | -1.549227993       | 1 | 5 | Tnk2       |
| 0.000195311426045637 | 0.570433189094505  | 1 | 5 | Rftn1      |
| 0.000197168299408594 | 0.339991664061106  | 1 | 5 | Nbl1       |
| 0.000197841057779151 | 0.387196507192843  | 1 | 5 | Bag3       |
| 0.000197948348998478 | 0.361133138380217  | 1 | 5 | Lamc1      |
| 0.000203094772608296 | 0.624511105609141  | 1 | 5 | Ston2      |
| 0.000203750113101228 | 0.483281275603071  | 1 | 5 | Nfkb1      |
| 0.000205102140728826 | 0.274008408855759  | 1 | 5 | Rpn2       |
| 0.000208890212699989 | -1.443986706       | 1 | 5 | Rbpms2     |
| 0.000211607354457169 | 0.314588235        | 1 | 5 | Vcan       |
| 0.000212919542004283 | -0.861582388339245 | 1 | 5 | Smarcd3    |
| 0.000229348473427006 | 0.448687627929454  | 1 | 5 | Ugp2       |
| 0.000233075220505496 | -0.843138401       | 1 | 5 | Frzb       |
| 0.000235236922268455 | 0.412047412099803  | 1 | 5 | Rad23a     |
| 0.000239256742069287 | -1.753624259       | 1 | 5 | Nos3       |
| 0.000242045878291362 | -0.613848216454358 | 1 | 5 | Tgm2       |
| 0.000244755766172328 | 0.258199723809866  | 1 | 5 | Sqstm1     |
| 0.000250937848494012 | -1.202315803       | 1 | 5 | Nxn        |
| 0.000253092486026924 | 0.704043172135972  | 1 | 5 | Flrt2      |
| 0.000254735233545829 | -0.764693703070644 | 1 | 5 | Adh5       |
| 0.000258991782096041 | 0.654387252445553  | 1 | 5 | Irgm1      |
| 0.000261473766491601 | -0.866726564477965 | 1 | 5 | Pi15       |
| 0.000262036066791576 | 0.509165886903776  | 1 | 5 | Adamtsl3   |
| 0.000270685830334799 | 0.994724320326671  | 1 | 5 | Galnt16    |
| 0.000270975763900246 | 0.556202735888691  | 1 | 5 | Gaa        |
| 0.000275705027150369 | 0.619030829        | 1 | 5 | Usp16      |
| 0.000275758648382963 | -0.756386148554838 | 1 | 5 | Ptdss1     |
| 0.00027604718214683  | 0.277655889597401  | 1 | 5 | Cd47       |
| 0.000276139309106021 | -1.191568735       | 1 | 5 | Heyl       |
| 0.000281028855255218 | -0.656777993756491 | 1 | 5 | Chtop      |
| 0.000289603573724285 | -1.116561379       | 1 | 5 | Fam13c     |
| 0.000298706989433285 | 1.205730722        | 1 | 5 | Isg20      |
| 0.000304035399180457 | -1.225308148       | 1 | 5 | St3gal5    |
| 0.000307058764092121 | 0.336131563652339  | 1 | 5 | Sntb2      |
| 0.000308447814436057 | 0.625420947987262  | 1 | 5 | Mndal      |

|                      |                    |   |   |          |
|----------------------|--------------------|---|---|----------|
| 0.000308866805834763 | 0.527628073632154  | 1 | 5 | Olfml1   |
| 0.000310330762897048 | -1.373613116       | 1 | 5 | Tom1l2   |
| 0.000310819926814209 | -0.836836519141834 | 1 | 5 | Vasp     |
| 0.000316274457195218 | -1.166594102       | 1 | 5 | Mrvi1    |
| 0.000320180325155281 | 0.356768516        | 1 | 5 | Zcchc24  |
| 0.000323293242119517 | -1.076352203       | 1 | 5 | Ano10    |
| 0.000328803353399914 | -0.703549493500236 | 1 | 5 | Cd97     |
| 0.000330811144469158 | -1.727132644       | 1 | 5 | Tes      |
| 0.000331293847330952 | 0.323641002839225  | 1 | 5 | Rpsa     |
| 0.00033385721350331  | 0.608439094960897  | 1 | 5 | Pgap2    |
| 0.000334033472308145 | 0.347097064744911  | 1 | 5 | Lama2    |
| 0.000338192009409846 | 0.477807505        | 1 | 5 | Jmjd1c   |
| 0.000341331421035541 | 0.346719050881818  | 1 | 5 | Epb4.1l2 |
| 0.000343253467877964 | 0.626630843192758  | 1 | 5 | Shmt2    |
| 0.000348332119340794 | -0.702344919738361 | 1 | 5 | Id1      |
| 0.00035136096833386  | 0.827079944664021  | 1 | 5 | Mms19    |
| 0.000353542850145798 | 0.428392153354799  | 1 | 5 | Fkbp2    |
| 0.00035555187978584  | -0.702160410996681 | 1 | 5 | Tmem47   |
| 0.000357204509284907 | -0.804503053354126 | 1 | 5 | Pbxip1   |
| 0.000358141122592225 | 0.634342300489419  | 1 | 5 | Lamb1    |
| 0.000361207720900411 | 0.324411184680738  | 1 | 5 | Tubb4b   |
| 0.000362855962421431 | 1.430236349        | 1 | 5 | Arhgap28 |
| 0.000366081230247131 | -0.961793200655511 | 1 | 5 | Map1a    |
| 0.000370330096741633 | -1.453205053       | 1 | 5 | Npy1r    |
| 0.000371362071582822 | 0.684296776794578  | 1 | 5 | Abcb1b   |
| 0.000377006620559795 | 0.337166520898032  | 1 | 5 | Zeb2     |
| 0.000383099528853723 | 0.259205030027642  | 1 | 5 | Ifi27l2a |
| 0.000388898768662935 | 0.279503181073264  | 1 | 5 | Pdia6    |
| 0.000391092134256982 | 0.586924244243806  | 1 | 5 | Ssc5d    |
| 0.000395618799796898 | -0.656037566130983 | 1 | 5 | Phldb2   |
| 0.000397294215306484 | -0.595544087061294 | 1 | 5 | Ndufb10  |
| 0.000412992140080735 | -0.734814196584128 | 1 | 5 | S100a4   |
| 0.000424862326315575 | 0.445640970560947  | 1 | 5 | Clec11a  |
| 0.000438366519564022 | -0.527035440565845 | 1 | 5 | Ptgis    |
| 0.00044699792214496  | 0.467600223149723  | 1 | 5 | Runx1    |
| 0.000461903284783185 | 0.669763556454213  | 1 | 5 | Tsta3    |
| 0.000466388536379904 | -0.361185651056496 | 1 | 5 | Fnta     |
| 0.000470028819970171 | -0.644000608864897 | 1 | 5 | Actg2    |
| 0.000474089574684484 | -0.354929625983028 | 1 | 5 | Col4a1   |
| 0.00047694052441512  | 0.346466346435049  | 1 | 5 | Igf1     |
| 0.00047809693274436  | 0.562689689488643  | 1 | 5 | Tnfsf13b |
| 0.000478571271240529 | 0.825250871914077  | 1 | 5 | Arid5a   |
| 0.000482257508845199 | -1.012928514       | 1 | 5 | Itga7    |
| 0.000484357017202518 | -1.037010928       | 1 | 5 | Pomgnt1  |
| 0.000488418366639915 | -1.53081987        | 1 | 5 | Icam2    |
| 0.000492015715883272 | 0.567468543242253  | 1 | 5 | Slc10a6  |
| 0.000508275668240853 | -0.618753805494656 | 1 | 5 | Tnfaip1  |
| 0.000516144758120659 | -0.529120442593618 | 1 | 5 | Iqgap1   |
| 0.000522368301726821 | 0.342973058781326  | 1 | 5 | Efemp2   |
| 0.00052585680253545  | 0.307043563941377  | 1 | 5 | Gpc6     |
| 0.000526791279639949 | 0.687418970046203  | 1 | 5 | Pim3     |
| 0.000535587240841652 | 0.255034679482328  | 1 | 5 | Usp2     |
| 0.000556183139250149 | 0.988885726780348  | 1 | 5 | Smg7     |
| 0.000566708208540252 | -1.687842329       | 1 | 5 | Podxl    |
| 0.00057503898830598  | 0.453191920043877  | 1 | 5 | Scd1     |
| 0.000577388208188401 | 0.929807190002403  | 1 | 5 | Itga11   |

|                      |                    |   |   |           |
|----------------------|--------------------|---|---|-----------|
| 0.000578026762530315 | 0.613907312888622  | 1 | 5 | C1galt1   |
| 0.000588065889861372 | -0.524033221873084 | 1 | 5 | Trp53inp2 |
| 0.00059213023607862  | 0.282562522300288  | 1 | 5 | Gabarap   |
| 0.000593639181671507 | 0.250653132611315  | 1 | 5 | Ubc       |
| 0.000596011178331422 | 0.382407227031717  | 1 | 5 | Sf3b1     |
| 0.000599338196942466 | 0.263070967        | 1 | 5 | Arf4      |
| 0.000599847818296277 | -1.122487154       | 1 | 5 | Itgb3     |
| 0.000610577818177194 | 0.269936594        | 1 | 5 | Col6a1    |
| 0.000611864927887162 | 0.901391245028108  | 1 | 5 | Zc3h12a   |
| 0.000612312567360286 | 0.717113660399027  | 1 | 5 | Sobp      |
| 0.000619321018197031 | -1.185497548       | 1 | 5 | Inpp5a    |
| 0.000621398592825171 | -0.482142329704908 | 1 | 5 | Col4a2    |
| 0.000621655652411159 | -0.399049087383692 | 1 | 5 | Serinc3   |
| 0.000623600646311854 | 0.423349989729068  | 1 | 5 | Pltp      |
| 0.000637093341303553 | 0.448221321046905  | 1 | 5 | Gosr2     |
| 0.000639561269438628 | 0.652697912        | 1 | 5 | Loxl2     |
| 0.000641271030367214 | -0.659860546       | 1 | 5 | Filip1l   |
| 0.000643837950196017 | 0.502842432296936  | 1 | 5 | Ssh2      |
| 0.000668090034018884 | -0.573908817589931 | 1 | 5 | Fert2     |
| 0.000675977936752022 | 0.272248523        | 1 | 5 | Rps15a    |
| 0.000682375176464996 | -1.228591994       | 1 | 5 | Ltbp2     |
| 0.000683303870730507 | 0.534423589        | 1 | 5 | Emc2      |
| 0.000692288308321263 | -0.388602901124913 | 1 | 5 | Cyb5r3    |
| 0.000701803037643213 | -0.551630198772409 | 1 | 5 | Nol7      |
| 0.000709511573364034 | 0.471788738590657  | 1 | 5 | Gna13     |
| 0.000712268806286771 | 0.623955735356773  | 1 | 5 | Prrx2     |
| 0.000714811055869185 | -0.579897962294029 | 1 | 5 | Rabif     |
| 0.000735504624727368 | 0.460966890416503  | 1 | 5 | Asap3     |
| 0.000736943839808867 | 1.122297245        | 1 | 5 | Smpd3     |
| 0.000747935477637597 | -0.536769270640474 | 1 | 5 | Psmc3     |
| 0.000754701381475503 | -1.471552478       | 1 | 5 | Cd93      |
| 0.000755302973962271 | 0.535042593992394  | 1 | 5 | Igsf8     |
| 0.000756570382927577 | 0.283627391415904  | 1 | 5 | Ppp1r15b  |
| 0.000761739056023612 | 0.803987593388689  | 1 | 5 | Gpr39     |
| 0.000762284705385601 | -0.724609839532823 | 1 | 5 | Nuak1     |
| 0.000765154062154574 | 0.669779636671526  | 1 | 5 | Cish      |
| 0.000777834760315207 | 0.657930407687842  | 1 | 5 | Sema3b    |
| 0.000783601841619906 | 0.383896163748981  | 1 | 5 | Camk2n1   |
| 0.000791721631061698 | 0.514035810298898  | 1 | 5 | Creb5     |
| 0.000792148990355779 | 0.278379414336698  | 1 | 5 | Gadd45g   |
| 0.000805996239901499 | 0.379242480396495  | 1 | 5 | Gm        |
| 0.000809028256065496 | -0.736376463721454 | 1 | 5 | Rasl12    |
| 0.000810900983254539 | -1.028154839       | 1 | 5 | Rassf3    |
| 0.000813238002499526 | 0.579551802848632  | 1 | 5 | Adam33    |
| 0.000824287633058073 | 0.686098568189637  | 1 | 5 | Nubp2     |
| 0.000828085253995038 | 0.402360375515936  | 1 | 5 | Plekhh2   |
| 0.000828960979251685 | 0.561244628458182  | 1 | 5 | Ppapdc1b  |
| 0.000831091662977296 | 0.415029581914899  | 1 | 5 | Hexa      |
| 0.00083351596279271  | -1.036906679       | 1 | 5 | Sort1     |
| 0.000836761855260016 | 0.281672579688018  | 1 | 5 | Dnajb9    |
| 0.000839806607962389 | -0.411214003331627 | 1 | 5 | Myh10     |
| 0.000848263574026371 | -0.386353016969187 | 1 | 5 | Tsc22d1   |
| 0.000851607631396391 | -0.640268985617308 | 1 | 5 | Inhba     |
| 0.000857137995360326 | -0.887686796624735 | 1 | 5 | Agm       |
| 0.000866481548306894 | 0.258362779227218  | 1 | 5 | Kcnq1ot1  |
| 0.000873494835581108 | 0.327921817088596  | 1 | 5 | Ddost     |



|                      |                    |   |   |             |
|----------------------|--------------------|---|---|-------------|
| 0.000893166570449105 | -0.737149381796721 | 1 | 5 | Fry         |
| 0.000895983469901709 | 0.572498990057297  | 1 | 5 | Rfx5        |
| 0.00089941042219239  | 0.275271757512354  | 1 | 5 | Lum         |
| 0.000899711497462847 | -0.604891052032056 | 1 | 5 | Rbpms       |
| 0.000900598549696416 | -0.758744705256122 | 1 | 5 | Arhgef2     |
| 0.000908878896698018 | 0.729106110947389  | 1 | 5 | Lrrc61      |
| 0.000911589666654501 | 0.857336495359816  | 1 | 5 | Fgf7        |
| 0.000920452206505473 | -0.340354106889532 | 1 | 5 | Arhgef17    |
| 0.000931641088467776 | -0.977653529743577 | 1 | 5 | Fam135a     |
| 0.000943640357629076 | 0.284048054660586  | 1 | 5 | Fbln7       |
| 0.000948554483338151 | -0.339808118497721 | 1 | 5 | Ltbp3       |
| 0.000949046435044617 | 0.597339369234376  | 1 | 5 | Abca8b      |
| 0.000961283289884589 | 1.054563717        | 1 | 5 | Has2        |
| 0.000983951598906779 | -1.850079082       | 1 | 5 | Ptpnz1      |
| 0.000994986594865264 | 0.753968462050573  | 1 | 5 | Ccl19       |
| 0.000995238833691447 | -1.011721314       | 1 | 5 | Fam126b     |
| 0.000995519561634434 | -1.557675196       | 1 | 5 | Gja4        |
| 0.00099801482320739  | -0.740608319910388 | 1 | 5 | F2r         |
| 0.00102441442549744  | 0.344749016933775  | 1 | 5 | Scara3      |
| 0.00103234279883904  | 0.678578326879416  | 1 | 5 | Slc44a1     |
| 0.00103328662934195  | -1.562139249       | 1 | 5 | Efcab4a     |
| 0.00103710075733919  | -0.721370328604463 | 1 | 5 | Cep290      |
| 0.00104992517238172  | -0.549861917248617 | 1 | 5 | Csrp2       |
| 0.00106375254595909  | -1.104608926       | 1 | 5 | Syde1       |
| 0.00106638919711396  | -0.802291917739549 | 1 | 5 | Ano1        |
| 0.00108246157700658  | -0.528878203379864 | 1 | 5 | Cox5a       |
| 0.00108395137771293  | 0.277847518        | 1 | 5 | Dpp9        |
| 0.001086004601216    | 0.279055558403718  | 1 | 5 | Abi3bp      |
| 0.00108711255557821  | 0.423134563028658  | 1 | 5 | Zfp945      |
| 0.00109286255002273  | -0.424845518785915 | 1 | 5 | Dgka        |
| 0.00111302046491861  | -1.214840687       | 1 | 5 | Hrct1       |
| 0.00114437542188467  | -0.676315561538028 | 1 | 5 | Polr2g      |
| 0.00115071527088439  | -0.682987695733832 | 1 | 5 | Zc2hc1a     |
| 0.0011541570836963   | 0.361739291437883  | 1 | 5 | Tgfbf       |
| 0.00120497184155092  | 0.417388107665506  | 1 | 5 | Naga        |
| 0.00121687644560742  | -1.71666378        | 1 | 5 | E030013119R |
| 0.00124128310378926  | -0.887195151247233 | 1 | 5 | Cdh5        |
| 0.00125025029730782  | 0.267269428869747  | 1 | 5 | Nfkbiz      |
| 0.00125702129042439  | -0.922515405372782 | 1 | 5 | Arhgef18    |
| 0.00126405494664957  | 0.345210699928642  | 1 | 5 | Gba         |
| 0.00126617720707019  | 0.259774422107498  | 1 | 5 | Gm6654      |
| 0.00126760740604957  | 0.559112207135149  | 1 | 5 | Shc2        |
| 0.00129914622134743  | 0.564721631277025  | 1 | 5 | Mmp19       |
| 0.00130127487923135  | -0.540415104978865 | 1 | 5 | Cdc42bpa    |
| 0.00131775553797515  | -0.452791858797451 | 1 | 5 | Nsmce4a     |
| 0.00132187382101157  | 0.539214698740906  | 1 | 5 | Casp4       |
| 0.0013430692499414   | 0.299091297355717  | 1 | 5 | Fgfr1       |
| 0.00134617052351878  | -0.466991935515422 | 1 | 5 | Atp5f1      |
| 0.00135264934686406  | 0.372117490720012  | 1 | 5 | H3f3b       |
| 0.00136279433542898  | 0.273124746082334  | 1 | 5 | Ier3        |
| 0.00137289235473321  | 0.552685632702364  | 1 | 5 | Dtx4        |
| 0.00137788684456239  | -0.570560763349837 | 1 | 5 | 2900026A02F |
| 0.00138008494580484  | -0.767860719347456 | 1 | 5 | Rnf220      |
| 0.00138809159665347  | -0.610036389529225 | 1 | 5 | Hip1        |
| 0.00140280809307456  | -1.436795005       | 1 | 5 | Sorbs2      |
| 0.00140978554290544  | -1.106567069       | 1 | 5 | Adck3       |

|                     |                    |   |   |            |
|---------------------|--------------------|---|---|------------|
| 0.00141466976375068 | -0.991533348627671 | 1 | 5 | Rcan2      |
| 0.00142936097101561 | -0.565769011298559 | 1 | 5 | Bnip2      |
| 0.00144050004732709 | -0.529625688221171 | 1 | 5 | Bbip1      |
| 0.00144223785489501 | 0.407409297001162  | 1 | 5 | Ifnar2     |
| 0.00146852800569533 | -0.861209417081166 | 1 | 5 | Ptpn14     |
| 0.0015081503555359  | 0.516543124608681  | 1 | 5 | Tnfrsf1a   |
| 0.00153472691536435 | -0.270966287810579 | 1 | 5 | Calm1      |
| 0.00155784609314298 | -0.871909502495095 | 1 | 5 | Ppp1r11    |
| 0.00156577464090233 | -0.514979708289548 | 1 | 5 | Mrps12     |
| 0.00156792997908405 | 0.390194813256164  | 1 | 5 | Eif4g1     |
| 0.00158021649731294 | 0.353900077559136  | 1 | 5 | Rpl39      |
| 0.00162295947341527 | -0.469778551667785 | 1 | 5 | Cacna2d1   |
| 0.00165160598866868 | 0.672521021174089  | 1 | 5 | Ccng2      |
| 0.00165565844087475 | 1.102737714        | 1 | 5 | Ang        |
| 0.00166880155496927 | 0.842686237180709  | 1 | 5 | Slc16a9    |
| 0.00170832896025586 | -0.767347360718226 | 1 | 5 | 2210013O21 |
| 0.00171899973289486 | -0.689961474934146 | 1 | 5 | Mef2c      |
| 0.00173157132214689 | -0.851530558467147 | 1 | 5 | Slc4a2     |
| 0.00174308768284445 | -0.787159802371382 | 1 | 5 | Marveld1   |
| 0.00174955674216949 | 0.476390140741195  | 1 | 5 | Rhog       |
| 0.00175036447396751 | 0.395978223197192  | 1 | 5 | Jak1       |
| 0.0017663924591582  | -0.411522756557342 | 1 | 5 | Prkag1     |
| 0.00177332765565638 | 0.336489145317074  | 1 | 5 | Fuca1      |
| 0.00179280769840537 | -0.538780525784941 | 1 | 5 | Mfge8      |
| 0.0018288677792923  | 0.441871709017586  | 1 | 5 | Arhgap10   |
| 0.00185422223783058 | 0.400793596509221  | 1 | 5 | Ndel1      |
| 0.00185548705187992 | 0.519437546696566  | 1 | 5 | Gramd1a    |
| 0.00185778100590224 | -0.929306439138603 | 1 | 5 | Herc1      |
| 0.00186567168947613 | 0.330393801960439  | 1 | 5 | Rpl22l1    |
| 0.00186579373881002 | -0.759980252631376 | 1 | 5 | Rhobtb1    |
| 0.00190291147576987 | 0.447821268803343  | 1 | 5 | Naalad2    |
| 0.0019066064628591  | 0.493761086        | 1 | 5 | A4galt     |
| 0.00190859370006701 | 0.430669322689269  | 1 | 5 | Arhgap21   |
| 0.00193827458120514 | -1.058898191       | 1 | 5 | Tmtc2      |
| 0.001952993794463   | -0.662177705927333 | 1 | 5 | Chpt1      |
| 0.00198859625972688 | 0.264325475        | 1 | 5 | Cstb       |
| 0.00198957654085592 | 0.410015071796322  | 1 | 5 | Plekhf1    |
| 0.00200810159240904 | -0.734746484518376 | 1 | 5 | Sema5a     |
| 0.00204490438379081 | 0.288226879997076  | 1 | 5 | Eif2s2     |
| 0.00207772755867429 | -1.6122145         | 1 | 5 | Net1       |
| 0.00208199823957036 | -0.469175471848507 | 1 | 5 | Map4       |
| 0.00208753396625111 | 0.429982712361543  | 1 | 5 | Osmr       |
| 0.0021064076823161  | -1.148417448       | 1 | 5 | Sorbs1     |
| 0.00210891379500048 | -0.867680683933153 | 1 | 5 | Spag7      |
| 0.00213324205316983 | -0.648412930429428 | 1 | 5 | Cers4      |
| 0.00215229173524841 | -1.420999146       | 1 | 5 | Gcnt1      |
| 0.00216887942475748 | 0.306900245486694  | 1 | 5 | Tcn2       |
| 0.00217917684635698 | -0.948095581       | 1 | 5 | Tspan6     |
| 0.00218440735143339 | -0.502576020040888 | 1 | 5 | Smarca4    |
| 0.00220579234220756 | -1.417069806       | 1 | 5 | Selp       |
| 0.002205908386712   | 0.334849968505866  | 1 | 5 | Cxxc1      |
| 0.00222120375256888 | -0.661477270274337 | 1 | 5 | Plxna4     |
| 0.00223011536572505 | -0.556469967125799 | 1 | 5 | Atp1a2     |
| 0.0022310382988575  | -0.564960231925866 | 1 | 5 | Ppp1cb     |
| 0.00224468093341453 | -0.634154305550341 | 1 | 5 | 2310036O22 |
| 0.00224834546354096 | -0.628413819320301 | 1 | 5 | Slc48a1    |

|                     |                    |   |   |             |
|---------------------|--------------------|---|---|-------------|
| 0.00225566893843515 | -0.440232557526153 | 1 | 5 | Flnb        |
| 0.00229099583954172 | -0.655883703643481 | 1 | 5 | Hook3       |
| 0.00230349088515508 | 0.463402945214383  | 1 | 5 | Aff3        |
| 0.00239851761108786 | 0.286180149351412  | 1 | 5 | Ctsz        |
| 0.00241346537675974 | 0.263088819554548  | 1 | 5 | Nme2        |
| 0.00243786370447324 | 0.483706521687882  | 1 | 5 | Naglu       |
| 0.00243791966029327 | -0.339426608499545 | 1 | 5 | Hspb1       |
| 0.00245943421245439 | 0.349709894809525  | 1 | 5 | Dhx32       |
| 0.00252987906925261 | 0.736126177987442  | 1 | 5 | Mta3        |
| 0.00253442933826221 | 0.506295333848947  | 1 | 5 | Qpct        |
| 0.00253671733044107 | -0.686410940001775 | 1 | 5 | Rhob        |
| 0.0025739927095525  | -0.827416989036729 | 1 | 5 | 2010111101R |
| 0.00257944950391487 | -0.399970746258984 | 1 | 5 | Akap9       |
| 0.00259879484023137 | 0.337834205012878  | 1 | 5 | Ubtf        |
| 0.00261029624544346 | -0.731901693485003 | 1 | 5 | Mrpl15      |
| 0.00264495822358921 | 0.289317045031211  | 1 | 5 | Icam1       |
| 0.00264772253422935 | -0.907108172579675 | 1 | 5 | Atp2a3      |
| 0.00265426979247835 | 0.527038531753363  | 1 | 5 | Txnrd1      |
| 0.00266306466825442 | -0.752198413208933 | 1 | 5 | Tgfb1i1     |
| 0.00267731875530367 | -1.475072225       | 1 | 5 | 5930403L14F |
| 0.0026863790111717  | 0.299269986997618  | 1 | 5 | Hnmp1       |
| 0.00269915222140758 | 0.616898102238751  | 1 | 5 | Cpeb2       |
| 0.00270138886956081 | 0.592785503711098  | 1 | 5 | Galm        |
| 0.00270419781819792 | 0.723573771330246  | 1 | 5 | Procr       |
| 0.00270730953664545 | -0.338875721834751 | 1 | 5 | Rras        |
| 0.00271848050137209 | 0.741806165770575  | 1 | 5 | Pvr         |
| 0.00272299705436455 | -1.457042865       | 1 | 5 | Ankrd1      |
| 0.00272536512983038 | -0.261621460104635 | 1 | 5 | Jmy         |
| 0.00272639550265967 | -0.946395782846266 | 1 | 5 | Wdfy3       |
| 0.00273065385148858 | 0.323163333854743  | 1 | 5 | Bzw1        |
| 0.00274754036038264 | -0.598409359       | 1 | 5 | 1110001J03F |
| 0.00275326974307628 | 0.313084119506603  | 1 | 5 | Rpl38       |
| 0.00275486535642335 | 0.540467312721708  | 1 | 5 | Bdh2        |
| 0.00276874226652197 | -0.749414557762226 | 1 | 5 | Zak         |
| 0.00278006730845941 | 0.263601383156832  | 1 | 5 | Epb4.1l3    |
| 0.00279177319072564 | -0.452022027382954 | 1 | 5 | Wls         |
| 0.00280588809598074 | 0.277881385689758  | 1 | 5 | Hfe         |
| 0.00284070249493887 | 0.343819729053852  | 1 | 5 | Eif4b       |
| 0.00288060104854676 | 0.264799897143133  | 1 | 5 | Zc3h11a     |
| 0.00288874926968715 | 0.408343168031356  | 1 | 5 | Cluap1      |
| 0.00291076032559576 | -1.714087968       | 1 | 5 | F11r        |
| 0.00295147384128474 | 0.953012729830102  | 1 | 5 | Dot1l       |
| 0.00297443625323403 | 0.672647399062966  | 1 | 5 | Stk19       |
| 0.00298901214497821 | 0.266546051346294  | 1 | 5 | H6pd        |
| 0.00301201753480334 | 0.474095445051449  | 1 | 5 | Ncstn       |
| 0.00303406239997853 | -1.081730337       | 1 | 5 | Fryl        |
| 0.00304501168604299 | 0.461132796679844  | 1 | 5 | Bscl2       |
| 0.00307011099391086 | 0.358215547        | 1 | 5 | Sema3c      |
| 0.00307728585949186 | 0.516611207490084  | 1 | 5 | Hn1         |
| 0.00309738085977597 | -0.849747531558443 | 1 | 5 | Dusp8       |
| 0.00312338881459144 | 0.271644221        | 1 | 5 | Grina       |
| 0.00313696433276717 | 0.386480166212139  | 1 | 5 | Gem         |
| 0.00314991645876728 | -1.607579002       | 1 | 5 | Gja5        |
| 0.00317966207914261 | -0.981704443023591 | 1 | 5 | Phtf2       |
| 0.00319005675113269 | 0.431327338569531  | 1 | 5 | Pcdh18      |
| 0.00322365424566824 | 0.629472996531472  | 1 | 5 | Ube2j1      |

|                     |                    |   |   |            |
|---------------------|--------------------|---|---|------------|
| 0.00333981704270035 | -1.319182148       | 1 | 5 | Esam       |
| 0.00338791506983068 | 0.412534770693418  | 1 | 5 | Sh3kbp1    |
| 0.00345141830820011 | -0.556575261774389 | 1 | 5 | Strbp      |
| 0.0034730369903777  | 0.551261025222437  | 1 | 5 | Gas7       |
| 0.00355008348682414 | 0.284819710531035  | 1 | 5 | Stk40      |
| 0.00357191819441261 | -0.288571497553352 | 1 | 5 | Rbp1       |
| 0.00359641876399269 | 0.490193999216311  | 1 | 5 | Nop58      |
| 0.00359980301012757 | -0.613593752977786 | 1 | 5 | Coq2       |
| 0.00366175446376868 | -0.555400878758155 | 1 | 5 | 0610012G03 |
| 0.00371942723365678 | 0.703395569072918  | 1 | 5 | Fam102a    |
| 0.00374519452830272 | -1.09994386        | 1 | 5 | Atp1b2     |
| 0.00375389865388737 | -1.202205239       | 1 | 5 | Kcnab1     |
| 0.00376816268106967 | -1.11481584        | 1 | 5 | Tnc        |
| 0.00377099218904539 | -0.372845078986235 | 1 | 5 | Cd9        |
| 0.00377655532457994 | 0.697265505        | 1 | 5 | Cxcl10     |
| 0.0037858860893543  | 0.732492184589548  | 1 | 5 | Ttc7       |
| 0.00378968791968482 | 0.603743494915423  | 1 | 5 | Gnl3       |
| 0.00382072076261409 | -0.645866637927714 | 1 | 5 | Rab11a     |
| 0.00382665760611606 | 0.322686444752224  | 1 | 5 | Ssr2       |
| 0.00382703658898017 | -0.751988290952882 | 1 | 5 | Rasal2     |
| 0.00386429591410728 | -0.413627072706469 | 1 | 5 | Scp2       |
| 0.00386909499084658 | 0.516822643238365  | 1 | 5 | Ism1       |
| 0.00389132350352105 | -0.451491117636394 | 1 | 5 | Psmb6      |
| 0.00389598961893779 | -0.675502563836341 | 1 | 5 | Smim12     |
| 0.0039017644908746  | 0.763320258785567  | 1 | 5 | Man1a      |
| 0.00391012246480614 | 0.419065043818435  | 1 | 5 | Dlc1       |
| 0.00393082832558432 | -0.679529138179017 | 1 | 5 | Rsu1       |
| 0.00393229307488721 | -0.700405543010268 | 1 | 5 | Dusp6      |
| 0.00393512599402072 | 0.349783942007243  | 1 | 5 | Zhx2       |
| 0.00397328728428927 | 0.812491750511126  | 1 | 5 | Taf4b      |
| 0.00403132056674465 | -0.777566218519326 | 1 | 5 | Nat6       |
| 0.0040411515153139  | 0.358548224406489  | 1 | 5 | Sri        |
| 0.00404607551365612 | -0.705880595697622 | 1 | 5 | Ankrd46    |
| 0.00404880991981383 | -0.273385599213068 | 1 | 5 | Fbln5      |
| 0.00405455849299423 | -1.027114922       | 1 | 5 | Etl4       |
| 0.00405836714361927 | 0.527239958080464  | 1 | 5 | Endou      |
| 0.00407345214225742 | -0.396561605603551 | 1 | 5 | Ddx42      |
| 0.00408678767981566 | 0.308196400439732  | 1 | 5 | Gpx7       |
| 0.00410802991715268 | -0.455386995301573 | 1 | 5 | Pomp       |
| 0.00414134073711026 | 0.480507461302474  | 1 | 5 | Hilpda     |
| 0.0041560859227025  | -1.375305632       | 1 | 5 | Rgs7bp     |
| 0.00418110602209208 | -0.790885576589822 | 1 | 5 | Rbm10      |
| 0.00420286984818383 | -0.652407541750947 | 1 | 5 | Cdc37l1    |
| 0.00420905650538915 | -0.402528994717713 | 1 | 5 | Banf1      |
| 0.00422797924739832 | -0.508239946789849 | 1 | 5 | Esyt2      |
| 0.00424110552379437 | 0.612918905        | 1 | 5 | Hebp2      |
| 0.00427120879289165 | 0.312192083268149  | 1 | 5 | Ergic3     |
| 0.00427806199000769 | -0.371126611       | 1 | 5 | Xpr1       |
| 0.00435405296415628 | 0.266451179103272  | 1 | 5 | Dnm1       |
| 0.00436535664824183 | 0.825650760484781  | 1 | 5 | Fosl1      |
| 0.00440901324289013 | -0.698767760621827 | 1 | 5 | Gdi1       |
| 0.00442851069486497 | 0.291671861227663  | 1 | 5 | Tbc1d2b    |
| 0.00446775632762098 | -0.924741555193669 | 1 | 5 | Acs1l      |
| 0.00447814533068764 | -0.560328329341552 | 1 | 5 | Hras       |
| 0.00447868169420124 | 0.586489552269447  | 1 | 5 | Tle3       |
| 0.00450588775614423 | 0.404772417028608  | 1 | 5 | Gstm5      |

|                     |                    |   |   |          |
|---------------------|--------------------|---|---|----------|
| 0.00453842648629525 | -0.617541748785313 | 1 | 5 | Smad4    |
| 0.00459397624863355 | 0.357338585970998  | 1 | 5 | Arf6     |
| 0.00461067982358625 | 0.401834636795964  | 1 | 5 | Tspan31  |
| 0.00462158530465966 | -0.688769143680513 | 1 | 5 | Cds2     |
| 0.00463635576120066 | -0.616647325593666 | 1 | 5 | Ptk2     |
| 0.00472521504136374 | -0.293369060918525 | 1 | 5 | Prrc2b   |
| 0.00472957260401672 | 0.295787535810124  | 1 | 5 | Nr2f1    |
| 0.0047477821455608  | -1.027650485       | 1 | 5 | Spint2   |
| 0.00474855956994401 | 0.307527961865731  | 1 | 5 | Vasn     |
| 0.00478517266813958 | 0.313038010286427  | 1 | 5 | Cd44     |
| 0.00478601471708904 | 0.446336297737078  | 1 | 5 | Papss1   |
| 0.00487098342644571 | -1.049089648       | 1 | 5 | Edn1     |
| 0.00490720293554219 | 0.343668013        | 1 | 5 | Magt1    |
| 0.00492274360363838 | 0.278659280003006  | 1 | 5 | Sh3gl1   |
| 0.00494065623447937 | 1.054325638        | 1 | 5 | Eml4     |
| 0.00494387148343649 | 0.442036595942021  | 1 | 5 | Aqr      |
| 0.00500051013503409 | -0.659700363462022 | 1 | 5 | Ehbp111  |
| 0.00502736150237154 | 0.311675014        | 1 | 5 | Loxl1    |
| 0.00512109761956395 | -0.497450963636604 | 1 | 5 | Utp111   |
| 0.00516187217066221 | -0.738124123       | 1 | 5 | Zkscan17 |
| 0.00517594963164086 | -0.622367380662629 | 1 | 5 | Emc8     |
| 0.00518960020420892 | -0.761413069227955 | 1 | 5 | Pex19    |
| 0.00520720479103227 | -2.049875179       | 1 | 5 | Egfl7    |
| 0.00521644839083458 | 0.340104729        | 1 | 5 | Traf3    |
| 0.0052187830832556  | -0.468393767       | 1 | 5 | Dynlt3   |
| 0.00523342412780107 | -0.485622465971761 | 1 | 5 | Prkacb   |
| 0.00527063086260395 | 0.377946707357183  | 1 | 5 | Vat1     |
| 0.00528399119574125 | -0.480237619591334 | 1 | 5 | Ctsc     |
| 0.00529261147425227 | -0.974960271536638 | 1 | 5 | Osbp13   |
| 0.00531826565398667 | 0.683073409435386  | 1 | 5 | Plaur    |
| 0.0053337097330198  | -1.506150587       | 1 | 5 | Vwf      |
| 0.00533797518453853 | 0.451281584682039  | 1 | 5 | Lhfp12   |
| 0.00534227976012427 | 0.279774027794945  | 1 | 5 | Ewsr1    |
| 0.00536191512604209 | 0.261699211283365  | 1 | 5 | Ecm2     |
| 0.00537976079690468 | -0.823095206366672 | 1 | 5 | Itih2    |
| 0.00538805259664488 | 0.271510209260331  | 1 | 5 | Prdx5    |
| 0.00543905544803026 | -0.532537489808698 | 1 | 5 | Epn2     |
| 0.00543999792632012 | 0.319260136433329  | 1 | 5 | Il6st    |
| 0.00544783973142234 | -1.072946305       | 1 | 5 | Dsp      |
| 0.00544907030963862 | -1.165088923       | 1 | 5 | Serpini1 |
| 0.00546116883878711 | -0.652256199112686 | 1 | 5 | Zfyve16  |
| 0.0054768584079625  | -0.893903879032255 | 1 | 5 | Camk2g   |
| 0.00547775236513029 | -1.023534942       | 1 | 5 | Mkl2     |
| 0.0054957101922482  | -1.010943917       | 1 | 5 | Hey2     |
| 0.00549602320855487 | -0.822038430569496 | 1 | 5 | Pak2     |
| 0.00552535019272375 | -0.702300366267205 | 1 | 5 | Keap1    |
| 0.00555637200587274 | 0.481242283632737  | 1 | 5 | Antxr2   |
| 0.00558094270744721 | 0.589010631        | 1 | 5 | Rab43    |
| 0.005613765241292   | 0.630987009        | 1 | 5 | Gprc5b   |
| 0.00561453056123874 | 0.462782405324785  | 1 | 5 | Man2a1   |
| 0.00561828195416779 | -0.853473283940108 | 1 | 5 | Tmem164  |
| 0.0056323620309048  | -0.794085282       | 1 | 5 | Dennd5b  |
| 0.00564506402385793 | -1.617788657       | 1 | 5 | Stab1    |
| 0.00571206156180063 | -0.598725040393312 | 1 | 5 | Ndufs2   |
| 0.0057214635802511  | -0.401254876035301 | 1 | 5 | Gm20300  |
| 0.00583094450740648 | -0.637556073776821 | 1 | 5 | Gid4     |



|                     |                    |   |   |            |
|---------------------|--------------------|---|---|------------|
| 0.00588643956706239 | 1.137211101        | 1 | 5 | Irs2       |
| 0.00591549502122768 | -0.305933373703108 | 1 | 5 | Chrac1     |
| 0.00592293182746081 | 0.320191732388674  | 1 | 5 | Mybbp1a    |
| 0.00595956206454881 | -0.692984850802921 | 1 | 5 | Brwd1      |
| 0.00600124591203333 | -0.978711486003197 | 1 | 5 | Tef        |
| 0.00601351284976531 | -0.712591734651235 | 1 | 5 | Gucy1a3    |
| 0.00601850679100513 | 0.500562890128124  | 1 | 5 | Zfp217     |
| 0.0060480785237075  | -0.616416844104358 | 1 | 5 | Arl2       |
| 0.006050531004958   | 0.413481706839014  | 1 | 5 | Appl2      |
| 0.00605142405643944 | -0.488500476565467 | 1 | 5 | Rexo2      |
| 0.00609967301682273 | -0.514713653547215 | 1 | 5 | Acadm      |
| 0.00610184550107202 | -0.958466022073345 | 1 | 5 | Imp3       |
| 0.00617038488980069 | -0.383775362       | 1 | 5 | Zfp318     |
| 0.00617156717160513 | -1.31291534        | 1 | 5 | Bpgm       |
| 0.00619391976650937 | 0.825878369453557  | 1 | 5 | Gadd45a    |
| 0.00629428254447158 | -0.426438782428074 | 1 | 5 | Atpif1     |
| 0.00637277728876047 | -0.650197743       | 1 | 5 | Hnmp1      |
| 0.00641489478745356 | 0.268067221631495  | 1 | 5 | Mcm6       |
| 0.00651791091055088 | 0.352130734570279  | 1 | 5 | Angptl4    |
| 0.00654164556578862 | -1.342205757       | 1 | 5 | Sept6      |
| 0.00654291579591653 | 0.348056133117313  | 1 | 5 | Gas1       |
| 0.00654920121008113 | 0.308714886542786  | 1 | 5 | Scarb2     |
| 0.00655754719438258 | -0.623431776718415 | 1 | 5 | Sdc1       |
| 0.00655797213318879 | -1.309308329       | 1 | 5 | Pde3a      |
| 0.00657885692014109 | 0.501679163367057  | 1 | 5 | Psme2b     |
| 0.00662658990723026 | -0.817025722161665 | 1 | 5 | Unc5b      |
| 0.00667029003645534 | -0.252407428412293 | 1 | 5 | Nupr1      |
| 0.00673826904829504 | 0.642466059387503  | 1 | 5 | Dgat1      |
| 0.00675129988580587 | 0.677329841423669  | 1 | 5 | Csf2rb2    |
| 0.0068004888310053  | -0.734657679728324 | 1 | 5 | Myo1d      |
| 0.0068156313987965  | -1.032156512       | 1 | 5 | Akt3       |
| 0.00685978981051664 | 0.948283717485594  | 1 | 5 | E330033B04 |
| 0.00696649018106317 | -1.304162691       | 1 | 5 | Fli1       |
| 0.00704901888065073 | -0.391446504936781 | 1 | 5 | Gtf3c6     |
| 0.00707625551044821 | -0.359936028       | 1 | 5 | Efna5      |
| 0.00707832175000368 | 0.373594154628945  | 1 | 5 | Pmp        |
| 0.00709557237202966 | 0.638186393649523  | 1 | 5 | Antxr1     |
| 0.00710670020295842 | -0.422428579175063 | 1 | 5 | Clk4       |
| 0.00710736092245549 | -0.482314102220765 | 1 | 5 | Myf2       |
| 0.00712242986976204 | -0.833882479712086 | 1 | 5 | S1pr1      |
| 0.00715343571266913 | 0.468963663899081  | 1 | 5 | Rnf19b     |
| 0.00718535229076322 | -0.342348720258813 | 1 | 5 | Pitrm1     |
| 0.00723597463906968 | -0.492285318839241 | 1 | 5 | Hint2      |
| 0.007247045217353   | -1.352446727       | 1 | 5 | Myocd      |
| 0.00726278567419367 | -0.820400342675633 | 1 | 5 | Cep170b    |
| 0.00727254983571688 | 0.729309776935873  | 1 | 5 | Myd88      |
| 0.00729501080479444 | 0.471665364699916  | 1 | 5 | Pid1       |
| 0.00735099728133963 | -0.335868578813967 | 1 | 5 | Gtf2e2     |
| 0.00736698239356465 | 0.650598237840793  | 1 | 5 | Abca6      |
| 0.00737446133567412 | 0.662231021468868  | 1 | 5 | Acly       |
| 0.0074468689288781  | 0.363285834186465  | 1 | 5 | Lonrf3     |
| 0.00745208315293299 | -0.440259363111592 | 1 | 5 | Eno1b      |
| 0.00749181791196859 | 0.415796113107639  | 1 | 5 | Glul       |
| 0.00752843446694476 | 0.518606416314489  | 1 | 5 | Ubfd1      |
| 0.00755764965309855 | -0.710912163091291 | 1 | 5 | Adam10     |
| 0.00768643551132864 | 0.616739292749084  | 1 | 5 | Rnh1       |

|                     |                    |   |   |             |
|---------------------|--------------------|---|---|-------------|
| 0.00769614331443865 | 0.622243647010905  | 1 | 5 | Ibtk        |
| 0.00773786608343661 | 0.560932567291662  | 1 | 5 | 5031426D15f |
| 0.00774631543907339 | 0.441932091140789  | 1 | 5 | Os9         |
| 0.00781769638515446 | -0.563337497549944 | 1 | 5 | Phc3        |
| 0.00784764099251302 | 0.457233548192707  | 1 | 5 | Arl5b       |
| 0.0079569330942229  | -0.871235079219542 | 1 | 5 | Zfp467      |
| 0.00796138535301499 | -0.433244051       | 1 | 5 | Brcc3       |
| 0.00796429224059076 | -1.070252179       | 1 | 5 | Pawr        |
| 0.00797017679011027 | -0.538791130295039 | 1 | 5 | Ezh1        |
| 0.00805689118736812 | -0.51700992        | 1 | 5 | Cnn2        |
| 0.00809220010099469 | 0.329053216941098  | 1 | 5 | Eif5        |
| 0.00820530192638482 | -0.743565368091351 | 1 | 5 | Poldip2     |
| 0.00822557567524235 | -1.305972443       | 1 | 5 | Adcy4       |
| 0.00822887556051268 | 0.366604448421533  | 1 | 5 | Mmp3        |
| 0.00834204984558976 | 0.292549709873304  | 1 | 5 | Atp2b1      |
| 0.00841285248911352 | -0.613908820678491 | 1 | 5 | Dock10      |
| 0.00845193568162557 | 0.507468218898625  | 1 | 5 | Coq10b      |
| 0.00845238436879142 | 0.334775996        | 1 | 5 | Dnajb1      |
| 0.00853637876715864 | 0.370374424404728  | 1 | 5 | Phrf1       |
| 0.00857174907569224 | 0.653241672051542  | 1 | 5 | Sirpa       |
| 0.0085988823944592  | 0.298800166933054  | 1 | 5 | Ppp1r14b    |
| 0.00862466137868416 | 0.352002614728775  | 1 | 5 | Akt2        |
| 0.00863218660923475 | -0.689110782230254 | 1 | 5 | Zc3h14      |
| 0.00863517601332922 | -0.813950749963108 | 1 | 5 | Cx3cl1      |
| 0.00871223912543574 | 0.395317878238018  | 1 | 5 | Plbd2       |
| 0.00882495615234257 | -0.811681219922664 | 1 | 5 | Plvap       |
| 0.00888624352467449 | 0.388939743786034  | 1 | 5 | H2-T23      |
| 0.00888680720224122 | -0.442109447396182 | 1 | 5 | Tmem87b     |
| 0.00898388991249196 | 0.484588965        | 1 | 5 | Negr1       |
| 0.00900710126753423 | 0.858110812643052  | 1 | 5 | Fam46c      |
| 0.00905554816848252 | -0.624719736782707 | 1 | 5 | Agtpbp1     |
| 0.00907673004876003 | -1.238954781       | 1 | 5 | Arl16       |
| 0.00935162515302028 | -0.563627473756869 | 1 | 5 | Zcchc8      |
| 0.00937443101505707 | 0.665208870095198  | 1 | 5 | Cmtm3       |
| 0.00941331993804875 | -0.547750965480309 | 1 | 5 | Txnip       |
| 0.00943601459768289 | 0.266076135354469  | 1 | 5 | Tubb2a      |
| 0.009585488         | 0.622007975391022  | 1 | 5 | Sphk1       |
| 0.00964972416841405 | -1.195392615       | 1 | 5 | Nhs12       |
| 0.00970699590774138 | 0.546227295849797  | 1 | 5 | Mme         |
| 0.00974275600415371 | -1.040674452       | 1 | 5 | Ldb3        |
| 0.00975082618646903 | -0.434628794931147 | 1 | 5 | Dcaf8       |
| 0.00987799397216483 | 0.879042759551186  | 1 | 5 | Ormdl3      |
| 0.0099202164147301  | 0.278733304268023  | 1 | 5 | Nucb2       |
| 0.00997779918823177 | 0.739761021094038  | 1 | 5 | Cxcl5       |

| p_val                | avg_logFC         | p_val_adj            | cluster | gene        |
|----------------------|-------------------|----------------------|---------|-------------|
| 3.07779105716802e-45 | 1.56              | 4.25073722905475e-41 | 6       | Ppp1r14a    |
| 9.61207310769564e-37 | 0.928660812710678 | 1.32752341690384e-32 | 6       | Acta1       |
| 5.82870912487804e-33 | 0.417719521834501 | 8.05003017236906e-29 | 6       | Myl6b       |
| 1.04196632738366e-30 | 1.79              | 1.43905969474957e-26 | 6       | Ramp1       |
| 9.05705573569011e-30 | 0.375826240331055 | 1.25086996765616e-25 | 6       | Actbl2      |
| 1.07766824511582e-29 | 0.896594269001084 | 1.48836761332946e-25 | 6       | Tmsb4x      |
| 2.33202004060107e-28 | -2.58             | 3.22075287807414e-24 | 6       | Ly6e        |
| 5.56014076830855e-27 | 1.62              | 7.67911041511094e-23 | 6       | Asb2        |
| 9.19926646755711e-27 | 1.26              | 1.27051069183431e-22 | 6       | Tpm2        |
| 1.05828457055559e-26 | 1.37              | 1.46159682039433e-22 | 6       | Cnn1        |
| 1.75003172005933e-26 | 0.418223613886452 | 2.41696880857394e-22 | 6       | Actc1       |
| 3.39606387139443e-26 | -1.98             | 4.69030381278285e-22 | 6       | Dcn         |
| 3.63236393477053e-26 | 1.02              | 5.01665783031158e-22 | 6       | Dstn        |
| 4.84608041910274e-26 | 1.52              | 6.6929216668228e-22  | 6       | Efh1        |
| 9.80831871479213e-26 | 1.47              | 1.35462689769994e-21 | 6       | Sh3bgr      |
| 1.09481731344282e-25 | 1.15              | 1.51205219159588e-21 | 6       | Myl9        |
| 1.28721728028138e-25 | 1.18              | 1.77777578579661e-21 | 6       | Itga8       |
| 1.512962580186E-25   | -2.53             | 2.08955261949488e-21 | 6       | Cd34        |
| 1.85897553989903e-25 | 1.19              | 2.56743111815456e-21 | 6       | Tagln       |
| 3.17833520993362e-25 | 0.838659429258325 | 4.38959875843932e-21 | 6       | Flna        |
| 5.35117045246583e-25 | 1.92              | 7.39050151190056e-21 | 6       | E030013I19R |
| 1.53797477039881e-24 | 0.976482293226515 | 2.12409695539779e-20 | 6       | Myh11       |
| 1.62579451218083e-24 | 1.04              | 2.24538480077294e-20 | 6       | Csrp2       |
| 2.25029295694877e-24 | 1.06              | 3.10787960284195e-20 | 6       | Acta2       |
| 2.47025373580012e-24 | 1.08              | 3.41166743451354e-20 | 6       | Smtn        |
| 3.65686056093275e-24 | 1.59              | 5.05049012070422e-20 | 6       | Kcnmb1      |
| 6.17174205856543e-24 | 1.35              | 8.52379295708472e-20 | 6       | Cbr2        |
| 7.8762101242719e-24  | 1.29              | 1.08778338026319e-19 | 6       | Tspan2      |
| 2.7976143320817e-23  | -2.64             | 3.86378515403803e-19 | 6       | Serpinf1    |
| 3.08245246404735e-23 | 1.09              | 4.2571750980958e-19  | 6       | Mylk        |
| 3.13961703219845e-23 | 0.97              | 4.33612508316928e-19 | 6       | Rcan2       |
| 3.63291459289892e-23 | 2.04              | 5.0174183442527e-19  | 6       | 1190005I06R |
| 5.85487339538848e-23 | 1.21              | 8.08616564637102e-19 | 6       | Gm13889     |
| 6.57693200766278e-23 | 1.50              | 9.08340079578307e-19 | 6       | Mustn1      |
| 9.70921006065979e-23 | 1.08              | 1.34093900147772e-18 | 6       | Actn1       |
| 1.03012608050207e-22 | -2.12             | 1.42270712978141e-18 | 6       | Igfbp4      |
| 1.11397206616153e-22 | 1.06              | 1.53850682057569e-18 | 6       | Col18a1     |
| 1.348884532359E-22   | -2.06             | 1.86294442764101e-18 | 6       | Lum         |
| 1.3644127551266e-22  | 1.07              | 1.88439045610535e-18 | 6       | Synpo2      |
| 3.09016869640454e-22 | 1.28              | 4.26783198660431e-18 | 6       | Npnt        |
| 3.48348229951987e-22 | 1.33              | 4.8110374038669e-18  | 6       | Hspb7       |
| 4.11710808676766e-22 | 0.855184669275052 | 5.68613797863482e-18 | 6       | Tpm1        |
| 4.78553203297101e-22 | 0.868670994212233 | 6.60929829073626e-18 | 6       | Sost        |
| 5.18120974379144e-22 | -2.28             | 7.15576877715035e-18 | 6       | Icam1       |
| 5.77759671273113e-22 | 0.849454472993801 | 7.97943881995296e-18 | 6       | Pls3        |
| 8.50434964915796e-22 | 1.69              | 1.17453573004521e-17 | 6       | Sgcg        |
| 2.42253716635569e-21 | -1.90             | 3.34576608045385e-17 | 6       | Mmp2        |
| 2.43321688589974e-21 | 1.06              | 3.36051584111613e-17 | 6       | Mcam        |
| 2.9204857224524e-21  | -2.38             | 4.03348283127901e-17 | 6       | Fbln2       |
| 3.11586245941041e-21 | -2.80             | 4.30331764269171e-17 | 6       | Abca8a      |
| 3.44378769192933e-21 | -2.58             | 4.7562151813236e-17  | 6       | Dpt         |
| 3.59695662992978e-21 | 1.44              | 4.96775680159601e-17 | 6       | Hspb6       |
| 4.7033905392429e-21  | 1.31              | 6.49585267374837e-17 | 6       | Susd5       |
| 5.09126128793609e-21 | -2.09             | 7.03154096476853e-17 | 6       | Ly6a        |
| 6.52929094681748e-21 | -2.21             | 9.01760372664962e-17 | 6       | Emp1        |

|                      |                   |                      |   |             |
|----------------------|-------------------|----------------------|---|-------------|
| 1.84610944761628e-20 | 1.17              | 2.54966175810284e-16 | 6 | Mylk4       |
| 1.93600062803281e-20 | -1.93             | 2.67381046737612e-16 | 6 | C1ra        |
| 1.94842360222274e-20 | -2.17             | 2.69096783702983e-16 | 6 | Vcam1       |
| 1.98036138708898e-20 | 1.11              | 2.73507711170859e-16 | 6 | Dmpk        |
| 3.11102835978469e-20 | -2.30             | 4.29664126769863e-16 | 6 | Pdgfra      |
| 3.44778814406993e-20 | -1.20             | 4.76174020577499e-16 | 6 | Cfh         |
| 4.66424998255893e-20 | -2.72             | 6.44179565091213e-16 | 6 | Cpxm1       |
| 6.60423040343814e-20 | 1.13              | 9.12110261018841e-16 | 6 | Nov         |
| 8.23431531123112e-20 | -2.81             | 1.13724128763413e-15 | 6 | Smoc2       |
| 8.88951661166331e-20 | 1.04              | 1.22773113923682e-15 | 6 | Pdlim3      |
| 9.10659032447378e-20 | 1.07              | 1.25771118971307e-15 | 6 | Ccdc3       |
| 9.5366320100264e-20  | 0.875341867243604 | 1.31710424690475e-15 | 6 | Ncam1       |
| 9.80793241601026e-20 | 0.882864743272134 | 1.35457354597518e-15 | 6 | Myl6        |
| 1.37456506537047e-19 | 0.922212248647594 | 1.89841181178316e-15 | 6 | Dmd         |
| 1.49576941260762e-19 | -2.36             | 2.06580713575239e-15 | 6 | Cygb        |
| 1.75676941745847e-19 | 0.80              | 2.42627424245189e-15 | 6 | Csrp1       |
| 1.75712354953327e-19 | 0.548530687731948 | 2.4267633342604e-15  | 6 | Lgals1      |
| 1.77064024321076e-19 | 0.571183737359971 | 2.44543123989838e-15 | 6 | Cald1       |
| 1.88003772975917e-19 | -1.82             | 2.59652010857039e-15 | 6 | Cp          |
| 2.03577105257377e-19 | -2.54             | 2.81160340070964e-15 | 6 | Entpd2      |
| 2.12554723306717e-19 | 1.48              | 2.93559328358906e-15 | 6 | Pcp4l1      |
| 2.18720549190913e-19 | 0.668257954215111 | 3.0207495048757e-15  | 6 | Myom1       |
| 2.19264474294101e-19 | 1.49              | 3.02826165447583e-15 | 6 | Ptpla       |
| 2.60177106008418e-19 | -2.18             | 3.59330601108227e-15 | 6 | Add3        |
| 2.67301882744402e-19 | -1.75             | 3.69170630258294e-15 | 6 | Slc43a3     |
| 2.68290819592624e-19 | -2.21             | 3.70536450939373e-15 | 6 | Pcolce      |
| 3.76589937493107e-19 | 1.67              | 5.20108362671731e-15 | 6 | Actg2       |
| 4.207197534256E-19   | 1.09              | 5.81056051456096e-15 | 6 | Art3        |
| 4.5348486189319e-19  | -2.25             | 6.26307942760684e-15 | 6 | Ackr3       |
| 4.87560922535728e-19 | 0.93              | 6.73370390114093e-15 | 6 | Lmod1       |
| 5.111117444227E-19   | -1.96             | 7.05896430222191e-15 | 6 | C3          |
| 6.05812450956218e-19 | 0.675635933289407 | 8.36687576015633e-15 | 6 | Lpp         |
| 9.55190857781014e-19 | 1.34              | 1.31921409368136e-14 | 6 | Aoc3        |
| 1.41864272198854e-18 | -2.19             | 1.95928746333838e-14 | 6 | Fbln1       |
| 1.51566549163878e-18 | 1.54              | 2.09328561050232e-14 | 6 | Hspb2       |
| 1.58588585288379e-18 | 1.44              | 2.1902669514178e-14  | 6 | Fgf1        |
| 2.58979697286331e-18 | -2.64             | 3.57676859922152e-14 | 6 | Tgfb1       |
| 3.21999223785832e-18 | -2.19             | 4.44713127970613e-14 | 6 | Cxcl1       |
| 4.64587705949159e-18 | 1.16              | 6.41642080686384e-14 | 6 | Pdlim1      |
| 5.01288002882412e-18 | 0.901733812087025 | 6.923288607809E-14   | 6 | Tns1        |
| 6.30134023457583e-18 | 1.36              | 8.70278099797268e-14 | 6 | Map3k7cl    |
| 8.80355326493606e-18 | -2.56             | 1.21585874142032e-13 | 6 | Il33        |
| 1.03306026949887e-17 | -2.19             | 1.42675953820489e-13 | 6 | Serpina3n   |
| 1.07628035043713e-17 | 1.34              | 1.48645079198872e-13 | 6 | Spint2      |
| 1.10640119072781e-17 | 0.414243194885015 | 1.52805068451418e-13 | 6 | NP-904328.1 |
| 1.228966136059E-17   | -2.44             | 1.69732513051109e-13 | 6 | Sfrp1       |
| 2.874567303568E-17   | 0.98              | 3.97006490295776e-13 | 6 | Postn       |
| 2.8922757607856e-17  | 2.02              | 3.99452205322099e-13 | 6 | Slc22a1     |
| 3.81516546025949e-17 | 0.897460251690616 | 5.26912501716439e-13 | 6 | Ppp1cb      |
| 3.99285592310945e-17 | 1.19              | 5.51453331540645e-13 | 6 | Lims2       |
| 4.39480233411666e-17 | 0.69              | 6.06966150364852e-13 | 6 | Serpine2    |
| 6.0307726740523e-17  | 0.361422147712788 | 8.32910014013363e-13 | 6 | Vim         |
| 7.1337061309166e-17  | -2.22             | 9.85236153740891e-13 | 6 | Gpx3        |
| 8.80925215095095e-17 | 0.879383600774532 | 1.21664581456784e-12 | 6 | Plekho1     |
| 8.96534972216865e-17 | 1.87              | 1.23820445012871e-12 | 6 | Rasgrp2     |
| 1.03347033160343e-16 | 0.756095662458108 | 1.4273258749775e-12  | 6 | Enah        |

|                      |                    |                      |   |             |
|----------------------|--------------------|----------------------|---|-------------|
| 1.07071165165825e-16 | -1.60              | 1.47875986210521e-12 | 6 | Bhlhe40     |
| 1.13718214883564e-16 | -1.80              | 1.5705622657569e-12  | 6 | Col14a1     |
| 1.14100866501095e-16 | 0.401482722594687  | 1.57584706724663e-12 | 6 | Fth1        |
| 1.19844936794471e-16 | 1.24               | 1.65517842206844e-12 | 6 | Ras12       |
| 1.58256042642773e-16 | 0.372662907388705  | 2.18567420493934e-12 | 6 | NP-904340.1 |
| 1.90712483153094e-16 | 1.14               | 2.63393010482738e-12 | 6 | Pgm5        |
| 1.90759702996947e-16 | -1.45              | 2.63458225809083e-12 | 6 | Rnase4      |
| 2.7144143597719e-16  | -1.50              | 3.74887767228097e-12 | 6 | Serping1    |
| 3.08439171162607e-16 | -2.51              | 4.25985339292676e-12 | 6 | Dpep1       |
| 3.14838980691261e-16 | 0.707125256853968  | 4.34824116232701e-12 | 6 | Oxct1       |
| 3.4454667053441e-16  | 0.812793637131805  | 4.75853406675073e-12 | 6 | Pbxip1      |
| 4.41858132932701e-16 | -2.51              | 6.10250267393354e-12 | 6 | Cfb         |
| 4.49759421112614e-16 | 0.770801018746929  | 6.21162736498632e-12 | 6 | Ptgis       |
| 4.65166496377936e-16 | 0.639741116338547  | 6.42441448147568e-12 | 6 | Bcam        |
| 6.35926399411982e-16 | 1.10               | 8.78277950227888e-12 | 6 | Thsd4       |
| 6.78530545043949e-16 | 0.742777019953332  | 9.37118535760197e-12 | 6 | Cox6c       |
| 7.0030017420671e-16  | -2.14              | 9.67184570596888e-12 | 6 | Marcks      |
| 7.34494992614337e-16 | -1.84              | 1.01441103429966e-11 | 6 | Tmem176b    |
| 8.06754514212056e-16 | -2.26              | 1.11420865957827e-11 | 6 | C4b         |
| 8.46450647557204e-16 | 0.628666320678509  | 1.16903298934125e-11 | 6 | Map1b       |
| 8.48808842216681e-16 | 0.966655732832878  | 1.17228989198546e-11 | 6 | Cryab       |
| 8.85542045566649e-16 | 0.800573324605422  | 1.2230221191321e-11  | 6 | Slmap       |
| 9.71989553932655e-16 | 0.567018289016532  | 1.34241477293639e-11 | 6 | Kcnab1      |
| 9.98972510516768e-16 | -2.41              | 1.37968093427471e-11 | 6 | Igf1        |
| 1.10277955130989e-15 | 1.25               | 1.52304883831409e-11 | 6 | Serpini1    |
| 1.15467776304387e-15 | 0.98               | 1.59472545853989e-11 | 6 | Higd1a      |
| 1.19606343137175e-15 | 1.27               | 1.65188320506753e-11 | 6 | Gucy1b3     |
| 1.37563032078714e-15 | -1.55              | 1.89988303603912e-11 | 6 | Mgst1       |
| 1.59812354348942e-15 | 1.55               | 2.20716842591324e-11 | 6 | Glipr1      |
| 2.01458752535865e-15 | 0.490230135208725  | 2.78234683127284e-11 | 6 | Itgb1       |
| 2.14614623538767e-15 | 1.31               | 2.96404256569391e-11 | 6 | Fbxo30      |
| 2.20237544868794e-15 | 1.47               | 3.04170073218291e-11 | 6 | Cap2        |
| 2.22199076431092e-15 | -2.41              | 3.06879144458981e-11 | 6 | Ramp2       |
| 2.63057297747304e-15 | -2.53              | 3.63308433918801e-11 | 6 | Gda         |
| 2.64673638201313e-15 | 0.557820193239123  | 3.65540761719833e-11 | 6 | Cpe         |
| 3.00557739146514e-15 | 0.701840360995886  | 4.1510029353525e-11  | 6 | Sh3bgrl     |
| 3.50738439945304e-15 | -1.28              | 4.8440485940846e-11  | 6 | Gsn         |
| 3.94589352190794e-15 | -2.37              | 5.44967354310706e-11 | 6 | Scn7a       |
| 3.99520921542381e-15 | -2.39              | 5.51778344742182e-11 | 6 | Pi16        |
| 4.27860597624011e-15 | -0.926124189057958 | 5.90918271378522e-11 | 6 | Ifitm3      |
| 5.12743157052863e-15 | 1.20               | 7.0814957420571e-11  | 6 | 6330403A02F |
| 5.58686052844066e-15 | -1.78              | 7.7160130758294e-11  | 6 | Nid1        |
| 5.8247928226594e-15  | 0.725959983908335  | 8.04462136737489e-11 | 6 | Slc25a4     |
| 7.93732522821363e-15 | 0.81               | 1.09622398726858e-10 | 6 | Vcl         |
| 1.10136544963477e-14 | -2.49              | 1.52109582249058e-10 | 6 | Efemp1      |
| 1.44646979631519e-14 | 1.03               | 1.99771943569091e-10 | 6 | Samd4       |
| 1.53081779000875e-14 | 0.89               | 2.11421244978109e-10 | 6 | Msrp1       |
| 1.87583491623716e-14 | -2.40              | 2.59071560281515e-10 | 6 | Bmp4        |
| 2.23317630221118e-14 | 1.12               | 3.08423979098386e-10 | 6 | Cspg4       |
| 2.45949069536119e-14 | -1.96              | 3.39680259936334e-10 | 6 | Pltp        |
| 2.91563611416851e-14 | -1.76              | 4.02678503727813e-10 | 6 | C1s1        |
| 2.9537442748211e-14  | 0.954602925175644  | 4.07941621795543e-10 | 6 | Pdcl3       |
| 5.03054365738831e-14 | -1.65              | 6.947683845219E-10   | 6 | Lima1       |
| 5.07870891141465e-14 | -2.11              | 7.01420487755477e-10 | 6 | Bicc1       |
| 6.24126911282973e-14 | 1.06               | 8.61981677172914e-10 | 6 | Perp        |
| 6.45601674335089e-14 | 2.00               | 8.91640472424191e-10 | 6 | Fbxl22      |



|                      |                   |                      |   |             |
|----------------------|-------------------|----------------------|---|-------------|
| 6.9141700147596e-14  | -2.19             | 9.54916020738449e-10 | 6 | Clec3b      |
| 7.15388831766338e-14 | -1.39             | 9.88023515552489e-10 | 6 | Adamts2     |
| 7.79677329856956e-14 | -1.45             | 1.07681236026544e-09 | 6 | Meg3        |
| 8.06823819956257e-14 | 0.952111066319227 | 1.11430437774159e-09 | 6 | Kank1       |
| 8.25211145784155e-14 | 0.363220926375075 | 1.1396991134425e-09  | 6 | NP-904329.1 |
| 9.36046719477239e-14 | 0.859242180920342 | 1.29277412427002e-09 | 6 | Entpd1      |
| 9.50449449870948e-14 | -1.58             | 1.31266573521677e-09 | 6 | Litaf       |
| 9.69577972723009e-14 | -1.87             | 1.33908413812775e-09 | 6 | Mmp3        |
| 9.8812044019201e-14  | 0.597922198447254 | 1.36469313994919e-09 | 6 | Rock1       |
| 1.13768091300427e-13 | 0.659475140390087 | 1.5712511089502e-09  | 6 | Myh10       |
| 1.25577810456842e-13 | 0.728559269227465 | 1.73435514021945e-09 | 6 | Pkp4        |
| 1.32356014901069e-13 | 0.530039066137373 | 1.82796892179866e-09 | 6 | Fblim1      |
| 1.40690234410715e-13 | 0.546804985127935 | 1.94307282744639e-09 | 6 | Aplp2       |
| 1.50544326739981e-13 | 0.525085684553908 | 2.07916769660587e-09 | 6 | Cox4i1      |
| 1.61793523485187e-13 | 0.844635008424626 | 2.23453035285391e-09 | 6 | Nox4        |
| 1.83323113116741e-13 | 0.775715338239421 | 2.53187551525531e-09 | 6 | Rbpms       |
| 1.85018419861846e-13 | -1.45             | 2.55528939671195e-09 | 6 | Ablim1      |
| 2.5141947146326e-13  | -1.24             | 3.47235432037909e-09 | 6 | Nrp1        |
| 2.68875003605126e-13 | -1.97             | 3.71343267479039e-09 | 6 | Gfpt2       |
| 2.72952738695183e-13 | 0.698034888355654 | 3.76975027411917e-09 | 6 | Itga9       |
| 2.81643290402805e-13 | -2.20             | 3.88977548375313e-09 | 6 | C7          |
| 3.09742278003784e-13 | -2.06             | 4.27785060151027e-09 | 6 | Ifi2l2a     |
| 3.7099744391087e-13  | -1.78             | 5.12384569785303e-09 | 6 | Olfml3      |
| 3.82497606992401e-13 | 1.48              | 5.28267445017205e-09 | 6 | Anln        |
| 3.95532511211491e-13 | -2.35             | 5.46269951234190e-09 | 6 | Dio2        |
| 4.20944790911688e-13 | 1.70              | 5.81366850728132e-09 | 6 | Gm11627     |
| 4.29911204153001e-13 | -2.28             | 5.9375036405571e-09  | 6 | Fxyd6       |
| 4.41283368296358e-13 | 0.868464181484983 | 6.09456459954099e-09 | 6 | Mrv1        |
| 4.4768304866315e-13  | -1.92             | 6.18295058508676e-09 | 6 | Thbd        |
| 4.54903904011308e-13 | 0.782057338518803 | 6.28267781830017e-09 | 6 | Cped1       |
| 4.5930405545881e-13  | 1.04              | 6.34344830994163e-09 | 6 | Itih4       |
| 5.287620866754E-13   | 0.390358509992695 | 7.30273317907395e-09 | 6 | Igfbp7      |
| 5.44696306637386e-13 | 0.607853650728102 | 7.52280069096894e-09 | 6 | Pfn1        |
| 5.93422043155943e-13 | 0.379877501741296 | 8.19575183802673e-09 | 6 | NP-904337.1 |
| 6.26328023896515e-13 | -2.33             | 8.65021633803476e-09 | 6 | Ctsk        |
| 6.3453477651413e-13  | 0.697712388157855 | 8.76355979843665e-09 | 6 | Nexn        |
| 7.57747757219949e-13 | 0.261122417752583 | 1.04652542749647e-08 | 6 | Actb        |
| 7.8313582697623e-13  | 0.711808852823328 | 1.08158889063687e-08 | 6 | Ndufa6      |
| 9.3781014554039e-13  | 0.872784793513503 | 1.29520959200583e-08 | 6 | 2310022B05f |
| 9.42820158741214e-13 | -2.63             | 1.30212892123749e-08 | 6 | Scara5      |
| 1.04924082937203e-12 | 0.411452095528131 | 1.44910650944572e-08 | 6 | Fbxo32      |
| 1.10214223936659e-12 | 0.696692886586295 | 1.5221686467892e-08  | 6 | Uqcr10      |
| 1.11862566767E-12    | 0.547742690921083 | 1.54493390961904e-08 | 6 | Ogn         |
| 1.17026352635026e-12 | 0.691701658324571 | 1.61625095624234e-08 | 6 | Fxyd1       |
| 1.26458101970821e-12 | 0.497143160281753 | 1.746512846319E-08   | 6 | Fhl1        |
| 1.27359797145597e-12 | 1.15              | 1.75896615837784e-08 | 6 | Suc1g2      |
| 1.33109112132161e-12 | 1.23              | 1.83836994765727e-08 | 6 | Acsl1       |
| 1.40748758669645e-12 | 1.32              | 1.94388110598647e-08 | 6 | Kcnh2       |
| 1.69674607972955e-12 | -1.72             | 2.34337601071448e-08 | 6 | Lpl         |
| 1.77442240334892e-12 | 0.742144246451178 | 2.45065478126519e-08 | 6 | Lrrfip1     |
| 1.85793251183889e-12 | 0.849535631904789 | 2.5659905921007e-08  | 6 | Dsp         |
| 2.30442308847862e-12 | -1.53             | 3.18263872749782e-08 | 6 | Timp1       |
| 2.42954246728065e-12 | -1.68             | 3.3554411015613e-08  | 6 | Phlda1      |
| 2.44473579419895e-12 | -1.75             | 3.37642460536817e-08 | 6 | Clec11a     |
| 2.47064752215341e-12 | 0.604475447988136 | 3.41221129284608e-08 | 6 | Zyx         |
| 2.52326487767696e-12 | -2.00             | 3.48488112255965e-08 | 6 | Akap12      |

|                      |                    |                      |   |             |
|----------------------|--------------------|----------------------|---|-------------|
| 2.58121582962519e-12 | -1.23              | 3.56491718229535e-08 | 6 | Ppap2b      |
| 2.8069627006394e-12  | 0.447448795763079  | 3.87669618585307e-08 | 6 | Ptrf        |
| 2.83939504472753e-12 | 0.683958841893197  | 3.92148849627319e-08 | 6 | Cav1        |
| 2.97079869711819e-12 | 1.10               | 4.10297008058994e-08 | 6 | 1700120C14f |
| 3.13025476924415e-12 | 0.845473682515187  | 4.3231948618031e-08  | 6 | Rras        |
| 3.40907132694961e-12 | -2.18              | 4.70826840965011e-08 | 6 | Bace2       |
| 3.52680783891519e-12 | 0.835133597962525  | 4.87087430632578e-08 | 6 | Itga3       |
| 3.57946050231864e-12 | 0.847241842237309  | 4.94359289975228e-08 | 6 | Zak         |
| 3.60872159013456e-12 | 0.549910599350201  | 4.98400538813485e-08 | 6 | Ppp1r12a    |
| 3.79656207190724e-12 | -0.945891750294651 | 5.24343187751109e-08 | 6 | H2-D1       |
| 4.48169130876015e-12 | 0.796674044806344  | 6.18966386652864e-08 | 6 | Msrp3       |
| 4.4950044384205e-12  | 0.934551931851081  | 6.20805062990255e-08 | 6 | Usmg5       |
| 4.8841669844909e-12  | 0.851170670163703  | 6.74552302228038e-08 | 6 | Marvel1     |
| 4.98750579202825e-12 | -1.90              | 6.88824424937022e-08 | 6 | Lgals9      |
| 5.057132790535E-12   | -2.00              | 6.98440609700789e-08 | 6 | Lpar1       |
| 5.07389602031271e-12 | -1.30              | 7.00755779365388e-08 | 6 | Cyp1b1      |
| 5.17541406925348e-12 | 1.08               | 7.14776437104599e-08 | 6 | Stk38l      |
| 5.23105285563823e-12 | -2.18              | 7.22460709892196e-08 | 6 | Acvrl1      |
| 5.42751043681453e-12 | -1.94              | 7.49593466428454e-08 | 6 | Spon1       |
| 5.97673291753156e-12 | 0.758779653649457  | 8.25446583240284e-08 | 6 | Mark1       |
| 6.07556866980645e-12 | -1.25              | 8.39096788986969e-08 | 6 | Cxcl12      |
| 6.42015076423953e-12 | 0.70               | 8.86687022049122e-08 | 6 | Atp5j2      |
| 6.43754399614123e-12 | -1.00              | 8.89089201307065e-08 | 6 | Ccdc80      |
| 6.83600254333613e-12 | 0.733505297936637  | 9.44120311260153e-08 | 6 | Uqcrb       |
| 6.84026646883104e-12 | 0.796420242519164  | 9.44709202010254e-08 | 6 | Tmem38b     |
| 7.38344995639512e-12 | -2.03              | 1.01972827347773e-07 | 6 | Dnm1        |
| 8.21290129111223e-12 | 0.865722906363164  | 1.13428379731551e-07 | 6 | Hcfc1r1     |
| 8.54847716583562e-12 | 0.966422679037745  | 1.18063018137356e-07 | 6 | Rassf3      |
| 9.7714019554846e-12  | 0.930872483422915  | 1.34952832407198e-07 | 6 | Rbpms2      |
| 1.06252565279143e-11 | -2.01              | 1.46745417907025e-07 | 6 | Ly6c1       |
| 1.06984315924365e-11 | -1.73              | 1.47756038723141e-07 | 6 | Kcnq1ot1    |
| 1.18381900527143e-11 | -1.53              | 1.63497242818038e-07 | 6 | Irf1        |
| 1.24792811268581e-11 | -1.65              | 1.72351351643037e-07 | 6 | Lgals3bp    |
| 1.25780078201293e-11 | -2.06              | 1.73714866003806e-07 | 6 | Comp        |
| 1.30219572590447e-11 | -2.36              | 1.79846251704666e-07 | 6 | Igfbp6      |
| 1.35985299066503e-11 | -1.75              | 1.87809296540748e-07 | 6 | Sfn5        |
| 1.37391712740522e-11 | -2.14              | 1.89751694465934e-07 | 6 | Tnfaip3     |
| 1.45184146734738e-11 | -0.91              | 2.00513825055347e-07 | 6 | Col1a1      |
| 1.51096806785428e-11 | 0.781477796340889  | 2.08679799851354e-07 | 6 | Capzb       |
| 1.77761436529221e-11 | 0.79               | 2.45506319990508e-07 | 6 | Lmcd1       |
| 1.96813848403582e-11 | -1.34              | 2.71819606030187e-07 | 6 | Cebpd       |
| 2.23977395756427e-11 | -1.98              | 3.09335181279201e-07 | 6 | Cmip        |
| 2.54051112949087e-11 | -1.28              | 3.50869992093984e-07 | 6 | Osmr        |
| 2.67042239879717e-11 | 0.909492065415077  | 3.68812037497878e-07 | 6 | Adck3       |
| 2.79459846699692e-11 | 1.00               | 3.85961994276944e-07 | 6 | Osbpl3      |
| 2.80548073141663e-11 | 0.780814470724216  | 3.87464943815951e-07 | 6 | Rsu1        |
| 2.88660614942104e-11 | -2.06              | 3.9866917529654e-07  | 6 | SrpX        |
| 2.92923722667788e-11 | 0.900497888567831  | 4.04556953376482e-07 | 6 | Plin4       |
| 3.27205939579286e-11 | 0.88               | 4.51904123152952e-07 | 6 | Snhg18      |
| 3.34621914826667e-11 | 0.80               | 4.6214632656711e-07  | 6 | Speg        |
| 3.53030578807344e-11 | 0.698517326284632  | 4.87570532390823e-07 | 6 | Atp5g3      |
| 3.94884057280228e-11 | -1.85              | 5.45374371509722e-07 | 6 | Trf         |
| 4.38988889709084e-11 | 0.628238939804421  | 6.06287555577216e-07 | 6 | Cox8a       |
| 4.51146514362558e-11 | 0.952425465830864  | 6.23078450986129e-07 | 6 | Pcdh7       |
| 4.53936286004706e-11 | -1.86              | 6.26931404601099e-07 | 6 | Prg4        |
| 4.78640900563335e-11 | 0.875689537607548  | 6.61050947768022e-07 | 6 | Tgfb1i1     |

|                      |                    |                      |   |           |
|----------------------|--------------------|----------------------|---|-----------|
| 4.79287269018815e-11 | 0.762001369770112  | 6.61943647241885e-07 | 6 | Wfdc1     |
| 4.93095153662777e-11 | 0.78               | 6.81013716723661e-07 | 6 | Ndufa11   |
| 5.04405892735011e-11 | 1.31               | 6.96634978456323e-07 | 6 | Mmp17     |
| 5.17871090012341e-11 | -2.28              | 7.15231762416044e-07 | 6 | Aldh1a1   |
| 5.20351357277069e-11 | -1.35              | 7.1865725953536e-07  | 6 | Pcolce2   |
| 5.21856713362691e-11 | -2.08              | 7.20736306825213e-07 | 6 | Ms4a4d    |
| 5.60408667818101e-11 | -2.15              | 7.73980411123579e-07 | 6 | Gpm6b     |
| 6.13374394276514e-11 | 0.437134955498801  | 8.47131375935294e-07 | 6 | S100a6    |
| 6.33827454264991e-11 | -0.90              | 8.75379097085379e-07 | 6 | Nfkbia    |
| 6.74900552418928e-11 | -1.88              | 9.32105152945781e-07 | 6 | H2-T23    |
| 6.94408091638949e-11 | 1.05               | 9.59047015362552e-07 | 6 | Gpsm2     |
| 7.0853307047605e-11  | -2.12              | 9.78555023634473e-07 | 6 | Steap4    |
| 7.49830001053725e-11 | 0.66               | 1.0355902144553e-06  | 6 | Dynll1    |
| 7.59813735524237e-11 | 1.56               | 1.04937875013252e-06 | 6 | Kcnma1    |
| 8.88032969449935e-11 | 0.794619660226745  | 1.22646233410731e-06 | 6 | Cox7c     |
| 8.91226319670158e-11 | 0.575216164550529  | 1.23087267009645e-06 | 6 | Gm12338   |
| 9.15198386409422e-11 | -1.34              | 1.26398049147005e-06 | 6 | Csf1      |
| 1.01160366953714e-10 | 1.05               | 1.39712582799774e-06 | 6 | Fabp4     |
| 1.07218078939337e-10 | 0.708614039038272  | 1.48078888823118e-06 | 6 | Unc5c     |
| 1.13809550514937e-10 | 1.16               | 1.57182370216179e-06 | 6 | Dtna      |
| 1.16008785028278e-10 | -1.16              | 1.60219733002555e-06 | 6 | Sash1     |
| 1.17529872699714e-10 | 0.869769680285986  | 1.62320507185576e-06 | 6 | Hdac9     |
| 1.27166847233981e-10 | 0.539146562882773  | 1.75630132714851e-06 | 6 | Cd200     |
| 1.34190502683444e-10 | 1.51               | 1.85330503256104e-06 | 6 | Sytl5     |
| 1.39744233583484e-10 | 0.98               | 1.93000761002149e-06 | 6 | St5       |
| 1.40462669259147e-10 | 0.389845263715908  | 1.93992992513808e-06 | 6 | Nupr1     |
| 1.40713196110334e-10 | 1.00               | 1.94338995147982e-06 | 6 | Fgf13     |
| 1.41059438934078e-10 | -0.70              | 1.94817191111856e-06 | 6 | Timp2     |
| 1.45493493108751e-10 | 0.837694418824198  | 2.00941063332496e-06 | 6 | Pkdcc     |
| 1.57344314477271e-10 | -1.10              | 2.17308232724559e-06 | 6 | Ccnl1     |
| 1.59941557541082e-10 | 0.917649312956293  | 2.20895285119989e-06 | 6 | Pde4dip   |
| 1.70513550563736e-10 | -1.85              | 2.35496264683576e-06 | 6 | Cytl1     |
| 1.75608305532579e-10 | 0.57               | 2.42532630771045e-06 | 6 | Rpl7      |
| 1.80905202682821e-10 | 0.979798134000582  | 2.49848175425244e-06 | 6 | Neo1      |
| 1.94592447579312e-10 | 0.531398665718754  | 2.68751629351788e-06 | 6 | Rpl14-ps1 |
| 1.96791044622357e-10 | 0.68               | 2.71788111727937e-06 | 6 | Anapc11   |
| 2.17146489604538e-10 | 1.14               | 2.99901016792827e-06 | 6 | Bcar3     |
| 2.18548606492412e-10 | 0.694003076307039  | 3.01837480426671e-06 | 6 | Hspb1     |
| 2.24650131913742e-10 | 0.571727237264887  | 3.10264297186069e-06 | 6 | Atp5j     |
| 2.26459763653894e-10 | 0.678463361370673  | 3.12763579582393e-06 | 6 | Tln1      |
| 2.31898773990602e-10 | 1.11               | 3.20275396758421e-06 | 6 | Tnk2      |
| 2.33393314407022e-10 | 1.06               | 3.22339506527538e-06 | 6 | Pawr      |
| 2.56272793083463e-10 | -0.970942953937302 | 3.53938354527571e-06 | 6 | Nav1      |
| 2.7916498859101e-10  | 0.47               | 3.85554765743044e-06 | 6 | Clic4     |
| 2.83255364577264e-10 | -2.35              | 3.91203984017659e-06 | 6 | Inmt      |
| 2.85090804913893e-10 | 0.952396181130109  | 3.93738910666577e-06 | 6 | Tes       |
| 2.90824847983767e-10 | -1.67              | 4.01658197550381e-06 | 6 | Medag     |
| 3.01485842643586e-10 | 0.539659215895717  | 4.16382097275057e-06 | 6 | Utn       |
| 3.21202497897944e-10 | 0.945726574891884  | 4.43612769846851e-06 | 6 | Nop10     |
| 3.27795845345243e-10 | -2.33              | 4.52718842006315e-06 | 6 | Cpxm2     |
| 3.28817824177717e-10 | 1.34               | 4.54130296971845e-06 | 6 | Phft2     |
| 3.38065188226793e-10 | -2.23              | 4.66901831460024e-06 | 6 | Hsd11b1   |
| 3.38844876886719e-10 | -1.20              | 4.67978659468248e-06 | 6 | Adamts5   |
| 3.66151890958312e-10 | -1.65              | 5.05692376602524e-06 | 6 | Slc16a2   |
| 3.79109609602425e-10 | 0.48               | 5.23588281821909e-06 | 6 | Calm2     |
| 3.79131559159151e-10 | 0.559198053089864  | 5.23618596354703e-06 | 6 | Mfge8     |

|                      |                    |                      |   |           |
|----------------------|--------------------|----------------------|---|-----------|
| 3.82474453985172e-10 | -2.44              | 5.2823546839892e-06  | 6 | Fmod      |
| 3.90548914627914e-10 | -1.47              | 5.39387105992612e-06 | 6 | Uap1      |
| 3.90993772242427e-10 | -0.969884113567996 | 5.40001498844016e-06 | 6 | Tcf4      |
| 4.00418186619934e-10 | -1.93              | 5.53017557540791e-06 | 6 | Bst2      |
| 4.05537029037683e-10 | 0.497738056772211  | 5.60087190803944e-06 | 6 | Net1      |
| 4.29858150456804e-10 | 0.77               | 5.93677091595892e-06 | 6 | Fat1      |
| 4.42225874688687e-10 | 0.561622767189435  | 6.10758155532545e-06 | 6 | Rgs4      |
| 4.59988951556482e-10 | 0.494105032313182  | 6.35290740994657e-06 | 6 | Limch1    |
| 4.90065839010754e-10 | -2.10              | 6.76829930257752e-06 | 6 | Gpnmb     |
| 4.95148789818991e-10 | 1.27               | 6.83849993619008e-06 | 6 | Sgca      |
| 5.27595080919573e-10 | 0.777864460258767  | 7.28661566258022e-06 | 6 | Wwp2      |
| 5.46902025781135e-10 | -2.22              | 7.55326387806326e-06 | 6 | Apod      |
| 5.70558942058401e-10 | 0.40               | 7.87998954876858e-06 | 6 | Mbnl1     |
| 5.71622267156358e-10 | -1.98              | 7.89467513169646e-06 | 6 | Svep1     |
| 5.83579987780054e-10 | 0.417021220406283  | 8.05982321123033e-06 | 6 | Actn4     |
| 5.96985892608132e-10 | -1.19              | 8.24497216281091e-06 | 6 | Fxyd5     |
| 6.57050044641069e-10 | 0.591221139370595  | 9.0745181665378e-06  | 6 | Rgs7bp    |
| 6.91470096711702e-10 | 0.834975413787392  | 9.54989350568532e-06 | 6 | Col4a6    |
| 7.17932009055906e-10 | 0.335085046527152  | 9.91535897707111e-06 | 6 | Gm13826   |
| 7.29222066862334e-10 | 0.751967075166303  | 1.00712859654357e-05 | 6 | Mef2c     |
| 7.35720885650112e-10 | -1.32              | 1.01610411517137e-05 | 6 | Ifnar2    |
| 7.3605186914967e-10  | -1.51              | 1.01656123648261e-05 | 6 | Gas1      |
| 7.60784574439298e-10 | 0.661955556062916  | 1.05071957575811e-05 | 6 | Pdlim7    |
| 8.16863176296919e-10 | -1.08              | 1.12816973278368e-05 | 6 | Stat3     |
| 8.28357077900398e-10 | 0.490484454757633  | 1.14404396028824e-05 | 6 | Cox6b1    |
| 8.4740902351893e-10  | 0.759336066319671  | 1.17035660238199e-05 | 6 | Sema3c    |
| 9.19517626580689e-10 | -1.93              | 1.26994579407059e-05 | 6 | Gdf10     |
| 9.62376888537643e-10 | 0.457062505412142  | 1.32913872075934e-05 | 6 | Rpl14     |
| 9.67697957649219e-10 | 0.798687751426736  | 1.33648764930934e-05 | 6 | Ldhb      |
| 1.02880034422727e-09 | 0.302121304901511  | 1.42087615541228e-05 | 6 | Gpx1      |
| 1.04226789646034e-09 | 0.81               | 1.43947619180137e-05 | 6 | Rrad      |
| 1.06669995387534e-09 | 0.648933637684937  | 1.47321930629723e-05 | 6 | Mtss1l    |
| 1.08451446002764e-09 | -1.79              | 1.49782292074417e-05 | 6 | Xdh       |
| 1.10675405147849e-09 | 0.737886120205665  | 1.52853802049695e-05 | 6 | Rpl10a    |
| 1.14843986536623e-09 | 0.450879966190412  | 1.5861102980573e-05  | 6 | Gstm1     |
| 1.28027568023255e-09 | -1.29              | 1.76818874196918e-05 | 6 | Lama2     |
| 1.33126524749218e-09 | -0.857899847855367 | 1.83861043331145e-05 | 6 | Fuca1     |
| 1.34291273525349e-09 | -1.29              | 1.85469677865859e-05 | 6 | Jam2      |
| 1.37953538600201e-09 | 1.38               | 1.90527632160738e-05 | 6 | Ldb3      |
| 1.52980404312285e-09 | 0.708245180595902  | 2.11281236395697e-05 | 6 | Atp5g1    |
| 1.58429807367471e-09 | 0.608783136104533  | 2.18807406955214e-05 | 6 | Ndufc1    |
| 1.68714136970522e-09 | 0.58               | 2.33011094569988e-05 | 6 | Ndufa4    |
| 1.69102273770198e-09 | -1.56              | 2.33547150304021e-05 | 6 | Dab2      |
| 1.71133866875722e-09 | -1.35              | 2.36352983542059e-05 | 6 | Sfrp2     |
| 1.7272568292087e-09  | 0.92               | 2.38551440682014e-05 | 6 | Smarcd3   |
| 1.73355701047407e-09 | 1.07               | 2.39421558716574e-05 | 6 | Tnc       |
| 1.73699736136071e-09 | 0.641643434803589  | 2.39896705577527e-05 | 6 | Atp5l     |
| 1.8184170651143e-09  | -1.03              | 2.51141580862936e-05 | 6 | Tgfb2     |
| 2.0348082394195e-09  | 1.09               | 2.81027365946228e-05 | 6 | Tnfrsf11a |
| 2.04051454781111e-09 | 1.17               | 2.81815464198193e-05 | 6 | Ttll7     |
| 2.13736792707571e-09 | -0.821601193558883 | 2.95191884408426e-05 | 6 | Ctsl      |
| 2.25116039363188e-09 | -0.963790354778789 | 3.109077619645E-05   | 6 | Ace       |
| 2.32602945515245e-09 | -1.42              | 3.21247928051105e-05 | 6 | Ece1      |
| 2.41645650185322e-09 | 1.23               | 3.33736807470948e-05 | 6 | Emb       |
| 2.50844131421912e-09 | -1.53              | 3.46440829906803e-05 | 6 | Fam102b   |
| 2.65039074288488e-09 | 0.458618886791551  | 3.66045465499831e-05 | 6 | Crip1     |



|                      |                    |                      |   |             |
|----------------------|--------------------|----------------------|---|-------------|
| 2.70737283289417e-09 | 0.91               | 3.73915261951014e-05 | 6 | Grip2       |
| 2.7082048490017e-09  | 0.44               | 3.74030171695624e-05 | 6 | S100a11     |
| 2.73615665668902e-09 | -1.97              | 3.77890595855321e-05 | 6 | Mdk         |
| 2.804337953799E-09   | 1.52               | 3.8730711479918e-05  | 6 | Tcap        |
| 2.91121086318291e-09 | 0.829706349263335  | 4.02067332314192e-05 | 6 | Dynlt3      |
| 2.94090837023078e-09 | -0.956512171266531 | 4.06168855012574e-05 | 6 | H2-K1       |
| 2.95789194002334e-09 | 0.636214454352431  | 4.08514455836623e-05 | 6 | Atp6v0e     |
| 3.58504315230029e-09 | 0.658686812704972  | 4.95130309764194e-05 | 6 | Mtus2       |
| 3.72883908749716e-09 | 0.68               | 5.14989966374233e-05 | 6 | Jph2        |
| 3.80436981275867e-09 | -1.92              | 5.254215148401E-05   | 6 | Fndc1       |
| 3.84825137886654e-09 | -1.43              | 5.31481997935257e-05 | 6 | Boc         |
| 4.01807922988776e-09 | -1.75              | 5.54936922439799e-05 | 6 | Fmo1        |
| 4.07105488582203e-09 | -1.55              | 5.62253390280881e-05 | 6 | Tcn2        |
| 4.51098300579024e-09 | -0.665707582476203 | 6.2301186292969e-05  | 6 | Sptbn1      |
| 5.01880621675041e-09 | 0.447961952502581  | 6.93147326595399e-05 | 6 | Arpc2       |
| 5.24489442038133e-09 | 0.479744247786736  | 7.24372368398865e-05 | 6 | Fermt2      |
| 5.3279138317506e-09  | -0.40              | 7.35838179303075e-05 | 6 | Malat1      |
| 5.36648633255119e-09 | -1.07              | 7.41165427388644e-05 | 6 | Abi3bp      |
| 6.06764920957268e-09 | 0.830208531616006  | 8.38003032334083e-05 | 6 | Itgb3       |
| 6.27098653769374e-09 | 0.909890710028688  | 8.66085950720883e-05 | 6 | Arap2       |
| 6.44529846876232e-09 | 0.292400253734882  | 8.90160171520764e-05 | 6 | Calm1       |
| 6.50195456848521e-09 | -0.735220067852095 | 8.97984945453493e-05 | 6 | Sepp1       |
| 7.12607371463634e-09 | 0.522682993260796  | 9.84182040728425e-05 | 6 | Nptn        |
| 7.16322388878299e-09 | 0.748938405934737  | 9.89312851279819e-05 | 6 | H3f3a       |
| 7.17802299722998e-09 | -1.16              | 9.91356756147432e-05 | 6 | Psmb10      |
| 7.24571753632217e-09 | 0.941710936543291  | 0.000100070604894146 | 6 | Zc2hc1a     |
| 7.54023167225418e-09 | 0.911431593996851  | 0.000104138139625503 | 6 | Fgfr2       |
| 7.94190355303061e-09 | 0.539671540982198  | 0.000109685629970906 | 6 | Ubl7        |
| 8.28998781117414e-09 | -0.773324394682057 | 0.000114493021660126 | 6 | Tapbp       |
| 8.35069193899169e-09 | 1.21               | 0.000115331406369414 | 6 | Xk          |
| 8.51230429668125e-09 | 0.622928554933623  | 0.000117563434641465 | 6 | Cox6a1      |
| 8.63230767570365e-09 | 0.634208564053471  | 0.000119220801309143 | 6 | Filip1l     |
| 8.80271218974482e-09 | 1.50               | 0.000121574258052566 | 6 | Srp3k       |
| 8.84892726887796e-09 | -1.13              | 0.000122212534510473 | 6 | Fosl2       |
| 8.93708476226197e-09 | -1.34              | 0.0001234300776516   | 6 | Ptgs2       |
| 8.99839506850056e-09 | -2.05              | 0.000124276834291061 | 6 | 1500015010l |
| 9.43613378042344e-09 | -1.17              | 0.000130322443641428 | 6 | Ifngr1      |
| 9.79970191421648e-09 | -1.06              | 0.000135343683137244 | 6 | Mlit4       |
| 1.22474545620352e-08 | -1.42              | 0.000169149594956268 | 6 | Sox9        |
| 1.26205726638826e-08 | 0.758220890364291  | 0.000174302729060883 | 6 | Itpk1       |
| 1.30376979037715e-08 | 0.757066114469486  | 0.000180063645748988 | 6 | Mertk       |
| 1.37594432065766e-08 | 0.767636678192365  | 0.00019003167012603  | 6 | Nqo1        |
| 1.44871410478364e-08 | -1.26              | 0.000200081905011669 | 6 | Ptgfm       |
| 1.50599135429722e-08 | 0.698249381246711  | 0.00020799246594199  | 6 | Prdm16      |
| 1.5198078250773e-08  | -2.08              | 0.000209900658721426 | 6 | Il6         |
| 1.56379818411568e-08 | 0.746245585996073  | 0.000215976167208217 | 6 | Cfl2        |
| 1.58317016299791e-08 | 1.31               | 0.000218651631211641 | 6 | Btc         |
| 1.59297284585498e-08 | -1.86              | 0.000220005479741032 | 6 | Igsf10      |
| 1.688603963977E-08   | -2.12              | 0.000233213093464863 | 6 | C2          |
| 1.69818598444206e-08 | -1.00              | 0.000234536466311292 | 6 | Tgif1       |
| 1.7187454269936e-08  | 0.747663835700346  | 0.000237375930922086 | 6 | Cox17       |
| 1.74616863748388e-08 | 1.23               | 0.000241163350522899 | 6 | Sor1        |
| 1.89269483137922e-08 | 0.800281465466988  | 0.000261400083161784 | 6 | Mrps14      |
| 1.93148640923599e-08 | 1.15               | 0.000266757587979583 | 6 | Atp1b2      |
| 1.93575735991375e-08 | -0.488619403894116 | 0.000267347448977688 | 6 | Ftl1        |
| 1.94373147286247e-08 | -2.12              | 0.000268448753717035 | 6 | Tmem100     |



|                      |                    |                      |   |             |
|----------------------|--------------------|----------------------|---|-------------|
| 1.97587426897958e-08 | -1.04              | 0.00027288799528877  | 6 | Pdlim2      |
| 2.00100735557414e-08 | -1.97              | 0.000276359125878345 | 6 | Cpne8       |
| 2.11695008898436e-08 | -1.85              | 0.00029237197678963  | 6 | Wnt5a       |
| 2.17145401502516e-08 | -2.06              | 0.000299899514015124 | 6 | Penk        |
| 2.20389983322356e-08 | 0.625931708722657  | 0.000304380605966506 | 6 | Wdr1        |
| 2.21868597229042e-08 | 0.94               | 0.000306422719633029 | 6 | Usp20       |
| 2.2306338354749e-08  | -2.07              | 0.000308072839017439 | 6 | Ccl7        |
| 2.5525115306194e-08  | 0.878568238899646  | 0.000352527367493845 | 6 | Ppp2r5a     |
| 2.55342107300851e-08 | 1.15               | 0.000352652984393205 | 6 | Ryr2        |
| 2.66907439573693e-08 | 0.472221658615732  | 0.000368625864795228 | 6 | Pi15        |
| 2.822036418858E-08   | -1.07              | 0.000389751449808478 | 6 | Pnp         |
| 2.95498651362274e-08 | 0.405564412786942  | 0.000408113187396436 | 6 | Tmem47      |
| 3.12147031351228e-08 | 0.26               | 0.000431106264999181 | 6 | Rpl41       |
| 3.27229730299423e-08 | 0.672252169528309  | 0.000451936980516533 | 6 | Fam126b     |
| 3.39841644151627e-08 | -1.78              | 0.000469355294737813 | 6 | Sdc1        |
| 3.50022189344638e-08 | -2.19              | 0.00048341564570388  | 6 | Srgn        |
| 3.58918827942787e-08 | -1.99              | 0.000495702793271782 | 6 | Arhgdib     |
| 3.6158169824097e-08  | -1.06              | 0.000499380483440604 | 6 | Rbms1       |
| 3.70919037562923e-08 | 1.46               | 0.000512276282778153 | 6 | Timp4       |
| 3.96148498493588e-08 | -1.61              | 0.000547120691269495 | 6 | Gmfb        |
| 3.96372134727718e-08 | 1.37               | 0.000547429555272451 | 6 | Pnck        |
| 4.10789275796031e-08 | -0.827110267115436 | 0.000567341068801899 | 6 | Scara3      |
| 4.41272402869913e-08 | -1.74              | 0.000609441315603637 | 6 | Pdgfrl      |
| 4.62206730530726e-08 | -1.32              | 0.000638353715535986 | 6 | Tmem176a    |
| 4.66952263486538e-08 | 0.71               | 0.000644907771101258 | 6 | Inpp5a      |
| 4.74018145303132e-08 | 1.16               | 0.000654666460478156 | 6 | Akap6       |
| 4.75568554579753e-08 | 0.975420016940364  | 0.000656807730730097 | 6 | Lama5       |
| 4.88335392032303e-08 | 1.23               | 0.000674440009935813 | 6 | Fabp3       |
| 4.96136293923603e-08 | 0.929449081692688  | 0.000685213835537888 | 6 | Itga7       |
| 5.17122730439342e-08 | 0.708776154341075  | 0.000714198203009775 | 6 | 5930403L14F |
| 5.22797342021068e-08 | -1.13              | 0.000722035409065297 | 6 | Gba         |
| 5.22970085216042e-08 | 0.615288194732333  | 0.00072273984691876  | 6 | Ndufa2      |
| 5.23315746484098e-08 | -1.39              | 0.000722751377469188 | 6 | Raph1       |
| 5.59907500699056e-08 | 0.722589454830191  | 0.000773288249215466 | 6 | Adcy5       |
| 5.69929530530057e-08 | -0.90              | 0.000787129674615061 | 6 | Mfap4       |
| 5.71618204530893e-08 | 0.609932519745363  | 0.000789461902277616 | 6 | Bnip2       |
| 5.76335999727948e-08 | 0.784611618323899  | 0.000795977649224269 | 6 | Nkd1        |
| 5.88294924943826e-08 | -1.76              | 0.000812494120839919 | 6 | Matn2       |
| 6.02500088610674e-08 | 0.565689940315131  | 0.000832112872380202 | 6 | Id2         |
| 6.13653378475948e-08 | -0.878548860489697 | 0.000847516681013132 | 6 | Nucb2       |
| 6.74098170012521e-08 | -1.70              | 0.000930996982604293 | 6 | Fbln7       |
| 6.80646342998691e-08 | 0.393744226630397  | 0.000940040664315492 | 6 | Chchd2      |
| 6.8814466309254e-08  | 0.532082382236667  | 0.000950396594197107 | 6 | Ndufa7      |
| 7.10166262989995e-08 | 0.284848001143893  | 0.000980810625815482 | 6 | NP-904330.1 |
| 7.2965542947182e-08  | -1.52              | 0.00100772711364353  | 6 | Sdc3        |
| 7.32900043939843e-08 | -1.90              | 0.00101220825068532  | 6 | Tmem119     |
| 7.53642354727898e-08 | -0.812355143215602 | 0.0010408554561147   | 6 | Shisa5      |
| 7.53770784159982e-08 | 0.690345778514958  | 0.00104103283000335  | 6 | Endod1      |
| 7.57650101996144e-08 | -1.72              | 0.00104639055586687  | 6 | Egfr        |
| 7.61412271728204e-08 | -1.43              | 0.00105158648848382  | 6 | Dapk1       |
| 8.02004245552752e-08 | 0.63               | 0.00110764806353291  | 6 | Slc25a23    |
| 8.04857322567317e-08 | 0.950959406995684  | 0.00111158844819772  | 6 | Lanc13      |
| 8.871905757831E-08   | -2.01              | 0.00122529890421404  | 6 | Ptprb       |
| 8.93102817468653e-08 | -1.17              | 0.00123346430120596  | 6 | Kdm6b       |
| 9.20539327280145e-08 | 0.410693124257816  | 0.00127135686490661  | 6 | Npr1        |
| 9.2461969690532e-08  | 0.839215752358751  | 0.00127699226339594  | 6 | Gnai1       |

|                      |                    |                     |   |             |
|----------------------|--------------------|---------------------|---|-------------|
| 9.43080798113839e-08 | 0.68               | 0.00130248889027502 | 6 | Cnn2        |
| 9.83566814143605e-08 | 0.766138400566928  | 0.00135840412701373 | 6 | Emc8        |
| 9.88049912713431e-08 | 0.616522504157118  | 0.00136459573444852 | 6 | Kctd10      |
| 1.00080372238557e-07 | -1.18              | 0.00138221002098671 | 6 | Abca1       |
| 1.02983851493908e-07 | 0.261546806484581  | 0.00142230997298237 | 6 | Lphn2       |
| 1.03402252058341e-07 | -1.25              | 0.00142808850317774 | 6 | Birc3       |
| 1.0438560292726e-07  | 0.447242173509586  | 0.00144166956202839 | 6 | Cyb5r3      |
| 1.04674875738544e-07 | -1.91              | 0.00144566470882503 | 6 | Thy1        |
| 1.11495806040419e-07 | 0.652406012646644  | 0.00153986857722423 | 6 | Stom        |
| 1.12534266080022e-07 | -1.65              | 0.00155421074883119 | 6 | Mfap2       |
| 1.13531603612747e-07 | 0.987699568087155  | 0.00156798497749565 | 6 | Macrocl1    |
| 1.16740850978951e-07 | 0.381841586296782  | 0.00161230789287029 | 6 | Scube3      |
| 1.32661905560652e-07 | 0.60               | 0.00183219357769817 | 6 | Prkcdp      |
| 1.33194590983419e-07 | 0.936486997284961  | 0.001839550496072   | 6 | Ppp1r12b    |
| 1.35486068959462e-07 | 0.97               | 0.00187119809839913 | 6 | Myo18b      |
| 1.35503205695785e-07 | -2.01              | 0.00187143477386449 | 6 | S1pr3       |
| 1.3982124736796e-07  | 0.378689666588088  | 0.0019310712473989  | 6 | Id1         |
| 1.45055831136194e-07 | 0.70               | 0.00200336608382197 | 6 | Camk2g      |
| 1.4852529799217e-07  | 0.337238769279198  | 0.00205128289056986 | 6 | Pde5a       |
| 1.49096801981106e-07 | -2.00              | 0.00205917593216105 | 6 | Fyn         |
| 1.55871319306496e-07 | 0.396157385905478  | 0.00215273879094201 | 6 | Ltbp1       |
| 1.61308484072015e-07 | -1.79              | 0.0022278314735186  | 6 | Lamb1       |
| 1.70445938547656e-07 | -0.979962606594937 | 0.00235402885728168 | 6 | Pmp22       |
| 1.74292323826581e-07 | 0.333416397212714  | 0.00240715128436891 | 6 | Eif4g2      |
| 1.74616824850385e-07 | -1.90              | 0.00241163296800867 | 6 | Tmem204     |
| 1.77934620550229e-07 | 0.861526440243888  | 0.00245745504441921 | 6 | Myocd       |
| 1.78680077067936e-07 | 0.767380359466878  | 0.00246775054438526 | 6 | Sec24d      |
| 1.79443976070996e-07 | 0.629413353494264  | 0.00247830075351652 | 6 | Txnp        |
| 1.83976307664582e-07 | 0.710482411919976  | 0.00254089678515555 | 6 | S100a4      |
| 1.85253835832537e-07 | 0.480162235294676  | 0.00255854072668317 | 6 | 9530077C05f |
| 1.86265691787479e-07 | 0.527470891038407  | 0.00257251546927688 | 6 | Naca        |
| 1.96833774372123e-07 | 0.96               | 0.00271847125785339 | 6 | Tub         |
| 1.97757728812905e-07 | 0.40               | 0.00273123199263503 | 6 | Micall1     |
| 2.01381123834703e-07 | 0.908306342123985  | 0.00278127470128108 | 6 | Al414108    |
| 2.02275804238898e-07 | -2.12              | 0.00279363113234342 | 6 | Adh1        |
| 2.07999922937015e-07 | 0.540895281701915  | 0.00287268693568311 | 6 | Pip5k1b     |
| 2.33313385935869e-07 | -2.09              | 0.00322229117316029 | 6 | Cxcl2       |
| 2.46102933458871e-07 | -2.20              | 0.00339892761400047 | 6 | Angptl7     |
| 2.49242391433189e-07 | -0.747961279896898 | 0.00344228666808378 | 6 | Slc3a2      |
| 2.52639219853757e-07 | -1.48              | 0.00348920026540024 | 6 | Rhou        |
| 2.55821480262139e-07 | -2.09              | 0.00353315046390041 | 6 | Psmb8       |
| 2.58489493359701e-07 | -1.31              | 0.00356999839279084 | 6 | Mmp14       |
| 2.65210951953387e-07 | -2.23              | 0.00366282845742822 | 6 | Ccl2        |
| 2.65659696028847e-07 | 0.260106145861464  | 0.0036690260618544  | 6 | Lrrc58      |
| 2.66315423357485e-07 | 0.516425097286696  | 0.00367808231199022 | 6 | Kcnc4       |
| 2.69425027127839e-07 | 0.54               | 0.00372102904966259 | 6 | Psmb7       |
| 2.73196072951534e-07 | -0.984925126372343 | 0.00377311096353364 | 6 | Ap2a2       |
| 2.75805243169021e-07 | -1.71              | 0.00380914621340735 | 6 | Plekha6     |
| 2.81525325645128e-07 | 0.766183989362512  | 0.00388814627248487 | 6 | Nrtn        |
| 2.88197994466752e-07 | 0.727428545810429  | 0.00398030250158031 | 6 | Inpp4a      |
| 2.93606497678073e-07 | 0.56               | 0.00405499933943186 | 6 | Ndufv3      |
| 2.98335941321101e-07 | 0.909030741507866  | 0.00412031768558573 | 6 | Ccdc107     |
| 3.07710063913926e-07 | 0.32               | 0.00424978369271524 | 6 | Clu         |
| 3.1125433122832e-07  | 0.561936498082535  | 0.00429873356859432 | 6 | Cox7a2      |
| 3.12097293060286e-07 | 0.684300122912949  | 0.00431037571445561 | 6 | Nat6        |
| 3.16812814606945e-07 | -1.89              | 0.00437550178253652 | 6 | Smim3       |

|                      |                    |                     |   |             |
|----------------------|--------------------|---------------------|---|-------------|
| 3.19840546844738e-07 | -1.39              | 0.00441731779247268 | 6 | Lasp1       |
| 3.271053522169E-07   | -1.86              | 0.00451765201946761 | 6 | Podn        |
| 3.30846620978792e-07 | -1.64              | 0.0045693226823381  | 6 | Nr4a2       |
| 3.43151192994881e-07 | -1.23              | 0.0047392611264523  | 6 | Frzb        |
| 3.53274761544685e-07 | -1.17              | 0.00487907773169364 | 6 | Magt1       |
| 3.56718529981353e-07 | 0.582641348365548  | 0.00492663961757247 | 6 | Cams1       |
| 3.59265337151195e-07 | 0.873826995348511  | 0.00496181357139516 | 6 | Mthfd2l     |
| 3.7779927870256e-07  | -0.424491595520551 | 0.00521778583816105 | 6 | Hspa5       |
| 3.80385724403973e-07 | -1.53              | 0.00525350723974327 | 6 | Igfbp5      |
| 3.98541322068341e-07 | 0.437999368616005  | 0.00550425419908586 | 6 | D8Erd738e   |
| 4.02114554391888e-07 | 0.412384467919443  | 0.00555360411070637 | 6 | Uqcrh       |
| 4.03081902750886e-07 | -1.11              | 0.00556696415889249 | 6 | Med13       |
| 4.1362266161938e-07  | 0.787425449569174  | 0.00571254257962526 | 6 | Ptp4a3      |
| 4.4145631773162e-07  | 0.458877463604706  | 0.00609695320419141 | 6 | Ndufa5      |
| 4.61468040810668e-07 | 0.423877251725469  | 0.00637333511163614 | 6 | Zfhx3       |
| 4.73928606032454e-07 | -1.63              | 0.00654542797791423 | 6 | Tnfaip6     |
| 4.74254712747894e-07 | 0.961428705949563  | 0.00654993183776117 | 6 | Lnpep       |
| 4.81668621524699e-07 | -0.966637479945163 | 0.00665232533187762 | 6 | Ppp3ca      |
| 4.82788844817355e-07 | 0.432783592990585  | 0.0066677967357725  | 6 | Shfm1       |
| 4.88518660880959e-07 | -1.73              | 0.00674693122542692 | 6 | Itih5       |
| 4.92916223978812e-07 | -1.88              | 0.00680766596937138 | 6 | Ahsg        |
| 5.03582853531435e-07 | 0.480190631075065  | 0.00695498279012265 | 6 | BC048507    |
| 5.18708619727688e-07 | 0.389920465135903  | 0.0071638847470591  | 6 | Fn1         |
| 5.22715849907222e-07 | -1.82              | 0.00721922860306865 | 6 | Cmtm3       |
| 5.31777491150162e-07 | 0.412624616048329  | 0.00734437893027488 | 6 | Cav3        |
| 5.33886026423457e-07 | 0.294628292559208  | 0.00737349991093436 | 6 | Rps3a1      |
| 5.42645455153497e-07 | -0.751897348460053 | 0.00749447638112495 | 6 | Tpm4        |
| 5.44300080952515e-07 | -1.26              | 0.00751732841803519 | 6 | Cd248       |
| 5.58842555886375e-07 | 0.310304827596919  | 0.00771817453934673 | 6 | NP-904338.1 |
| 5.63434866740923e-07 | 0.72               | 0.00778159894455889 | 6 | Clybl       |
| 5.65032396202803e-07 | 0.816872292682018  | 0.00780366242395692 | 6 | Slc24a3     |
| 5.69367819509383e-07 | -1.20              | 0.00786353895524409 | 6 | B4galt1     |
| 5.74078521157791e-07 | -0.92              | 0.00792859845571025 | 6 | Nop58       |
| 5.83919185525624e-07 | -1.83              | 0.00806450787129439 | 6 | Pdpm        |
| 5.86814452777426e-07 | 0.590120323025406  | 0.00810449440730903 | 6 | Nav2        |
| 5.94731051772578e-07 | -0.741618906230277 | 0.00821383055603108 | 6 | Cdkn1a      |
| 5.99138537148786e-07 | -1.32              | 0.00827470233656189 | 6 | Oaf         |
| 5.99551858617894e-07 | -0.901195721776648 | 0.00828041071937174 | 6 | Crispld2    |
| 6.10032391193428e-07 | 1.01               | 0.00842515735477243 | 6 | Fstl3       |
| 6.31774268299413e-07 | 0.679602218040764  | 0.00872543441948319 | 6 | Cacna2d1    |
| 6.39544449121405e-07 | 0.536804860495061  | 0.00883274838681572 | 6 | 2900026A02F |
| 6.91517323374397e-07 | 0.527588501200061  | 0.0095505457531238  | 6 | Tecr        |
| 7.30536262313352e-07 | 0.434123242647916  | 0.0100894363188097  | 6 | Ndufa13     |
| 7.39485123902997e-07 | 0.628941814256369  | 0.0102130290462243  | 6 | Sema5a      |
| 7.47245763771856e-07 | 0.435927915421342  | 0.0103202112434531  | 6 | Atp2a2      |
| 7.50908766214679e-07 | -0.730383123881373 | 0.0103708009701909  | 6 | Bmp1        |
| 7.52162256488291e-07 | -1.85              | 0.0103881129243598  | 6 | Gpr133      |
| 7.59467138863763e-07 | 0.494124727978228  | 0.0104890006548474  | 6 | Cnn3        |
| 7.74769451184383e-07 | 0.723177156743518  | 0.0107003408903075  | 6 | Napepld     |
| 7.75890682566005e-07 | -0.709678703796071 | 0.0107158262169191  | 6 | Gas6        |
| 7.8007934694826e-07  | 0.521826718542257  | 0.0107736758607024  | 6 | Olfir1033   |
| 7.82144203621309e-07 | -1.51              | 0.0108021935962139  | 6 | Cxcl16      |
| 8.20138485508066e-07 | -1.12              | 0.0113269326233519  | 6 | Tgfbfr3     |
| 8.91952411002965e-07 | -0.581237824490224 | 0.012318754748362   | 6 | Tuba1a      |
| 9.00814308555439e-07 | -1.83              | 0.0124411464154592  | 6 | Ppl         |
| 9.09783299699097e-07 | -1.86              | 0.0125650171521442  | 6 | Flt3l       |

|                      |                    |                    |   |         |
|----------------------|--------------------|--------------------|---|---------|
| 9.22675263688758e-07 | 0.29               | 0.0127430680668054 | 6 | Ptprz1  |
| 9.36650179524653e-07 | -1.94              | 0.012936075629415  | 6 | Lbp     |
| 9.60330594086869e-07 | -0.494585677952366 | 0.0132631258349337 | 6 | Hsp90b1 |
| 9.84693060084647e-07 | -1.83              | 0.0135995958528291 | 6 | Ecscr   |
| 1.00624534143885e-06 | -1.97              | 0.0138972544106119 | 6 | Cd55    |
| 1.01846380612917e-06 | 1.08               | 0.014066004        | 6 | Tppp3   |
| 1.10634580793754e-06 | 0.41               | 0.0152797419534253 | 6 | Hes1    |
| 1.10785408842938e-06 | 0.80               | 0.0153005728152981 | 6 | Gucy1a3 |
| 1.13952063233665e-06 | -0.706084230958987 | 0.0157379194532014 | 6 | Zbtb20  |
| 1.14832128832599e-06 | -1.54              | 0.0158594653130702 | 6 | Dtx4    |
| 1.17430286140445e-06 | 0.827575350061844  | 0.0162182968188569 | 6 | Gde1    |
| 1.17862541968516e-06 | 0.388817725484905  | 0.0162779956712717 | 6 | Tbc1d9  |
| 1.18285152081256e-06 | 0.861010793816474  | 0.0163363623539423 | 6 | Xpr1    |
| 1.21496837496549e-06 | 0.810111604209056  | 0.0167799282266484 | 6 | Dctn6   |
| 1.25703673696147e-06 | -0.813303460024461 | 0.0173609343741749 | 6 | Xbp1    |
| 1.27195304822897e-06 | 0.80               | 0.0175669435490903 | 6 | Camta1  |
| 1.27917663153725e-06 | -1.68              | 0.017666708458161  | 6 | St3gal4 |
| 1.29127298051997e-06 | 0.561720753353647  | 0.0178337711339613 | 6 | Smim14  |
| 1.30771000572378e-06 | -1.77              | 0.0180607828890511 | 6 | Kcnt2   |
| 1.3372728163066e-06  | 0.441346389472104  | 0.0184690748660105 | 6 | Gm6402  |
| 1.34652974127357e-06 | 0.499588530112515  | 0.0185969222567292 | 6 | Ndufa3  |
| 1.37720337795787e-06 | -0.717731038155637 | 0.0190205558529762 | 6 | Ctsz    |
| 1.43243115853889e-06 | -0.95              | 0.0197833067305806 | 6 | Grina   |
| 1.44169251371228e-06 | -1.15              | 0.0199112153068803 | 6 | Cnot6   |
| 1.44610945711649e-06 | 0.524094766374784  | 0.0199722177122359 | 6 | Sorbs2  |
| 1.45300106174684e-06 | -1.76              | 0.0200673976637856 | 6 | Deptor  |
| 1.46383390552277e-06 | 0.882330633902974  | 0.020217010069175  | 6 | Fibin   |
| 1.51574292159403e-06 | -1.69              | 0.0209339254901352 | 6 | Gbp7    |
| 1.52447675341426e-06 | -0.742907215970054 | 0.0210545484414043 | 6 | Lrp1    |
| 1.54439295231405e-06 | -1.93              | 0.0213296110644093 | 6 | Selp    |
| 1.55438309877093e-06 | 0.716503790484137  | 0.0214675849771253 | 6 | Ndufb10 |
| 1.55575184459454e-06 | -1.57              | 0.0214864887256952 | 6 | Uap1l1  |
| 1.5564108770063e-06  | 0.627824795484917  | 0.021495590622334  | 6 | Mpc2    |
| 1.58430214184484e-06 | -0.782649051935729 | 0.0218807968810191 | 6 | F3      |
| 1.61580594035768e-06 | -1.11              | 0.0223158958422799 | 6 | Tmed5   |
| 1.63178327087331e-06 | 0.494895847642754  | 0.0225365587540313 | 6 | Bmpr1a  |
| 1.63256270124838e-06 | -1.77              | 0.0225473234669414 | 6 | Rasa3   |
| 1.65547845454982e-06 | -0.489545483428749 | 0.0228638129357876 | 6 | Nfib    |
| 1.70461570622395e-06 | 0.754600492285763  | 0.0235424475186589 | 6 | Trabd2b |
| 1.71995810323171e-06 | -1.01              | 0.0237543413637332 | 6 | Sntb2   |
| 1.7420697475978e-06  | -1.69              | 0.0240597252840733 | 6 | Abca9   |
| 1.76896787362483e-06 | -0.739699408254101 | 0.0244312153026325 | 6 | Mxra8   |
| 1.77080721384423e-06 | 0.839896586893634  | 0.0244566184304026 | 6 | Adamts8 |
| 1.81282111273613e-06 | -1.56              | 0.0250368723879987 | 6 | Cdh11   |
| 1.83432501289989e-06 | 0.524446185719675  | 0.0253338627531604 | 6 | Npy1r   |
| 1.84499636805853e-06 | 0.59               | 0.0254812448392563 | 6 | Sdhc    |
| 1.86055352037465e-06 | 0.907792702365681  | 0.0256961046698942 | 6 | Ube2a   |
| 1.89832199280087e-06 | 0.391482247153225  | 0.0262177250425729 | 6 | Uqcr11  |
| 2.00158184572274e-06 | 0.784977048622137  | 0.0276438468712768 | 6 | Sema3a  |
| 2.06160411797594e-06 | 0.760466705926435  | 0.0284728144733657 | 6 | Sept6   |
| 2.10204253540555e-06 | 0.778849637292033  | 0.029031309456486  | 6 | Mtss1   |
| 2.14070099032523e-06 | -1.18              | 0.0295652213773818 | 6 | Lipa    |
| 2.15507910376925e-06 | 0.450268951210016  | 0.029763797502157  | 6 | Tusc1   |
| 2.16483730673036e-06 | -2.07              | 0.0298985680432531 | 6 | Man1a   |
| 2.25236380431377e-06 | -1.91              | 0.0311073965013775 | 6 | Rftn1   |
| 2.26691360912995e-06 | 0.889879090959319  | 0.0313083438556938 | 6 | Fmo3    |



|                      |                    |                    |   |             |
|----------------------|--------------------|--------------------|---|-------------|
| 2.27468648417501e-06 | 0.315500007916655  | 0.0314156950329411 | 6 | Cd9         |
| 2.30810488594053e-06 | 0.660813404681532  | 0.0318772365797247 | 6 | Sec61g      |
| 2.32779332344389e-06 | -1.17              | 0.0321491535900836 | 6 | Tmem9b      |
| 2.3296130797912e-06  | -1.08              | 0.0321742862449963 | 6 | H6pd        |
| 2.33078380191003e-06 | -1.08              | 0.0321904550881794 | 6 | Arhgap29    |
| 2.34053226815167e-06 | 0.950800612772813  | 0.0323250911554427 | 6 | Trpv2       |
| 2.3693059276726e-06  | 1.32               | 0.0327224841670863 | 6 | 0610009L18F |
| 2.37538433675047e-06 | -0.83              | 0.0328064330748608 | 6 | Jmjd1c      |
| 2.44314276028004e-06 | 0.447276379214807  | 0.0337422446622276 | 6 | Nudt4       |
| 2.44786331358827e-06 | -1.10              | 0.0338074402239676 | 6 | Ptbp3       |
| 2.46777564067829e-06 | 0.498726034313292  | 0.0340824493734079 | 6 | Flna        |
| 2.48854214386149e-06 | 0.607098198339016  | 0.0343692555488711 | 6 | Gng12       |
| 2.49431889233891e-06 | 0.733846753848481  | 0.0344490382220927 | 6 | Ndufv2      |
| 2.54810022646006e-06 | -0.47              | 0.0351918122276399 | 6 | Col1a2      |
| 2.58290341229405e-06 | 0.800306517170922  | 0.0356724790271932 | 6 | Sept9       |
| 2.58463754540726e-06 | 1.14               | 0.0356964291396196 | 6 | Smim5       |
| 2.64099740392245e-06 | 0.456309065260565  | 0.036474815145573  | 6 | Rcn2        |
| 2.70276244855166e-06 | 0.45               | 0.0373278521769469 | 6 | Tagln2      |
| 2.72892365488874e-06 | -0.890325469217591 | 0.0376891645976683 | 6 | Rcn1        |
| 2.74406921894939e-06 | -0.674082643568923 | 0.03789834         | 6 | Gm          |
| 2.7638639380668e-06  | -2.12              | 0.0381717248486406 | 6 | G0s2        |
| 2.78814251805788e-06 | -0.831002022325285 | 0.0385070363168973 | 6 | Htra3       |
| 2.79154771122657e-06 | -0.794373154198062 | 0.0385540654397502 | 6 | Plce1       |
| 2.80380887211042e-06 | -1.01              | 0.038723404332717  | 6 | Sept11      |
| 2.81345316487455e-06 | 0.33               | 0.0388566016600824 | 6 | Pkm         |
| 2.8347221495313e-06  | 0.513652971492925  | 0.0391503476071768 | 6 | Rexo2       |
| 2.83639559718259e-06 | 0.511344556645956  | 0.0391734595926888 | 6 | Psmb6       |
| 2.90999317163701e-06 | -1.00              | 0.0401899156934788 | 6 | Sik1        |
| 2.93131105229971e-06 | 0.567429601430371  | 0.0404843369433112 | 6 | Ndufa12     |
| 2.95057006369194e-06 | -0.939274445175848 | 0.0407503231496494 | 6 | Igsf3       |
| 2.98013439609754e-06 | -0.716979860295402 | 0.0411586361445032 | 6 | Mt2         |
| 3.01976950465549e-06 | 0.483102929242689  | 0.041706036628797  | 6 | Dpysl3      |
| 3.25120884886156e-06 | 1.14               | 0.044902445411627  | 6 | Otud1       |
| 3.28829899311215e-06 | -0.750753080384848 | 0.0454146973938719 | 6 | Csmp1       |
| 3.36453507809835e-06 | -1.73              | 0.0464675939636163 | 6 | C1qtnf7     |
| 3.50136087431835e-06 | -0.833198710821703 | 0.0483572950352107 | 6 | Map4k4      |
| 3.51310168948599e-06 | -1.14              | 0.048519447433491  | 6 | Tsc22d3     |
| 3.51914676402431e-06 | 0.890056927866115  | 0.0486029359579398 | 6 | Uchl1       |
| 3.55736697935766e-06 | -1.55              | 0.0491307953519086 | 6 | Bok         |
| 3.6033901769693e-06  | 0.854543368101672  | 0.0497664217341231 | 6 | Snrpd2      |
| 3.82756722600742e-06 | 0.61               | 0.0528625309583884 | 6 | Sema3d      |
| 3.99291906482296e-06 | -0.584789887665566 | 0.0551462052042699 | 6 | Eif1a       |
| 4.03260184321204e-06 | 0.652816574616837  | 0.0556942640566014 | 6 | Cds2        |
| 4.07819817924976e-06 | 1.55               | 0.0563239950536184 | 6 | Rgs5        |
| 4.09330947554976e-06 | 0.641874998441232  | 0.0565326971668177 | 6 | Tesk1       |
| 4.09776311425524e-06 | 0.873258325572994  | 0.0565942063709792 | 6 | Arhgef17    |
| 4.11220910634737e-06 | 1.13               | 0.0567937199677635 | 6 | Igsf9       |
| 4.1611219201611e-06  | -0.690201922256096 | 0.057469254839345  | 6 | Cd47        |
| 4.18319252241345e-06 | -0.834878526287773 | 0.0577740719270522 | 6 | Sri         |
| 4.1865583470994e-06  | 1.00               | 0.0578205573317898 | 6 | Ift43       |
| 4.21471216287125e-06 | -0.883338503869348 | 0.0582093896814149 | 6 | Tnfrsf1a    |
| 4.23713672055587e-06 | -1.56              | 0.0585190952475971 | 6 | Nod1        |
| 4.33624057039361e-06 | 0.631390982774155  | 0.0598878185177062 | 6 | Cox5a       |
| 4.43270476488444e-06 | 0.48               | 0.061220085507819  | 6 | Ncs1        |
| 4.55940190431392e-06 | -0.802140072567821 | 0.0629698997004796 | 6 | Xpnpep1     |
| 4.64551835499302e-06 | 0.634906735221209  | 0.0641592540008086 | 6 | Snape2      |



|                      |                    |                    |   |          |
|----------------------|--------------------|--------------------|---|----------|
| 4.72025314858527e-06 | -0.494745821385365 | 0.0651914162351112 | 6 | Npc2     |
| 4.97566479564946e-06 | -0.702226971762528 | 0.0687189064927147 | 6 | S100a10  |
| 4.98344345734211e-06 | 1.10               | 0.0688263375893519 | 6 | Hspb11   |
| 5.08493506512512e-06 | 0.451815651648226  | 0.0702280381844431 | 6 | Plcb4    |
| 5.17179147357603e-06 | 0.375658758185457  | 0.0714276120415586 | 6 | Cdh13    |
| 5.20381408196383e-06 | -0.939939258414256 | 0.0718698762860025 | 6 | Igsf8    |
| 5.27567600137306e-06 | 0.454072944252744  | 0.0728623612549634 | 6 | Dynlrb1  |
| 5.28569906653712e-06 | -1.58              | 0.0730007898079442 | 6 | Abca8b   |
| 5.44318089492274e-06 | -1.82              | 0.0751757713397779 | 6 | S1pr2    |
| 5.58761404720318e-06 | -0.84              | 0.0771705376059231 | 6 | Epb4.1l2 |
| 5.61825500610847e-06 | 0.493027427218514  | 0.0775937198893641 | 6 | Ndrp2    |
| 5.62739496010349e-06 | 0.521382798817062  | 0.0777199517939893 | 6 | Snmp27   |
| 5.66356690619156e-06 | -1.19              | 0.0782195225414117 | 6 | Jade1    |
| 5.68509255146504e-06 | 0.436392109912283  | 0.0785168132282837 | 6 | Atp2b4   |
| 5.77105254518285e-06 | 0.612041402081615  | 0.0797040067015204 | 6 | Camk1    |
| 5.85655809739774e-06 | -0.841442316395507 | 0.0808849238831602 | 6 | Hexa     |
| 5.89786935579968e-06 | 0.666404229120244  | 0.0814554736729493 | 6 | Ndufb9   |
| 5.99626093157705e-06 | 0.575202075856565  | 0.0828143597260106 | 6 | Mrps21   |
| 6.2530181170817e-06  | -1.40              | 0.0863604332150154 | 6 | Slc4a4   |
| 6.29173343274373e-06 | -0.742892974080098 | 0.0868951304396237 | 6 | Pkd2     |
| 6.43824176923396e-06 | -0.64              | 0.0889185570748903 | 6 | Arl6ip1  |
| 6.48383811753729e-06 | 1.09               | 0.0895482882413075 | 6 | Ppil1    |
| 6.51013099426777e-06 | -1.64              | 0.0899114191618322 | 6 | Gpr39    |
| 6.75235315480049e-06 | -0.763867168192972 | 0.0932567494209495 | 6 | Fcgrt    |
| 6.79176956176238e-06 | 0.653224466675834  | 0.0938011294175003 | 6 | Mfhas1   |
| 6.85616920007105e-06 | 0.522102245607087  | 0.0946905528221813 | 6 | Twsg1    |
| 7.03118269358301e-06 | 0.629897928400602  | 0.0971076641810749 | 6 | Psma2    |
| 7.06224719926845e-06 | -1.54              | 0.0975366960690965 | 6 | Hfe      |
| 7.15205353386446e-06 | 0.845177575542121  | 0.0987770113562021 | 6 | Snta1    |
| 7.23774975186576e-06 | -1.71              | 0.099960561823018  | 6 | Gpc3     |
| 7.36505928582122e-06 | 0.854757350488574  | 0.101718833796477  | 6 | Akt3     |
| 7.56216890197695e-06 | 1.36               | 0.104441114705204  | 6 | Lgr6     |
| 7.56437600994333e-06 | 0.615641202360963  | 0.104471597073327  | 6 | Ilk      |
| 7.60911174824855e-06 | -1.01              | 0.105089442355061  | 6 | Gaa      |
| 7.65508968583624e-06 | -0.68              | 0.105724443651084  | 6 | Scd2     |
| 7.72258453880023e-06 | -1.62              | 0.106656615        | 6 | Runx1    |
| 7.74967337791767e-06 | -0.740507008791488 | 0.107030739022421  | 6 | Skil     |
| 7.77784234398341e-06 | 0.455545915984969  | 0.107419780612755  | 6 | Asph     |
| 7.79482240262356e-06 | -1.38              | 0.107654292202634  | 6 | Psd3     |
| 7.81036806699638e-06 | -1.02              | 0.107868993373287  | 6 | F2r      |
| 7.88397459103175e-06 | -0.825793950039401 | 0.108885573076739  | 6 | Lmo4     |
| 7.93365959045445e-06 | -1.37              | 0.109571772603766  | 6 | Ubtd2    |
| 7.98048651072874e-06 | 0.659238175542185  | 0.110218499199675  | 6 | Prdm6    |
| 8.16394002061291e-06 | 0.509676926816423  | 0.112752175624685  | 6 | Rpl29    |
| 8.24614396967038e-06 | -0.835552223064617 | 0.113887494365118  | 6 | Mpv17    |
| 8.49964389827868e-06 | 0.397557358875683  | 0.117388581879127  | 6 | Atp5e    |
| 8.55972765702884e-06 | -1.38              | 0.118218398671225  | 6 | Smc4     |
| 8.75252549489608e-06 | 0.63               | 0.12088113         | 6 | Agl      |
| 8.86365645446777e-06 | -2.01              | 0.122415959292654  | 6 | Ptx3     |
| 8.97731898322449e-06 | -0.483802168896411 | 0.123985752477313  | 6 | Lman1    |
| 9.40379231572512e-06 | 0.320382133379549  | 0.129875776        | 6 | Calcoco1 |
| 9.50821409942662e-06 | 0.741943559325599  | 0.131317944927181  | 6 | Dbndd2   |
| 9.76915337147792e-06 | 1.05               | 0.134921777213482  | 6 | Jazf1    |
| 1.00161933757686e-05 | 0.561818000351983  | 0.138333647        | 6 | Vamp8    |
| 1.00756531216109e-05 | 1.00               | 0.139154845262569  | 6 | Ethe1    |
| 1.01448636858868e-05 | 0.906195366057563  | 0.140110712365783  | 6 | Prkaa2   |

|                      |                    |                   |   |             |
|----------------------|--------------------|-------------------|---|-------------|
| 1.02090662372647e-05 | -1.48              | 0.140997413802863 | 6 | Itpr2       |
| 1.03122248650332e-05 | 0.489063952312209  | 0.142422137610973 | 6 | Stbd1       |
| 1.05066272042142e-05 | 0.385724713973911  | 0.145107028317403 | 6 | Polr2l      |
| 1.07853690164622e-05 | -1.44              | 0.148956731486359 | 6 | 1700025G04l |
| 1.09487749471981e-05 | 0.393139854738838  | 0.151213530795753 | 6 | Dag1        |
| 1.0995381234265e-05  | -0.849661517225945 | 0.151857210226434 | 6 | Chpf        |
| 1.10823860826628e-05 | 1.45               | 0.153058834187656 | 6 | Tbxa2r      |
| 1.11516866347477e-05 | 0.469222566051925  | 0.154015944112501 | 6 | Aldoat1     |
| 1.11634544333287e-05 | -0.797029879262338 | 0.154178469178702 | 6 | Rap1b       |
| 1.12850462748607e-05 | -0.784521622485291 | 0.155857774       | 6 | Olflml2b    |
| 1.1926651796136e-05  | 0.666051091624464  | 0.164718987956434 | 6 | Ndufb7      |
| 1.1928200187148e-05  | 0.696114908718078  | 0.164740372784701 | 6 | Ywhah       |
| 1.24104738038253e-05 | 0.968833245662138  | 0.171401053704632 | 6 | Dnajb5      |
| 1.24166767211193e-05 | 0.359021113713495  | 0.171486722195379 | 6 | Zcrb1       |
| 1.25141522589158e-05 | -0.717573074689066 | 0.172832956847886 | 6 | Klf4        |
| 1.26227498849052e-05 | 0.767797788742378  | 0.174332798660425 | 6 | Sesn1       |
| 1.26372114428945e-05 | -1.60              | 0.174532527237816 | 6 | Zfp521      |
| 1.28035787477925e-05 | -0.868355253873974 | 0.176830226085762 | 6 | Cdkn1c      |
| 1.32887067790509e-05 | -0.669890992822525 | 0.183530329325472 | 6 | Mtch1       |
| 1.33162636310485e-05 | -0.534047460439623 | 0.183910917008411 | 6 | Pdia6       |
| 1.33278452196537e-05 | -1.74              | 0.184070870328638 | 6 | Tcf21       |
| 1.33972071643521e-05 | 0.417842830582443  | 0.185028828146866 | 6 | Atp5k       |
| 1.34133899904753e-05 | -0.854708034346449 | 0.185252329158454 | 6 | Arih1       |
| 1.34786967148811e-05 | 0.351319590564751  | 0.186154280329223 | 6 | Serf2       |
| 1.3490188462947e-05  | 0.561494680478719  | 0.186312992861761 | 6 | Tead3       |
| 1.39554046505115e-05 | 0.825263124394334  | 0.192738093628215 | 6 | Cdo1        |
| 1.43739277365216e-05 | -1.34              | 0.198518316       | 6 | Ltbp2       |
| 1.46713924968036e-05 | 0.471958166448724  | 0.202626601773354 | 6 | Hist1h2bc   |
| 1.47813280728614e-05 | -1.51              | 0.204144922014289 | 6 | Plxna2      |
| 1.52514035775172e-05 | -1.37              | 0.210637135       | 6 | Prrg3       |
| 1.54763123324967e-05 | -0.616028542443494 | 0.213743349624111 | 6 | Gbp2        |
| 1.54818396732812e-05 | 0.431621053983276  | 0.213819687727687 | 6 | Gstp1       |
| 1.60433277190746e-05 | 0.871485148420061  | 0.221574399128139 | 6 | Siva1       |
| 1.60844277209283e-05 | 0.396522865899517  | 0.222142031253741 | 6 | Rps13       |
| 1.65770869779066e-05 | -0.731516568461472 | 0.228946148251869 | 6 | Kdelr2      |
| 1.6835545478258e-05  | -0.676150444898055 | 0.232515718600221 | 6 | Zfp36       |
| 1.78397172649412e-05 | -1.44              | 0.246384335146102 | 6 | Fmn12       |
| 1.81136740194067e-05 | 0.604002528270839  | 0.250167951882026 | 6 | Mrpl33      |
| 1.83052459652651e-05 | -1.19              | 0.252813752026276 | 6 | Casp4       |
| 1.83172978395993e-05 | 0.610588937964238  | 0.252980200462705 | 6 | 1810026J23F |
| 1.84343989894376e-05 | 0.712623792793145  | 0.254597484443123 | 6 | Lrch1       |
| 1.86535160439758e-05 | -1.74              | 0.25762371        | 6 | Bcl3        |
| 1.8698267791373e-05  | -0.354523481306995 | 0.258241776466653 | 6 | B2m         |
| 1.89357503641598e-05 | -1.27              | 0.261521648279411 | 6 | Eng         |
| 1.9672419088249e-05  | 0.541948295745529  | 0.271695780027807 | 6 | 4930523C07f |
| 1.99675722695104e-05 | -0.922293060335976 | 0.275772140614208 | 6 | Myh9        |
| 2.03867176049008e-05 | 0.255609695552186  | 0.281560956841285 | 6 | Des         |
| 2.10596657314106e-05 | 0.765128276418354  | 0.290855043416512 | 6 | Abrac1      |
| 2.13068259854052e-05 | -1.48              | 0.294268573684431 | 6 | Hiat1       |
| 2.1931674583541e-05  | 0.418248949520262  | 0.302898357673285 | 6 | Gstm2       |
| 2.20276573908222e-05 | 0.652188304527384  | 0.304223976224645 | 6 | Gstm7       |
| 2.20948653224442e-05 | 0.639925449943674  | 0.305152184968277 | 6 | Sparcl1     |
| 2.21810864898578e-05 | 0.514134416047484  | 0.306342985511426 | 6 | Dusp10      |
| 2.22539194301616e-05 | -1.86              | 0.307348881249962 | 6 | Hhip        |
| 2.23938691946712e-05 | 0.826682459720923  | 0.309281727447604 | 6 | 5430417L22F |
| 2.26110018297253e-05 | 0.535706901301612  | 0.312280546270336 | 6 | Eno1b       |

|                      |                    |                   |   |            |
|----------------------|--------------------|-------------------|---|------------|
| 2.31105858331913e-05 | -0.587351067909562 | 0.319180300942204 | 6 | Cln4-2     |
| 2.42815085778296e-05 | 0.654665443755782  | 0.335351914968404 | 6 | Ncald      |
| 2.52308662997468e-05 | 0.371330319202607  | 0.348463494465803 | 6 | Ost4       |
| 2.52764044819447e-05 | 0.333384787566851  | 0.349092422300138 | 6 | Pfdn5      |
| 2.54761754954101e-05 | -1.02              | 0.351851459767109 | 6 | Nras       |
| 2.55168094430932e-05 | 0.791302396662854  | 0.352412655       | 6 | Dhx32      |
| 2.58581593831984e-05 | -0.677716254776219 | 0.357127039241353 | 6 | Loxl1      |
| 2.63184460934113e-05 | -1.11              | 0.363484058996104 | 6 | Arhgap21   |
| 2.64799323056115e-05 | 0.826188767940425  | 0.365714345072801 | 6 | Lypla1     |
| 2.69288399888222e-05 | 1.39               | 0.371914209085623 | 6 | Cited2     |
| 2.69879535635627e-05 | 0.354861447258672  | 0.372730626666364 | 6 | Cox5b      |
| 2.73351143201759e-05 | -1.03              | 0.377525263875949 | 6 | Vegfa      |
| 2.78236237912138e-05 | -0.77              | 0.384272068180453 | 6 | Baz2b      |
| 2.78554025034223e-05 | -1.89              | 0.384710963974765 | 6 | Sp100      |
| 2.79287525311196e-05 | -1.65              | 0.385724001207293 | 6 | LOC1026365 |
| 2.82620296988401e-05 | -0.719547869112082 | 0.390326892170681 | 6 | Top1       |
| 2.83011261883902e-05 | -1.00              | 0.390866853787857 | 6 | Lsp1       |
| 2.87075087212507e-05 | -1.13              | 0.396479402949193 | 6 | Ctdnep1    |
| 2.89009258960899e-05 | 0.498155988906928  | 0.399150687550898 | 6 | Rbm24      |
| 2.93543285745002e-05 | 0.830045221564941  | 0.405412631942422 | 6 | Hint3      |
| 2.97974102033895e-05 | 0.48               | 0.411532032319013 | 6 | BC031181   |
| 3.03563554648391e-05 | -0.964204087570053 | 0.419251625324893 | 6 | Man2a1     |
| 3.04089704249299e-05 | 0.348210937872414  | 0.419978290538706 | 6 | Rgs7       |
| 3.04134841644988e-05 | 0.486167285649192  | 0.420040629795893 | 6 | Cwc15      |
| 3.06995430748733e-05 | -0.765327355538887 | 0.423991389407075 | 6 | Daam1      |
| 3.07462398192567e-05 | 0.262874133702505  | 0.424636318143754 | 6 | Prdx1      |
| 3.08657585521422e-05 | 0.677241718371286  | 0.426286991363636 | 6 | Arl4d      |
| 3.11145331820378e-05 | 0.88               | 0.429722817777124 | 6 | B3galnt2   |
| 3.14715535698898e-05 | -1.90              | 0.434653626353748 | 6 | Ccl11      |
| 3.16260213522879e-05 | -1.50              | 0.436786980896448 | 6 | Col4a4     |
| 3.16284011060658e-05 | 0.412202308044384  | 0.436819847675874 | 6 | Shroom3    |
| 3.16896215954263e-05 | 0.479170950634338  | 0.437665363854433 | 6 | Nedd8      |
| 3.19657895925084e-05 | 0.319274979591435  | 0.441479520062133 | 6 | Rock2      |
| 3.23508622552554e-05 | 0.319967826329058  | 0.446797758607332 | 6 | Gng5       |
| 3.23814952435327e-05 | -1.64              | 0.447220830808431 | 6 | Meox2      |
| 3.24954799872807e-05 | -1.23              | 0.448795074104333 | 6 | Col16a1    |
| 3.26700012799666e-05 | -0.747435394474828 | 0.451205387677619 | 6 | Herpud1    |
| 3.31973006392846e-05 | -0.869268666617551 | 0.458487919129159 | 6 | Nfkb1      |
| 3.35422424275761e-05 | 0.397600847778492  | 0.463251910167254 | 6 | Edf1       |
| 3.35522626172178e-05 | 0.445874328219201  | 0.463390299006395 | 6 | Kif1c      |
| 3.54181013969668e-05 | -0.74              | 0.489159398393508 | 6 | Nfkbiz     |
| 3.54669651480815e-05 | 1.29               | 0.489834255660154 | 6 | Csdc2      |
| 3.65952109927695e-05 | -0.637642881120062 | 0.505416459021139 | 6 | Tpm3       |
| 3.68388711959554e-05 | -1.48              | 0.50878165        | 6 | Rab3il1    |
| 3.68885587437662e-05 | -1.59              | 0.509467884810155 | 6 | Tnfaip2    |
| 3.70461304231373e-05 | 0.893730941120634  | 0.511644107273949 | 6 | Pkig       |
| 3.70722435176135e-05 | -1.51              | 0.512004755       | 6 | Slc10a6    |
| 3.74848744362807e-05 | 0.402647344157971  | 0.517703600839473 | 6 | Npm1       |
| 3.76198748142828e-05 | 0.330274659162628  | 0.519568091       | 6 | Myl12a     |
| 3.79769880726578e-05 | -1.27              | 0.524500182271477 | 6 | Dclk1      |
| 3.80293385481176e-05 | 0.281282050606314  | 0.525223194688052 | 6 | Pin1rt1    |
| 3.80596371270776e-05 | 0.48               | 0.525641648362068 | 6 | Park7      |
| 3.81704031065465e-05 | 0.381933345317268  | 0.527171437304513 | 6 | Atp5c1     |
| 3.84711552805979e-05 | 1.07               | 0.531325125580337 | 6 | Anapc7     |
| 3.85291808093819e-05 | -1.86              | 0.532126516158373 | 6 | Gsta3      |
| 3.8903287152235e-05  | 0.524607663863638  | 0.537293298859518 | 6 | B230219D22 |

|                      |                    |                   |   |             |
|----------------------|--------------------|-------------------|---|-------------|
| 3.89613225611784e-05 | 0.390820503511762  | 0.538094825892435 | 6 | Nes         |
| 3.93578529895684e-05 | 0.770081147472087  | 0.543571308       | 6 | Rpl35       |
| 3.96416422991151e-05 | 0.344131146407618  | 0.547490721793078 | 6 | Pdlim5      |
| 4.02170556146427e-05 | 0.728642402599894  | 0.555437755093831 | 6 | Psmb5       |
| 4.0218539034558e-05  | -0.567034392472088 | 0.555458243       | 6 | Junb        |
| 4.03498617441894e-05 | 0.51               | 0.557271940548999 | 6 | Pygm        |
| 4.08625764577268e-05 | -0.749497368586004 | 0.564353043457665 | 6 | Aspn        |
| 4.08936282212967e-05 | 0.423674992261845  | 0.564781899364328 | 6 | Hoxb2       |
| 4.14327289473403e-05 | 0.355054376934138  | 0.572227419491717 | 6 | Rps16       |
| 4.15575424594207e-05 | 0.980462171984328  | 0.573951218907059 | 6 | 2210407C18f |
| 4.37352415673928e-05 | 0.292006777327776  | 0.604027421287262 | 6 | Gm1821      |
| 4.60238254866131e-05 | 0.596106706975008  | 0.635635053795613 | 6 | Rnf7        |
| 4.60397668735451e-05 | 0.553215766089955  | 0.635855220290531 | 6 | Rdh14       |
| 4.68437378315156e-05 | -1.38              | 0.646958863191062 | 6 | Ifit3       |
| 4.81490506235708e-05 | 0.455667865275577  | 0.664986538162137 | 6 | Dhrs3       |
| 4.85103307348887e-05 | -0.807397285139525 | 0.669976177779547 | 6 | Sepn1       |
| 4.86143409601631e-05 | -1.05              | 0.671412663000813 | 6 | Anpep       |
| 5.00959164212338e-05 | 0.666101592996266  | 0.691874701693659 | 6 | Zfp771      |
| 5.020582928178E-05   | -1.21              | 0.693392708210664 | 6 | Flrt2       |
| 5.06814018604547e-05 | 0.384575079066634  | 0.699960841       | 6 | Rps7        |
| 5.07571106254529e-05 | 0.899495606028347  | 0.701006455       | 6 | Pfkm        |
| 5.15177905176023e-05 | -0.756942035161867 | 0.711512204838606 | 6 | Tubb2a      |
| 5.19456119750166e-05 | -1.76              | 0.717420846986954 | 6 | Aldh3a1     |
| 5.21583962097824e-05 | 0.919587137110021  | 0.720359610053304 | 6 | Slc4a3      |
| 5.22156308504789e-05 | -0.495020490189066 | 0.721150077675964 | 6 | Calr        |
| 5.22579993476174e-05 | -0.969031090978325 | 0.721735228989943 | 6 | Pde3b       |
| 5.37387821455323e-05 | -1.68              | 0.742186320211947 | 6 | Ildr2       |
| 5.37646055243472e-05 | -1.43              | 0.742542966896759 | 6 | Ntrk2       |
| 5.40902500983012e-05 | -1.60              | 0.747040444107638 | 6 | Glt8d2      |
| 5.47649841092052e-05 | 0.58               | 0.756359195532232 | 6 | Atpif1      |
| 5.5074057109544e-05  | -1.80              | 0.760627802739912 | 6 | Ebf2        |
| 5.52614163037205e-05 | -0.775172811699009 | 0.763215420570684 | 6 | Tiparp      |
| 5.58807733125674e-05 | -1.62              | 0.771769360219868 | 6 | Col8a1      |
| 5.6223633336225e-05  | 0.468320597278407  | 0.776504600006604 | 6 | Iscu        |
| 5.63848091031157e-05 | -1.57              | 0.778730598523131 | 6 | Lhfp12      |
| 5.64948079986956e-05 | 0.982866499780123  | 0.780249793269984 | 6 | Dtd2        |
| 5.70747361874887e-05 | 0.318797628622551  | 0.788259181485406 | 6 | Rbp1        |
| 5.75863754090983e-05 | 0.440477208801652  | 0.795325430775057 | 6 | Samp        |
| 5.78310274505651e-05 | 0.856019725541362  | 0.798704320119754 | 6 | Taf1a       |
| 5.80475515067174e-05 | 0.472633014119662  | 0.801694733859274 | 6 | Chpt1       |
| 5.816332587493E-05   | 0.355339954750979  | 0.803293693658658 | 6 | Tceb2       |
| 5.8721662552655e-05  | 0.372272569266122  | 0.811004881514718 | 6 | Csde1       |
| 5.96826304857955e-05 | 0.598826690753148  | 0.824276809639321 | 6 | Hspa2       |
| 6.03199218883825e-05 | -1.46              | 0.833078441200451 | 6 | Fgf7        |
| 6.05999321263534e-05 | 0.528757264820586  | 0.836945662597067 | 6 | Grb14       |
| 6.10621391492564e-05 | 0.582245762364134  | 0.843329204       | 6 | Gmppa       |
| 6.12473226723725e-05 | 0.584654705950002  | 0.845886773428137 | 6 | Ndufb6      |
| 6.12915142073957e-05 | -1.14              | 0.846497102718341 | 6 | Unc5b       |
| 6.1402580077884e-05  | 0.718908671670286  | 0.848031033455656 | 6 | Zfp790      |
| 6.1868227524175e-05  | 0.260642814273857  | 0.854462090336381 | 6 | Tomm6       |
| 6.20907677880424e-05 | -1.56              | 0.857535593920654 | 6 | Mmp19       |
| 6.26675944825556e-05 | -0.630672135729885 | 0.865502147398575 | 6 | Cd302       |
| 6.31255077807319e-05 | -1.28              | 0.871826387959689 | 6 | Stat2       |
| 6.49076655961094e-05 | -1.42              | 0.896439769547867 | 6 | Prrx2       |
| 6.59130018306531e-05 | -1.72              | 0.910324468       | 6 | Sult5a1     |
| 6.72999702726489e-05 | 0.557116687752131  | 0.929479889435554 | 6 | Ppm1b       |



|                      |                    |                   |   |         |
|----------------------|--------------------|-------------------|---|---------|
| 6.87438212380786e-05 | -0.568783264134197 | 0.949420915119104 | 6 | Ier3    |
| 7.07831976722466e-05 | -0.674429543565185 | 0.977586743051397 | 6 | Slc39a7 |
| 7.1674860372117e-05  | -0.837368550410046 | 0.989901496599308 | 6 | Igf2r   |
| 7.25213220308395e-05 | 0.849464166850119  | 1                 | 6 | Dysf    |
| 7.38157534696022e-05 | -1.22              | 1                 | 6 | Ndn     |
| 7.45051236178101e-05 | 1.13               | 1                 | 6 | Tmod1   |
| 7.51478366522184e-05 | 0.347009632526075  | 1                 | 6 | Cltc    |
| 7.58846260535627e-05 | 0.281941985956602  | 1                 | 6 | Rps3    |
| 7.62061017252956e-05 | 0.476643951835703  | 1                 | 6 | Col4a2  |
| 7.72056144046589e-05 | 1.18               | 1                 | 6 | Plxnb1  |
| 7.96538410610608e-05 | -1.02              | 1                 | 6 | Nfatc1  |
| 7.97414068247136e-05 | 0.263086790988543  | 1                 | 6 | Skp1a   |
| 7.97779448628944e-05 | -0.884610033188831 | 1                 | 6 | Wsb1    |
| 8.1506268239159e-05  | -1.76              | 1                 | 6 | S100b   |
| 8.2060558040499e-05  | -1.87              | 1                 | 6 | Ephx2   |
| 8.24325920312866e-05 | 0.384800210828468  | 1                 | 6 | Filip1  |
| 8.40281723895479e-05 | -0.507224269831027 | 1                 | 6 | Fosb    |
| 8.53556333502604e-05 | -0.765029897566607 | 1                 | 6 | Zeb2    |
| 8.57429266032733e-05 | -0.499466452601095 | 1                 | 6 | Nbl1    |
| 8.84464054056304e-05 | -1.98              | 1                 | 6 | Clec14a |
| 8.86538235319422e-05 | 0.429429661675304  | 1                 | 6 | Fat4    |
| 8.96492263990816e-05 | -0.834957430704854 | 1                 | 6 | Prr13   |
| 9.03651078040655e-05 | 0.574417973740558  | 1                 | 6 | Slc8a1  |
| 9.38295119778306e-05 | -1.11              | 1                 | 6 | Trib1   |
| 9.42858096606352e-05 | -1.14              | 1                 | 6 | Cbfb    |
| 9.69169809116929e-05 | 0.464575282033534  | 1                 | 6 | Fyco1   |
| 9.71515484588951e-05 | 0.40               | 1                 | 6 | Hint1   |
| 9.71598578454631e-05 | 0.543063394625937  | 1                 | 6 | Cobll1  |
| 9.81183555634604e-05 | -0.842423805659453 | 1                 | 6 | Dpysl2  |
| 9.93864677466849e-05 | -1.16              | 1                 | 6 | Lrrk1   |
| 9.94059907649102e-05 | 0.660023662708275  | 1                 | 6 | Prkg1   |
| 9.95352419808209e-05 | -0.737768415225611 | 1                 | 6 | Dazap1  |
| 0.000100072261376133 | -1.39              | 1                 | 6 | Sfrp4   |
| 0.00010031846433979  | -0.573594793427798 | 1                 | 6 | Arf6    |
| 0.000100326151938861 | -1.42              | 1                 | 6 | Abcg2   |
| 0.000100675554968261 | 0.605348006434303  | 1                 | 6 | Syne1   |
| 0.000101701779894727 | -0.820004955945421 | 1                 | 6 | Rbbp6   |
| 0.000103720375691208 | -0.68              | 1                 | 6 | Hivep2  |
| 0.000105940091497852 | -1.12              | 1                 | 6 | Mettl9  |
| 0.000106275963027808 | -1.65              | 1                 | 6 | Cdk14   |
| 0.000106464235079381 | 0.838039973269739  | 1                 | 6 | Rftn2   |
| 0.00010737916105998  | 1.14               | 1                 | 6 | Gldn    |
| 0.000109307622691135 | 0.354452900173431  | 1                 | 6 | Atp5h   |
| 0.000109755811833194 | 0.448601695437015  | 1                 | 6 | Fam118a |
| 0.000113411148460684 | 0.507308928689821  | 1                 | 6 | Minos1  |
| 0.000114510400473035 | -1.26              | 1                 | 6 | Prkcg   |
| 0.000116759227337688 | -0.770054078723579 | 1                 | 6 | Mrc2    |
| 0.0001180256949814   | -1.78              | 1                 | 6 | Bmper   |
| 0.000118408185148924 | 0.589387957469386  | 1                 | 6 | Glo1    |
| 0.00011930892093666  | -1.55              | 1                 | 6 | Tshz2   |
| 0.000121215456222947 | 0.420201765260873  | 1                 | 6 | Ndufs6  |
| 0.000126681559164876 | 0.253459545007014  | 1                 | 6 | Pebp1   |
| 0.000126821611462641 | 0.659709573710305  | 1                 | 6 | Ccdc68  |
| 0.000127341796201988 | -0.786053401309027 | 1                 | 6 | Med13l  |
| 0.000127718541978472 | 0.452667148915612  | 1                 | 6 | Itga1   |
| 0.000128650277363083 | -0.42              | 1                 | 6 | Egr1    |



|                      |                    |   |   |             |
|----------------------|--------------------|---|---|-------------|
| 0.000129062040171803 | -1.50              | 1 | 6 | Fst         |
| 0.000130419596418214 | 0.407149271350274  | 1 | 6 | Myeov2      |
| 0.000132862539461113 | -0.594177739842992 | 1 | 6 | Il6st       |
| 0.00013407499350222  | -0.931303163048235 | 1 | 6 | Agpat2      |
| 0.000135842146689671 | -1.49              | 1 | 6 | Plscr4      |
| 0.000141140102312563 | -1.35              | 1 | 6 | Sema6d      |
| 0.000143271205390266 | -0.336614152174284 | 1 | 6 | Jun         |
| 0.000143380332210853 | 0.573760295321587  | 1 | 6 | Tmtc3       |
| 0.000144271305440538 | -0.70              | 1 | 6 | Jak1        |
| 0.000144283113336276 | 0.578731508954316  | 1 | 6 | Kcnd3       |
| 0.000145125355411435 | -0.898526610236271 | 1 | 6 | Trim8       |
| 0.000145355250908854 | -0.42              | 1 | 6 | Islr        |
| 0.000146467532763097 | -1.84              | 1 | 6 | Bmx         |
| 0.000146935932534483 | -1.05              | 1 | 6 | Capg        |
| 0.000148866368382849 | -0.734531242066388 | 1 | 6 | Ndrp1       |
| 0.000151365304836517 | -1.71              | 1 | 6 | Stxbp6      |
| 0.000151908377669911 | 0.694753606608219  | 1 | 6 | Uba52       |
| 0.000153530192274998 | -0.775169932431034 | 1 | 6 | Pid1        |
| 0.000155386046866731 | -1.55              | 1 | 6 | Sirpa       |
| 0.000155431064125413 | -1.00              | 1 | 6 | Fam63b      |
| 0.000156908817389962 | 0.469191035552192  | 1 | 6 | 2810428I15R |
| 0.000157998738998405 | -0.527848504766882 | 1 | 6 | Mfap5       |
| 0.000158571902943118 | -1.18              | 1 | 6 | Stim2       |
| 0.000159813232907527 | 0.878122520246497  | 1 | 6 | Zfp809      |
| 0.000160278782275279 | -1.82              | 1 | 6 | 3632451O06I |
| 0.000160966020563969 | 0.353234013128358  | 1 | 6 | Tinagl1     |
| 0.000164173313262107 | -0.934803825534629 | 1 | 6 | Akap2       |
| 0.000166481619085106 | 0.628879776393929  | 1 | 6 | Fzd7        |
| 0.00016660721820067  | 0.518148937174196  | 1 | 6 | Nek9        |
| 0.000168409936997308 | -1.59              | 1 | 6 | Tbc1d9b     |
| 0.00017418209570185  | 0.351477901926491  | 1 | 6 | Map1a       |
| 0.000175532939163611 | -0.605774301919974 | 1 | 6 | Vit         |
| 0.000175652113237653 | -1.26              | 1 | 6 | Heg1        |
| 0.000176236577244394 | -0.667549302015415 | 1 | 6 | Sorbs3      |
| 0.000179790362242569 | -0.568799719234612 | 1 | 6 | Lamp2       |
| 0.000182785027554695 | -0.904196361220101 | 1 | 6 | Tm7sf3      |
| 0.000186394392853253 | 0.430080915361625  | 1 | 6 | Atp6v1a     |
| 0.00018805077129372  | -1.08              | 1 | 6 | Ncoa7       |
| 0.000189033155367242 | 0.569093782701712  | 1 | 6 | Cd97        |
| 0.000189034410078858 | 0.459859953861425  | 1 | 6 | Ptprs       |
| 0.000190392435493824 | -0.824693260249945 | 1 | 6 | C1qtnf1     |
| 0.000193827256168582 | -0.904832051549731 | 1 | 6 | Slc41a1     |
| 0.000196468628863157 | -0.702695158835011 | 1 | 6 | Mxra7       |
| 0.000200402680840506 | -0.854411912966328 | 1 | 6 | Pqlc1       |
| 0.000204386314508188 | 0.853061731210661  | 1 | 6 | Nacc2       |
| 0.000204549851601672 | -1.53              | 1 | 6 | Farp1       |
| 0.000205557092977338 | -0.671103340790206 | 1 | 6 | Tram1       |
| 0.000206064419081291 | 0.250909536238226  | 1 | 6 | Prkar1a     |
| 0.000206244709661371 | -0.654009461261252 | 1 | 6 | Mycbp2      |
| 0.000208393282553555 | -1.28              | 1 | 6 | Sphk1       |
| 0.000209693058982174 | 0.398494391426263  | 1 | 6 | Atp8b1      |
| 0.000209940700428386 | -1.23              | 1 | 6 | Baiap2      |
| 0.000211409361088785 | 0.352260129751108  | 1 | 6 | Naa20       |
| 0.000214362601570542 | 0.518472817646082  | 1 | 6 | Cux1        |
| 0.000215096819974018 | 0.433430809140627  | 1 | 6 | Tacc2       |
| 0.00021708017039399  | -1.11              | 1 | 6 | Dpy19l1     |

|                      |                    |   |   |          |
|----------------------|--------------------|---|---|----------|
| 0.000217225631302342 | -0.856504562033026 | 1 | 6 | Abhd5    |
| 0.000219638733316666 | 0.400814867986485  | 1 | 6 | Dact3    |
| 0.000222519277215451 | 0.680904558002813  | 1 | 6 | Mtus1    |
| 0.000223420211772631 | 0.731681131193736  | 1 | 6 | Wscd2    |
| 0.000224198378364347 | 0.389709270435861  | 1 | 6 | Tgm2     |
| 0.000226121623084668 | 0.611300091806564  | 1 | 6 | Pttg1    |
| 0.00022657354061841  | 0.799403173119028  | 1 | 6 | Hspe1    |
| 0.000227309639719386 | -0.728268303521411 | 1 | 6 | Tubb6    |
| 0.000230333926807581 | 0.663528433484692  | 1 | 6 | Pfdn1    |
| 0.000230723411517353 | 0.631706536601319  | 1 | 6 | Acadm    |
| 0.000232723899614054 | -2.06              | 1 | 6 | Tek      |
| 0.000233962092633561 | -0.759655513969881 | 1 | 6 | Crel2    |
| 0.000235861283770577 | -0.941870025458263 | 1 | 6 | Zcchc6   |
| 0.000236602428294538 | -0.572011243010432 | 1 | 6 | Col6a1   |
| 0.000241529178077221 | 0.772952571525883  | 1 | 6 | Tfrc     |
| 0.000242551650562787 | 0.454223653270453  | 1 | 6 | Oat      |
| 0.000243530177480702 | 0.698557655369974  | 1 | 6 | Zmym6    |
| 0.000247735735667078 | -1.29              | 1 | 6 | Ccbe1    |
| 0.000252954643184629 | 1.17               | 1 | 6 | Trak2    |
| 0.000254523057373596 | -1.39              | 1 | 6 | Ets1     |
| 0.00025791222488097  | 0.801934436672974  | 1 | 6 | Cacna1c  |
| 0.000258523826417043 | 0.587934842320152  | 1 | 6 | Rpl15    |
| 0.000260212005123295 | 0.628127311825714  | 1 | 6 | Synm     |
| 0.000266233271833918 | 0.713325939121195  | 1 | 6 | Zfp367   |
| 0.000268239577188777 | -0.761359472817504 | 1 | 6 | Nin      |
| 0.000271713804731995 | -0.37              | 1 | 6 | Os9      |
| 0.000273995571108665 | 1.03               | 1 | 6 | Bche     |
| 0.000274602663612463 | -1.25              | 1 | 6 | Twist1   |
| 0.000274756355787142 | 0.536808129740987  | 1 | 6 | Vdac2    |
| 0.000276587185029169 | 0.877691644920552  | 1 | 6 | Surf2    |
| 0.000280474758777907 | 0.700681593545001  | 1 | 6 | Gamt     |
| 0.000282810795685244 | -0.46              | 1 | 6 | Rrbp1    |
| 0.000293095738794008 | 0.473764291796298  | 1 | 6 | Sun2     |
| 0.000293236272009877 | 0.85               | 1 | 6 | Manbal   |
| 0.000298007603194735 | -1.61              | 1 | 6 | Al607873 |
| 0.000298627796146836 | 0.331188093370797  | 1 | 6 | Hsbp1    |
| 0.000299291140661207 | -0.413487635707523 | 1 | 6 | Smarca2  |
| 0.000300676019477117 | 0.826114960639156  | 1 | 6 | Jam3     |
| 0.000300785955851385 | 0.449479030953399  | 1 | 6 | Tax1bp1  |
| 0.000303529502487136 | 0.790727913069936  | 1 | 6 | Fahd2a   |
| 0.000309599885623829 | 0.838224040157334  | 1 | 6 | Bri3     |
| 0.000309784216729635 | 0.29               | 1 | 6 | Rpl39    |
| 0.000313373810116116 | -1.10              | 1 | 6 | Tnxb     |
| 0.000313507827743661 | 0.346371518796759  | 1 | 6 | Slc25a3  |
| 0.000313994567123355 | 0.607014893789574  | 1 | 6 | Fam162a  |
| 0.000314297078025042 | 0.408127539362689  | 1 | 6 | Psmb1    |
| 0.000315910386652251 | 0.559692300284007  | 1 | 6 | Abtb2    |
| 0.000316130524560968 | 0.474901111921116  | 1 | 6 | Anxa6    |
| 0.000320919674161436 | 0.501765327377107  | 1 | 6 | Ndufb2   |
| 0.000321636149890572 | -0.962489668681438 | 1 | 6 | Irf9     |
| 0.000321886007547054 | -1.63              | 1 | 6 | Xaf1     |
| 0.000321929931875878 | -1.96              | 1 | 6 | Lmo2     |
| 0.000321963248104255 | -0.594390166247729 | 1 | 6 | Ddah2    |
| 0.000326468034124602 | 0.477440268138808  | 1 | 6 | Cirbp    |
| 0.000328035957620828 | -1.22              | 1 | 6 | Gas7     |
| 0.000332109937483641 | 0.600351355767062  | 1 | 6 | Tcp1     |

|                      |                    |   |   |             |
|----------------------|--------------------|---|---|-------------|
| 0.000333336199761523 | -0.672942496471462 | 1 | 6 | Sra1        |
| 0.000333650174213258 | -0.682500864943683 | 1 | 6 | Arid1b      |
| 0.000334578735683065 | 0.326881910586337  | 1 | 6 | Fry         |
| 0.000336693546276056 | 0.376061162952591  | 1 | 6 | Rheb        |
| 0.000339933820496183 | -1.92              | 1 | 6 | Lcn2        |
| 0.000341349384834302 | 0.588092121292785  | 1 | 6 | Thoc7       |
| 0.000346663226134331 | -1.38              | 1 | 6 | Papss2      |
| 0.000347645876334911 | 0.694607461193271  | 1 | 6 | Rhobtb1     |
| 0.000347723617338093 | -1.05              | 1 | 6 | Atp6v1b2    |
| 0.000350220557894509 | -0.631194330940307 | 1 | 6 | Acap2       |
| 0.000355422523496636 | 0.724013968868887  | 1 | 6 | Gmpr2       |
| 0.000360112432014239 | 0.610455639357045  | 1 | 6 | Cdk2ap2     |
| 0.00036377669621556  | -1.26              | 1 | 6 | Slc22a17    |
| 0.000365828115576329 | -0.761678983512419 | 1 | 6 | Zcchc11     |
| 0.000371065012093796 | -0.996170124490676 | 1 | 6 | Ndufa4l2    |
| 0.000377628111423648 | -0.623065498423667 | 1 | 6 | Ppp1r10     |
| 0.000381180112268513 | -0.622921033423011 | 1 | 6 | Kazald1     |
| 0.000382438227099272 | 0.888497185096305  | 1 | 6 | Gbe1        |
| 0.000384309898846438 | -0.661566564504482 | 1 | 6 | Fam46a      |
| 0.000386886388621924 | 0.87               | 1 | 6 | BC005624    |
| 0.000388007069669542 | 0.517406313393244  | 1 | 6 | Esd         |
| 0.000388426995280145 | -0.886523771734632 | 1 | 6 | Zswim6      |
| 0.000389824604590376 | -0.762431712189285 | 1 | 6 | Pld1        |
| 0.000391106460882877 | -1.88              | 1 | 6 | Col2a1      |
| 0.000397627428579937 | -0.984941581028601 | 1 | 6 | Alkbh5      |
| 0.000401238581730617 | -0.920740801850544 | 1 | 6 | Art4        |
| 0.000404839441232128 | -1.26              | 1 | 6 | Kcne4       |
| 0.000405049058848017 | -1.19              | 1 | 6 | Sos1        |
| 0.000406963855542411 | 0.823354279616497  | 1 | 6 | Rab3a       |
| 0.000412558706484097 | -1.11              | 1 | 6 | St3gal1     |
| 0.000415733132140955 | 0.391282945820642  | 1 | 6 | Rps27l      |
| 0.000416871469394799 | -1.26              | 1 | 6 | Thbs1       |
| 0.000418527031881928 | -0.669226163348237 | 1 | 6 | Rsl1d1      |
| 0.00041889557068194  | 0.30               | 1 | 6 | Ttc39b      |
| 0.000421783360440227 | 0.551274904651834  | 1 | 6 | 2010107E04F |
| 0.000429167283250961 | -0.735870062770104 | 1 | 6 | Hand2       |
| 0.000429682927241405 | 0.630151491090843  | 1 | 6 | St3gal5     |
| 0.000430361992743766 | 0.49               | 1 | 6 | Prkag2      |
| 0.000430928806484209 | -0.976738445456361 | 1 | 6 | Epc2        |
| 0.000432178422572323 | 0.54               | 1 | 6 | Spag7       |
| 0.000432522583524241 | 0.536691106869041  | 1 | 6 | Mlf2        |
| 0.000432765746466035 | 0.389470286811177  | 1 | 6 | Atp1a2      |
| 0.000432832924107692 | -1.44              | 1 | 6 | Fam19a5     |
| 0.000437190757012079 | 0.630845335309498  | 1 | 6 | Ift46       |
| 0.00044189807247795  | -1.44              | 1 | 6 | Ssc5d       |
| 0.000442584769315221 | -0.610375777299413 | 1 | 6 | Arl5b       |
| 0.0004426105340493   | 0.443259765261591  | 1 | 6 | 9530068E07F |
| 0.000443393723433493 | 0.426860409382944  | 1 | 6 | Fra10ac1    |
| 0.000447845488947989 | 0.728272305730597  | 1 | 6 | Sort1       |
| 0.000450092130169939 | -0.66              | 1 | 6 | Ripk1       |
| 0.000451834987653593 | -1.32              | 1 | 6 | Ccl19       |
| 0.000451931484527733 | -0.506440839532188 | 1 | 6 | Txnrd1      |
| 0.000453483681634342 | 0.336437592370423  | 1 | 6 | Spcs1       |
| 0.000457644838672519 | 0.524394540163118  | 1 | 6 | Stip1       |
| 0.00046995210714588  | -1.00              | 1 | 6 | Tcf12       |
| 0.000470100199509542 | -0.871073240857857 | 1 | 6 | Copz1       |

|                      |                    |   |   |          |
|----------------------|--------------------|---|---|----------|
| 0.000470532047019837 | -1.43              | 1 | 6 | Isg20    |
| 0.00048442876564987  | 0.712021073663776  | 1 | 6 | Ndufb3   |
| 0.000493186380189935 | -1.19              | 1 | 6 | Pcdh18   |
| 0.000495637702398063 | 0.495223082989361  | 1 | 6 | Lamtor5  |
| 0.000503427088542977 | -2.10              | 1 | 6 | Icam2    |
| 0.000503933873261032 | -1.32              | 1 | 6 | Smarcd2  |
| 0.00050469984297583  | 0.25               | 1 | 6 | Macf1    |
| 0.000505962184434242 | -1.36              | 1 | 6 | Naalad2  |
| 0.000506176520529712 | 0.433809765123228  | 1 | 6 | Slc25a5  |
| 0.000515485048627598 | -0.90              | 1 | 6 | Elk3     |
| 0.000515561554396495 | 0.580506647591143  | 1 | 6 | Ech1     |
| 0.000516881897507091 | -0.519038970027357 | 1 | 6 | Srm2     |
| 0.00051726416879015  | -0.616516972633192 | 1 | 6 | Arpc5    |
| 0.000520287277544671 | -1.26              | 1 | 6 | Abcb1b   |
| 0.000522243691034594 | 0.335792153938801  | 1 | 6 | Vdac1    |
| 0.000537550100258193 | 0.481576169148179  | 1 | 6 | Pmvk     |
| 0.000541451645653476 | -1.09              | 1 | 6 | Ptgir    |
| 0.000548490897954446 | -1.37              | 1 | 6 | Angptl1  |
| 0.000549976687243876 | 0.269272345248984  | 1 | 6 | Cav2     |
| 0.000551108290736956 | -0.975800579033571 | 1 | 6 | Dchs1    |
| 0.000551190732642394 | 0.44               | 1 | 6 | Pgrmc1   |
| 0.000553660105787248 | -0.655812703891946 | 1 | 6 | Smad4    |
| 0.000554144846817422 | -0.636098124670072 | 1 | 6 | Eif4g3   |
| 0.000555702400892751 | 0.819536404349084  | 1 | 6 | Pon3     |
| 0.000572952508649484 | -1.18              | 1 | 6 | Atp1b1   |
| 0.000575427730685383 | -0.77              | 1 | 6 | Scarf2   |
| 0.000576490140467943 | -1.73              | 1 | 6 | Procr    |
| 0.000576519092037379 | -1.61              | 1 | 6 | Enpp3    |
| 0.000576782794500058 | -0.854727356620305 | 1 | 6 | Sfxn1    |
| 0.000577352562574584 | -1.08              | 1 | 6 | Tenm3    |
| 0.000581253249381571 | 0.618845182021713  | 1 | 6 | Ppp1r12c |
| 0.000582461830707683 | 1.03               | 1 | 6 | Tctex1d2 |
| 0.000587904507214284 | -0.414267859368751 | 1 | 6 | Serpnb6a |
| 0.000590324792022028 | -0.476170124448644 | 1 | 6 | Ghr      |
| 0.000591321021472997 | 0.461037379481844  | 1 | 6 | Vasp     |
| 0.000598859600739637 | -1.04              | 1 | 6 | Dnmt3a   |
| 0.000601022224622058 | -0.665970906871809 | 1 | 6 | Gbbp1    |
| 0.000607738071542934 | 0.577882180438227  | 1 | 6 | Rps29    |
| 0.000613879321737932 | 0.389014750409195  | 1 | 6 | Nkiras1  |
| 0.00061732369002865  | 0.48               | 1 | 6 | Bloc1s1  |
| 0.0006234253682006   | 0.401170092547261  | 1 | 6 | Paip2    |
| 0.000630876646326724 | -0.634347305582358 | 1 | 6 | Emilin1  |
| 0.000633936123872627 | 0.662168431803105  | 1 | 6 | Arl4a    |
| 0.000634461272377083 | 0.360584127228367  | 1 | 6 | Ano10    |
| 0.000634535075085975 | -0.59              | 1 | 6 | Atxn7l3b |
| 0.000635741897419194 | -1.09              | 1 | 6 | Lsamp    |
| 0.000639896870244942 | -0.928058141668742 | 1 | 6 | Naglu    |
| 0.000650838832581176 | -0.380561738204351 | 1 | 6 | App      |
| 0.000652889780447437 | 0.550018757635725  | 1 | 6 | Psmb3    |
| 0.000653324576630561 | -0.877970918588878 | 1 | 6 | Pla2g16  |
| 0.000653952801347966 | 0.467412848461894  | 1 | 6 | Psma7    |
| 0.000659274744481896 | -0.451377498537449 | 1 | 6 | Fkbp2    |
| 0.000661403954986627 | -0.655456179149887 | 1 | 6 | Nfe2l2   |
| 0.000661431345583519 | 0.285585495420233  | 1 | 6 | Shisa3   |
| 0.000667456625033693 | -1.40              | 1 | 6 | Lamc1    |
| 0.0006759416999001   | -0.682094391978409 | 1 | 6 |          |

|                      |                    |   |   |          |
|----------------------|--------------------|---|---|----------|
| 0.000676253006510603 | 0.496446132534267  | 1 | 6 | Eif3g    |
| 0.000676822198548891 | 0.399456590623184  | 1 | 6 | Sgcb     |
| 0.000677499976238689 | -0.644613169945674 | 1 | 6 | Acdbd3   |
| 0.000678397244152892 | 0.718511373293983  | 1 | 6 | Gne      |
| 0.000678732169407546 | -1.06              | 1 | 6 | Man2b2   |
| 0.000679142121653784 | -0.662231117367405 | 1 | 6 | Mpp6     |
| 0.000688779081445082 | -0.623170721184018 | 1 | 6 | Pde4b    |
| 0.000695647491382204 | 0.410940164167028  | 1 | 6 | Cox7b    |
| 0.000702795987109463 | -1.02              | 1 | 6 | Sec14l1  |
| 0.000710573224192994 | -0.893975802109582 | 1 | 6 | Trove2   |
| 0.000713345421698309 | 0.541480428236219  | 1 | 6 | Ran      |
| 0.000720942963284401 | 0.484127814580692  | 1 | 6 | Cd59a    |
| 0.000722185222939286 | -0.97              | 1 | 6 | Birc2    |
| 0.000722879443897679 | 0.33               | 1 | 6 | Pnpla2   |
| 0.000748269118208113 | -0.420351743830951 | 1 | 6 | Atp6ap2  |
| 0.000752353171238722 | -0.698120159708725 | 1 | 6 | Ankrd17  |
| 0.000757712359718234 | 0.46               | 1 | 6 | Wtip     |
| 0.000764029083478335 | 0.369461406424789  | 1 | 6 | Mob4     |
| 0.00076583322578119  | -1.22              | 1 | 6 | Myo6     |
| 0.000766956376281528 | -1.51              | 1 | 6 | Rtp4     |
| 0.000768525202154249 | -0.663874750765471 | 1 | 6 | Cebpb    |
| 0.000769154691074487 | -0.300612729752579 | 1 | 6 | Lpgat1   |
| 0.000771169719185911 | -1.92              | 1 | 6 | Cd93     |
| 0.000776028561552727 | -1.18              | 1 | 6 | Arhgap31 |
| 0.000783837575512002 | -0.831672425996839 | 1 | 6 | Zfc3h1   |
| 0.000786478397462217 | 0.968363431230193  | 1 | 6 | Prps2    |
| 0.000788016201348333 | -1.13              | 1 | 6 | Atf5     |
| 0.00079157718633877  | -0.720984077768752 | 1 | 6 | Sh3d19   |
| 0.000798291019368259 | -1.21              | 1 | 6 | Kctd12   |
| 0.000798799906638179 | -0.452344479873483 | 1 | 6 | Prrc2c   |
| 0.000802789948752398 | -1.34              | 1 | 6 | Pecam1   |
| 0.000808351854497182 | 0.302901503890747  | 1 | 6 | Tomm7    |
| 0.00081546362314434  | -0.753801308125577 | 1 | 6 | Dpagt1   |
| 0.000819308743416604 | -1.38              | 1 | 6 | Nsg1     |
| 0.00083530224674319  | -1.52              | 1 | 6 | Gprc5b   |
| 0.00083720713977826  | 0.88               | 1 | 6 | Cisd1    |
| 0.000837530077855315 | -0.381703041558725 | 1 | 6 | Mbd1     |
| 0.000852113133109959 | 0.364003851320845  | 1 | 6 | Srf      |
| 0.000852189534823186 | 0.332084728033207  | 1 | 6 | Trappc8  |
| 0.000854102125405419 | 0.503235667226517  | 1 | 6 | Dnajc8   |
| 0.000856233874265991 | -1.23              | 1 | 6 | Spry1    |
| 0.000866520804636588 | 0.292720023513221  | 1 | 6 | Tbca     |
| 0.000874500794060404 | 0.52               | 1 | 6 | Rps25    |
| 0.000880874935158213 | -0.53              | 1 | 6 | Mbtps1   |
| 0.000883819718980682 | -0.452167508977654 | 1 | 6 | Qpct     |
| 0.000885208131550177 | -0.403161945539925 | 1 | 6 | Pdia3    |
| 0.000885330191477127 | -0.883111767438964 | 1 | 6 | Rab23    |
| 0.000886986732289775 | -0.70              | 1 | 6 | Rbm28    |
| 0.000893718429631101 | -0.943826954654887 | 1 | 6 | Cebpg    |
| 0.000898751357999827 | 0.764357761419402  | 1 | 6 | Higd2a   |
| 0.000899955707607283 | -1.04              | 1 | 6 | Trim2    |
| 0.000902964541368591 | 0.312813722483212  | 1 | 6 | Grcc10   |
| 0.000904024176334895 | 0.536512850515426  | 1 | 6 | Pdgfd    |
| 0.000921582146987716 | -0.377566130768909 | 1 | 6 | Dnajb11  |
| 0.000923092229761494 | -1.03              | 1 | 6 | Rasa1    |
| 0.000926872767501546 | 0.658848752747026  | 1 | 6 | Xirp1    |



|                      |                    |   |   |          |
|----------------------|--------------------|---|---|----------|
| 0.000930477675822095 | 0.95               | 1 | 6 | Mif4gd   |
| 0.000937724687233155 | 0.524672135889036  | 1 | 6 | Mgat4a   |
| 0.000943526644056845 | 1.07               | 1 | 6 | Tmem80   |
| 0.000949461257573404 | -0.447774435426549 | 1 | 6 | Kmt2e    |
| 0.000952697115404364 | -0.917971195131708 | 1 | 6 | Prpf40a  |
| 0.000961827994174035 | 0.526981539302702  | 1 | 6 | Deb1     |
| 0.000963382681680552 | -0.845875156551462 | 1 | 6 | Nnmt     |
| 0.00096450827060335  | -0.960391469113584 | 1 | 6 | Per1     |
| 0.000969523894884298 | -1.24              | 1 | 6 | Piezo1   |
| 0.000970031387407205 | -0.99              | 1 | 6 | Usp24    |
| 0.000979766794097374 | 0.650275942503181  | 1 | 6 | Lxn      |
| 0.000980362465580868 | -0.597476633929037 | 1 | 6 | Adamts10 |
| 0.000984719383130494 | 0.26               | 1 | 6 | Fau      |
| 0.00098784416600125  | 0.376143181424679  | 1 | 6 | Sh3pxd2a |
| 0.000990639515970258 | 0.76               | 1 | 6 | Rnd3     |
| 0.000997097101907073 | -0.832294588717727 | 1 | 6 | Sh3kbp1  |
| 0.00100541802867534  | 0.419731723071256  | 1 | 6 | Bnip3    |
| 0.00101097047383424  | -1.18              | 1 | 6 | Lamc3    |
| 0.00101418261348082  | -0.991402373537819 | 1 | 6 | Irgm1    |
| 0.00101754370544357  | -1.05              | 1 | 6 | Elmsan1  |
| 0.00102061210979455  | -0.853026741267882 | 1 | 6 | Lifr     |
| 0.001023859696475    | -0.518437032797755 | 1 | 6 | Shmt2    |
| 0.00104013681779107  | 0.315095536713552  | 1 | 6 | Txn1     |
| 0.00104961483509979  | -0.58              | 1 | 6 | Klf9     |
| 0.00105154077334714  | -0.286440969901524 | 1 | 6 | Laptm4a  |
| 0.00105560020912381  | 0.505713814951072  | 1 | 6 | Maf      |
| 0.00105843089347569  | -1.49              | 1 | 6 | Gfra2    |
| 0.00106264198626619  | -1.46              | 1 | 6 | Aff3     |
| 0.00106475751391485  | 0.306297660615514  | 1 | 6 | Rpl37a   |
| 0.00107256287059056  | -0.811431844140182 | 1 | 6 | Stx5a    |
| 0.00107274280537434  | -0.601761433384637 | 1 | 6 | Hexb     |
| 0.00107377043741153  | -0.775283743928064 | 1 | 6 | Grb10    |
| 0.00107820024249404  | 0.485497592035004  | 1 | 6 | Mdh1     |
| 0.00107912632492618  | 0.349062338018161  | 1 | 6 | Bcas2    |
| 0.00108644634224356  | -1.16              | 1 | 6 | Pcdh9    |
| 0.0010867852341184   | -0.403060246720889 | 1 | 6 | Fgfr1    |
| 0.00110555414045684  | -1.05              | 1 | 6 | Ilgp1    |
| 0.0011244702110192   | -1.42              | 1 | 6 | Slc16a9  |
| 0.00112902981851758  | 0.33               | 1 | 6 | Ktn1     |
| 0.00114146704470834  | -1.37              | 1 | 6 | Slc9a3r2 |
| 0.00114749958567455  | -0.822626562181038 | 1 | 6 | Fkbp10   |
| 0.00115143820002865  | 0.691281334678593  | 1 | 6 | Mrpl28   |
| 0.00115392597716459  | 0.555744212443314  | 1 | 6 | Ube2d2a  |
| 0.00115501598442282  | -0.865690540193241 | 1 | 6 | Acsl5    |
| 0.00115667462387196  | 0.333201475896899  | 1 | 6 | Afap1    |
| 0.00118074690109646  | -0.964885542899691 | 1 | 6 | Ppp1r14b |
| 0.00119540996102854  | 0.48               | 1 | 6 | Nxt2     |
| 0.00120065265555956  | 0.57               | 1 | 6 | Srp14    |
| 0.00120349066355601  | -0.341578383414261 | 1 | 6 | Ltbp4    |
| 0.00121099953488521  | -0.675623620511562 | 1 | 6 | Glul     |
| 0.0012127293858966   | 0.456496058839454  | 1 | 6 | Hipk1    |
| 0.00121358975836849  | -0.673328899087873 | 1 | 6 | Trim35   |
| 0.00121667452651718  | -0.789997541271125 | 1 | 6 | Pld3     |
| 0.00122380825703676  | 0.455365536263495  | 1 | 6 | BC002163 |
| 0.0012257352581729   | -0.698447999216968 | 1 | 6 | Peak1    |
| 0.00122617766057626  | -1.68              | 1 | 6 | Enc1     |

|                     |                    |   |   |             |
|---------------------|--------------------|---|---|-------------|
| 0.00124806044757212 | -1.52              | 1 | 6 | Adcy4       |
| 0.00124987734945323 | 0.607163556872898  | 1 | 6 | Mrpl51      |
| 0.00125796427332197 | 0.592848024493704  | 1 | 6 | Ehbp11i     |
| 0.00126212120485007 | -0.396038984403706 | 1 | 6 | Acvr1       |
| 0.00126489212122302 | -0.536774743107474 | 1 | 6 | Lrp6        |
| 0.0012652133353535  | -1.52              | 1 | 6 | Tmod2       |
| 0.00127115073245961 | 0.613997483553056  | 1 | 6 | Mrps24      |
| 0.00128333919737131 | 0.715452938074244  | 1 | 6 | Unc45a      |
| 0.00130559711493383 | -0.541483848363618 | 1 | 6 | Antxr1      |
| 0.00134306304309273 | 0.578569996648961  | 1 | 6 | 2700060E02F |
| 0.00134963224212789 | -0.755133488224217 | 1 | 6 | Fndc3a      |
| 0.00136868599028128 | 0.808168482522488  | 1 | 6 | Gm561       |
| 0.00137307086746607 | -0.958536885492759 | 1 | 6 | Tex261      |
| 0.00138287777501272 | 0.415692028042356  | 1 | 6 | Chd6        |
| 0.001392169072874   | 0.372312900791264  | 1 | 6 | Dek         |
| 0.00139746215247723 | 0.32               | 1 | 6 | Psmb2       |
| 0.00141418739962654 | -0.885524521089408 | 1 | 6 | Tm9sf4      |
| 0.00141436748344387 | -0.598254697116402 | 1 | 6 | Mcfid2      |
| 0.0014246411839223  | 0.272275639095025  | 1 | 6 | Rabac1      |
| 0.00146324229432715 | -0.428989551253498 | 1 | 6 | Tmed3       |
| 0.00147138206573298 | 0.557133995455755  | 1 | 6 | Prkaca      |
| 0.00148445630209519 | -0.423546787539217 | 1 | 6 | Nucks1      |
| 0.00148729659944999 | -0.962634619851267 | 1 | 6 | Usp2        |
| 0.00148798833615253 | 0.534209305952828  | 1 | 6 | Fam188a     |
| 0.00149393971347111 | 0.336437124878087  | 1 | 6 | Fam199x     |
| 0.00149673178451134 | 1.30               | 1 | 6 | Ubxn7       |
| 0.00149817389006773 | -0.913830737348445 | 1 | 6 | Fbxw8       |
| 0.00151188021917754 | 0.309283018473968  | 1 | 6 | Mbnl2       |
| 0.00151874254153047 | 1.14               | 1 | 6 | Vps37b      |
| 0.00152349324347993 | -0.744387088404367 | 1 | 6 | Ifih1       |
| 0.00153301027673643 | -1.69              | 1 | 6 | Tspan11     |
| 0.00153486065615069 | 0.357627896398524  | 1 | 6 | Ano1        |
| 0.00153590507952522 | -1.33              | 1 | 6 | Terf2       |
| 0.00155910345826036 | -1.14              | 1 | 6 | Neat1       |
| 0.0015883569219499  | 0.365791045293291  | 1 | 6 | Ivd         |
| 0.00159585816525162 | -1.20              | 1 | 6 | Ndst1       |
| 0.00160629889620279 | 0.492547668847998  | 1 | 6 | Zbtb8os     |
| 0.00161099336332217 | 0.367189340285801  | 1 | 6 | Tgfbr1      |
| 0.00161827848928735 | -1.08              | 1 | 6 | Cyp2j6      |
| 0.00162364498403347 | -0.376521893546771 | 1 | 6 | 0610031J06F |
| 0.00162750027792792 | -0.610905734796126 | 1 | 6 | Leprel2     |
| 0.00164828664788721 | 0.496195102784008  | 1 | 6 | Tbc1d1      |
| 0.00165040126297079 | 0.370803213345257  | 1 | 6 | Itpr1       |
| 0.00165437312905872 | 0.752989841748472  | 1 | 6 | Trp53inp2   |
| 0.00166524439507773 | 0.386630834613907  | 1 | 6 | Wbp2        |
| 0.00166708209476725 | 0.600033711117786  | 1 | 6 | Ngfrap1     |
| 0.00168868244035841 | -1.03              | 1 | 6 | Setd5       |
| 0.00169599139168525 | -0.466086684120271 | 1 | 6 | Hn1         |
| 0.00173023021474624 | -0.520826784019858 | 1 | 6 | Col5a2      |
| 0.00174237542239042 | 0.291459040181878  | 1 | 6 | Lats2       |
| 0.00174249128540674 | 0.526343782967502  | 1 | 6 | Mrpl42      |
| 0.00176641103060274 | -1.76              | 1 | 6 | Tmem158     |
| 0.00177380579025676 | 0.646995825514582  | 1 | 6 | Skap2       |
| 0.00178013578018229 | 0.77               | 1 | 6 | Tmed4       |
| 0.00179562703146526 | -0.820049418720629 | 1 | 6 | Numb        |
| 0.00180757915402375 | -0.967022292674386 | 1 | 6 | Ptpn1       |

|                     |                    |   |   |             |
|---------------------|--------------------|---|---|-------------|
| 0.00181748489046187 | -0.899270859113894 | 1 | 6 | Plat        |
| 0.00181894491278255 | -0.49              | 1 | 6 | Phldb1      |
| 0.00182652990914259 | -0.81              | 1 | 6 | Zmym2       |
| 0.00182698917204657 | -1.08              | 1 | 6 | Phlda3      |
| 0.00183097099168518 | 0.259987745273699  | 1 | 6 | Arpc4       |
| 0.00185254027789489 | -1.61              | 1 | 6 | Vwf         |
| 0.00187552516312989 | -1.42              | 1 | 6 | Bdh2        |
| 0.0018800306523809  | -0.677096094903199 | 1 | 6 | Mettl7a1    |
| 0.00188115339603737 | -1.76              | 1 | 6 | Ccnd1       |
| 0.00189237215217924 | -0.607895244606057 | 1 | 6 | Slc7a1      |
| 0.00189495735540076 | -0.818406416196256 | 1 | 6 | Acsl4       |
| 0.00190755589998996 | -0.803331318682628 | 1 | 6 | Bclaf1      |
| 0.00190785012093223 | 0.39               | 1 | 6 | Hyal1       |
| 0.0019098979973911  | -1.53              | 1 | 6 | 4632428N05F |
| 0.00191527427362976 | -0.902870810256203 | 1 | 6 | Tmem55b     |
| 0.00192550847956516 | -0.591211379583932 | 1 | 6 | Vat1        |
| 0.00192665044643129 | -0.673797634127727 | 1 | 6 | Kcmf1       |
| 0.00193455288509936 | -1.36              | 1 | 6 | Tmem140     |
| 0.00193942623932808 | 0.506680886423788  | 1 | 6 | Hsph1       |
| 0.00194491853209381 | -0.559239656670352 | 1 | 6 | Thbs3       |
| 0.00195876965535962 | 0.981643995706568  | 1 | 6 | Stk16       |
| 0.0019790451766975  | -0.744688858070184 | 1 | 6 | Ibtk        |
| 0.00199351801466623 | 0.454330716535963  | 1 | 6 | Commd3      |
| 0.00202439811413576 | -0.711922228281359 | 1 | 6 | Mia3        |
| 0.00202795660849034 | -0.684866757001197 | 1 | 6 | Fam149a     |
| 0.00203205783612785 | -0.858511492510471 | 1 | 6 | Lrrc32      |
| 0.00204379595133733 | 0.464308908945904  | 1 | 6 | Med28       |
| 0.00204616230839566 | 0.311300072942273  | 1 | 6 | Col4a5      |
| 0.00205250593810225 | 0.790134251944447  | 1 | 6 | Snx4        |
| 0.00206741620605034 | -0.682019976696453 | 1 | 6 | Olfm1       |
| 0.00209766048391577 | 0.433969342993941  | 1 | 6 | Ccm2        |
| 0.002111480205959   | -0.708079993928142 | 1 | 6 | Fam178a     |
| 0.00214075195423291 | -0.575635524554708 | 1 | 6 | Slc50a1     |
| 0.00215712036253334 | -1.08              | 1 | 6 | Loxl2       |
| 0.00215891051268634 | 0.58               | 1 | 6 | Bmpr1b      |
| 0.00215975466153581 | 0.419382729503565  | 1 | 6 | Cuedc1      |
| 0.00217469888268513 | 0.656943257259888  | 1 | 6 | Emi1        |
| 0.00219085675305728 | 0.655165586664179  | 1 | 6 | Pcif1       |
| 0.00220455983603046 | 0.404553705219727  | 1 | 6 | Cep104      |
| 0.00220798469228703 | -0.568133108899204 | 1 | 6 | Zbed6       |
| 0.00220820925481247 | -0.703799512143943 | 1 | 6 | Stox2       |
| 0.00221925342773239 | -0.713674581664623 | 1 | 6 | Midn        |
| 0.00223277571877807 | 0.256825754628787  | 1 | 6 | Hif1a       |
| 0.00227224860970693 | -1.48              | 1 | 6 | Sele        |
| 0.00227303523901936 | -1.94              | 1 | 6 | AW112010    |
| 0.00228777322595646 | 0.440757439726146  | 1 | 6 | Selt        |
| 0.00228924610695441 | -1.48              | 1 | 6 | Arhgap20    |
| 0.00230554320594371 | -0.47              | 1 | 6 | Tmem205     |
| 0.00230612637866718 | -0.988424732261967 | 1 | 6 | Ephb3       |
| 0.00232132437911238 | 0.425990687660907  | 1 | 6 | Psmd4       |
| 0.00234399480476428 | -0.977683109710015 | 1 | 6 | Usp33       |
| 0.00235610454493052 | -0.524416936455973 | 1 | 6 | Bptf        |
| 0.00235799532844326 | -1.06              | 1 | 6 | Mid1ip1     |
| 0.00236620144436382 | 0.349447461197837  | 1 | 6 | Atp6v1f     |
| 0.00236665116421691 | 0.502159495415002  | 1 | 6 | Vamp2       |
| 0.00237325955846357 | 0.484991210523118  | 1 | 6 | Uqcrcq      |

|                     |                    |   |   |             |
|---------------------|--------------------|---|---|-------------|
| 0.00237887992064754 | 0.504250455234726  | 1 | 6 | Tmt112      |
| 0.00239088601938844 | 0.487910359624429  | 1 | 6 | Pold4       |
| 0.00240068986749186 | -1.76              | 1 | 6 | Has1        |
| 0.00240722211292431 | 0.651315866796274  | 1 | 6 | Mrps18c     |
| 0.00241360725157496 | -0.804884526699702 | 1 | 6 | Plod1       |
| 0.00243184836279941 | -1.07              | 1 | 6 | Slc7a2      |
| 0.00244283558205295 | -0.867410676024137 | 1 | 6 | Adam17      |
| 0.00244305963524131 | -1.09              | 1 | 6 | Arhgef40    |
| 0.00245337564183107 | -0.661292256514996 | 1 | 6 | Kcnj8       |
| 0.00248184860253128 | 0.438216169345043  | 1 | 6 | Cct7        |
| 0.00252034210013589 | 1.01               | 1 | 6 | Fem1a       |
| 0.00254020997203172 | 0.289733630138134  | 1 | 6 | Slc48a1     |
| 0.0025500957049595  | 0.266454411863382  | 1 | 6 | Aktip       |
| 0.00255304961592104 | -1.36              | 1 | 6 | Sbno2       |
| 0.00255680894685324 | 0.459283946255752  | 1 | 6 | Plekha3     |
| 0.00258728922006918 | 0.299285108634267  | 1 | 6 | Rnf44       |
| 0.00262621274735338 | -0.96              | 1 | 6 | Cln5        |
| 0.00263487648617845 | 0.553321973938815  | 1 | 6 | Snhg9       |
| 0.00263588067161487 | 0.605040833954541  | 1 | 6 | Med9        |
| 0.00263717771329513 | -1.45              | 1 | 6 | H2-Ab1      |
| 0.00265995395772226 | -2.17              | 1 | 6 | Egfl7       |
| 0.00268875048875499 | 0.768925548329507  | 1 | 6 | Marf1       |
| 0.00269115541093616 | 0.718984735063727  | 1 | 6 | Dpp3        |
| 0.00269868868722609 | -1.50              | 1 | 6 | Ifi203      |
| 0.00270594075545345 | 0.267336870491271  | 1 | 6 | Rasl11a     |
| 0.00270967460206983 | -1.58              | 1 | 6 | AI507597    |
| 0.00273657446235219 | -0.804183657500146 | 1 | 6 | Arnt        |
| 0.00275797024723498 | 0.653840040718049  | 1 | 6 | Mrpl21      |
| 0.00277449931121312 | 0.458637603456131  | 1 | 6 | Ptges3      |
| 0.0028189229404537  | -0.996714935182441 | 1 | 6 | Sp1         |
| 0.00282402165312065 | 0.764151384367797  | 1 | 6 | Zfp467      |
| 0.00284340281984655 | 0.287721608613536  | 1 | 6 | Nsa2        |
| 0.0028442507353923  | 0.736084077620484  | 1 | 6 | Arl2        |
| 0.00284753826597096 | 0.792465539846235  | 1 | 6 | Thyn1       |
| 0.00286653324787446 | -0.908147001540814 | 1 | 6 | Cdk16       |
| 0.00286969183883499 | -0.923107044574174 | 1 | 6 | Cndp2       |
| 0.00286994790346451 | -1.15              | 1 | 6 | Chst11      |
| 0.00287906350070843 | -1.27              | 1 | 6 | Il4ra       |
| 0.00296158626339964 | 0.683205765017719  | 1 | 6 | Plcb3       |
| 0.00297556171292694 | 0.321878349701585  | 1 | 6 | Sharpin     |
| 0.00298222861253378 | 0.395120307971681  | 1 | 6 | Tpt1        |
| 0.00298553370343396 | 0.996455459051983  | 1 | 6 | 2610002J02F |
| 0.00298706001152424 | 0.287874802268599  | 1 | 6 | Akr1a1      |
| 0.00298938858228805 | -1.02              | 1 | 6 | Cpeb1       |
| 0.00302154336212689 | 0.388088286758818  | 1 | 6 | Mgll        |
| 0.00307907223871081 | 0.290774705226737  | 1 | 6 | Pbrm1       |
| 0.00309892908174178 | 0.446584136247557  | 1 | 6 | Ecm2        |
| 0.00315437305532029 | -0.511198937744598 | 1 | 6 | Zcchc24     |
| 0.00317305944527798 | 0.551374710031427  | 1 | 6 | Parp8       |
| 0.00318288811803808 | -0.798901957293918 | 1 | 6 | Slc25a25    |
| 0.00319138032985004 | -0.773596140939471 | 1 | 6 | Ube2l6      |
| 0.00319678143551945 | 0.486599523393425  | 1 | 6 | Cops6       |
| 0.00321025339288414 | 0.546397290674469  | 1 | 6 | Me2         |
| 0.00321058609504554 | -1.59              | 1 | 6 | Cxcl14      |
| 0.00321875678531788 | -0.426260081268238 | 1 | 6 | Derl1       |
| 0.00325510927122398 | -0.321120782043335 | 1 | 6 | Atf4        |

|                     |                    |   |   |             |
|---------------------|--------------------|---|---|-------------|
| 0.00328229694745544 | 0.355596516490124  | 1 | 6 | Dnajc10     |
| 0.00333018493676837 | -0.50              | 1 | 6 | Arglu1      |
| 0.00333598995750896 | -0.682765343311807 | 1 | 6 | Serpinb9    |
| 0.00340313300747039 | 0.462488660146955  | 1 | 6 | Hspb8       |
| 0.00340461499249459 | -0.520018943517071 | 1 | 6 | Prrc1       |
| 0.0034134305537123  | -0.861271285423824 | 1 | 6 | Smad3       |
| 0.00342519802390464 | 0.519530114709307  | 1 | 6 | Timm17a     |
| 0.00344763076602882 | -0.55              | 1 | 6 | Ckap4       |
| 0.00346983021328087 | -0.510854561018274 | 1 | 6 | Zmiz1       |
| 0.00348171211449414 | -0.500376882318496 | 1 | 6 | Dnttip2     |
| 0.00351212800797506 | 0.655109391419406  | 1 | 6 | Nr1h2       |
| 0.0035170987525664  | -0.29              | 1 | 6 | Tecpr1      |
| 0.00353867381907694 | -0.501423352052865 | 1 | 6 | Fech        |
| 0.00357150860756184 | -1.29              | 1 | 6 | Fnbp1l      |
| 0.0036169224792459  | 0.293284561358493  | 1 | 6 | Actr3       |
| 0.00362605873855113 | -1.57              | 1 | 6 | Itm2a       |
| 0.00364080630964804 | -0.488147467451038 | 1 | 6 | Rab6b       |
| 0.00367159089291101 | 0.412545247819389  | 1 | 6 | Cdc37l1     |
| 0.0036716128984547  | -1.20              | 1 | 6 | Tmem173     |
| 0.00368540777047627 | 0.472697052100347  | 1 | 6 | 4930503E24F |
| 0.00372199443850755 | -0.663970692212096 | 1 | 6 | Arpc1a      |
| 0.00376518442686947 | 0.61               | 1 | 6 | Mycbp       |
| 0.00376638643238482 | -1.44              | 1 | 6 | Tbx20       |
| 0.00378383634284425 | -0.485584775208895 | 1 | 6 | Rela        |
| 0.00379554590598214 | -0.395961727753718 | 1 | 6 | Wdr26       |
| 0.00381529379604339 | 0.333958544661117  | 1 | 6 | Wdr83os     |
| 0.00382560077103037 | 0.578610634971657  | 1 | 6 | Hibadh      |
| 0.00383530076372211 | -0.656987587986617 | 1 | 6 | Rnf145      |
| 0.00383811712152391 | -1.07              | 1 | 6 | Dram1       |
| 0.00386753038979684 | -1.23              | 1 | 6 | Ptgs1       |
| 0.00389589352963876 | -0.313077211708022 | 1 | 6 | Timp3       |
| 0.00391031563823835 | -0.408170643380502 | 1 | 6 | Lrig1       |
| 0.00391128873976283 | 0.767394319208728  | 1 | 6 | Crtc3       |
| 0.00395854009487157 | -0.338815360097175 | 1 | 6 | Ddost       |
| 0.0039675616128289  | 0.287651233160465  | 1 | 6 | Atp5f1      |
| 0.00398370333094117 | -0.279174852717906 | 1 | 6 | Rhbdf1      |
| 0.00398886882400151 | 0.817602275938214  | 1 | 6 | Rwdd4a      |
| 0.0039987541928574  | 0.314406576722069  | 1 | 6 | S100a1      |
| 0.00401525637098829 | -0.82              | 1 | 6 | Notch1      |
| 0.00402170103460274 | -1.05              | 1 | 6 | Dact1       |
| 0.0040379980408065  | 0.329300642874121  | 1 | 6 | Rpl10       |
| 0.00405877502584773 | 0.62               | 1 | 6 | Tada3       |
| 0.00406818682059378 | -0.470985702797329 | 1 | 6 | Mmp23       |
| 0.00412293217796149 | -1.22              | 1 | 6 | Glb1        |
| 0.0041519039863911  | 0.534859682519143  | 1 | 6 | Banf1       |
| 0.00417248655655858 | 0.549088793194354  | 1 | 6 | Vps25       |
| 0.00417572276188165 | -0.499592582877906 | 1 | 6 | Nipbl       |
| 0.00418900334610308 | -0.840277186403464 | 1 | 6 | Snap47      |
| 0.0043028304496053  | -1.15              | 1 | 6 | Siah2       |
| 0.00431632982496613 | 0.639904956758345  | 1 | 6 | Mrpl32      |
| 0.00432995735477577 | 0.476156588415628  | 1 | 6 | Idh2        |
| 0.00435762820803291 | 0.868264533720019  | 1 | 6 | Srd         |
| 0.00443238880055596 | -0.484228357705927 | 1 | 6 | Dnajc3      |
| 0.00445057163509788 | 0.59               | 1 | 6 | Cnot10      |
| 0.00445927646756999 | -0.295114618911438 | 1 | 6 | 1300002E11F |
| 0.00447076744718999 | -0.490993522436299 | 1 | 6 | Pnrc1       |



|                     |                    |   |   |             |
|---------------------|--------------------|---|---|-------------|
| 0.00447522218708193 | -0.846999933548544 | 1 | 6 | Mdfic       |
| 0.00447588392614342 | -1.16              | 1 | 6 | Map3k3      |
| 0.00447762477586445 | -0.571534152519337 | 1 | 6 | Map4k5      |
| 0.00448995504628113 | 0.537137125405103  | 1 | 6 | Arc         |
| 0.00454077523957365 | -0.914067824307503 | 1 | 6 | Sdccag3     |
| 0.00454782679228736 | 0.438838536817386  | 1 | 6 | Pias1       |
| 0.00458232739312023 | -0.685539969886912 | 1 | 6 | Sptlc2      |
| 0.00460549451822498 | 0.616265083676059  | 1 | 6 | Rbbp9       |
| 0.00464098927964555 | 0.340448442761836  | 1 | 6 | Pitpna      |
| 0.00466734612587196 | -0.523173829131219 | 1 | 6 | Srm         |
| 0.00467901239143247 | -0.949092389734478 | 1 | 6 | Zfp655      |
| 0.00468945877989671 | 0.74               | 1 | 6 | Mrpl18      |
| 0.00472815161184173 | -0.417976092724305 | 1 | 6 | Usp7        |
| 0.00474038628311171 | 0.328790501628591  | 1 | 6 | Acadl       |
| 0.00475045317801224 | -0.558949752273749 | 1 | 6 | Arsb        |
| 0.00480312285409954 | 0.736164478752694  | 1 | 6 | Crat        |
| 0.00482131338989223 | 0.28               | 1 | 6 | Gid4        |
| 0.00488759122446789 | 0.757921735913311  | 1 | 6 | Pigyl       |
| 0.00495764799024575 | 0.342267487869564  | 1 | 6 | Tnfaip8     |
| 0.00497634021195799 | 0.902558350242235  | 1 | 6 | Arhgef10l   |
| 0.00500589372497804 | 0.72               | 1 | 6 | Myo1e       |
| 0.00501056830872662 | -0.39              | 1 | 6 | Smc6        |
| 0.00502219165156998 | -0.460118333749167 | 1 | 6 | Fbn1        |
| 0.00503050285980499 | -1.37              | 1 | 6 | Myoc        |
| 0.00503218914666391 | -1.39              | 1 | 6 | Golm1       |
| 0.0050411857174933  | -0.359172255211659 | 1 | 6 | Nr4a1       |
| 0.00504409114808784 | 0.407330105864267  | 1 | 6 | Btf3        |
| 0.00507616181513832 | 0.526424084431874  | 1 | 6 | Cab39       |
| 0.00507842188445553 | -0.42              | 1 | 6 | Thoc2       |
| 0.00508727464066337 | 0.371514236183695  | 1 | 6 | 1110059E24F |
| 0.0051027499676063  | -0.420221724544573 | 1 | 6 | Srsf11      |
| 0.00512744883459789 | -0.405840707791613 | 1 | 6 | Ldha        |
| 0.00512780102839879 | 0.55               | 1 | 6 | Dnal1       |
| 0.00517947779668827 | -1.10              | 1 | 6 | Man1c1      |
| 0.00519800630637612 | 0.31               | 1 | 6 | Cetn3       |
| 0.00519879493295639 | -0.418698618465194 | 1 | 6 | Elf2        |
| 0.00521499362677614 | -0.553512995906706 | 1 | 6 | Colec12     |
| 0.00523812336662382 | 0.554081192366384  | 1 | 6 | Sap30bp     |
| 0.00525461948887625 | 0.809322222080609  | 1 | 6 | Dnajc11     |
| 0.00530716406936886 | -1.32              | 1 | 6 | Metml       |
| 0.00532124713254554 | -0.777974835703651 | 1 | 6 | Ehd1        |
| 0.00533144620164935 | 0.466748379070849  | 1 | 6 | Mif         |
| 0.00533397297666865 | -1.15              | 1 | 6 | Ppp1r15b    |
| 0.00537643602046421 | -0.578261536197827 | 1 | 6 | Cc2d2a      |
| 0.00543265664605088 | 0.722968422148796  | 1 | 6 | Fbxo21      |
| 0.00543562395112628 | -0.696092967537325 | 1 | 6 | P2rx4       |
| 0.00544319855720162 | -0.407062623424613 | 1 | 6 | Sde2        |
| 0.00547441589426576 | -1.19              | 1 | 6 | Sav1        |
| 0.00549639861893578 | 0.26               | 1 | 6 | Ndufa1      |
| 0.00550054965894942 | 0.382467194853659  | 1 | 6 | Hsp90aa1    |
| 0.00554740503397783 | 0.684248198646839  | 1 | 6 | Rps6ka4     |
| 0.00555100892133122 | 0.551632134175043  | 1 | 6 | Ppp3cb      |
| 0.00556906424090596 | 0.266542236565333  | 1 | 6 | Dad1        |
| 0.00557443826703764 | 0.942869158712843  | 1 | 6 | Etv1        |
| 0.00558300748708494 | -0.643078939899759 | 1 | 6 | Azin1       |
| 0.00559151822006167 | -1.29              | 1 | 6 | Esam        |

|                     |                    |   |   |             |
|---------------------|--------------------|---|---|-------------|
| 0.00560091262613108 | -0.704405511556489 | 1 | 6 | Rpl27a      |
| 0.00568437000902467 | -2.00              | 1 | 6 | Cdh5        |
| 0.00569439484787757 | -1.57              | 1 | 6 | Ism1        |
| 0.00569866363075961 | -1.07              | 1 | 6 | Nrip1       |
| 0.00571452097364504 | 0.456021431227559  | 1 | 6 | Ndufs7      |
| 0.00574092655896024 | -0.599566635092476 | 1 | 6 | Pak1ip1     |
| 0.00577062778349256 | -0.363214529879237 | 1 | 6 | Spag9       |
| 0.00577572449951731 | -0.465932351223908 | 1 | 6 | Camk2n1     |
| 0.00578801640359427 | 0.45               | 1 | 6 | Ppt1        |
| 0.00583924970854206 | -0.758602502128453 | 1 | 6 | Cyp27a1     |
| 0.00584025182576864 | -0.510710964590265 | 1 | 6 | Gypc        |
| 0.0058452024605872  | -0.625384381633862 | 1 | 6 | Cpd         |
| 0.00586568422147368 | -0.738074075028632 | 1 | 6 | Rassf1      |
| 0.00587934526836622 | 0.378674118740662  | 1 | 6 | Cct2        |
| 0.00595411028235072 | -1.22              | 1 | 6 | Gnptg       |
| 0.00596226704281594 | -0.62              | 1 | 6 | Socs2       |
| 0.00597402617854992 | -0.303892335105075 | 1 | 6 | Lztr1       |
| 0.00598416545102669 | -0.707722872471542 | 1 | 6 | Srek1       |
| 0.0060180385301073  | 0.456960830216764  | 1 | 6 | Ptbp2       |
| 0.00607048240364613 | -0.717510929895972 | 1 | 6 | NP-904339.1 |
| 0.00607493563780491 | 0.469582522591195  | 1 | 6 | Tmco1       |
| 0.00611853648081958 | -0.381937952116143 | 1 | 6 | Col3a1      |
| 0.00611911144935103 | 0.672920179580641  | 1 | 6 | Mpv17l2     |
| 0.00613580249590627 | 0.438945461127691  | 1 | 6 | Hebp1       |
| 0.00617448541801295 | 0.52               | 1 | 6 | Gcsh        |
| 0.00618021136383649 | 0.330072214775745  | 1 | 6 | 1810013L24F |
| 0.0061881699480389  | -1.42              | 1 | 6 | Rnf144a     |
| 0.0062275136328221  | 0.265847462880904  | 1 | 6 | Tma7        |
| 0.00625263086979743 | 0.840808715953557  | 1 | 6 | Pcbd2       |
| 0.00625497709532199 | -0.481748026046787 | 1 | 6 | Nktr        |
| 0.00626746048565906 | 0.647010411378387  | 1 | 6 | Sncg        |
| 0.00631226260484344 | -1.30              | 1 | 6 | Bach1       |
| 0.00631779064305656 | -0.584662630126925 | 1 | 6 | Hdac7       |
| 0.00633338531763113 | 0.495974288182644  | 1 | 6 | Atad1       |
| 0.00634659133652592 | 0.605473032114992  | 1 | 6 | Aldh6a1     |
| 0.00641161969021748 | -0.531177451731583 | 1 | 6 | Carhsp1     |
| 0.00642114479989468 | -0.930791822564955 | 1 | 6 | Rap2b       |
| 0.00645350212050368 | -0.486115694436128 | 1 | 6 | Tceal8      |
| 0.00646474795418536 | 0.252834923710015  | 1 | 6 | Hypk        |
| 0.0065208210126438  | -0.411794981589814 | 1 | 6 | Arpc1b      |
| 0.00655751496583505 | -0.28              | 1 | 6 | Nfix        |
| 0.00658509818058639 | -0.883953320610404 | 1 | 6 | Ncstn       |
| 0.00664248848270722 | -0.643496821919826 | 1 | 6 | Ptp4a1      |
| 0.00665064270377943 | 0.310472681275748  | 1 | 6 | Serhl       |
| 0.0066524012360032  | 0.345501643340607  | 1 | 6 | Tyw1        |
| 0.00676979807760387 | -0.999702047374669 | 1 | 6 | 4931406P16F |
| 0.00677301437363731 | 0.505541184330336  | 1 | 6 | Lamtor2     |
| 0.00682620822162269 | 0.300197384382102  | 1 | 6 | Arf1        |
| 0.0068311506522193  | 0.653185909485878  | 1 | 6 | Snhg3       |
| 0.00690249259932349 | 0.464778465573392  | 1 | 6 | Cabin1      |
| 0.00694832623802859 | -0.667037923840119 | 1 | 6 | Tgfb3       |
| 0.00698114258616238 | -0.766149707763836 | 1 | 6 | Cirh1a      |
| 0.00698233122272312 | -0.757580925458406 | 1 | 6 | Trib2       |
| 0.00702165490029568 | 0.48               | 1 | 6 | Cars2       |
| 0.00706923764096157 | -0.602753442856319 | 1 | 6 | Por         |
| 0.00710802417531784 | 0.539053660555265  | 1 | 6 | Csnk2a1     |

|                     |                    |   |   |          |
|---------------------|--------------------|---|---|----------|
| 0.0071176745638443  | 0.304445134743103  | 1 | 6 | Cnbp     |
| 0.00713544380486288 | -0.757906817590996 | 1 | 6 | Smad1    |
| 0.00713816839182996 | -0.489892815004547 | 1 | 6 | lfrd1    |
| 0.00715353390685013 | -0.62              | 1 | 6 | Hbp1     |
| 0.00716597084673883 | 1.16               | 1 | 6 | Plcl1    |
| 0.00718369582939398 | -0.384049623874866 | 1 | 6 | Vwa1     |
| 0.00720170387855392 | -0.637386803672809 | 1 | 6 | Hspa13   |
| 0.00725010065014327 | 0.464032226945758  | 1 | 6 | Bcl2l2   |
| 0.00726808954626692 | -0.943797847947397 | 1 | 6 | Lonrf3   |
| 0.00728618689980936 | 0.407363889077392  | 1 | 6 | Sntg2    |
| 0.00734262607407251 | -0.664948786590032 | 1 | 6 | Plk3     |
| 0.00737183398533685 | -1.80              | 1 | 6 | Fgd5     |
| 0.00737553489529951 | -0.999170678656911 | 1 | 6 | Steap3   |
| 0.00739812632625175 | -0.420044557871321 | 1 | 6 | Slc44a1  |
| 0.00740172122599652 | 0.253903723710823  | 1 | 6 | Hnmpk    |
| 0.00741588136898538 | 0.297903843641722  | 1 | 6 | Prss23   |
| 0.00743656771919348 | -0.446927730289008 | 1 | 6 | Amotl1   |
| 0.00744592839862284 | 0.602271923079149  | 1 | 6 | Mras     |
| 0.0075021881286717  | 0.337645452336456  | 1 | 6 | Hbegf    |
| 0.00753137624908947 | -0.312368177855258 | 1 | 6 | Ubn2     |
| 0.00757835577728313 | -0.899876075953451 | 1 | 6 | Elmod2   |
| 0.00759760724937743 | -1.40              | 1 | 6 | Chl1     |
| 0.00761943785749936 | -0.652573569162379 | 1 | 6 | Zkscan17 |
| 0.00767305059854885 | 0.435034394068396  | 1 | 6 | Ncoa3    |
| 0.00774440691993106 | -0.575951279023118 | 1 | 6 | Gpsm1    |
| 0.00775550003811308 | 0.36               | 1 | 6 | Chd3     |
| 0.00777596931977976 | 0.342318827842878  | 1 | 6 | Tnks     |
| 0.00784992172363976 | -0.654825126539826 | 1 | 6 | Creb3l1  |
| 0.007894399639379   | -0.649477149760606 | 1 | 6 | Naga     |
| 0.00795461569827644 | -1.05              | 1 | 6 | Phf11d   |
| 0.00802403604766408 | 0.46               | 1 | 6 | Cacybp   |
| 0.00808235377957593 | 0.388514875367544  | 1 | 6 | Rps27a   |
| 0.00808276236399856 | 0.447446953115006  | 1 | 6 | Chchd3   |
| 0.00809917537347324 | 0.354191293721472  | 1 | 6 | Rhoc     |
| 0.00810123707099042 | -1.70              | 1 | 6 | Car8     |
| 0.008107319347262   | -0.30              | 1 | 6 | Atp9a    |
| 0.00813378104232408 | -0.895871669368692 | 1 | 6 | Cdr2l    |
| 0.00813570032778875 | -0.814305779376278 | 1 | 6 | Slc20a1  |
| 0.00814193960807918 | -0.495966293470997 | 1 | 6 | Setbp1   |
| 0.00814328640629092 | -0.373398849125836 | 1 | 6 | Atrx     |
| 0.00814730931075331 | 0.480501367003817  | 1 | 6 | Gfra4    |
| 0.00816697984073502 | 0.584473728605578  | 1 | 6 | Dars     |
| 0.00826876126543035 | 0.99               | 1 | 6 | Tmem261  |
| 0.00828270769766177 | -0.631920451349505 | 1 | 6 | Pafah1b2 |
| 0.00831212671508312 | 0.784504321795256  | 1 | 6 | Mob2     |
| 0.00831261429334249 | -0.516333309347422 | 1 | 6 | Atp11a   |
| 0.00837214422101295 | -0.512403283241463 | 1 | 6 | Arf5     |
| 0.00839200061666761 | 0.397342195515716  | 1 | 6 | Rasl11b  |
| 0.00840413059469083 | -0.878733746749619 | 1 | 6 | Pim1     |
| 0.0084868783780202  | -1.07              | 1 | 6 | Pcsk6    |
| 0.0085735542886414  | 0.51               | 1 | 6 | Prpsap1  |
| 0.00863520740033964 | 0.347899841046203  | 1 | 6 | Snap23   |
| 0.008643813804221   | -0.683452258154592 | 1 | 6 | Sdpr     |
| 0.00865652262482112 | -1.01              | 1 | 6 | Mapk8    |
| 0.00869560171863148 | -0.86              | 1 | 6 | Parp9    |
| 0.00873199160200797 | 0.620567050340954  | 1 | 6 | Dnm1l    |

|                     |                    |   |   |             |
|---------------------|--------------------|---|---|-------------|
| 0.00874913571094588 | 0.311377805225706  | 1 | 6 | Map7d1      |
| 0.00878181643688353 | -0.493980536331055 | 1 | 6 | Pdcd11      |
| 0.0088913130227541  | -0.652724797896126 | 1 | 6 | Ccnl2       |
| 0.00892589701768925 | -1.47              | 1 | 6 | Mysm1       |
| 0.00893414101297008 | -1.33              | 1 | 6 | Tlr2        |
| 0.00895456904984314 | 0.35               | 1 | 6 | Emc2        |
| 0.00897187496025955 | -0.661180513633317 | 1 | 6 | Ugdh        |
| 0.00897833571917455 | 0.298673793318183  | 1 | 6 | Prkra       |
| 0.00900320338560473 | -0.721438916297196 | 1 | 6 | 9430020K01f |
| 0.00900890901269725 | -0.465716245145855 | 1 | 6 | Gna13       |
| 0.00903707284355915 | -1.07              | 1 | 6 | Msx1        |
| 0.00904761581867677 | 0.468221250741601  | 1 | 6 | Idh3a       |
| 0.00907042477975321 | -0.616285361117262 | 1 | 6 | Ppic        |
| 0.00913416723224837 | -0.787690185264355 | 1 | 6 | Gtf3c2      |
| 0.00913783762017805 | 0.344078155555753  | 1 | 6 | Fam149b     |
| 0.0092245208890353  | -0.455040716238961 | 1 | 6 | Phip        |
| 0.00925411497216753 | 0.606424769875645  | 1 | 6 | Med22       |
| 0.00926402833867204 | -1.38              | 1 | 6 | Angpt1      |
| 0.00926848555584202 | -0.57              | 1 | 6 | Sidt2       |
| 0.00927909469342221 | -1.11              | 1 | 6 | Pgap2       |
| 0.00928387479060062 | 0.509856373105657  | 1 | 6 | Dhrs1       |
| 0.00933914337957568 | -0.555970281631253 | 1 | 6 | Ddx58       |
| 0.00937955393799242 | 0.374098808977514  | 1 | 6 | Aqp1        |
| 0.00945022072056592 | 0.495638199153719  | 1 | 6 | Mrpl4       |
| 0.00946592333201767 | 0.370571109130474  | 1 | 6 | Capza2      |
| 0.00949483784429132 | 0.316821526066903  | 1 | 6 | Ccdc82      |
| 0.00949772446379001 | 0.493620833741536  | 1 | 6 | Tmem246     |
| 0.00951953674654007 | 0.558240613163689  | 1 | 6 | Pigp        |
| 0.00955335899383469 | 0.584513005327859  | 1 | 6 | N6amt1      |
| 0.00956641033408595 | -0.452091906044224 | 1 | 6 | Soga1       |
| 0.00957057399361193 | -0.285264792156097 | 1 | 6 | Usp16       |
| 0.00962660987945945 | -0.566085256636712 | 1 | 6 | Psmd3       |
| 0.00964832869756862 | 0.405339944751414  | 1 | 6 | Usp53       |
| 0.00973056659777927 | 0.378866022602754  | 1 | 6 | Mcm6        |
| 0.00975562913326475 | -0.611260174771025 | 1 | 6 | Stag1       |
| 0.00979272572140206 | -0.515753201087958 | 1 | 6 | Abhd11os    |
| 0.00981801575238949 | 0.410807051913878  | 1 | 6 | Ckb         |
| 0.00993222278074916 | 0.389605834155689  | 1 | 6 | Dgcr6       |
| 0.00995063354641645 | 0.395316181676926  | 1 | 6 | Synj2bp     |
| 0.00995805688930114 | 0.62               | 1 | 6 | Mzt1        |
| 0.00996651118772677 | -0.778190329724526 | 1 | 6 | Lrrc8a      |
