# Supplementary material for: Single-Cell Analysis Uncovers Osteoblast Factor Growth Differentiation Factor 10 as Mediator of Vascular Smooth Muscle Cell Phenotypic Modulation Associated with Plaque Rupture in Human Carotid Artery Disease
Source: MDPI journal article supplement (doi:10.3390/ijms23031796), 2022-02-04
Supplement: s1 [file s1]

## Supplementary Materials

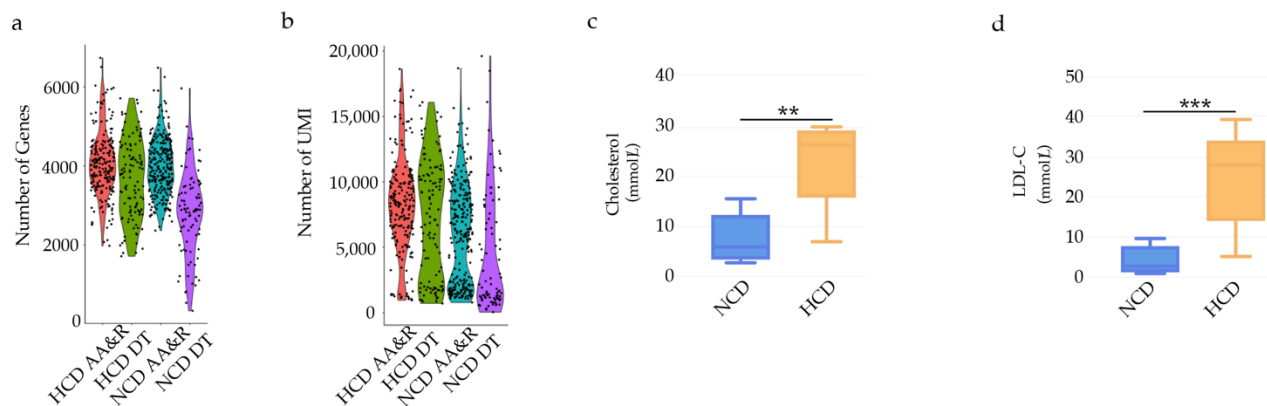

**Figure S1.** Quality control of the profiled scRNAseq transcriptomes of CD45<sup>+</sup> cells derived from atherosclerosis-prone AA&R, and atherosclerosis-resistant DT aorta of *Apoe*<sup>-/-</sup> mice on NCD and HCD and cholesterol levels. (a) Violin plots showing the quality control metrics of a number of genes per cell and (b) unique molecular identifiers (UMI) per cell,  $n = 6$  mice. (c) Bar graphs represent the mean  $\pm$  SEM (c) cholesterol; (d) LDL-C,  $n = 6$  mice/group,  $**p < 0.01$  and  $***p < 0.001$ .

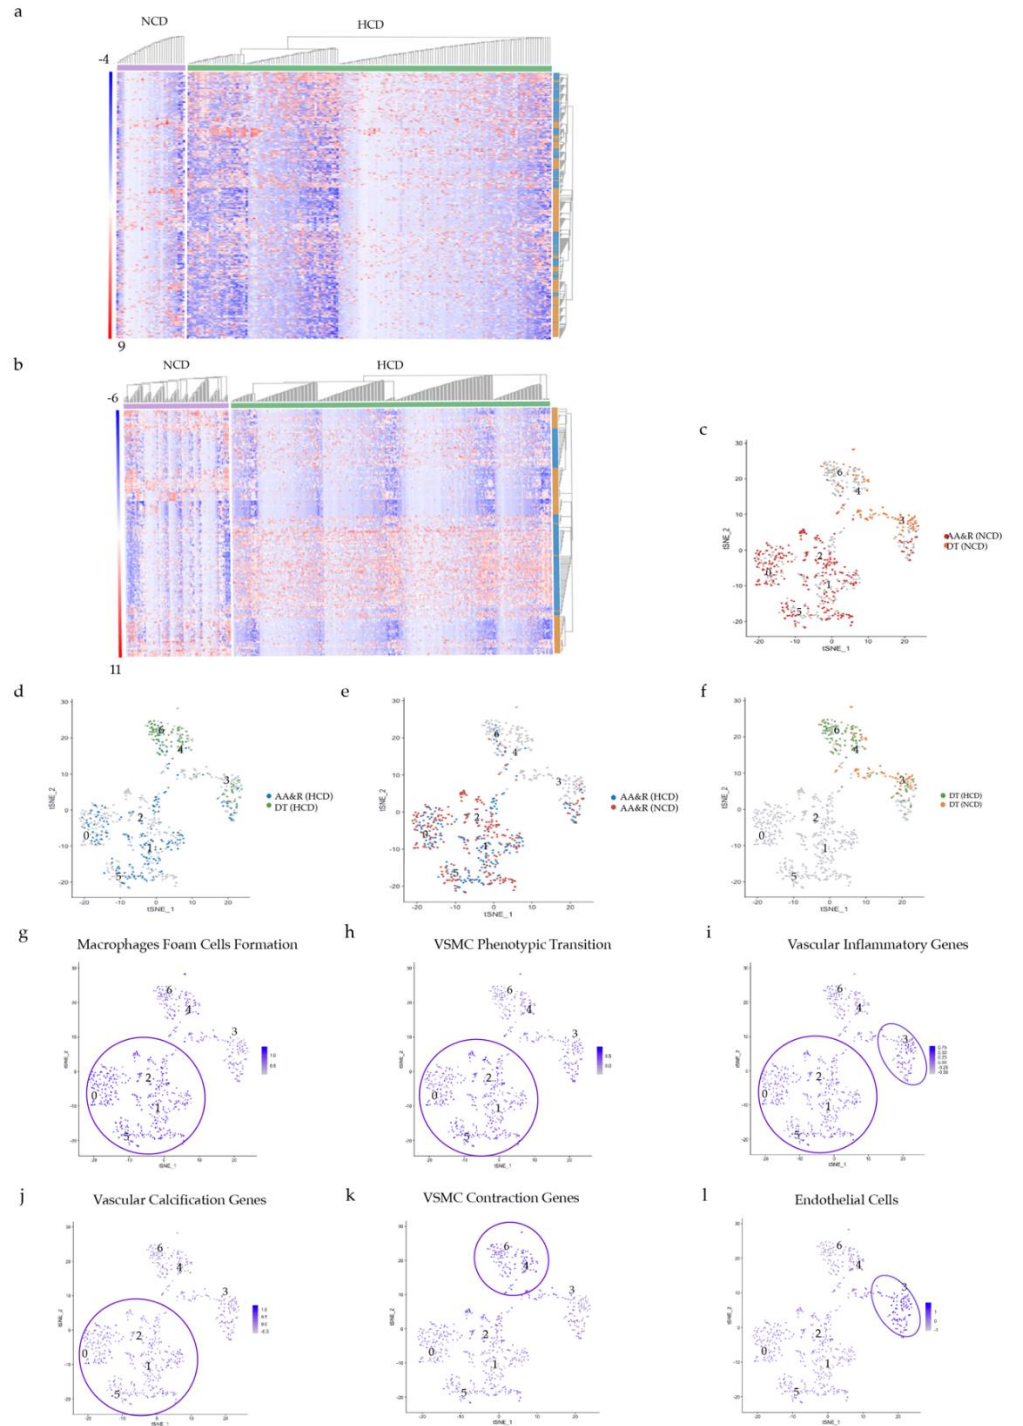

**Figure S2.** (a) Heatmap showing the expression of genes CD45<sup>+</sup> cells derived from AA&R of *Apoe*<sup>-/-</sup> on NCD versus HCD (HCD, red side strip or NCD, purple side strip) (p-Adj<0.05), *n*=6 mice/group. Rows represent genes and columns represent cells. (b) Heatmap showing the expression of genes CD45<sup>+</sup> cells derived from DT of *Apoe*<sup>-/-</sup> on NCD versus HCD (HCD, red side strip or NCD, purple side strip) (p-Adj<0.05), *n*=6 mice/group. Rows represent genes and columns represent cells. t-distributed stochastic neighbor embedding (tSNE) plot showing: (c) AA&R and DT aorta clusters of *Apoe*<sup>-/-</sup> mice on NCD; (d) AA&R and DT aorta of *Apoe*<sup>-/-</sup> mice on HCD; (e) AA&R clusters of *Apoe*<sup>-/-</sup> mice on HCD and NCD; (f) DT clusters of *Apoe*<sup>-/-</sup> mice on HCD and NCD. Predefined gene sets were overlaid on single cells on a tSNE plot to identify the cell identity of clusters with an enrichment of indicated gene sets (g) Macrophage foam cell formation; (h) VSMC phenotypic transition; (i) Vascular inflammation genes; (j) Vascular calcification gene; (k) VSMC contraction genes; (l) Endothelial cell.

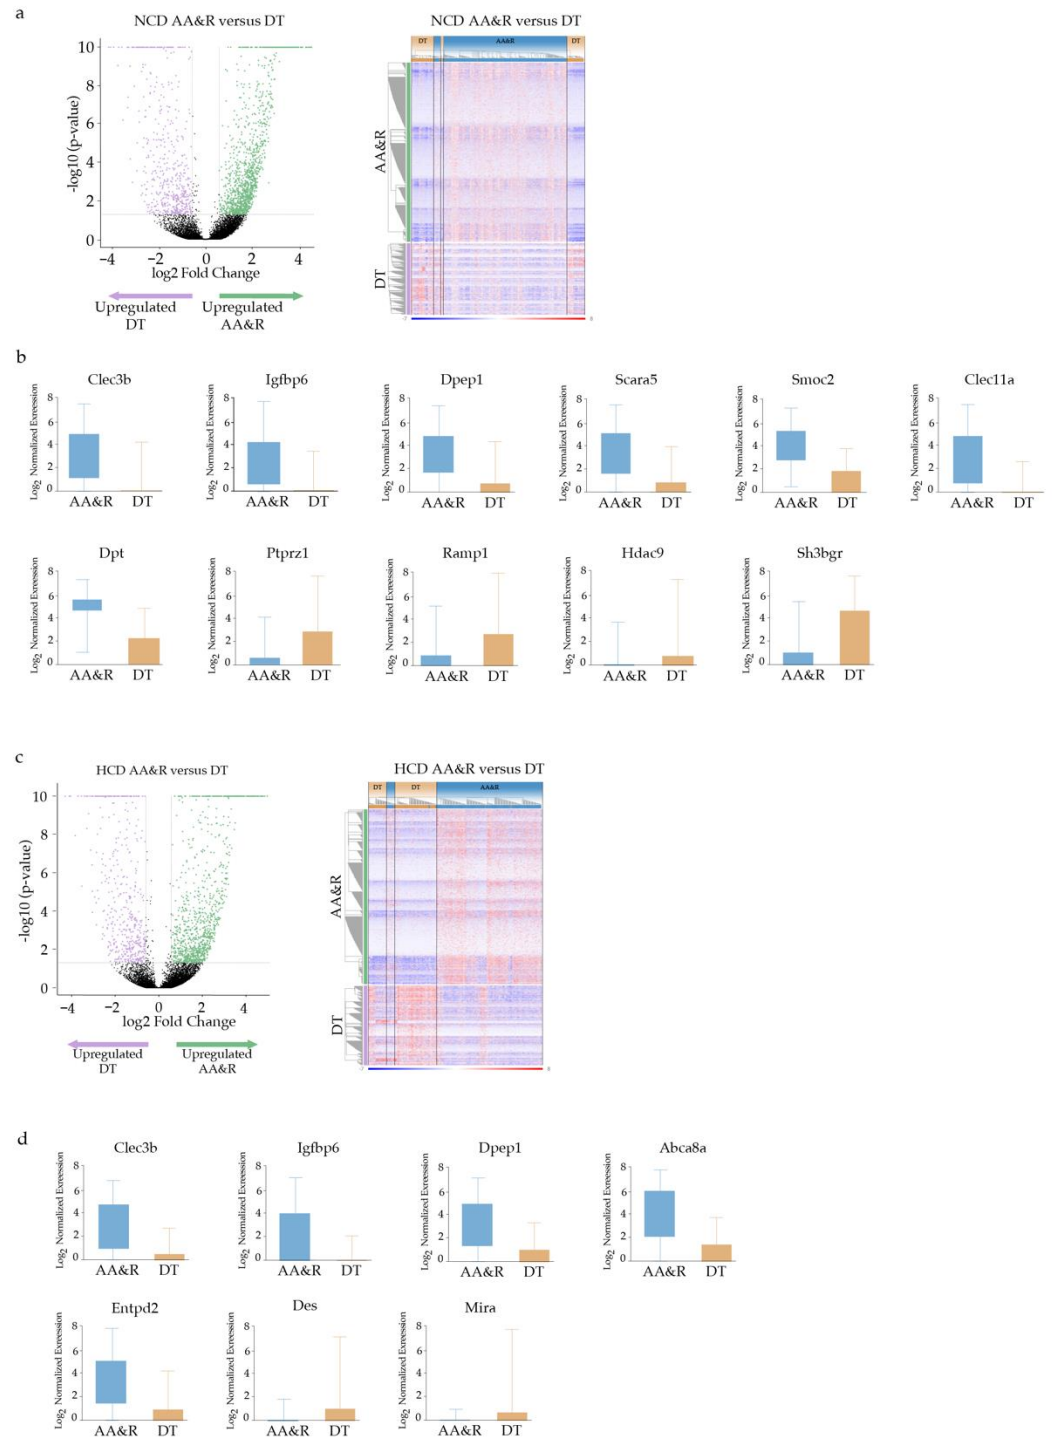

**Figure S3. (a)** Volcano plot showing significance ( $-\log_{10} p\text{-value}$ ) versus relative gene expression of CD45<sup>+</sup> cells derived from AA&R of  $\text{Apoe}^{-/-}$  versus DT derived from  $\text{Apoe}^{-/-}$  on NCD. Each dot represents a gene within the performed comparison ( $p\text{-Adj}<0.05$ ,  $\text{Log}_2>\pm 4$ ),  $n=6$  mice. Rows represent genes and columns represent cells. Heatmap showing the expression of genes (HCD, red side strip or NCD, purple side strip) ( $p\text{-Adj}<0.05$ ). **(b)** Genes of interest with significant differences in expression of CD45<sup>+</sup> cells derived from AA&R of  $\text{Apoe}^{-/-}$  versus DT derived from  $\text{Apoe}^{-/-}$  on NCD are labelled and presented as graphs, ( $p\text{-Adj}<0.05$ ),  $n=6$  mice. **(c)** Volcano plot showing significance ( $-\log_{10} p\text{-value}$ ) versus relative gene expression of CD45<sup>+</sup> cells derived from AA&R of  $\text{Apoe}^{-/-}$  versus DT derived from  $\text{Apoe}^{-/-}$  on HCD. Each dot represents a gene within the performed comparison ( $p\text{-Adj}<0.05$ ,  $\text{Log}_2>\pm 4$ ),  $n=6$  mice. Rows represent genes and columns represent cells. Heatmap showing the expression of genes ( $p\text{-Adj}<0.05$ ). **(d)** Genes of interest with highly significant differences in expression of CD45<sup>+</sup> cells derived from AA&R of  $\text{Apoe}^{-/-}$  versus DT derived from  $\text{Apoe}^{-/-}$  on HCD are labelled and presented as graphs, ( $p\text{-Adj}<0.05$ ),  $n=6$  mice.

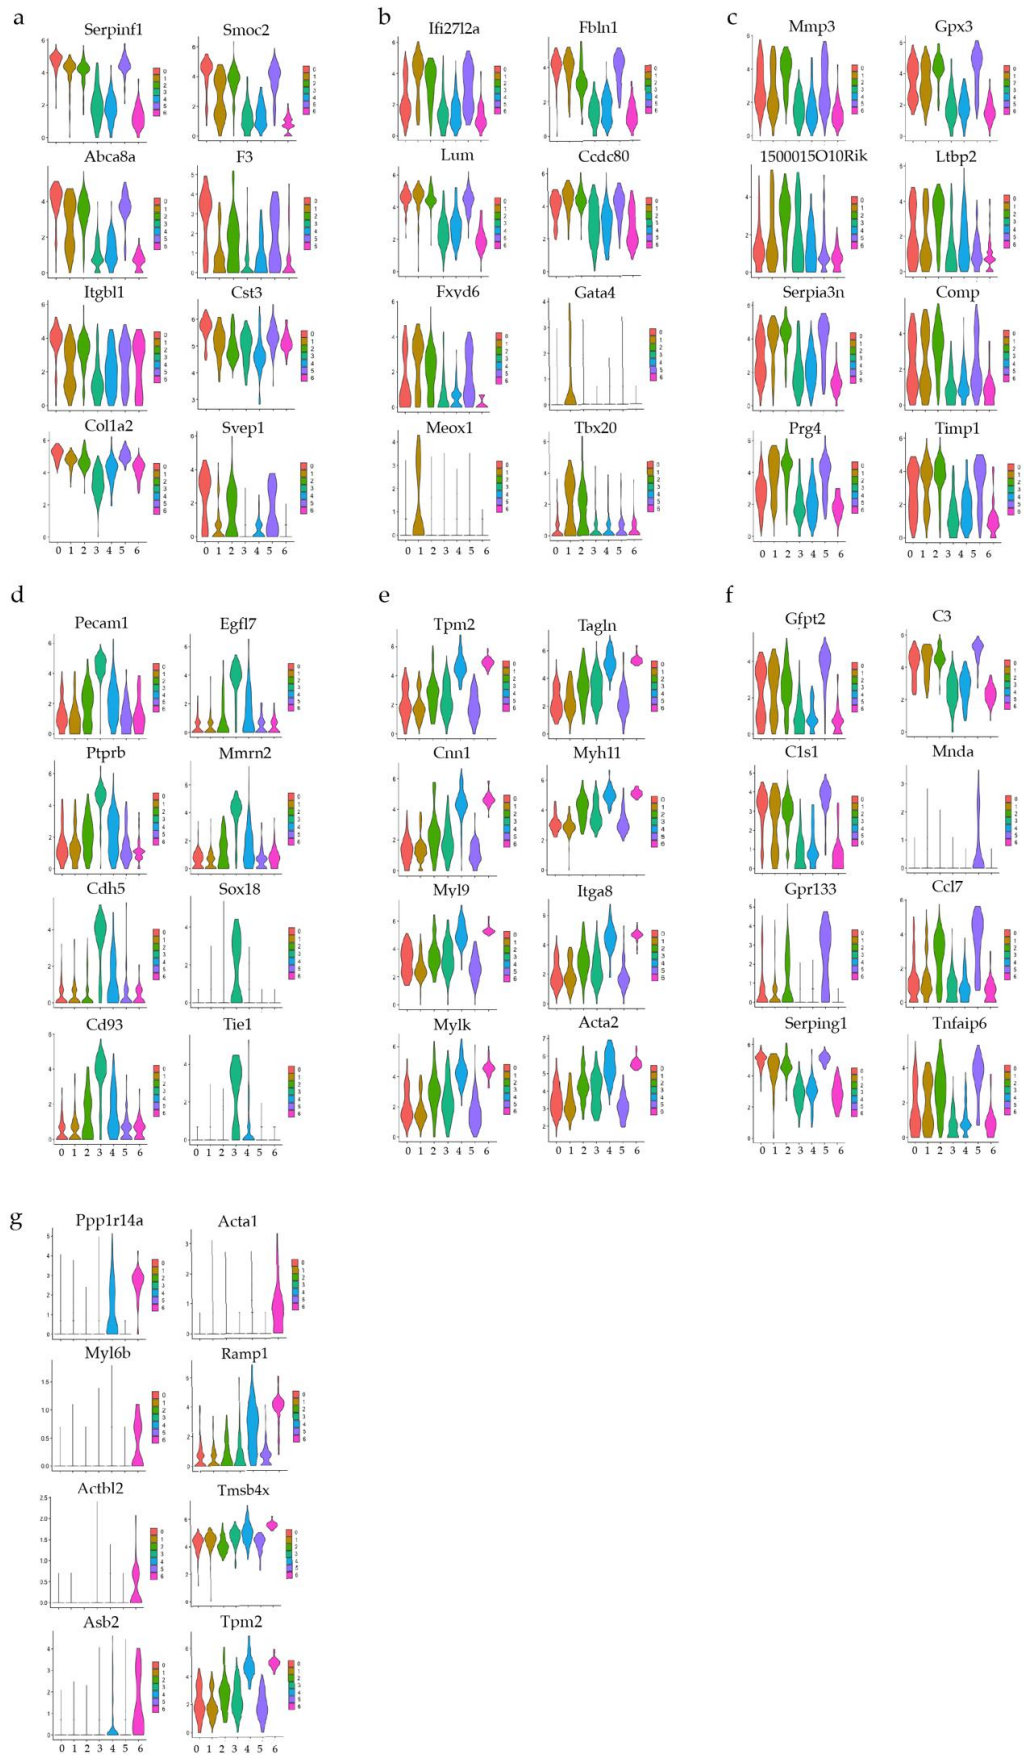

**Figure S4.** Top eight expressed genes per cluster: (a) cluster 0; (b) cluster 1; (c) cluster 2; (d) cluster 3; (e) cluster 4; (f) cluster 5; (g) cluster 6.

a

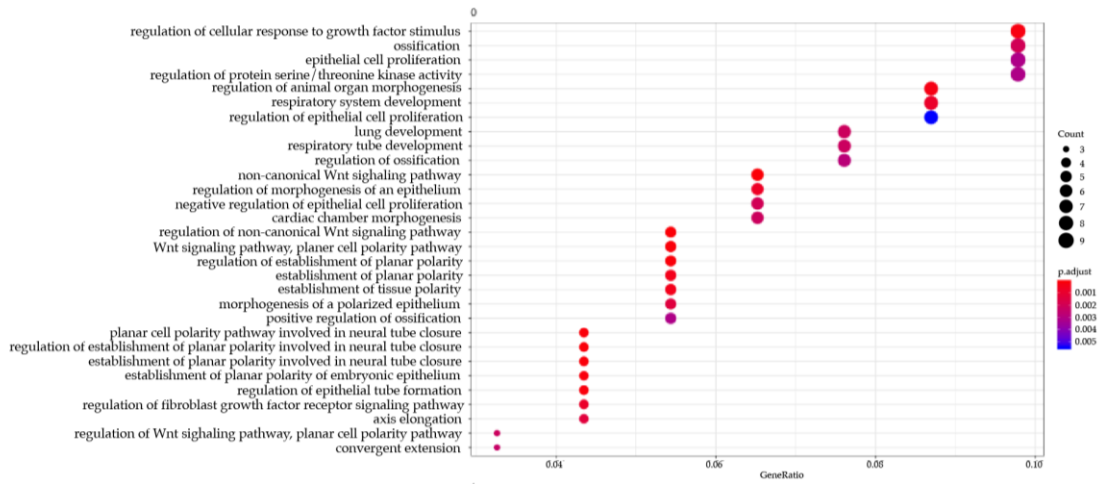

b

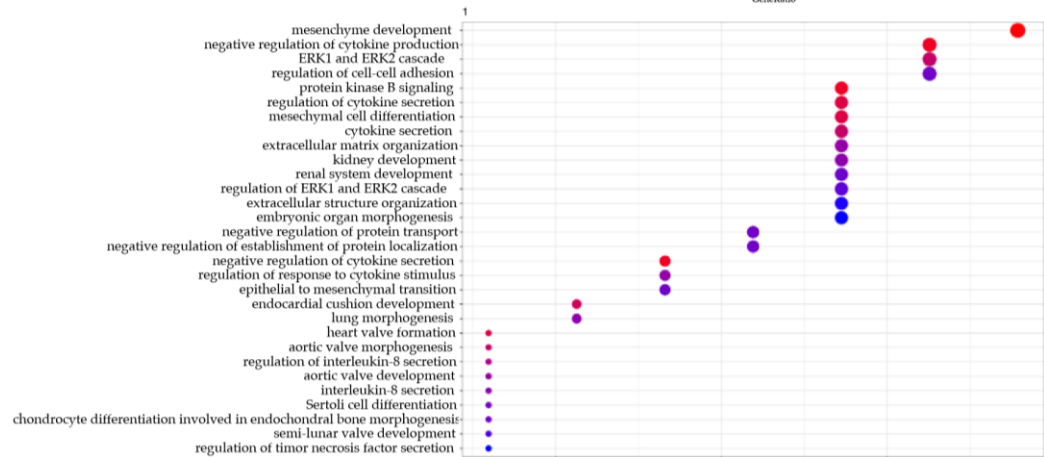

c

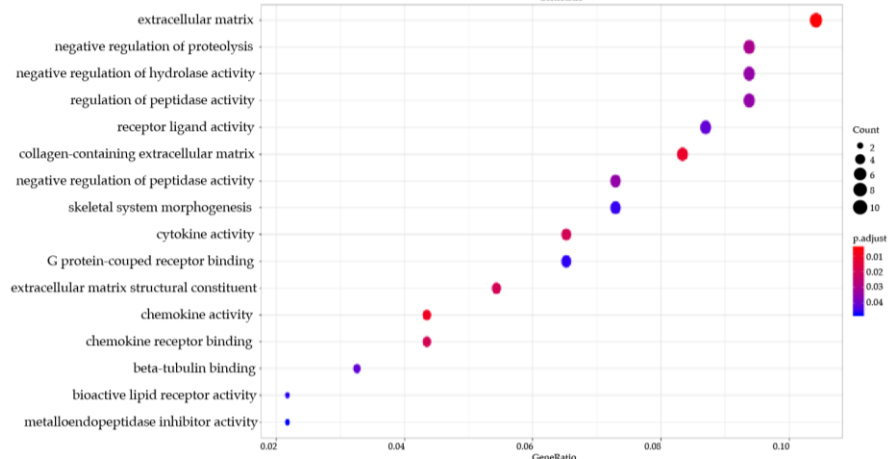

d

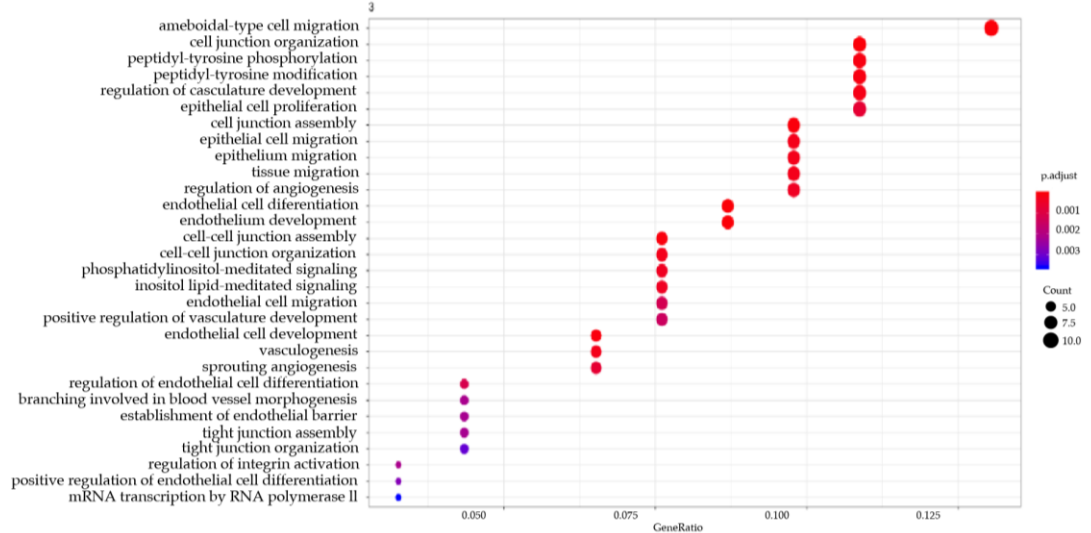



e

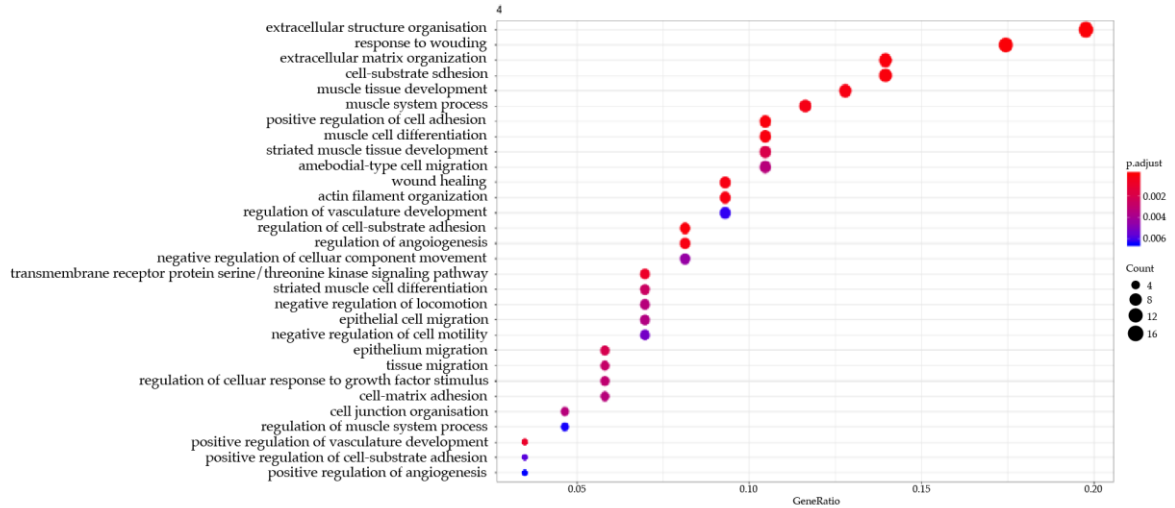

f

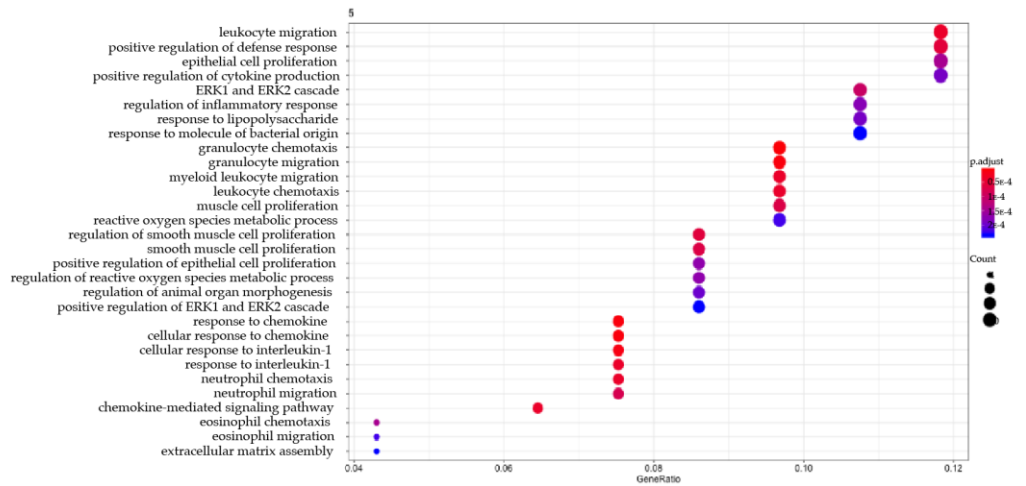

g

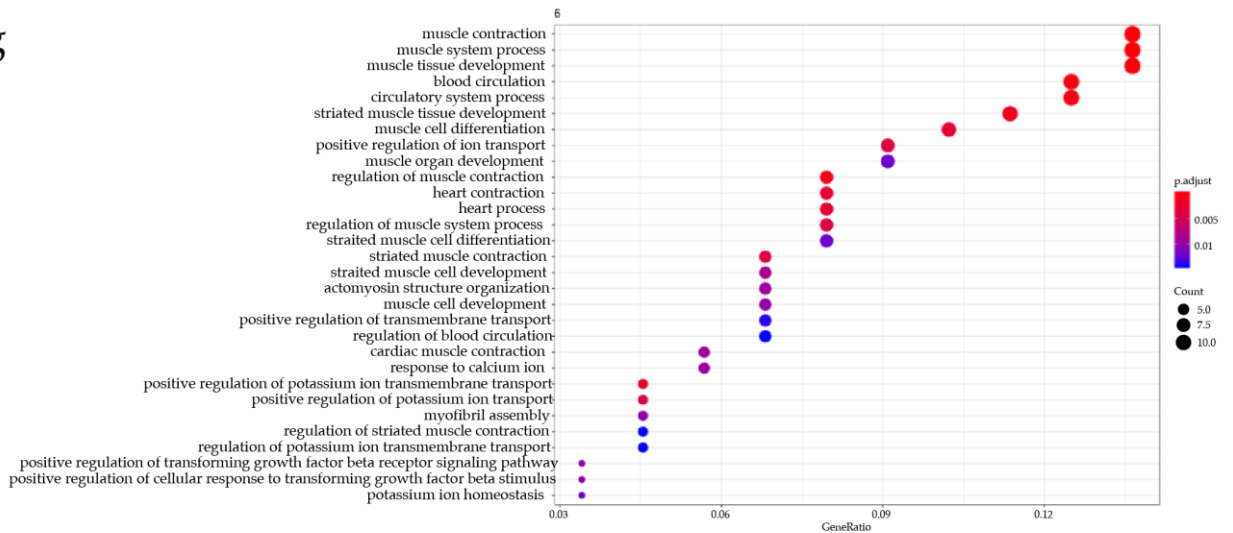

**Figure S5.** Bubble plot of GO term enriched analysis of cluster: (a) cluster 0; (b) cluster 1; (c) cluster 2; (d) cluster 3; (e) cluster 4; (f) cluster 5; (g) cluster 6. Dot size is proportional to the number of genes overlapping with each GO term and the adjusted  $p$ -value is colour-coded from red to blue,  $n = 6$  mice/group.

**Table S1.** Differentially expressed gene HCD compared with NCD specifically of AA&R-derived cells of Apoe<sup>-/-</sup> mice.

| DIFFERENTIAL EXPRESSION        |               |                |
|--------------------------------|---------------|----------------|
| Arch Root HCD vs Arch Root NCD |               |                |
| 149 Genes <span>UP</span>      |               |                |
| Z210407C18RIK                  | ACKR1         | PERP           |
| SREK1IP1                       | FOSL1         | LAYN           |
| GLIPR1                         | ANGPTL4       | TMPPE          |
| MMD                            | EMCN          | RAB13          |
| TAPT1                          | GBE1          | EPB41          |
| SLC35B4                        | FAM20A        | ABCA3          |
| PTGES3L                        | ZFP598        | SH3BGR         |
| FAM63A                         | MIF4GD        | 1700021K19RIK  |
| RRAS2                          | LY96          | MED25          |
| TESK1                          | EXOC2         | OTUB1          |
| POLE3                          | TMEM214       | TMED8          |
| TMEM173                        | PELP1         | NOL10          |
| SLC30A9                        | CACNB3        | NEK6           |
| B3GALT1                        | LDLRAD4       | FOXJ3          |
| STX3                           | GPATCH11      | TMEM53         |
| GNE                            | TNFRSF18      | HSPB6          |
| 1190005I06RIK                  | RGS2          | DNAJC30        |
| ADSL                           | CEP164        | SRD5A3         |
| SLC1A4                         | ANO10         | EIF1AD         |
| EIF4E                          | TSPAN11       | FABP4          |
| PGM5                           | PLOD1         | TLN2           |
| SF3A1                          | YTHDF2        | MRPL3          |
| SDF2L1                         | LSMEM1        | MAP2K1         |
| COX19                          | RPAIN         | INAFM1         |
| RNF220                         | CISD1         | TUG1           |
| SPP1                           | IFT46         | BCL10          |
| FIGF                           | Z210016L21RIK | REL8           |
| GIGYF2                         | MVB12A        | MYDGF          |
| AURKAIP1                       | RGS7BP        | ARL6IP5        |
| PDLIM1                         | HTRA4         | LOXL3          |
| FBXO33                         | CCDC25        | SYAP1          |
| TLK1                           | RAMP1         | AARS           |
| RICTOR                         | ESYT1         | GRPEL1         |
| ENAH                           | RAB8A         | GM6402         |
| RIOK3                          | NDUF83        | HIGD1A         |
| 0610037L13RIK                  | OXR1          | FUNDG2         |
| KCNMB1                         | MRPS21        | ZC3H15         |
| SNRPE                          | XPO1          | CDK11B         |
| PA2G4                          | MICAL2        | TPM2           |
| CFLAR                          | LRP10         | PRDX6          |
| CRELD2                         | CNN1          | ECH1           |
| RPS7                           | TBCA          | NPNT           |
| RPL7                           | NDUF89        | TOMM7          |
| MCFD2                          | NARS          | ITGAV          |
| RPSA                           | BC048507      | AKAP2          |
| GSTT1                          | MUSTN1        | UQCRB          |
| FAT1                           | CSNK1A1       | COX7A2         |
| SRSF2                          | PSMC3         | Z410006H16R... |
| PDLIM7                         | RPS16         | ATP5O          |
| TBRG1                          | GPC6          |                |
| 28 Genes <span>DOWN</span>     |               |                |
| ZFP623                         | CHAD          | SOLE           |
| CIPC                           | CXCL14        | LPAR6          |
| PACS1                          | RARB          | GM20199        |
| DCLRE1A                        | PF4           | LMTK2          |
| ACY1                           | COL2A1        | DCAF17         |
| TMEM88                         | MAPKBP1       | AIS07597       |
| VLDLR                          | HHIP          | SELE           |
| LAMC3                          | PJA1          | TSPAN5         |
| PLTP                           | RBP4          | SMOC1          |
| NR4A1                          |               |                |



**Table S2.** Differentially expressed gene HCD compared with NCD specifically of DT aorta of *Apoe*<sup>-/-</sup> mice.

DIFFERENTIAL EXPRESSION

Thalamic HCD vs Thalamoc NCD

337 Genes

111 Genes

DOWN

|              |          |              |         |              |          |           |              |               |  |  |  |               |              |          |  |  |  |  |  |  |  |  |
|--------------|----------|--------------|---------|--------------|----------|-----------|--------------|---------------|--|--|--|---------------|--------------|----------|--|--|--|--|--|--|--|--|
| TPP3         | DDX54    | TMEM261      | ATXN10  | RAD23B       | ANO10    | SLC4A6    | OLFR1033     | TMEM110       |  |  |  | KLK8          | AHSG         | BACE2    |  |  |  |  |  |  |  |  |
| SLC25A39     | MFAP3    | CREB3        | ABCE1   | SLC25A24     | SPP1     | LSM14A    | FBIN         | ANAPC4        |  |  |  | KLK9          | AHSG         | BACE2    |  |  |  |  |  |  |  |  |
| CD44         | QARD01   | P1GX         | LRPPRC  | GALNT16      | GPAA1    | NAT6      | RAPH1        | LYST          |  |  |  | ADH1          | G0S2         | KANK4    |  |  |  |  |  |  |  |  |
| ACAMTSL5     | TARS     | ARRB1        | FAM98A  | HNRNPPLL     | SOHC     | NF1       | THBS2        | ANAPC7        |  |  |  | 1500015010R.. | IFT3         | ABCG2    |  |  |  |  |  |  |  |  |
| SEPT6        | FABP4    | TMC6         | FBXW7   | 1810062J23BK | PIK3R1   | AMMEER1L  | QRICH1       | PRKAR2A       |  |  |  | FZD4          | PAGR1A       | FAM74B   |  |  |  |  |  |  |  |  |
| FZD1         | ELOF1    | NUS1         | FUNCDC1 | SLC25A46     | CERS2    | MUSTN1    | NBL1         | E03001319RK   |  |  |  | ARL5B         | RNF31        | HS6ST1   |  |  |  |  |  |  |  |  |
| SYNRG        | ITIH4    | OPTN         | MAP2K7  | GNAI1        | ZCHC124  | ARFGEF1   | SCARB2       | TNKG          |  |  |  | RBBP5         | S100B        | GOLM1    |  |  |  |  |  |  |  |  |
| KCNH2        | TCAP     | KCNMA1       | ABHD14A | PRDM5        | GNAO1    | HSPB6     | 2310022B05RK | ARL8B         |  |  |  | RRS1          | SPPT20       | NDOUAF5  |  |  |  |  |  |  |  |  |
| PRPS2        | LAS1L    | PHYH         | TUBB6   | TMEM389      | ZFP771   | FKBP10    | EP300        | MMP23         |  |  |  | TMEM183A      | COCH         | ALOX5AP  |  |  |  |  |  |  |  |  |
| SSSCA1       | AARS01   | AGAP1        | MRPL41  | RNF181       | DESIZ    | ZBTB38    | RERE         | BICD2         |  |  |  | MFNG          | ZFP9         | ILVLB    |  |  |  |  |  |  |  |  |
| NUDT9        | MARF1    | OXSR1        | TMEM253 | UBE2D2A      | VP54A    | DIK15     | 1810058J24RK | MTFN          |  |  |  | ACKR3         | LDLRAP1      | ALDH1A1  |  |  |  |  |  |  |  |  |
| CACNA1C      | MOIRF4L2 | 119000506/RK | RHOG    | SPSB1        | PRKAB2   | TMEM65    | EFEMP2       | PPP2R5A       |  |  |  | SLC02A1       | MICN         | NR1P1    |  |  |  |  |  |  |  |  |
| PAWR         | SREBF1   | RPRD1B       | ALDH7A1 | SEMA5A       | ATRB81   | AGRN      | MTUS2        | UNC5C         |  |  |  | MBO1          | MB1          | FLNB7    |  |  |  |  |  |  |  |  |
| FAM210A      | PROHSD1  | IFT46        | FAM89B  | CAN01        | JAK1     | DAG1      | RAN          | FKBP8         |  |  |  | ZFP669        | CDK12        | SIPA1L1  |  |  |  |  |  |  |  |  |
| GM15417      | MROH1    | RAD23A       | INF2    | SEC24C       | TRAPPC2L | FKBP3     | MRPL33       | RIGF          |  |  |  | XIRP1         | INT56        | APOD     |  |  |  |  |  |  |  |  |
| NCPB1        | TESK1    | EDEM1        | SMARCD3 | MYO1E        | ADCY7    | SORBS2    | PDHA1        | 2310036022R.. |  |  |  | ZFP280G       | CNNM3        | KL4      |  |  |  |  |  |  |  |  |
| LZTR1        | WBSCR22  | GLO1         | ZFP68   | FNIP1        | CSNK2A1  | MSRB1     | HSPG1        | IMMT          |  |  |  | GJ44          | 2310035C23RK | WSB1     |  |  |  |  |  |  |  |  |
| ACP2         | MPS56    | RPS56        | PAIP1   | GLUPR1       | KANSL3   | DNAJC5    | MYOCD        | ARF1          |  |  |  | CERK          | ATG9A        | SOS1     |  |  |  |  |  |  |  |  |
| NEK9         | COL8A1   | SLAN2        | SHARP2  | SDHA72       | MALSU1   | EC031181  | CHCHD1       | ZCH313        |  |  |  | EGLF7         | TMEM9        | PLCE1    |  |  |  |  |  |  |  |  |
| MLEC         | CLMP     | FAT4         | WDK6    | ESD          | EXOC68   | S100A4    | PCP4L1       | NES           |  |  |  | ELP2          | PER1         | FAM168Z  |  |  |  |  |  |  |  |  |
| ABDC5        | NFATC3   | WFS1         | SOD4    | OPT1A        | SCFD1    | ALCAM     | GLG1         | EEF1B2        |  |  |  | SFRP1         | CYTL1        | AD03     |  |  |  |  |  |  |  |  |
| MRC2         | KLHL28   | TBPL1        | HXCD1   | ARHGAP23     | IGSF3    | HMCN3     | SEMA3C       | ANP32E        |  |  |  | KDM6B         | EPH4Z        | NR4A2    |  |  |  |  |  |  |  |  |
| SEC61A1      | DAPK2    | ITSN1        | EFHD1   | TMEM167      | CRAT     | BRD4      | MDA          | MSRB3         |  |  |  | MA2P9K3       | 2900060814RK | IFNGR1   |  |  |  |  |  |  |  |  |
| HBS1L        | SLC20A2  | COL4A6       | POF5    | GATAD2A      | CUEDC1   | QUCY1B3   | PP2YCA       | ATP1B3        |  |  |  | EFEMP1        | METTL7A1     | BMX      |  |  |  |  |  |  |  |  |
| MAN2A2       | SAMHD1   | PPP1R15B     | POF5    | GATAD2A      | CUEDC1   | QUCY1B3   | PP2YCA       | ATP1B3        |  |  |  | NR4A1         | FNRC1        | EIF5     |  |  |  |  |  |  |  |  |
| BAG5         | CSNK1G2  | CTCF         | RFBMS2  | HSPB2        | OSGPE    | STS       | ITGAV        | NDRG2         |  |  |  | CH102         | BMP4         | MZP2K3   |  |  |  |  |  |  |  |  |
| ARHGEF4      | MMP14    | ZMYM4        | SEC61G  | DYNLT3       | OLFM12B  | SAMD4     | LRP1         | HMGN1         |  |  |  | ENTPD2        | NP-904339.1  | FAP36L1  |  |  |  |  |  |  |  |  |
| F70          | LYPLAL1  | NOMY01       | CACXYB  | AGL          | MAN1A2   | PNP       | HNRNPCC      | CENPB         |  |  |  | FOSB          | SMAD7        | KCNQ10T1 |  |  |  |  |  |  |  |  |
| COA5         | UBXN7    | DYNLC1L1     | UPF38   | B3GNT1       | DOX1     | MYEOV2    | FBXO30       | ATP6V1A       |  |  |  | POLR2A        | ABLUM1       | NUAK1    |  |  |  |  |  |  |  |  |
| AHSA1        | STAUI1   | GXY10L1      | CRYAB   | INTS3        | CTDSBP2  | DEGSI     | PPP1CB       | MERIP         |  |  |  | CC4C2EP3      | ADAMTSL1     | NFKBIZ   |  |  |  |  |  |  |  |  |
| SEPT8        | DDP3     | 110009WE24RK | MTSPS1  | TMEM873      | DNAJC13  | GSTP1     | PLEC         | PI5           |  |  |  | KLIF9         | PECAM1       | FAMC3    |  |  |  |  |  |  |  |  |
| ARHGAP44     | MARCK3   | SURF1        | SBCP5   | M8T59        | PPP1R9B  | BBF3      | RARRS2       | POLIM7        |  |  |  | GAT6A         | PTPRB        | MALAT1   |  |  |  |  |  |  |  |  |
| CAV3         | SLC21    | KOLRL3       | MNTO3   | WZC05        | DLG1     | BLOC1S1   | SOST         | HSPB1         |  |  |  | FBLN1         | IER3         | CFH      |  |  |  |  |  |  |  |  |
| DHX29        | RCAN3    | DECRI        | EXOC5   | OSR1         | NUP153   | COL3A1    | VGQRIC1      | RP2S1         |  |  |  | RBM39         | FOS          | ID3      |  |  |  |  |  |  |  |  |
| 0610009L18RK | EBP      | MED14        | EMC8    | MPND         | OSBP1L1A | ACTN1     | HSPB1        | UCR10         |  |  |  | HE51          | DDX5         | RPS24    |  |  |  |  |  |  |  |  |
| WOFY1        | IGF1B3   | SEHL1        | PTK2    | DTNA         | PPPIA1   | LGALS1    | CX3A5A1      | OGN           |  |  |  | UBC           | RPS4X        | DCN      |  |  |  |  |  |  |  |  |
| ATG5         | IFB35    | SNAP23       | PTPN2   | NEO1         | PPIC     | OSPL14P51 |              |               |  |  |  |               |              |          |  |  |  |  |  |  |  |  |
| MAPK6        | KIFAP3   | A430105I19RK |         |              |          |           |              |               |  |  |  |               |              |          |  |  |  |  |  |  |  |  |
